# Supplementary material for: Identifying and Targeting Sporadic Oncogenic Genetic Aberrations in Mouse Models of Triple-Negative Breast Cancer
Source: Oxford University Press journal article supplement (doi:10.1158/2159-8290.cd-17-0679), 2017-12-04
Supplement: 21598290cd170679-sup-184854_2_supp_4402510_1zq0ly.xlsx [file 21598290cd170679-sup-184854_2_supp_4402510_1zq0ly.xlsx]

## Sheet: Key
Tab	Description
PAM50	Probability of each subtype assignment for each sample using the PAM50 classifier
AIMs	Probability of each subtype assignment for each sample using the AIMs classifier
AIMs clustering genes	Entrez gene IDs used to cluster human and mouse samples together
Markers	Status for ER, PR, and HER2 per tumor

## Sheet: PAM50
	Basal-like	Luminal A	Luminal B	HER2-enriched	Normal-like
HL169	1	1.16695e-13	1.63909e-12	2.92115e-14	2.73082e-09
HL109	1	3.64151e-09	6.31403e-08	1.40189e-09	6.07476e-08
HL142	0.999999	1.01259e-09	2.07913e-09	5.98813e-11	5.14054e-07
HL70	0.999999	2.00322e-08	3.11225e-08	1.56512e-09	9.12421e-07
HL125	0.999999	1.21983e-07	4.63055e-07	1.59513e-08	7.02191e-07
HL50	0.999998	6.78419e-08	1.75096e-07	8.91716e-09	1.40061e-06
HL106	0.999998	2.28973e-08	3.0388e-08	8.37182e-10	1.77587e-06
HL77	0.999998	1.19355e-09	6.50406e-10	3.16109e-11	2.28892e-06
HL140	0.999998	1.05029e-07	2.43946e-07	3.42965e-08	1.94116e-06
HL78	0.999998	1.46363e-11	1.61293e-11	1.41078e-12	2.48736e-06
HL119	0.999997	4.27201e-08	6.71136e-08	4.0593e-09	2.5546e-06
HL132	0.999997	2.03878e-07	2.4925e-07	5.91071e-09	2.2161e-06
HL135	0.999997	8.02877e-11	3.99033e-11	4.34182e-12	2.91952e-06
HL71	0.999996	3.16584e-09	1.98493e-09	1.20419e-10	4.12597e-06
HL76	0.999996	4.40116e-08	1.71349e-07	5.00619e-09	4.13678e-06
HL163	0.999995	4.3102e-12	2.9777e-12	1.35475e-13	4.54143e-06
HL91	0.999995	1.02767e-11	9.69645e-12	7.37094e-13	4.99416e-06
HL123	0.999995	4.92168e-10	2.92855e-10	2.45985e-11	5.41525e-06
HL75	0.999992	7.62483e-10	4.06225e-10	3.94262e-11	7.92428e-06
HL141	0.999992	1.29621e-07	9.33266e-08	3.14275e-09	7.96116e-06
HL74	0.999992	4.53851e-09	2.30229e-09	7.15511e-11	8.44079e-06
HL104	0.999991	6.30931e-12	1.25519e-12	1.48117e-13	8.68929e-06
HL149	0.999991	7.89235e-07	8.37018e-07	3.47027e-08	7.48557e-06
HL124	0.999991	1.29832e-06	7.36842e-06	3.27187e-07	4.9725e-07
HL100	0.999983	4.15483e-08	2.13681e-08	1.07871e-09	1.72392e-05
HL127	0.999979	8.63581e-11	1.77072e-11	9.47962e-13	2.09748e-05
HL164	0.999976	1.47281e-06	2.24213e-05	2.60548e-07	3.22634e-07
HL148	0.999957	2.60687e-11	4.76856e-12	3.33105e-13	4.29487e-05
HL131	0.999946	7.33211e-10	1.04259e-10	1.4125e-11	5.39021e-05
HL162	0.999927	4.28104e-07	2.16909e-07	4.30462e-09	7.2238e-05
HL145	0.999926	1.91219e-06	6.93827e-05	2.65896e-06	5.07013e-08
HL79	0.999925	4.8548e-10	1.13323e-10	9.83656e-12	7.46568e-05
HL144	0.999875	3.07853e-05	3.21258e-05	9.12091e-07	6.11321e-05
HL157	0.999815	1.10843e-08	1.8754e-09	6.53927e-11	0.000184757
HL65	0.999784	1.76938e-06	0.000212151	2.30876e-06	2.76031e-08
HL122	0.999772	9.12251e-09	6.9272e-10	3.90669e-11	0.000227729
HL118	0.999771	1.51199e-10	1.03925e-11	9.48789e-13	0.000229399
HL174	0.999745	4.1185e-05	3.53451e-05	4.09412e-06	0.000174613
HL114	0.99972	2.91639e-07	7.29021e-08	1.07428e-08	0.000279749
HL108	0.999663	8.64026e-06	0.000322647	5.44136e-06	2.0008e-07
HL156	0.999632	6.20403e-05	0.000233895	6.37489e-05	8.81458e-06
HL171	0.999556	5.64087e-05	0.000376822	5.40108e-06	5.76947e-06
HL152	0.999536	1.43124e-07	1.53693e-08	1.18425e-09	0.000463744
HL130	0.999532	1.9625e-09	6.73306e-11	3.15129e-12	0.000467926
HL136	0.999474	2.28609e-05	0.000494787	6.7449e-06	1.15908e-06
HL158	0.999398	3.46027e-05	0.000556394	8.53883e-06	2.371e-06
HL129	0.999149	6.40634e-06	0.000832652	1.2299e-05	1.94771e-08
HL17	0.998676	8.54843e-06	0.00130133	1.43581e-05	2.5889e-08
HL133	0.998561	0.000384394	0.000945768	9.08973e-05	1.76157e-05
HL18	0.998445	9.00806e-06	0.00151295	3.33107e-05	2.50099e-08
HL120	0.998375	1.21458e-10	5.66875e-12	2.82355e-13	0.00162545
HL128	0.998184	4.04194e-05	0.00126703	0.00050777	7.77381e-07
HL80	0.997888	4.11109e-10	9.0107e-12	7.33429e-13	0.00211206
HL126	0.997224	9.805e-07	7.74577e-08	7.88038e-09	0.00277531
HL64	0.997064	2.13987e-05	0.00285397	6.07195e-05	3.57629e-08
HL161	0.996452	1.61933e-05	0.00326374	0.000268227	2.44892e-08
HL170	0.996332	1.15012e-05	0.00359907	5.74449e-05	5.46741e-09
HL147	0.996171	1.45125e-05	1.69838e-06	3.8296e-08	0.00381298
HL176	0.994939	9.22102e-05	0.00491035	5.8092e-05	1.56595e-07
HL01	0.990239	0.00193522	0.00763563	2.9072e-05	0.000160639
HL168	0.982646	0.000102271	0.0170899	0.000161339	4.46582e-08
HL121	0.97567	0.000129167	0.0237845	0.000416369	2.89748e-08
HL155	0.974523	0.000231106	0.0247457	0.000499815	7.11885e-08
HL151	0.973931	0.00967672	0.0011665	5.30581e-05	0.0151729
HL173	0.97276	0.000157716	0.0263678	0.000714662	3.31685e-08
HL08	0.961691	0.000261275	0.0376219	0.000426008	5.06372e-08
HL-167-2	0.954468	0.000188748	0.0444821	0.000861219	1.87429e-08
HL63	0.947808	0.000122584	0.0477831	0.00428664	2.45137e-08
HL105	0.945105	0.000212424	0.0541897	0.000492729	1.56034e-08
HL177	0.944421	1.26868e-06	1.79904e-08	5.63828e-09	0.0555778
HL134	0.943964	0.00145947	0.0470996	0.00747631	8.25351e-07
HL113	0.94297	0.00122523	0.0488957	0.00690827	6.06677e-07
HL47	0.909711	0.000605429	0.080497	0.00918634	1.60998e-07
HL23	0.870123	0.00233838	0.125658	0.00187929	1.01252e-06
HL138	0.85965	2.88514e-07	2.68071e-09	1.4479e-09	0.14035
HL175	0.822656	0.00153646	0.166179	0.00962916	1.1039e-07
HL40	0.733251	0.000707601	0.254549	0.0114928	8.87966e-09
HL107	0.690829	0.0322452	0.265463	0.0113984	6.47217e-05
HL153	0.525106	0.0472373	0.403765	0.0238452	4.63713e-05
HL165	0.440419	2.03874e-06	1.06535e-08	5.69283e-10	0.559579
HL112	0.401221	1.65619e-08	2.55493e-11	1.0267e-12	0.598779
HL137	0.394841	0.00296231	0.594026	0.00817062	2.77311e-08
HL02	0.332714	0.0331983	0.622197	0.0118752	1.56925e-05
HL166	0.168728	0.00265056	0.814887	0.0137339	7.59073e-09
HL160	0.0535993	0.0220675	0.916442	0.00789142	2.18542e-07
HL117-2598	0.000246716	0.0103776	6.41538e-05	4.26518e-06	0.989307
HL115-2374	0.000225635	1.33428e-05	1.61114e-08	1.42282e-09	0.999761
HL116-2453	8.03528e-05	0.000278703	4.02794e-07	4.09249e-08	0.999641

## Sheet: AIMs
	Basal	Her2	LumA	LumB	Normal
HL107	2.04e-09	1	2.74e-120	7.19e-37	1.27e-22
HL136	1	1.35e-08	5.89e-158	4.95e-54	5.9e-45
HL153	4.4e-05	0.999956	7.35e-127	5.47e-44	3.79e-16
HL151	0.999999	8.04e-07	1.96e-79	4.34e-33	7.38e-34
HL152	1	1.67e-14	3.85e-162	5.09e-72	6.03e-50
HL156	1	3.23e-14	1.33e-171	2.9e-69	1.9e-65
HL137	1	1.29e-07	5.05e-139	1.32e-36	5.65e-45
HL157	1	6.83e-10	2.81e-173	6.25e-61	6.29e-55
HL158	1	6.86e-08	1.09e-150	8.56e-47	8.07e-41
HL138	1	1.86e-10	2.95e-138	1.66e-66	1.17e-27
HL118	1	1.72e-17	2.88e-166	6.15e-68	2.43e-56
HL80	1	7.69e-14	1.54e-144	1.61e-65	4e-33
HL17	0.999999	1.48e-06	9.35e-167	1.53e-45	1.07e-63
HL18	0.999999	5.17e-07	1.22e-163	1.41e-43	2.15e-59
HL65	0.999947	5.33e-05	6.25e-156	4.42e-42	8.46e-50
HL119	1	1.91e-08	9.28e-154	2.78e-54	3.06e-52
HL140	1	5.58e-12	4.65e-159	7.81e-48	7.21e-60
HL40	1	4.14e-07	4.17e-169	3.29e-46	1.84e-59
HL160	0.980373	0.0196266	2.27e-121	9.6e-18	3.55e-48
HL23	0.999999	1.22e-06	5.31e-166	1.52e-41	2.64e-63
HL120	1	5.07e-12	2.01e-160	1.19e-62	1.9e-41
HL161	1	7.2e-12	3.82e-184	3.49e-56	5.36e-72
HL141	1	8.45e-16	4.19e-169	2.23e-65	1.68e-60
HL142	1	9.89e-16	2.24e-190	2.28e-64	1.85e-71
HL74	1	1.02e-13	1.62e-173	1.08e-61	8.7e-52
HL78	1	9e-15	9.8e-193	3.63e-71	2.87e-69
HL121	1	1.39e-08	4.97e-171	4.08e-50	1.55e-57
HL122	1	8.09e-18	7.98e-170	6.26e-73	6.98e-60
HL162	1	9.92e-19	1.6e-188	3.22e-73	2.19e-61
HL123	1	1.25e-16	2.42e-192	4.47e-69	6.04e-72
HL91	1	1.01e-09	2.36e-156	1.48e-54	3.64e-57
HL100	1	9.58e-12	3.27e-166	1.23e-63	1.91e-60
HL124	1	1.46e-14	2.37e-169	1.02e-62	5.65e-64
HL132	1	8.35e-12	2.19e-164	4.32e-61	2.7e-61
HL125	1	5.82e-16	2.13e-190	6.51e-67	5.46e-66
HL144	1	2.41e-15	7.27e-187	8.16e-72	1e-57
HL63	1	4.79e-08	7.2e-172	4.43e-47	4.05e-65
HL64	1	5.31e-08	7.42e-169	5.47e-44	1.03e-63
HL08	1	5.03e-09	5.43e-168	2.91e-50	1.91e-62
HL47	0.99996	3.98e-05	2.23e-156	2.47e-44	8.17e-46
HL145	1	2.07e-10	7.28e-165	4.05e-54	1.47e-66
HL114	1	3.17e-13	1.78e-157	5.96e-68	3.73e-46
HL126	1	4.33e-12	5.03e-156	7.86e-69	5.94e-44
HL70	1	6.72e-20	3.08e-175	2.12e-77	1.4e-61
HL71	1	8.24e-17	1.74e-171	2.45e-75	4.25e-59
HL127	1	1.42e-12	3.39e-165	6.93e-64	4.99e-57
HL128	1	4.77e-07	2.02e-138	8.75e-50	4e-31
HL147	0.988634	0.0113658	8.33e-83	2.33e-32	3.23e-42
HL163	1	8.71e-10	1.94e-159	1.44e-55	1.64e-60
HL105	1	8.7e-09	6.04e-169	1.94e-48	5.09e-58
HL129	0.999998	2.08e-06	9.76e-168	4.57e-51	6.16e-49
HL106	1	8.19e-14	3.88e-156	3.71e-58	3.11e-54
HL164	1	3.25e-08	1.2e-180	1.19e-51	2.87e-69
HL130	1	6.08e-20	1.21e-189	4.14e-76	9.03e-60
HL79	1	4.6e-15	4.24e-124	5.97e-64	5.48e-46
HL50	1	2.95e-14	4.49e-187	2.37e-64	4.05e-66
HL76	1	2.86e-09	4.32e-152	1.83e-56	1.63e-48
HL77	1	3.81e-14	1.43e-188	4e-66	2.01e-69
HL104	1	4.89e-11	7.81e-156	5.32e-66	5.85e-47
HL148	1	3.22e-18	5.89e-182	3.73e-68	8.58e-55
HL149	1	5.33e-17	3.38e-173	1.23e-70	2.78e-64
HL108	1	7.34e-10	5.41e-177	3.35e-52	5.2e-62
HL155	1	2.23e-10	3.48e-176	1.15e-47	2.66e-64
HL131	1	1.57e-17	6.52e-191	1.96e-70	1.95e-68
HL01	0.940797	0.0592032	5.08e-122	6.69e-20	1.49e-38
HL02	0.999968	3.19e-05	3.24e-116	4.89e-18	2.14e-38
HL165	0.950256	0.0445083	2.57e-64	1.06e-48	0.00523568
HL166	1	1.02e-08	7.01e-156	2.37e-29	6.1e-70
HL75	1	7.19e-20	7.6e-168	3.09e-71	1.26e-59
HL133	1	5.16e-18	1.21e-167	2.47e-76	1.44e-53
HL109	1	9.96e-14	1.29e-182	5.54e-56	8.53e-67
HL-167-2	0.999999	8.77e-07	1.57e-173	4.37e-47	3.14e-68
HL113	1	3.79e-07	1.33e-158	1.52e-46	1.9e-49
HL134	1	2.55e-08	2.3e-168	1.29e-50	1.75e-53
HL135	1	1.92e-13	9.39e-165	6.58e-70	2.77e-56
HL169	1	5.3e-08	2.99e-158	6.04e-51	1.3e-64
HL170	1	7.61e-08	1.02e-170	1.38e-45	3.66e-62
HL168	0.999947	5.27e-05	1.4e-167	1.76e-43	3.3e-56
HL112	1	1.05e-15	3.36e-148	6.63e-74	1.41e-20
HL171	1	3.29e-07	1.48e-153	2.11e-42	7.61e-42
HL173	1	1.1e-08	3.12e-164	2.5e-49	6.26e-56
HL174	1	9.1e-11	3.55e-160	7.7e-65	1.97e-53
HL175	1	6.84e-10	2.2e-153	1.4e-30	2.01e-64
HL115-2374	5.5e-34	1.46e-21	2.49e-45	1.59e-44	1
HL116-2453	2.02e-50	1.4e-36	7.04e-48	2.75e-60	1
HL117-2598	1.61e-44	1.85e-25	1.87e-39	2.77e-44	1
HL177	1	6.31e-19	4.64e-182	2.8e-77	2.62e-51
HL176	1	1.7e-08	8.98e-165	5.38e-43	3.98e-57

## Sheet: AIMs clustering genes
7802
55143
991
11004
55765
51514
1063
29097
2330
6279
259266
4751
3930
142
2625
55165
36
56521
2674
54970
57758
54843
4316
1410
23650
3875
3489
7450
3945
29127
3852
8914
1466
3479
1033
4331
3169
9133
83464
771
9055
18
57496
6376
1001
9914
1728
79152
6416
3872
10948
2064
2886
4137
55040
332
4239
7153
3861
4222
5718
7083
7298
10403
3909
25800
596
1153
1264
3249
10055
25759
2593
51295
6241
1058
72
8942
10477
79083
6382
53335
29842
3667
11065
128553
5111
7033
1476
9620
2317
4171
6787
5918
5984
3815
306
4085
4886
90355
9232
2568
2264
54463
1036
8614
2296
3400
7272
55084
2099
25803
27242
27075
2617
857
3202
5764
9
2053
9070
4067
55353
55872
23303
6422
51571
9833
1164
2934
4781
2203
7102
367
3476
9338
5613
9452

## Sheet: Markers
samples	HER2_status	PR_status	ER_status
HL107	Negative	Negative	Negative
HL136	Negative	Negative	Negative
HL153	Negative	Negative	Negative
HL151	Negative	Positive	Negative
HL152	Negative	Positive	Negative
HL156	Negative	Negative	Negative
HL137	Negative	Negative	Negative
HL157	Negative	Negative	Negative
HL158	Negative	Negative	Negative
HL138	Negative	Negative	Negative
HL118	Negative	Negative	Negative
HL80	Negative	Positive	Negative
HL17	Negative	Negative	Negative
HL18	Negative	Negative	Negative
HL65	Negative	Negative	Negative
HL119	Negative	Negative	Negative
HL140	Negative	Positive	Negative
HL40	Negative	Negative	Negative
HL160	Negative	Negative	Negative
HL23	Negative	Negative	Negative
HL120	Negative	Negative	Negative
HL161	Negative	Negative	Negative
HL141	Negative	Positive	Negative
HL142	Negative	Negative	Negative
HL74	Negative	Positive	Negative
HL78	Negative	Negative	Negative
HL121	Negative	Negative	Negative
HL122	Negative	Positive	Negative
HL162	Negative	Positive	Negative
HL123	Negative	Negative	Negative
HL91	Negative	Negative	Negative
HL100	Negative	Positive	Negative
HL124	Negative	Positive	Negative
HL132	Negative	Negative	Negative
HL125	Negative	Positive	Negative
HL144	Negative	Positive	Negative
HL63	Negative	Negative	Negative
HL64	Negative	Negative	Negative
HL08	Negative	Negative	Negative
HL47	Negative	Negative	Negative
HL145	Negative	Positive	Negative
HL114	Negative	Positive	Negative
HL126	Negative	Positive	Negative
HL70	Negative	Positive	Negative
HL71	Negative	Positive	Negative
HL127	Negative	Positive	Negative
HL128	Negative	Negative	Negative
HL147	Negative	Positive	Negative
HL163	Negative	Negative	Negative
HL105	Negative	Negative	Negative
HL129	Negative	Negative	Negative
HL106	Negative	Negative	Negative
HL164	Negative	Negative	Negative
HL130	Negative	Negative	Negative
HL79	Negative	Positive	Negative
HL50	Negative	Negative	Negative
HL76	Negative	Negative	Negative
HL77	Negative	Negative	Negative
HL104	Negative	Negative	Negative
HL148	Negative	Negative	Negative
HL149	Negative	Negative	Negative
HL108	Negative	Negative	Negative
HL155	Negative	Negative	Negative
HL131	Negative	Negative	Negative
HL01	Negative	Positive	Positive
HL02	Negative	Positive	Positive
HL165	Negative	Positive	Negative
HL166	Negative	Negative	Negative
HL75	Negative	Negative	Negative
HL133	Negative	Positive	Negative
HL109	Negative	Negative	Negative
HL-167-2	Negative	Negative	Negative
HL113	Negative	Negative	Negative
HL134	Negative	Negative	Negative
HL135	Negative	Negative	Negative
HL169	Negative	Negative	Negative
HL170	Negative	Negative	Negative
HL168	Negative	Negative	Negative
HL112	Negative	Positive	Negative
HL171	Negative	Negative	Negative
HL173	Negative	Negative	Negative
HL174	Negative	Negative	Negative
HL175	Negative	Negative	Negative
HL115-2374	Negative	Positive	Negative
HL116-2453	Negative	Positive	Negative
HL117-2598	Negative	Positive	Negative
HL177	Negative	Negative	Negative
HL176	Negative	Negative	Negative
