# Supplementary material for: Identifying and Targeting Sporadic Oncogenic Genetic Aberrations in Mouse Models of Triple-Negative Breast Cancer
Source: Oxford University Press journal article supplement (doi:10.1158/2159-8290.cd-17-0679), 2017-12-04
Supplement: 21598290cd170679-sup-184854_2_supp_4402511_czq0ly.xlsx [file 21598290cd170679-sup-184854_2_supp_4402511_czq0ly.xlsx]

## Sheet: Key
Column	Description
CHROM	Chromosome of the mutation
POS	Genomic position of the mutation
REF	Reference allele
ALT	Alternative allele
GENE	Gene
TRANSCRIPT	Canonical transcript
BASE PAIR CHANGE	Base pair change
AMINO ACID CHANGE	Amino acid change
EFFECT	SnpEff predicted effect of the mutation
SAMPLE COUNT	Number of samples the mutation was found in
samples	mutation clonality (variant-supporting reads/total reads)

## Sheet: mutations
CHROM	POS	REF	ALT	GENE	TRANSCRIPT	BASE PAIR CHANGE	AMINO ACID CHANGE	EFFECT	SAMPLE COUNT	HL-WES-43	HL119	HL-WES-42	HL140	HL74	HL-WES-44	HL158	HL-WES-60	HL-WES-61	HL23	HL118	HL-WES-29	HL-WES-01	HL-WES-58	HL137	HL161	HL107	HL65	HL78	HL40	HL-WES-57	HL18	HL-WES-59	HL-WES-18	HL141	HL120	HL17	HL80	HL-WES-19	HL156	HL157	HL-WES-45	HL138	HL-WES-64	HL160	HL-WES-47	HL162	HL-WES-65	HL-WES-62	HL64
1	4892006	T	A	Tcea1	ENSMUST00000165720.2	c.648T>A	p.Asn216Lys	missense_variant	1	-	-	-	-	-	-	-	-	-	-	-	-	-	-	-	-	-	-	-	-	-	-	-	-	-	-	-	-	-	-	-	-	-	-	-	-	-	-	-	-
1	6770919	C	CTT	St18	ENSMUST00000043578.12	c.56-10_56-9dupTT		splice_region_variant&intron_variant	1	-	-	-	-	-	-	-	-	-	-	-	-	-	-	-	-	-	-	-	-	-	-	-	-	-	-	-	-	-	-	-	-	-	-	-	-	-	-	-	-
1	9553616	G	C	Adhfe1	ENSMUST00000144177.7	c.348-7G>C		splice_region_variant&intron_variant	1	-	-	-	-	-	-	-	-	-	-	-	-	-	-	-	-	-	-	-	-	-	-	-	-	-	-	-	-	-	-	-	-	-	-	-	-	-	-	-	-
1	9747713	G	C	Vcpip1	ENSMUST00000057438.6	c.444C>G	p.Leu148Leu	synonymous_variant	2	-	-	-	-	-	-	-	-	-	-	-	-	-	-	-	-	-	-	-	-	-	-	-	-	-	-	-	-	-	-	-	-	-	-	-	-	-	-	-	-
1	9747713	G	C	1700034P13Rik	ENSMUST00000181821.7	n.66G>C		non_coding_transcript_exon_variant	2	-	-	-	-	-	-	-	-	-	-	-	-	-	-	-	-	-	-	-	-	-	-	-	-	-	-	-	-	-	-	-	-	-	-	-	-	-	-	-	-
1	16104395	G	A	Rpl7	ENSMUSG00000043716	n.16104395C>T		intragenic_variant	1	-	-	-	-	-	-	-	-	-	-	-	-	-	-	-	-	-	-	-	-	-	-	-	-	-	-	-	-	-	-	-	-	-	-	-	-	-	-	-	-
1	21079193	T	C	Tram2	ENSMUST00000037998.5	c.-80A>G		5_prime_UTR_variant	1	-	-	-	-	-	-	-	-	-	-	-	-	-	-	-	-	-	-	-	-	-	-	-	-	-	-	-	-	-	-	-	-	-	-	-	-	-	-	-	-
1	30946140	C	A	Ptp4a1	ENSMUST00000027232.13	c.3G>T	p.Met1?	start_lost	1	-	-	-	-	-	-	-	-	-	-	-	-	-	-	-	-	-	-	-	-	-	-	-	-	-	-	-	-	-	-	-	-	-	-	-	-	-	-	-	-
1	33734828	T	C	Rab23	ENSMUST00000088287.9	c.368T>C	p.Ile123Thr	missense_variant	2	-	-	-	-	-	-	-	-	-	-	-	-	-	-	-	-	-	-	-	-	-	-	-	-	-	-	-	-	-	-	-	-	-	-	-	-	-	-	-	-
1	34586980	C	T	Amer3	ENSMUST00000052670.10	c.299C>T	p.Ala100Val	missense_variant	1	-	-	-	-	-	-	-	-	-	-	-	0.1031 (10/97)	-	-	-	-	-	-	-	-	-	-	-	-	-	-	-	-	-	-	-	-	-	-	-	-	-	-	-	-
1	34590698	T	A	Amer3	ENSMUST00000052670.10	c.*1674T>A		3_prime_UTR_variant	1	-	-	-	-	-	-	-	-	-	-	-	-	-	-	-	-	-	-	-	-	-	-	-	-	-	-	-	-	-	-	-	-	-	-	-	-	-	-	-	-
1	36553141	G	GA	Sema4c	ENSMUST00000114991.7	c.635-12dupT		intron_variant	1	-	-	-	-	-	-	-	-	-	-	-	-	-	-	-	-	-	-	-	-	-	-	-	-	-	-	-	-	-	-	-	-	-	-	-	-	-	-	-	-
1	39379421	G	A	Tbc1d8	ENSMUST00000054462.10	c.2472+34C>T		intron_variant	1	-	-	-	-	-	-	-	-	-	-	-	-	-	-	-	-	-	-	-	-	-	-	-	-	-	-	-	-	-	-	-	-	-	-	-	-	-	-	-	-
1	40440727	C	A	Il1rl1	ENSMUST00000053043.7	c.-23C>A		5_prime_UTR_variant	1	-	-	-	-	-	-	-	-	-	-	-	-	-	-	-	-	-	-	-	-	-	-	-	-	-	-	-	-	-	-	-	-	-	-	-	-	-	-	-	-
1	43553957	G	A	Nck2	ENSMUST00000086421.8	c.323G>A	p.Arg108His	missense_variant	1	-	-	-	-	-	-	-	-	-	-	-	-	-	-	-	-	-	-	-	-	-	-	-	-	-	-	-	-	-	-	-	-	-	-	-	-	-	-	-	-
1	43554528	G	C	Nck2	ENSMUST00000086421.8	c.894G>C	p.Ala298Ala	synonymous_variant	1	-	-	-	-	-	-	-	-	-	-	-	-	-	-	-	-	-	-	-	-	-	-	-	-	-	-	-	-	-	-	-	-	-	-	-	-	-	-	-	-
1	51757279	G	GA	Myo1b	ENSMUST00000018561.13	c.3007-23dupT		intron_variant	1	-	-	-	-	-	-	-	-	-	-	-	-	-	-	-	-	-	-	-	-	-	-	-	-	-	-	-	-	-	-	-	-	-	-	-	-	0.25 (4/16)	-	-	-
1	52797080	C	CT	Inpp1	ENSMUST00000027271.8	c.225dupA	p.Val76fs	frameshift_variant	1	-	-	-	-	-	-	-	-	-	-	-	-	-	-	-	-	-	-	-	-	-	-	-	-	-	-	-	-	-	-	-	-	-	-	-	-	-	-	-	-
1	53061811	C	A	Mstn	ENSMUST00000027269.6	c.46C>A	p.Leu16Met	missense_variant	1	-	-	-	-	-	-	-	-	0.3069 (31/101)	-	-	-	-	-	-	-	-	-	-	-	-	-	-	-	-	-	-	-	-	-	-	-	-	-	-	-	-	-	-	-
1	53197271	G	A	Pms1	ENSMUST00000027267.13	c.1849C>T	p.Arg617*	stop_gained	3	-	-	-	-	-	-	-	-	-	-	-	-	-	-	-	-	-	-	-	-	-	-	-	-	-	-	-	-	-	-	-	-	-	-	-	-	-	-	-	-
1	53197271	G	A	Gm28777	ENSMUST00000191402.1	n.260-149G>A		intron_variant	3	-	-	-	-	-	-	-	-	-	-	-	-	-	-	-	-	-	-	-	-	-	-	-	-	-	-	-	-	-	-	-	-	-	-	-	-	-	-	-	-
1	55071812	T	C	Coq10b	ENSMUST00000027125.6	c.*9T>C		3_prime_UTR_variant	2	-	-	-	-	-	-	-	-	-	-	-	-	-	-	-	-	-	-	-	-	-	-	-	-	-	-	-	-	-	-	-	-	-	-	-	-	-	-	-	-
1	55145206	G	C	Mob4	ENSMUST00000162364.7	c.206G>C	p.Trp69Ser	missense_variant	2	-	-	-	-	-	-	-	-	-	-	-	-	-	-	-	-	-	-	-	-	-	-	-	-	0.2694 (66/245)	-	-	-	-	-	-	0.3077 (4/13)	-	-	-	-	-	-	-	-
1	57406799	T	G	9430016H08Rik	ENSMUST00000027114.5	c.27T>G	p.Pro9Pro	synonymous_variant	2	-	-	-	-	-	-	-	-	-	-	-	-	-	-	-	-	-	-	-	-	-	-	-	-	-	-	-	-	-	-	-	-	-	-	-	-	-	-	-	-
1	57406799	T	G	Tyw5	ENSMUST00000162686.7	c.-338A>C		5_prime_UTR_variant	2	-	-	-	-	-	-	-	-	-	-	-	-	-	-	-	-	-	-	-	-	-	-	-	-	-	-	-	-	-	-	-	-	-	-	-	-	-	-	-	-
1	57961979	C	T	Kctd18	ENSMUST00000114410.9	c.616G>A	p.Val206Ile	missense_variant	2	-	-	-	-	-	-	-	-	-	-	-	-	-	-	-	-	-	-	-	-	-	-	0.1321 (28/212)	-	-	-	-	-	-	-	-	-	-	-	-	-	-	-	-	-
1	58061207	C	T	Aox1	ENSMUST00000001027.6	c.1162C>T	p.Arg388Trp	missense_variant	1	-	-	-	-	-	-	-	-	-	-	-	-	-	-	-	-	-	-	-	-	-	-	-	-	-	-	-	-	-	-	-	-	-	-	-	-	-	-	-	-
1	60993776	C	T	Icos	ENSMUST00000027162.11	c.133C>T	p.Pro45Ser	missense_variant	1	-	-	-	-	-	-	-	-	-	-	-	-	-	-	-	-	-	-	-	-	-	-	-	-	-	-	-	-	-	-	-	-	-	-	-	-	-	-	-	-
1	63179374	G	C	Eef1b2	ENSMUST00000129339.7	c.523+1G>C		splice_donor_variant&intron_variant	2	-	-	-	-	-	-	-	-	-	-	-	-	-	-	-	-	-	-	-	-	-	-	-	-	-	-	-	-	-	-	-	-	-	-	0.8 (16/20)	-	0.1 (5/50)	-	-	-
1	64732627	T	TA	Fzd5	ENSMUST00000063982.6	c.*2215dupT		3_prime_UTR_variant	1	-	-	-	-	-	-	-	-	-	-	-	-	-	-	-	-	-	-	0.1 (4/40)	-	-	-	-	-	-	-	-	-	-	-	-	-	-	-	-	-	-	-	-	-
1	66801020	G	GA	Kansl1l	ENSMUST00000068168.9	c.1091+28dupT		intron_variant	2	-	-	-	-	-	-	-	-	-	-	-	-	-	-	-	-	-	-	-	-	-	-	-	-	-	-	-	-	-	-	-	-	-	-	-	-	-	-	-	-
1	67195225	A	C	Cps1	ENSMUST00000027144.7	c.2770A>C	p.Thr924Pro	missense_variant	1	-	-	-	-	-	-	-	-	-	-	-	-	-	-	-	-	-	-	-	-	-	-	-	-	-	-	-	-	-	-	-	-	-	-	-	-	-	-	-	-
1	68259145	A	C	Erbb4	ENSMUST00000119142.7	c.2079+36T>G		intron_variant	1	-	-	-	-	-	-	-	-	-	-	-	-	-	-	-	-	-	-	-	-	-	-	-	-	-	-	-	-	-	-	-	-	-	-	-	-	-	-	-	-
1	69870234	T	C	Spag16	ENSMUST00000065425.11	c.519-30T>C		intron_variant	1	-	-	-	-	-	-	-	-	-	-	-	-	-	-	-	-	-	-	-	-	-	-	-	-	-	-	-	-	-	-	-	-	-	-	-	-	-	-	-	-
1	71028323	T	TA	Bard1	ENSMUST00000027393.7	c.*2196dupT		3_prime_UTR_variant	1	-	-	-	-	-	-	-	-	-	-	-	-	-	-	-	-	-	-	-	-	-	-	-	-	-	-	-	-	-	-	-	-	-	-	-	-	-	-	-	-
1	71282918	C	CT	Abca12	ENSMUST00000087268.6	c.5011dupA	p.Ser1671fs	frameshift_variant	1	-	-	-	-	-	-	-	-	-	-	-	-	-	-	-	-	-	-	-	-	-	-	-	-	-	-	-	-	-	-	-	-	-	-	-	-	-	-	-	-
1	71653322	T	G	Apol7d	ENSMUSG00000073652	n.71653322T>G		intragenic_variant	1	-	-	-	-	-	-	-	-	-	-	-	-	-	-	-	-	-	-	-	-	-	-	-	-	-	-	-	-	-	-	-	-	-	-	-	-	-	-	-	-
1	73921823	T	C	Tns1	ENSMUST00000169786.7	c.4820A>G	p.Lys1607Arg	missense_variant	1	-	-	-	-	-	-	-	-	-	0.3465 (35/101)	-	-	-	-	-	-	-	-	-	-	-	-	-	-	-	-	-	-	-	-	-	-	-	-	-	-	-	-	-	-
1	74264350	T	A	Arpc2	ENSMUST00000006467.13	c.778-3T>A		splice_region_variant&intron_variant	1	-	-	-	-	-	-	-	-	-	-	-	-	-	-	-	-	-	-	-	-	-	-	-	-	-	-	-	-	-	-	-	-	-	-	-	-	-	-	-	-
1	74282444	T	A	Aamp	ENSMUST00000178235.7	c.507A>T	p.Glu169Asp	missense_variant	1	-	-	-	-	-	-	-	-	-	0.3894 (125/321)	-	-	-	-	-	-	-	-	-	-	-	-	-	-	-	-	-	-	-	-	-	-	-	-	-	-	-	-	-	-
1	74439443	G	GT	Usp37	ENSMUST00000189257.6	c.2887dupA	p.Thr963fs	frameshift_variant	1	-	-	-	-	-	-	-	-	-	-	-	-	-	-	-	-	-	-	-	-	-	-	-	-	-	-	-	-	-	-	-	-	-	-	-	-	-	-	-	-
1	74679913	T	G	Ttll4	ENSMUST00000042125.14	c.922T>G	p.Phe308Val	missense_variant	1	-	-	-	-	-	-	-	-	-	0.3864 (17/44)	-	-	-	-	-	-	-	-	-	-	-	-	-	-	-	-	-	-	-	-	-	-	-	-	-	-	-	-	-	-
1	75177761	A	C	Abcb6	ENSMUST00000027396.14	c.874T>G	p.Leu292Val	missense_variant	1	-	-	-	-	-	-	-	-	-	-	-	-	-	-	-	-	-	-	-	-	-	-	-	-	-	-	-	-	-	-	-	-	-	-	-	-	-	-	-	-
1	75177761	A	C	Gm29253	ENSMUST00000185727.1	n.3602T>G		non_coding_transcript_exon_variant	1	-	-	-	-	-	-	-	-	-	-	-	-	-	-	-	-	-	-	-	-	-	-	-	-	-	-	-	-	-	-	-	-	-	-	-	-	-	-	-	-
1	75200337	T	A	Glb1l	ENSMUST00000113623.7	c.1454A>T	p.Asp485Val	missense_variant	1	-	-	-	-	-	-	-	-	-	-	-	-	-	-	-	-	-	-	-	-	-	-	-	-	-	-	-	-	-	-	-	-	-	-	-	-	-	-	-	-
1	79799555	C	T	Serpine2	ENSMUST00000027467.10	c.986-1G>A		splice_acceptor_variant&intron_variant	1	-	-	-	-	-	-	-	-	-	-	-	-	-	-	-	-	-	-	-	-	-	-	-	-	-	-	-	-	-	-	-	-	-	-	-	-	-	-	-	-
1	80322907	C	G	Cul3	ENSMUST00000163119.7	c.216G>C	p.Lys72Asn	missense_variant	2	-	-	-	-	-	-	-	-	-	-	-	-	0.15 (9/60)	-	-	-	-	-	-	0.2519 (33/131)	-	-	-	-	-	-	-	-	-	-	-	-	-	-	-	-	-	-	-	-
1	85109350	C	T	A530032D15Rik	ENSMUST00000161724.7	c.19G>A	p.Glu7Lys	missense_variant	1	-	-	-	-	-	-	-	-	-	-	-	-	-	-	-	-	-	-	-	-	-	-	-	-	-	-	-	-	-	-	-	-	-	-	-	-	-	-	-	-
1	85109350	C	T	A530040E14Rik	ENSMUST00000162353.7	n.746-2459C>T		intron_variant	1	-	-	-	-	-	-	-	-	-	-	-	-	-	-	-	-	-	-	-	-	-	-	-	-	-	-	-	-	-	-	-	-	-	-	-	-	-	-	-	-
1	85109350	C	T	C130026I21Rik	ENSMUSG00000052477	n.85109350G>A		intragenic_variant	1	-	-	-	-	-	-	-	-	-	-	-	-	-	-	-	-	-	-	-	-	-	-	-	-	-	-	-	-	-	-	-	-	-	-	-	-	-	-	-	-
1	85610793	A	G	Sp140	ENSMUST00000080204.10	c.250A>G	p.Ile84Val	missense_variant	1	-	-	-	-	-	-	-	-	-	-	-	-	-	-	-	-	-	-	-	-	-	-	-	-	-	-	-	-	-	-	-	-	-	-	-	-	-	-	-	-
1	85610793	A	G	Gm10552	ENSMUST00000161763.1	n.251-491T>C		intron_variant	1	-	-	-	-	-	-	-	-	-	-	-	-	-	-	-	-	-	-	-	-	-	-	-	-	-	-	-	-	-	-	-	-	-	-	-	-	-	-	-	-
1	87990112	C	T	Usp40	ENSMUST00000187758.6	c.1012G>A	p.Glu338Lys	missense_variant	1	-	-	-	-	-	-	-	-	-	-	-	-	-	-	-	-	-	-	-	-	-	-	-	-	-	-	-	-	-	-	-	-	-	-	-	-	-	-	-	-
1	88056158	C	G	Ugt1a10	ENSMUST00000113142.9	c.677C>G	p.Thr226Ser	missense_variant	1	-	-	-	-	-	-	-	-	-	-	-	-	-	-	-	-	1.0 (12/12)	-	-	-	-	-	-	-	-	-	-	-	-	-	-	-	-	-	-	-	-	-	-	-
1	88056158	C	G	Gm20528	ENSMUSG00000092220	n.88056158G>C		intragenic_variant	1	-	-	-	-	-	-	-	-	-	-	-	-	-	-	-	-	1.0 (12/12)	-	-	-	-	-	-	-	-	-	-	-	-	-	-	-	-	-	-	-	-	-	-	-
1	88087880	T	A	Ugt1a8	ENSMUST00000113139.1	c.14T>A	p.Val5Asp	missense_variant	2	-	-	-	-	-	-	-	-	-	-	-	-	-	-	-	-	1.0 (12/12)	-	-	-	-	-	-	-	-	-	-	-	-	-	-	-	-	-	-	-	-	-	-	-
1	88087880	T	A	Ugt1a10	ENSMUST00000113142.9	c.855+31544T>A		intron_variant	2	-	-	-	-	-	-	-	-	-	-	-	-	-	-	-	-	1.0 (12/12)	-	-	-	-	-	-	-	-	-	-	-	-	-	-	-	-	-	-	-	-	-	-	-
1	88087880	T	A	Ugt1a9	ENSMUST00000073772.4	c.849+16202T>A		intron_variant	2	-	-	-	-	-	-	-	-	-	-	-	-	-	-	-	-	1.0 (12/12)	-	-	-	-	-	-	-	-	-	-	-	-	-	-	-	-	-	-	-	-	-	-	-
1	88087880	T	A	Gm20528	ENSMUSG00000092220	n.88087880A>T		intragenic_variant	2	-	-	-	-	-	-	-	-	-	-	-	-	-	-	-	-	1.0 (12/12)	-	-	-	-	-	-	-	-	-	-	-	-	-	-	-	-	-	-	-	-	-	-	-
1	88087881	T	C	Ugt1a8	ENSMUST00000113139.1	c.15T>C	p.Val5Val	synonymous_variant	2	-	-	-	-	-	-	-	-	-	-	-	-	-	-	-	-	1.0 (12/12)	-	-	-	-	-	-	-	-	-	-	-	-	-	-	-	-	-	-	-	-	-	-	-
1	88087881	T	C	Ugt1a10	ENSMUST00000113142.9	c.855+31545T>C		intron_variant	2	-	-	-	-	-	-	-	-	-	-	-	-	-	-	-	-	1.0 (12/12)	-	-	-	-	-	-	-	-	-	-	-	-	-	-	-	-	-	-	-	-	-	-	-
1	88087881	T	C	Ugt1a9	ENSMUST00000073772.4	c.849+16203T>C		intron_variant	2	-	-	-	-	-	-	-	-	-	-	-	-	-	-	-	-	1.0 (12/12)	-	-	-	-	-	-	-	-	-	-	-	-	-	-	-	-	-	-	-	-	-	-	-
1	88087881	T	C	Gm20528	ENSMUSG00000092220	n.88087881A>G		intragenic_variant	2	-	-	-	-	-	-	-	-	-	-	-	-	-	-	-	-	1.0 (12/12)	-	-	-	-	-	-	-	-	-	-	-	-	-	-	-	-	-	-	-	-	-	-	-
1	88201153	C	T	Ugt1a2	ENSMUST00000049289.8	c.517C>T	p.Arg173Cys	missense_variant	1	0.114 (31/272)	-	-	-	-	-	-	-	-	-	-	-	-	-	-	-	-	-	-	-	-	-	-	-	-	-	-	-	-	-	-	-	-	-	-	-	-	-	-	-
1	88201153	C	T	Ugt1a10	ENSMUST00000113142.9	c.856-13891C>T		intron_variant	1	0.114 (31/272)	-	-	-	-	-	-	-	-	-	-	-	-	-	-	-	-	-	-	-	-	-	-	-	-	-	-	-	-	-	-	-	-	-	-	-	-	-	-	-
1	88201153	C	T	Ugt1a9	ENSMUST00000073772.4	c.850-13891C>T		intron_variant	1	0.114 (31/272)	-	-	-	-	-	-	-	-	-	-	-	-	-	-	-	-	-	-	-	-	-	-	-	-	-	-	-	-	-	-	-	-	-	-	-	-	-	-	-
1	88201153	C	T	Ugt1a7c	ENSMUST00000058237.13	c.859-13891C>T		intron_variant	1	0.114 (31/272)	-	-	-	-	-	-	-	-	-	-	-	-	-	-	-	-	-	-	-	-	-	-	-	-	-	-	-	-	-	-	-	-	-	-	-	-	-	-	-
1	88201153	C	T	Ugt1a6a	ENSMUST00000014263.5	c.859-13891C>T		intron_variant	1	0.114 (31/272)	-	-	-	-	-	-	-	-	-	-	-	-	-	-	-	-	-	-	-	-	-	-	-	-	-	-	-	-	-	-	-	-	-	-	-	-	-	-	-
1	88201153	C	T	Ugt1a5	ENSMUST00000097659.4	c.853-13891C>T		intron_variant	1	0.114 (31/272)	-	-	-	-	-	-	-	-	-	-	-	-	-	-	-	-	-	-	-	-	-	-	-	-	-	-	-	-	-	-	-	-	-	-	-	-	-	-	-
1	88201153	C	T	Ugt1a6b	ENSMUST00000113137.1	c.859-13891C>T		intron_variant	1	0.114 (31/272)	-	-	-	-	-	-	-	-	-	-	-	-	-	-	-	-	-	-	-	-	-	-	-	-	-	-	-	-	-	-	-	-	-	-	-	-	-	-	-
1	88201153	C	T	Ugt1a8	ENSMUST00000113139.1	c.856-13891C>T		intron_variant	1	0.114 (31/272)	-	-	-	-	-	-	-	-	-	-	-	-	-	-	-	-	-	-	-	-	-	-	-	-	-	-	-	-	-	-	-	-	-	-	-	-	-	-	-
1	88201153	C	T	Gm20528	ENSMUSG00000092220	n.88201153G>A		intragenic_variant	1	0.114 (31/272)	-	-	-	-	-	-	-	-	-	-	-	-	-	-	-	-	-	-	-	-	-	-	-	-	-	-	-	-	-	-	-	-	-	-	-	-	-	-	-
1	88204911	C	CA	Dnajb3	ENSMUST00000119972.3	c.*38dupT		3_prime_UTR_variant	1	-	-	-	-	-	-	-	-	-	-	-	-	-	-	-	-	-	-	-	-	-	-	-	-	-	-	-	-	-	-	-	-	-	-	-	-	-	-	-	-
1	88204911	C	CA	Ugt1a10	ENSMUST00000113142.9	c.856-10127dupA		intron_variant	1	-	-	-	-	-	-	-	-	-	-	-	-	-	-	-	-	-	-	-	-	-	-	-	-	-	-	-	-	-	-	-	-	-	-	-	-	-	-	-	-
1	88204911	C	CA	Ugt1a9	ENSMUST00000073772.4	c.850-10127dupA		intron_variant	1	-	-	-	-	-	-	-	-	-	-	-	-	-	-	-	-	-	-	-	-	-	-	-	-	-	-	-	-	-	-	-	-	-	-	-	-	-	-	-	-
1	88204911	C	CA	Ugt1a7c	ENSMUST00000058237.13	c.859-10127dupA		intron_variant	1	-	-	-	-	-	-	-	-	-	-	-	-	-	-	-	-	-	-	-	-	-	-	-	-	-	-	-	-	-	-	-	-	-	-	-	-	-	-	-	-
1	88204911	C	CA	Ugt1a6a	ENSMUST00000014263.5	c.859-10127dupA		intron_variant	1	-	-	-	-	-	-	-	-	-	-	-	-	-	-	-	-	-	-	-	-	-	-	-	-	-	-	-	-	-	-	-	-	-	-	-	-	-	-	-	-
1	88204911	C	CA	Ugt1a5	ENSMUST00000097659.4	c.853-10127dupA		intron_variant	1	-	-	-	-	-	-	-	-	-	-	-	-	-	-	-	-	-	-	-	-	-	-	-	-	-	-	-	-	-	-	-	-	-	-	-	-	-	-	-	-
1	88204911	C	CA	Ugt1a2	ENSMUST00000049289.8	c.864+3417dupA		intron_variant	1	-	-	-	-	-	-	-	-	-	-	-	-	-	-	-	-	-	-	-	-	-	-	-	-	-	-	-	-	-	-	-	-	-	-	-	-	-	-	-	-
1	88204911	C	CA	Ugt1a6b	ENSMUST00000113137.1	c.859-10127dupA		intron_variant	1	-	-	-	-	-	-	-	-	-	-	-	-	-	-	-	-	-	-	-	-	-	-	-	-	-	-	-	-	-	-	-	-	-	-	-	-	-	-	-	-
1	88204911	C	CA	Ugt1a8	ENSMUST00000113139.1	c.856-10127dupA		intron_variant	1	-	-	-	-	-	-	-	-	-	-	-	-	-	-	-	-	-	-	-	-	-	-	-	-	-	-	-	-	-	-	-	-	-	-	-	-	-	-	-	-
1	88204911	C	CA	Gm20528	ENSMUSG00000092220	n.88204912dupT		intragenic_variant	1	-	-	-	-	-	-	-	-	-	-	-	-	-	-	-	-	-	-	-	-	-	-	-	-	-	-	-	-	-	-	-	-	-	-	-	-	-	-	-	-
1	88270300	C	CTAG	Hjurp	ENSMUST00000054674.14	c.257-4_257-2dupCTA		splice_acceptor_variant&intron_variant	1	-	-	-	-	-	-	-	-	-	-	-	-	-	-	-	-	-	-	-	-	-	-	-	-	-	-	-	-	-	-	-	-	-	-	-	-	-	-	-	-
1	88701499	T	C	Arl4c	ENSMUST00000051236.10	c.166A>G	p.Asn56Asp	missense_variant	2	-	-	-	-	-	-	-	-	-	-	-	-	-	-	-	-	-	-	-	-	-	-	-	-	-	-	-	-	-	-	-	-	-	-	-	0.3776 (37/98)	-	-	-	-
1	90612272	A	T	Cops8	ENSMUST00000036153.11	c.*19A>T		3_prime_UTR_variant	1	-	-	-	-	-	-	-	-	-	0.5149 (121/235)	-	-	-	-	-	-	-	-	-	-	-	-	-	-	-	-	-	-	-	-	-	-	-	-	-	-	-	-	-	-
1	90828121	T	G	Col6a3	ENSMUST00000056925.15	c.445A>C	p.Thr149Pro	missense_variant	1	-	-	-	-	-	-	-	-	-	0.5 (9/18)	-	-	-	-	-	-	-	-	-	-	-	-	-	-	-	-	-	-	-	-	-	-	-	-	-	-	-	-	-	-
1	91527787	G	A	Traf3ip1	ENSMUST00000189341.6	c.*4G>A		3_prime_UTR_variant	1	-	-	-	-	-	-	-	-	-	-	-	-	-	-	-	-	-	-	-	-	-	-	-	-	-	-	-	-	-	-	-	-	-	-	-	-	-	-	-	-
1	93039056	C	T	Kif1a	ENSMUST00000190723.6	c.3880G>A	p.Glu1294Lys	missense_variant	1	-	-	-	-	-	-	-	-	-	-	-	-	-	-	-	-	-	-	-	-	-	-	-	-	-	-	-	-	-	-	-	-	-	-	-	-	-	-	-	-
1	93489113	T	A	2017-09-02	ENSMUST00000027495.14	c.-22-11T>A		intron_variant	1	-	-	-	-	-	-	-	-	-	-	-	-	-	-	-	-	-	-	-	-	-	-	-	-	-	-	-	-	-	-	-	-	-	-	-	-	-	-	-	-
1	94024620	T	C	Neu4	ENSMUST00000190212.6	c.710T>C	p.Leu237Pro	missense_variant	1	-	-	-	-	-	-	-	-	-	-	-	-	-	-	-	-	-	-	-	-	-	-	-	-	-	-	-	-	-	-	-	-	-	-	-	-	-	-	-	-
1	97707623	G	C	Ppip5k2	ENSMUST00000112845.7	c.*95C>G		3_prime_UTR_variant	2	-	-	-	-	-	-	-	-	-	-	-	-	-	-	-	-	-	-	-	-	-	-	-	-	-	-	-	-	-	-	-	-	-	-	-	-	-	-	-	-
1	98507554	G	A	Slco6d1	ENSMUST00000027575.12	c.1993G>A	p.Gly665Arg	missense_variant	1	-	-	-	-	-	-	-	-	-	-	-	-	-	-	-	-	-	-	-	-	-	-	-	-	-	-	-	-	-	-	-	-	-	-	-	-	-	-	-	-
1	107435364	A	G	Serpinb7	ENSMUST00000086690.5	c.257A>G	p.Asp86Gly	missense_variant	1	-	-	-	-	-	-	-	-	-	-	-	-	-	-	-	-	-	-	-	-	-	-	-	-	-	-	-	-	-	-	-	-	-	-	-	-	-	-	-	-
1	111863360	G	GT	Dsel	ENSMUST00000035462.6	c.-558dupA		5_prime_UTR_variant	1	-	-	-	-	-	-	-	-	-	-	-	-	-	-	-	-	-	-	-	-	-	-	-	-	-	-	-	-	-	-	-	-	-	-	-	-	-	-	-	-
1	118836851	T	C	Gli2	ENSMUST00000062483.14	c.3569A>G	p.His1190Arg	missense_variant	1	-	-	-	-	-	-	-	-	-	-	-	-	-	-	-	-	-	-	-	-	-	-	-	-	-	-	-	-	-	-	-	-	-	-	-	-	-	-	-	-
1	121527934	C	T	Htr5b	ENSMUST00000055884.7	c.256G>A	p.Val86Met	missense_variant	1	-	-	-	-	-	-	-	-	-	-	-	-	-	-	-	-	-	-	-	-	-	-	-	-	-	-	-	-	-	-	-	-	-	-	-	-	-	-	-	-
1	130180355	G	A	Thsd7b	ENSMUST00000073527.12	c.3806G>A	p.Arg1269His	missense_variant	1	-	-	-	-	-	-	-	-	-	-	-	-	-	-	-	-	-	-	-	-	-	-	-	-	-	-	-	-	-	-	-	-	-	-	-	-	-	-	-	-
1	130180490	A	T	Thsd7b	ENSMUST00000073527.12	c.3941A>T	p.Lys1314Ile	missense_variant	1	-	-	-	-	-	-	-	-	-	-	-	-	-	-	-	-	-	-	-	-	-	-	-	-	-	-	-	-	-	-	-	-	-	-	-	-	-	-	-	-
1	130190110	T	A	Thsd7b	ENSMUST00000073527.12	c.4283-21T>A		intron_variant	1	-	-	-	-	-	-	-	-	-	-	-	-	-	-	-	-	-	-	-	-	-	-	-	-	-	-	-	-	-	-	-	-	-	-	-	-	-	-	-	-
1	131530680	A	T	Fam72a	ENSMUST00000068613.4	c.179A>T	p.Tyr60Phe	missense_variant	1	-	-	-	-	-	-	-	-	-	-	-	-	-	-	-	-	-	-	-	-	-	-	-	-	-	-	-	-	-	-	-	-	-	-	-	-	-	-	-	-
1	131663456	T	G	Ctse	ENSMUST00000073350.12	c.346+28T>G		intron_variant	1	-	-	-	-	-	-	-	-	-	-	-	-	-	-	-	-	-	-	-	-	-	-	-	-	-	-	-	-	-	-	-	-	-	-	-	-	-	-	-	-
1	131802306	C	T	Pm20d1	ENSMUST00000048660.11	c.582C>T	p.Ser194Ser	synonymous_variant	1	-	-	-	-	-	-	-	-	-	-	-	-	-	-	-	-	-	-	-	-	-	-	-	-	-	-	-	-	-	-	-	-	-	-	-	-	-	-	-	-
1	133093811	T	C	Pik3c2b	ENSMUST00000077730.6	c.3376+26T>C		intron_variant	1	-	-	-	-	-	0.5 (14/28)	-	-	-	-	-	-	-	-	-	-	-	-	-	-	-	-	-	-	-	-	-	-	-	-	-	-	-	-	-	-	-	-	-	-
1	133736643	G	GT	Atp2b4	ENSMUST00000143567.7	c.912dupA	p.Gln305fs	frameshift_variant	1	-	-	-	-	-	-	-	-	-	-	-	-	-	-	-	-	-	-	-	-	-	-	-	-	-	-	-	-	-	-	-	-	-	-	-	-	-	-	-	-
1	134771968	C	T	Ppp1r12b	ENSMUST00000086444.5	c.2844+30G>A		intron_variant	1	0.1039 (8/77)	-	-	-	-	-	-	-	-	-	-	-	-	-	-	-	-	-	-	-	-	-	-	-	-	-	-	-	-	-	-	-	-	-	-	-	-	-	-	-
1	135027170	CGGT	C	Lgr6	ENSMUST00000044828.13	c.523_525delACC	p.Thr175del	conservative_inframe_deletion	2	-	-	-	-	-	-	-	-	-	-	-	-	-	-	-	-	-	-	-	-	-	-	-	-	-	-	-	-	-	-	-	-	-	-	-	-	-	-	-	-
1	135371887	C	CA	Shisa4	ENSMUST00000041240.3	c.*62dupT		3_prime_UTR_variant	1	-	-	-	-	-	-	-	-	-	-	-	-	-	-	-	-	-	-	-	-	-	-	-	-	-	-	-	-	-	-	-	-	-	-	-	-	-	-	-	-
1	135371887	C	CAA	Shisa4	ENSMUST00000041240.3	c.*61_*62dupTT		3_prime_UTR_variant	1	-	-	-	-	-	-	-	-	-	-	-	-	-	-	-	-	-	-	-	-	-	-	-	-	-	-	-	-	-	-	-	-	-	-	-	-	-	-	-	-
1	135877089	C	A	Pkp1	ENSMUST00000027667.12	c.2094G>T	p.Leu698Leu	synonymous_variant	1	-	-	-	-	-	-	-	-	-	-	-	-	-	-	-	-	-	-	-	-	-	-	-	-	-	-	-	-	-	-	-	-	-	-	-	-	-	-	-	-
1	139930849	A	G	Gm16332	ENSMUST00000134229.2	n.265T>C		non_coding_transcript_exon_variant	1	-	-	-	-	-	-	-	-	0.3707 (43/116)	-	-	-	-	-	-	-	-	-	-	-	-	-	-	-	-	-	-	-	-	-	-	-	-	-	-	-	-	-	-	-
1	140143935	A	T	Cfh	ENSMUST00000111976.8	c.1014T>A	p.Cys338*	stop_gained	1	-	-	-	-	-	-	-	-	-	-	-	-	-	-	-	-	-	-	-	-	-	-	-	-	-	-	-	-	-	-	-	-	-	-	-	-	-	-	-	-
1	150454459	T	G	Prg4	ENSMUST00000161611.7	c.2462A>C	p.Asp821Ala	missense_variant	1	-	-	-	-	-	-	-	-	-	-	-	-	-	-	-	-	-	-	-	-	-	-	-	-	-	-	-	-	-	-	-	-	-	-	-	-	-	-	-	-
1	150454460	C	A	Prg4	ENSMUST00000161611.7	c.2461G>T	p.Asp821Tyr	missense_variant	1	-	-	-	-	-	-	-	-	-	-	-	-	-	-	-	-	-	-	-	-	-	-	-	-	-	-	-	-	-	-	-	-	-	-	-	-	-	-	-	-
1	153807706	A	T	Rgsl1	ENSMUST00000124558.9	c.2097T>A	p.Thr699Thr	synonymous_variant	1	-	-	-	-	-	-	-	-	-	-	-	-	-	-	-	-	-	-	-	-	-	-	-	-	-	-	-	-	-	-	-	-	-	-	-	-	-	-	-	-
1	154398615	G	A	Cacna1e	ENSMUST00000187541.6	c.6600C>T	p.His2200His	synonymous_variant	1	-	-	-	-	-	-	-	-	-	-	-	-	-	-	-	-	-	-	-	-	-	-	-	-	-	-	-	-	-	-	-	-	-	-	-	-	-	-	-	-
1	155132603	T	G	Mr1	ENSMUST00000027744.9	c.625A>C	p.Thr209Pro	missense_variant	1	-	-	-	-	-	-	-	-	-	-	-	-	-	-	-	-	-	-	-	-	-	-	-	-	-	-	-	-	-	-	-	-	-	-	0.2381 (5/21)	-	-	-	-	-
1	155193280	A	C	Stx6	ENSMUST00000027743.12	c.551A>C	p.Lys184Thr	missense_variant	1	-	-	-	-	-	-	-	-	-	-	-	-	-	-	-	-	-	-	-	-	-	-	-	-	-	-	-	-	-	-	-	-	-	-	0.122 (15/123)	-	-	-	-	-
1	155783457	C	T	Qsox1	ENSMUST00000035325.14	c.1095G>A	p.Gln365Gln	synonymous_variant	1	-	-	-	-	-	-	-	-	-	-	-	-	-	-	-	-	-	-	-	-	-	-	-	-	-	-	-	-	-	-	-	-	-	-	-	-	-	-	-	-
1	155861969	G	GT	Cep350	ENSMUST00000138762.7	c.8126dupA	p.Asn2709fs	frameshift_variant	1	-	-	-	-	-	-	-	-	-	-	-	-	-	-	-	-	-	-	-	-	-	-	-	-	-	-	-	-	-	-	-	-	-	-	-	-	-	-	-	-
1	156007010	T	C	Tor1aip1	ENSMUST00000097527.9	c.1646A>G	p.Lys549Arg	missense_variant	1	-	-	-	-	-	-	-	-	-	-	-	-	-	-	-	-	0.1564 (33/211)	-	-	-	-	-	-	-	-	-	-	-	-	-	-	-	-	-	-	-	-	-	-	-
1	157175978	C	CT	Rasal2	ENSMUST00000078308.12	c.1163dupA	p.Asp389fs	frameshift_variant	1	-	-	-	-	-	-	-	-	-	-	-	-	-	-	-	-	-	0.3846 (5/13)	-	-	-	-	-	-	-	-	-	-	-	-	-	-	-	-	-	-	-	-	-	-
1	159884853	C	A	Tnr	ENSMUST00000111669.8	c.2046C>A	p.Ala682Ala	synonymous_variant	1	-	-	-	-	-	-	-	-	-	-	-	-	-	-	-	-	-	-	-	-	-	-	-	-	-	-	-	-	-	-	-	-	-	-	-	-	-	-	-	-
1	160993435	C	A	Serpinc1	ENSMUST00000064725.10	c.451C>A	p.Gln151Lys	missense_variant	1	-	-	-	-	-	-	-	-	-	-	-	-	-	-	-	-	-	-	-	-	-	-	-	-	-	-	-	-	-	-	-	-	-	-	-	-	-	-	-	-
1	161972887	G	GA	4930558K02Rik	ENSMUST00000162676.1	c.22-4892dupT		intron_variant	1	-	-	-	-	-	-	-	-	-	-	-	-	-	-	-	-	-	-	-	-	-	-	-	-	-	-	-	-	-	-	-	-	-	-	-	-	-	-	-	-
1	161972887	G	GA	Gm38304	ENSMUST00000161826.1	n.80+3614dupA		intron_variant	1	-	-	-	-	-	-	-	-	-	-	-	-	-	-	-	-	-	-	-	-	-	-	-	-	-	-	-	-	-	-	-	-	-	-	-	-	-	-	-	-
1	161972887	G	GA	Pigc	ENSMUSG00000026698	n.161972893dupA		intragenic_variant	1	-	-	-	-	-	-	-	-	-	-	-	-	-	-	-	-	-	-	-	-	-	-	-	-	-	-	-	-	-	-	-	-	-	-	-	-	-	-	-	-
1	164278288	G	GA	Ccdc181	ENSMUST00000027867.6	c.97dupA	p.Ser33fs	frameshift_variant	1	-	-	-	-	-	-	-	-	-	-	-	-	-	-	-	-	-	-	-	-	-	-	-	-	-	-	-	-	-	-	-	-	-	-	-	-	-	-	-	-
1	170301325	T	C	Gm7694	ENSMUST00000179801.2	c.634A>G	p.Lys212Glu	missense_variant	1	-	-	-	-	-	-	-	-	-	-	-	-	-	-	-	-	-	-	-	-	-	-	-	-	-	-	-	-	-	-	-	-	-	-	-	-	-	-	-	-
1	171252620	G	C	Adamts4	ENSMUST00000111315.7	c.741G>C	p.Lys247Asn	missense_variant	2	-	-	-	-	-	-	-	-	-	-	-	-	-	-	-	-	-	-	-	-	-	-	-	-	-	-	-	-	-	-	-	-	-	-	-	-	-	-	-	-
1	171276365	C	T	B4galt3	ENSMUST00000064272.9	c.1174C>T	p.Arg392Cys	missense_variant	2	-	-	-	-	-	-	-	-	-	-	-	-	-	-	-	-	-	-	-	-	-	-	-	-	-	-	-	-	-	-	-	-	-	-	-	-	-	-	-	-
1	171276365	C	T	Ppox	ENSMUSG00000062729	n.171276365G>A		intragenic_variant	2	-	-	-	-	-	-	-	-	-	-	-	-	-	-	-	-	-	-	-	-	-	-	-	-	-	-	-	-	-	-	-	-	-	-	-	-	-	-	-	-
1	171279495	A	T	Ppox	ENSMUST00000073120.10	c.551T>A	p.Phe184Tyr	missense_variant	1	-	-	-	-	-	-	-	-	-	-	-	-	-	-	-	-	-	-	-	-	-	-	-	-	-	-	-	-	-	-	-	-	-	-	-	-	-	-	-	-
1	171285282	C	T	Usp21	ENSMUST00000111306.9	c.763G>A	p.Gly255Arg	missense_variant	1	-	-	-	-	-	-	-	-	-	-	-	-	-	-	-	-	-	-	-	-	-	-	-	-	-	-	-	-	-	-	-	-	-	-	-	-	-	-	-	-
1	171340759	T	C	Dedd	ENSMUST00000064950.10	c.581-69T>C		intron_variant	1	-	-	-	-	-	-	-	-	-	-	-	-	-	-	-	-	-	-	-	-	-	-	-	-	-	0.1667 (4/24)	-	-	-	-	-	-	-	-	-	-	-	-	-	-
1	171340759	T	C	Nit1	ENSMUSG00000013997	n.171340759A>G		intragenic_variant	1	-	-	-	-	-	-	-	-	-	-	-	-	-	-	-	-	-	-	-	-	-	-	-	-	-	0.1667 (4/24)	-	-	-	-	-	-	-	-	-	-	-	-	-	-
1	171358905	A	G	Klhdc9	ENSMUST00000061878.4	c.962T>C	p.Leu321Pro	missense_variant	1	-	-	-	-	-	-	-	-	-	-	-	-	-	-	-	-	-	-	-	-	-	-	-	-	-	-	-	-	-	-	-	-	-	-	-	-	-	-	-	-
1	171358905	A	G	Pfdn2	ENSMUST00000135941.7	c.*879A>G		3_prime_UTR_variant	1	-	-	-	-	-	-	-	-	-	-	-	-	-	-	-	-	-	-	-	-	-	-	-	-	-	-	-	-	-	-	-	-	-	-	-	-	-	-	-	-
1	171597679	T	C	Ly9	ENSMUST00000068878.13	c.1438+5A>G		splice_region_variant&intron_variant	1	-	-	-	-	-	-	-	-	-	-	-	-	-	-	-	-	-	-	-	-	-	-	-	-	-	-	-	-	-	-	-	-	-	0.2623 (16/61)	-	-	-	-	-	-
1	171597679	T	C	Cd244	ENSMUSG00000004709	n.171597679T>C		intragenic_variant	1	-	-	-	-	-	-	-	-	-	-	-	-	-	-	-	-	-	-	-	-	-	-	-	-	-	-	-	-	-	-	-	-	-	0.2623 (16/61)	-	-	-	-	-	-
1	172380106	T	TA	Pigm	ENSMUST00000052455.3	c.*2145dupA		3_prime_UTR_variant	1	-	-	-	-	-	-	-	-	-	-	-	-	-	-	-	-	-	-	-	-	-	-	-	-	-	-	-	-	-	-	-	-	-	-	-	-	-	-	-	-
1	172505778	T	C	Tagln2	ENSMUST00000111228.1	c.198T>C	p.Ile66Ile	synonymous_variant	1	-	-	-	-	-	0.3125 (5/16)	-	-	-	-	-	-	-	-	-	-	-	-	-	-	-	-	-	-	-	-	-	-	-	-	-	-	-	-	-	-	-	-	-	-
1	172599086	T	TC	Fcrl6	ENSMUST00000094303.5	c.291dupG	p.Lys98fs	frameshift_variant	1	-	-	-	-	-	-	-	0.2024 (17/84)	-	-	-	-	-	-	-	-	-	-	-	-	-	-	-	-	-	-	-	-	-	-	-	-	-	-	-	-	-	-	-	-
1	173338191	A	C	Cadm3	ENSMUST00000005470.4	c.1049-46T>G		intron_variant	1	-	-	-	-	-	-	-	-	-	-	-	-	-	-	-	-	-	-	-	-	-	-	-	-	-	-	-	-	-	-	-	-	-	0.3269 (17/52)	-	-	-	-	-	-
1	173521556	T	C	BC094916	ENSMUST00000090406.5	c.*162A>G		3_prime_UTR_variant	2	-	-	-	-	-	-	-	-	-	-	-	-	-	-	-	-	-	-	-	-	-	-	-	-	-	-	-	-	-	-	-	-	-	-	-	-	-	-	-	-
1	173589546	A	T	Pydc4	ENSMUST00000150649.7	c.1299T>A	p.Ser433Arg	missense_variant	2	-	-	-	-	-	-	-	-	-	-	-	-	-	-	-	-	-	-	-	-	-	-	-	-	-	-	-	-	-	-	-	-	-	-	-	-	-	-	-	-
1	173589572	C	G	Pydc4	ENSMUST00000150649.7	c.1273G>C	p.Val425Leu	missense_variant	1	-	-	-	-	-	-	-	-	-	-	-	-	-	-	-	-	-	-	-	-	-	-	-	-	-	-	-	-	-	-	-	-	-	-	-	-	-	-	-	-
1	173589577	G	A	Pydc4	ENSMUST00000150649.7	c.1268C>T	p.Pro423Leu	missense_variant	1	-	-	-	-	-	-	-	-	-	-	-	-	-	-	-	-	-	-	-	-	-	-	-	-	-	-	-	-	-	-	-	-	-	-	-	-	-	-	-	-
1	173589611	C	G	Pydc4	ENSMUST00000150649.7	c.1234G>C	p.Ala412Pro	missense_variant	1	-	-	-	-	-	-	-	-	-	-	-	-	-	-	-	-	-	-	-	-	-	-	-	-	-	-	-	-	-	-	-	-	-	-	-	-	-	-	-	-
1	173683489	T	G	Pydc3	ENSMUST00000085876.10	c.1209T>G	p.His403Gln	missense_variant	1	-	-	-	-	-	-	-	-	-	-	-	-	-	-	-	-	-	-	-	-	-	-	-	-	-	-	-	-	-	-	-	-	-	-	-	-	-	-	-	-
1	173683491	C	G	Pydc3	ENSMUST00000085876.10	c.1211C>G	p.Ala404Gly	missense_variant	1	-	-	-	-	-	-	-	-	-	-	-	-	-	-	-	-	-	-	-	-	-	-	-	-	-	-	-	-	-	-	-	-	-	-	-	-	-	-	-	-
1	173727685	T	A	AI607873	ENSMUST00000042610.13	c.2451A>T	p.Thr817Thr	synonymous_variant	1	-	-	-	-	-	-	-	-	-	-	-	-	-	-	-	-	-	-	-	-	-	-	-	-	-	-	-	-	-	-	-	-	-	-	-	-	-	-	-	-
1	173735121	G	T	AI607873	ENSMUST00000042610.13	c.458C>A	p.Ala153Asp	missense_variant	4	-	0.3077 (4/13)	-	-	-	-	-	-	-	-	-	-	-	-	-	-	-	-	-	-	-	-	-	-	-	-	-	-	-	-	-	-	-	-	-	-	-	-	-	-
1	173735126	G	A	AI607873	ENSMUST00000042610.13	c.453C>T	p.Ser151Ser	synonymous_variant	1	-	-	-	-	-	-	-	-	-	-	-	-	-	-	-	-	-	-	-	-	-	-	-	-	-	-	-	-	-	-	-	-	-	-	-	-	-	-	-	-
1	173735295	A	T	AI607873	ENSMUST00000042610.13	c.284T>A	p.Leu95Gln	missense_variant	1	-	-	-	-	-	-	-	-	-	-	-	-	-	-	-	-	-	-	-	-	-	-	-	-	-	-	-	-	-	-	-	-	-	-	-	-	-	-	-	-
1	173796944	T	C	Gm16340	ENSMUST00000155076.1	n.511-2A>G		splice_acceptor_variant&intron_variant	1	-	-	-	-	-	-	-	-	-	-	-	-	-	-	-	-	-	-	-	-	-	-	-	-	-	-	-	-	-	-	-	-	-	-	-	-	-	-	-	-
1	173798128	T	C	Gm16340	ENSMUST00000155076.1	n.392A>G		non_coding_transcript_exon_variant	1	-	-	-	-	-	-	-	-	-	0.2667 (4/15)	-	-	-	-	-	-	-	-	-	-	-	-	-	-	-	-	-	-	-	-	-	-	-	-	-	-	-	-	-	-
1	173798172	G	A	Gm16340	ENSMUST00000155076.1	n.348C>T		non_coding_transcript_exon_variant	1	-	-	-	-	-	-	-	-	-	0.4167 (5/12)	-	-	-	-	-	-	-	-	-	-	-	-	-	-	-	-	-	-	-	-	-	-	-	-	-	-	-	-	-	-
1	173862875	T	G	Mndal	ENSMUST00000111210.8	c.888A>C	p.Lys296Asn	missense_variant	1	-	-	-	-	-	-	-	-	-	0.1458 (14/96)	-	-	-	-	-	-	-	-	-	-	-	-	-	-	-	-	-	-	-	-	-	-	-	-	-	-	-	-	-	-
1	173865469	G	T	Mndal	ENSMUST00000111210.8	c.809C>A	p.Pro270His	missense_variant	1	-	-	-	-	-	-	-	-	-	-	-	-	-	-	-	-	-	-	-	-	-	-	-	-	-	-	-	-	-	-	-	-	-	-	-	-	-	-	-	-
1	173865480	A	G	Mndal	ENSMUST00000111210.8	c.798T>C	p.Cys266Cys	synonymous_variant	1	-	-	-	-	-	-	-	-	-	-	-	-	-	-	-	-	-	-	-	-	-	-	-	-	-	-	-	-	-	-	-	-	-	-	-	-	-	-	-	-
1	173906156	A	T	Mnda	ENSMUST00000009340.9	c.438T>A	p.Ala146Ala	synonymous_variant	1	-	-	-	-	-	-	-	-	-	-	-	-	-	-	-	-	-	-	-	-	-	-	-	-	-	-	-	-	-	-	-	-	-	-	-	-	-	-	-	-
1	173906156	A	T	Mndal	ENSMUST00000111210.8	c.-89-26166T>A		intron_variant	1	-	-	-	-	-	-	-	-	-	-	-	-	-	-	-	-	-	-	-	-	-	-	-	-	-	-	-	-	-	-	-	-	-	-	-	-	-	-	-	-
1	173906157	G	T	Mnda	ENSMUST00000009340.9	c.437C>A	p.Ala146Asp	missense_variant	1	-	-	-	-	-	-	-	-	-	-	-	-	-	-	-	-	-	-	-	-	-	-	-	-	-	-	-	-	-	-	-	-	-	-	-	-	-	-	-	-
1	173906157	G	T	Mndal	ENSMUST00000111210.8	c.-89-26167C>A		intron_variant	1	-	-	-	-	-	-	-	-	-	-	-	-	-	-	-	-	-	-	-	-	-	-	-	-	-	-	-	-	-	-	-	-	-	-	-	-	-	-	-	-
1	173906162	G	A	Mnda	ENSMUST00000009340.9	c.432C>T	p.Ser144Ser	synonymous_variant	1	-	-	-	-	-	-	-	-	-	-	-	-	-	-	-	-	-	-	-	-	-	-	-	-	-	-	-	-	-	-	-	-	-	-	-	-	-	-	-	-
1	173906162	G	A	Mndal	ENSMUST00000111210.8	c.-89-26172C>T		intron_variant	1	-	-	-	-	-	-	-	-	-	-	-	-	-	-	-	-	-	-	-	-	-	-	-	-	-	-	-	-	-	-	-	-	-	-	-	-	-	-	-	-
1	173906310	A	T	Mnda	ENSMUST00000009340.9	c.284T>A	p.Leu95Gln	missense_variant	3	-	-	-	-	-	-	-	-	-	-	-	-	-	-	-	-	-	-	-	-	-	-	-	-	-	-	-	-	-	-	-	-	-	-	-	-	-	-	-	-
1	173906310	A	T	Mndal	ENSMUST00000111210.8	c.-89-26320T>A		intron_variant	3	-	-	-	-	-	-	-	-	-	-	-	-	-	-	-	-	-	-	-	-	-	-	-	-	-	-	-	-	-	-	-	-	-	-	-	-	-	-	-	-
1	174027237	T	C	Ifi205	ENSMUST00000059226.6	c.355A>G	p.Arg119Gly	missense_variant	1	-	-	-	-	-	-	-	-	-	-	-	-	-	-	-	-	-	-	-	-	-	-	-	-	-	-	-	-	-	-	-	-	-	-	-	-	-	-	-	-
1	174027244	T	A	Ifi205	ENSMUST00000059226.6	c.348A>T	p.Ala116Ala	synonymous_variant	2	-	-	-	-	-	-	-	-	-	-	-	-	-	-	-	-	-	-	-	-	-	-	-	-	-	-	-	-	-	-	-	-	-	-	-	-	-	-	-	-
1	174027308	A	T	Ifi205	ENSMUST00000059226.6	c.284T>A	p.Leu95Gln	missense_variant	1	-	-	-	-	-	-	-	-	-	-	-	-	-	-	-	-	-	-	-	-	-	-	-	-	-	-	-	-	-	-	-	-	-	-	-	-	-	-	-	-
1	174069559	G	C	Olfr430	ENSMUST00000055873.6	c.260G>C	p.Ser87Thr	missense_variant	1	-	-	-	-	-	-	-	-	-	-	-	-	-	-	-	-	-	-	-	-	-	-	-	-	-	-	-	-	-	-	-	-	-	-	-	-	-	-	-	-
1	174821211	G	T	Fmn2	ENSMUST00000030039.12	c.4711-8G>T		splice_region_variant&intron_variant	1	-	-	-	-	-	-	-	-	-	-	-	-	-	-	-	-	-	-	-	-	-	-	-	-	-	-	-	-	-	-	-	-	-	-	-	-	-	-	-	-
1	178116290	GAA	G	Gm16432	ENSMUST00000192146.1	c.2175+23_2175+24delAA		intron_variant	1	-	-	-	-	-	-	-	-	-	-	-	-	-	-	-	-	-	-	-	-	-	-	-	-	-	-	-	-	-	-	-	-	-	-	-	-	-	-	-	-
1	179681513	C	G	Sccpdh	ENSMUST00000040538.9	c.894C>G	p.Phe298Leu	missense_variant	1	-	-	-	-	-	-	-	-	-	0.4615 (24/52)	-	-	-	-	-	-	-	-	-	-	-	-	-	-	-	-	-	-	-	-	-	-	-	-	-	-	-	-	-	-
1	179752858	T	G	Ahctf1	ENSMUST00000027768.13	c.5778A>C	p.Glu1926Asp	missense_variant	1	-	-	-	-	-	-	-	-	-	-	-	-	-	-	-	-	-	-	-	-	-	-	-	-	-	-	-	-	-	-	-	-	-	-	-	-	-	-	-	-
1	179753182	C	T	Ahctf1	ENSMUST00000027768.13	c.5454G>A	p.Glu1818Glu	synonymous_variant	2	-	-	-	-	-	-	-	-	-	-	-	-	-	-	-	-	-	-	-	-	-	-	-	-	-	-	-	-	-	-	-	-	-	-	-	-	-	-	-	-
1	179755497	T	G	Ahctf1	ENSMUST00000027768.13	c.4515A>C	p.Glu1505Asp	missense_variant	1	-	-	-	-	-	-	-	-	-	-	-	-	-	-	-	-	-	-	-	-	-	-	-	-	-	-	-	-	-	-	-	-	-	-	0.2909 (16/55)	-	-	-	-	-
1	181747224	G	C	Dnah14	ENSMUST00000208001.1	c.8902G>C	p.Asp2968His	missense_variant	1	-	-	-	-	-	-	-	-	-	-	-	-	-	-	-	-	-	-	-	-	-	-	-	-	-	-	-	-	-	-	-	-	-	-	-	-	-	-	-	-
1	181819965	G	T	Lbr	ENSMUST00000005003.11	c.1246C>A	p.Leu416Met	missense_variant	1	-	-	-	-	-	-	-	-	-	-	-	-	-	-	-	-	-	-	-	-	-	-	-	-	-	-	-	-	-	-	-	-	-	-	-	-	-	-	-	-
1	181919549	G	A	Enah	ENSMUST00000078719.12	c.1696C>T	p.Pro566Ser	missense_variant	1	-	-	-	-	0.5714 (16/28)	-	-	-	-	-	-	-	-	-	-	-	-	-	-	-	-	-	-	-	-	-	-	-	-	-	-	-	-	-	-	-	-	-	-	-
1	182482530	A	T	Capn2	ENSMUST00000068505.9	c.1317+6T>A		splice_region_variant&intron_variant	1	-	-	-	-	-	-	-	-	-	-	-	-	-	-	-	0.3333 (4/12)	-	-	-	-	-	-	-	-	-	-	-	-	-	-	-	-	-	-	-	-	-	-	-	-
1	186630721	G	GT	Tgfb2	ENSMUST00000195201.1	c.904dupA	p.Thr302fs	frameshift_variant	1	-	-	-	-	-	-	-	-	-	-	-	-	-	-	-	-	-	0.1 (4/40)	-	-	-	-	-	-	-	-	-	-	-	-	-	-	-	-	-	-	-	-	-	-
1	188626635	C	A	Ush2a	ENSMUST00000060479.13	c.6357C>A	p.Cys2119*	stop_gained	1	-	-	-	-	-	-	-	-	-	-	-	-	-	-	-	-	-	-	-	-	-	-	-	-	-	-	-	-	-	-	-	-	-	-	-	-	-	0.3086 (25/81)	-	-
1	190800037	G	GT	Rps6kc1	ENSMUST00000061611.14	c.1766dupA	p.Asn589fs	frameshift_variant	1	-	-	-	-	-	-	-	-	-	-	-	-	-	-	-	-	-	-	-	-	-	-	-	-	-	-	-	-	-	-	-	-	-	-	-	-	-	-	-	-
1	192070569	T	G	Traf5	ENSMUST00000085573.11	c.66A>C	p.Ser22Ser	synonymous_variant	6	0.4348 (20/46)	-	-	0.5909 (13/22)	-	-	-	-	-	0.1282 (5/39)	-	-	-	-	-	-	-	-	-	-	-	-	-	-	-	-	-	-	-	-	-	-	0.5333 (8/15)	-	-	-	-	-	-	-
1	193175881	C	CT	A130010J15Rik	ENSMUST00000110831.3	c.*763dupT		3_prime_UTR_variant	2	-	-	-	-	-	-	-	-	-	-	-	-	-	-	-	-	-	-	-	-	-	-	-	-	-	-	-	-	-	-	-	-	-	-	-	-	-	-	-	-
1	193175881	C	CT	Traf3ip3	ENSMUST00000043550.10	c.1450-123dupA		intron_variant	2	-	-	-	-	-	-	-	-	-	-	-	-	-	-	-	-	-	-	-	-	-	-	-	-	-	-	-	-	-	-	-	-	-	-	-	-	-	-	-	-
10	3425797	TGA	T	Ppp1r14c	ENSMUST00000043374.5	c.420+32_420+33delGA		intron_variant	1	-	-	-	-	-	-	-	-	-	-	-	-	-	-	-	-	-	-	-	-	-	-	-	-	-	-	-	-	-	-	-	-	-	-	-	-	-	-	-	-
10	4857075	G	A	Esr1	ENSMUST00000067086.13	c.990G>A	p.Met330Ile	missense_variant	1	-	-	-	-	-	-	-	-	-	-	-	-	-	-	-	-	-	-	-	-	-	-	-	-	-	-	-	-	-	-	-	-	-	-	-	-	-	-	-	-
10	4857076	A	C	Esr1	ENSMUST00000067086.13	c.991A>C	p.Ile331Leu	missense_variant	1	-	-	-	-	-	-	-	-	-	-	-	-	-	-	-	-	-	-	-	-	-	-	-	-	-	-	-	-	-	-	-	-	-	-	-	-	-	-	-	-
10	4857117	C	T	Esr1	ENSMUST00000067086.13	c.1032C>T	p.Ala344Ala	synonymous_variant	1	-	-	-	-	-	-	-	-	-	-	-	-	-	-	-	-	-	-	-	-	-	-	-	-	-	-	-	-	-	-	-	-	-	-	-	-	-	-	-	-
10	4857120	A	G	Esr1	ENSMUST00000067086.13	c.1035A>G	p.Ser345Ser	synonymous_variant	1	-	-	-	-	-	-	-	-	-	-	-	-	-	-	-	-	-	-	-	-	-	-	-	-	-	-	-	-	-	-	-	-	-	-	-	-	-	-	-	-
10	5057903	A	C	Syne1	ENSMUSG00000096054	n.5057903T>G		intragenic_variant	1	-	-	-	-	-	-	-	-	-	-	-	-	-	-	-	-	-	-	-	-	-	-	-	-	-	-	-	-	-	-	-	-	-	-	-	-	-	-	-	-
10	7919163	G	A	Tab2	ENSMUST00000146444.7	c.1554C>T	p.Ser518Ser	synonymous_variant	3	-	-	-	-	-	-	-	-	-	-	-	-	-	-	-	-	-	-	-	-	-	-	-	-	-	-	-	-	-	-	-	-	-	-	-	-	-	-	-	-
10	11290241	T	G	Fbxo30	ENSMUST00000070300.4	c.706T>G	p.Leu236Val	missense_variant	2	-	-	-	-	-	-	-	-	-	-	-	-	-	-	-	-	-	-	-	-	-	-	-	-	-	-	-	-	-	-	-	-	-	-	-	-	-	-	-	-
10	12714348	C	T	Utrn	ENSMUST00000076817.4	c.2311G>A	p.Asp771Asn	missense_variant	1	-	-	-	-	-	0.3725 (19/51)	-	-	-	-	-	-	-	-	-	-	-	-	-	-	-	-	-	-	-	-	-	-	-	-	-	-	-	-	-	-	-	-	-	-
10	14745680	C	T	Nmbr	ENSMUSG00000019865	n.14745680C>T		intragenic_variant	2	-	-	-	-	-	-	-	-	-	-	-	-	-	-	-	-	-	-	-	-	-	-	-	-	-	-	-	-	-	-	-	-	-	-	-	-	1.0 (17/17)	-	-	-
10	14745680	C	T	Gm8355	ENSMUST00000177767.1	n.438G>A		non_coding_transcript_exon_variant	2	-	-	-	-	-	-	-	-	-	-	-	-	-	-	-	-	-	-	-	-	-	-	-	-	-	-	-	-	-	-	-	-	-	-	-	-	1.0 (17/17)	-	-	-
10	18470181	ACGTG	A	Nhsl1	ENSMUST00000207038.1	c.293-2737_293-2734delCGTG		intron_variant	1	-	-	-	-	-	-	-	-	-	-	-	-	-	-	-	-	-	-	-	-	-	-	-	-	-	-	-	-	-	-	-	-	-	-	-	-	-	-	-	-
10	24870689	G	GA	Med23	ENSMUST00000092646.12	c.112dupA	p.Thr38fs	frameshift_variant	1	-	-	-	-	-	-	-	-	-	-	-	-	-	-	-	-	-	-	-	-	-	-	-	-	-	-	-	-	-	-	-	-	-	-	-	-	-	-	-	-
10	25495571	C	T	Epb41l2	ENSMUST00000053748.14	c.1972C>T	p.Leu658Leu	synonymous_variant	1	-	-	-	-	-	-	-	-	-	-	-	-	-	-	-	-	-	-	-	-	-	-	-	-	-	-	-	-	-	-	-	-	-	-	-	-	-	-	-	-
10	29224770	C	CA	9330159F19Rik	ENSMUST00000092627.4	c.1144dupA	p.Thr382fs	frameshift_variant	1	-	-	-	0.1071 (6/56)	-	-	-	-	-	-	-	-	-	-	-	-	-	-	-	-	-	-	-	-	-	-	-	-	-	-	-	-	-	-	-	-	-	-	-	-
10	29317635	C	T	Echdc1	ENSMUST00000020034.4	c.196C>T	p.Pro66Ser	missense_variant	2	-	-	-	-	-	-	-	-	-	-	-	-	-	-	-	-	-	-	-	-	-	-	-	-	-	-	-	-	-	-	-	-	-	-	-	-	-	-	-	-
10	29699078	G	A	Gm10275	ENSMUST00000092620.5	n.303C>T		non_coding_transcript_exon_variant	1	-	-	-	-	-	-	-	-	-	-	-	-	-	-	-	-	-	-	-	-	-	-	-	-	-	-	-	-	-	-	-	-	-	-	-	-	-	-	-	-
10	29699226	A	AC	Gm10275	ENSMUST00000092620.5	n.154dupG		non_coding_transcript_exon_variant	1	-	-	-	-	-	-	-	-	-	-	-	-	-	-	-	-	-	-	-	-	-	-	-	-	-	-	-	-	-	-	-	-	-	-	-	-	-	-	-	-
10	34299054	A	AT	Tspyl4	ENSMUST00000047935.7	c.*331dupT		3_prime_UTR_variant	3	-	-	-	-	-	-	-	-	-	-	-	-	-	-	-	-	-	-	-	-	-	-	-	-	-	-	-	-	-	-	-	-	-	-	-	-	-	-	-	-
10	34299054	A	AT	Nt5dc1	ENSMUSG00000039480	n.34299055dupA		intragenic_variant	3	-	-	-	-	-	-	-	-	-	-	-	-	-	-	-	-	-	-	-	-	-	-	-	-	-	-	-	-	-	-	-	-	-	-	-	-	-	-	-	-
10	34299862	G	GA	Tspyl4	ENSMUST00000047935.7	c.*1134dupA		3_prime_UTR_variant	1	-	-	-	-	-	-	-	-	-	-	-	-	-	-	-	-	-	-	-	-	-	-	-	-	-	-	-	-	-	-	-	-	-	-	-	-	-	-	-	-
10	34299862	G	GA	Nt5dc1	ENSMUSG00000039480	n.34299863dupT		intragenic_variant	1	-	-	-	-	-	-	-	-	-	-	-	-	-	-	-	-	-	-	-	-	-	-	-	-	-	-	-	-	-	-	-	-	-	-	-	-	-	-	-	-
10	39033051	A	C	Lama4	ENSMUST00000019992.5	c.986A>C	p.Lys329Thr	missense_variant	2	-	-	-	-	-	-	-	-	-	-	-	-	-	-	-	-	-	-	-	-	-	-	-	-	-	-	-	-	-	-	-	-	-	-	-	-	-	-	-	-
10	39824105	C	CA	Rev3l	ENSMUST00000019986.12	c.4603dupA	p.Arg1535fs	frameshift_variant	2	-	-	-	-	-	-	-	-	-	-	-	-	-	-	-	-	-	-	-	-	-	-	-	-	-	-	-	-	-	-	-	-	-	-	-	-	-	-	-	-
10	40037381	T	C	Slc16a10	ENSMUST00000092566.6	c.1330A>G	p.Thr444Ala	missense_variant	1	-	-	-	-	-	-	-	-	-	-	-	-	-	-	-	-	-	-	-	-	-	-	-	-	-	-	-	-	-	-	-	-	-	-	-	-	-	-	-	-
10	40834238	TTTC	T	Cdc40	ENSMUST00000044166.7	c.1497_1499delGAA	p.Lys500del	disruptive_inframe_deletion	1	-	-	-	-	-	-	-	-	-	-	-	-	-	-	-	-	-	-	-	-	-	-	-	-	-	-	-	-	-	-	-	-	-	-	-	-	-	-	-	-
10	41719892	C	T	Cep57l1	ENSMUST00000019951.15	c.1093G>A	p.Glu365Lys	missense_variant	1	-	-	-	-	-	-	-	-	-	-	-	-	-	-	-	-	-	-	-	-	-	-	-	-	-	-	-	-	-	-	-	-	-	-	-	-	-	-	-	-
10	43021247	G	GT	Sobp	ENSMUST00000040275.8	c.2340dupA	p.Leu781fs	frameshift_variant	1	-	-	-	-	-	-	-	-	-	-	-	-	-	-	-	-	-	-	-	-	-	-	-	-	-	-	-	-	-	-	-	-	-	-	-	-	-	-	-	-
10	50713278	G	T	Ascc3	ENSMUST00000035606.8	c.3078+16G>T		intron_variant	1	-	-	-	-	-	-	-	-	-	-	-	-	-	-	-	-	-	-	-	-	-	-	-	-	-	-	-	-	-	-	-	-	-	-	-	-	-	-	-	-
10	51480889	G	GT	Lilr4b	ENSMUST00000102894.3	c.35-5dupT		splice_region_variant&intron_variant	1	-	-	-	-	-	-	-	-	-	-	-	-	-	-	-	-	-	-	-	-	-	-	-	-	-	-	-	-	-	-	-	-	-	-	-	-	-	-	-	-
10	51480889	G	GT	Lilrb4a	ENSMUSG00000062593	n.51480901dupT		intragenic_variant	1	-	-	-	-	-	-	-	-	-	-	-	-	-	-	-	-	-	-	-	-	-	-	-	-	-	-	-	-	-	-	-	-	-	-	-	-	-	-	-	-
10	52543245	T	C	Zfa-ps	ENSMUST00000180673.1	n.2495A>G		non_coding_transcript_exon_variant	1	-	-	0.1736 (21/121)	-	-	-	-	-	-	-	-	-	-	-	-	-	-	-	-	-	-	-	-	-	-	-	-	-	-	-	-	-	-	-	-	-	-	-	-	-
10	53073454	G	T	Slc35f1	ENSMUST00000105473.2	c.638G>T	p.Gly213Val	missense_variant&splice_region_variant	1	-	-	-	-	-	-	-	-	-	-	-	-	-	-	-	-	-	-	-	-	-	-	-	-	-	-	-	-	-	-	-	0.5714 (16/28)	-	-	-	-	-	-	-	-
10	53615987	A	C	Mcm9	ENSMUST00000075540.5	c.1237T>G	p.Cys413Gly	missense_variant	1	-	-	-	-	-	-	-	-	-	-	-	-	-	-	-	-	-	-	-	-	-	-	-	-	-	-	-	-	-	-	-	-	-	-	-	-	-	-	-	-
10	57509172	A	G	Hsf2	ENSMUST00000079833.4	c.1174-2272A>G		intron_variant	1	-	-	-	-	-	-	-	-	-	-	-	-	-	-	-	-	-	-	-	-	-	-	-	-	-	-	-	-	-	-	-	-	-	-	-	-	-	-	-	-
10	59951058	ATT	A	Ddit4	ENSMUST00000020308.3	c.197-31_197-30delAA		intron_variant	1	-	-	-	-	-	-	-	-	-	-	-	-	-	-	-	-	-	-	-	-	-	-	-	-	-	-	-	-	-	-	-	-	-	-	-	-	-	-	-	-
10	61738459	A	C	Aifm2	ENSMUST00000080099.5	c.1031A>C	p.Lys344Thr	missense_variant	1	-	-	-	-	-	-	-	-	-	-	-	-	-	-	-	-	-	-	-	-	-	-	-	-	-	-	-	-	-	-	-	-	-	-	0.1778 (8/45)	-	-	-	-	-
10	62072133	C	T	Gm5424	ENSMUST00000053865.5	c.1011C>T	p.Cys337Cys	synonymous_variant	1	-	-	-	-	-	-	-	-	-	-	-	-	-	-	-	-	-	-	-	-	-	-	-	-	-	-	-	-	-	-	-	-	-	-	-	-	1.0 (13/13)	-	-	-
10	62284457	TAC	T	Hk1	ENSMUST00000072357.13	c.1801-61_1801-60delGT		intron_variant	1	-	-	-	-	-	-	-	-	-	-	-	-	-	-	-	-	-	-	-	-	-	-	-	-	-	-	-	-	-	-	-	-	-	-	-	-	-	-	-	-
10	62582495	C	G	Ddx21	ENSMUST00000045866.7	c.2411G>C	p.Arg804Pro	missense_variant	1	-	-	-	-	-	-	-	-	-	-	-	-	-	-	-	-	-	-	-	-	-	-	-	-	-	-	-	-	-	-	-	-	-	-	-	-	-	-	-	-
10	62640446	C	A	Ddx50	ENSMUST00000020270.4	c.934+1G>T		splice_donor_variant&intron_variant	2	-	-	-	-	-	-	-	-	-	-	-	-	-	0.6471 (44/68)	-	-	-	-	-	-	-	-	-	-	-	-	-	-	-	-	-	-	-	-	-	-	-	-	-	-
10	62961468	A	T	Dna2	ENSMUST00000131422.7	c.1697A>T	p.Glu566Val	missense_variant	1	-	-	-	-	-	-	-	-	-	-	-	-	-	-	-	-	-	-	-	-	-	-	-	-	-	-	-	-	-	-	-	-	-	-	-	-	-	-	-	-
10	63118375	A	C	Mypn	ENSMUST00000095580.2	c.3778+46T>G		intron_variant	1	-	-	-	-	-	-	-	-	-	-	-	-	-	-	-	-	-	-	-	-	-	-	-	-	-	-	-	-	-	-	-	-	-	-	-	-	-	-	-	-
10	63821111	T	C	Ctnna3	ENSMUST00000075099.4	c.843+626T>C		intron_variant	1	-	-	-	-	-	-	-	-	0.3529 (24/68)	-	-	-	-	-	-	-	-	-	-	-	-	-	-	-	-	-	-	-	-	-	-	-	-	-	-	-	-	-	-	-
10	67225947	G	GA	Jmjd1c	ENSMUST00000174408.7	c.4085dupA	p.Asn1362fs	frameshift_variant	1	-	-	-	-	-	-	-	-	-	-	-	-	-	-	-	-	-	-	-	-	-	-	-	-	-	-	-	-	-	-	-	-	-	-	-	-	-	-	-	-
10	67538152	C	CA	Egr2	ENSMUST00000048289.13	c.-61dupA		5_prime_UTR_variant	1	-	-	-	-	-	-	-	-	-	-	-	-	-	-	-	-	-	-	-	-	-	-	-	-	-	-	-	-	-	-	-	-	-	-	-	-	-	-	-	-
10	74550417	T	TA	Pcdh15	ENSMUST00000193361.5	c.3389-31dupA		intron_variant	1	-	-	-	-	-	-	-	-	-	-	-	-	-	-	-	-	-	-	-	-	-	-	-	-	-	-	-	-	-	-	-	-	-	-	-	-	-	-	-	-
10	75725598	G	A	Cabin1	ENSMUST00000001712.6	c.3068C>T	p.Ala1023Val	missense_variant	2	0.3784 (14/37)	-	-	-	-	-	-	-	-	-	-	-	-	-	-	-	-	-	-	-	-	-	-	-	-	-	-	-	-	-	-	-	0.1042 (5/48)	-	-	-	-	-	-	-
10	76170746	C	A	Slc5a4a	ENSMUST00000020450.3	c.981C>A	p.Phe327Leu	missense_variant	1	-	-	-	-	-	-	-	-	-	-	-	-	-	-	-	-	-	-	-	-	-	-	-	-	-	-	-	-	-	-	-	-	-	-	-	-	-	-	-	-
10	76321531	T	G	Dip2a	ENSMUST00000105417.9	c.239A>C	p.Lys80Thr	missense_variant	2	-	-	-	-	-	-	-	-	-	-	-	-	-	-	-	-	-	-	-	-	-	-	-	-	-	-	-	-	-	-	-	-	-	-	-	-	-	-	-	-
10	76611988	T	A	Col6a2	ENSMUST00000001181.12	c.860A>T	p.Asn287Ile	missense_variant	1	-	-	-	-	-	-	-	-	-	-	-	-	-	-	-	-	-	-	-	-	-	-	-	-	-	-	-	-	-	-	-	-	-	-	-	0.2453 (13/53)	-	-	-	-
10	77901519	G	A	Lrrc3	ENSMUST00000057608.4	c.82C>T	p.Arg28Trp	missense_variant	1	-	-	-	-	-	-	-	-	-	-	-	-	-	-	-	-	-	-	-	-	-	-	-	-	-	-	-	-	-	-	-	-	-	-	-	-	-	-	-	-
10	78581081	T	A	Ilvbl	ENSMUST00000105384.3	c.1077T>A	p.Ser359Ser	synonymous_variant	2	-	-	-	-	-	-	-	-	-	-	-	-	-	-	-	-	-	-	-	-	-	-	-	-	-	-	-	-	-	-	-	-	-	-	-	-	-	-	-	-
10	79861727	A	AT	Ptbp1	ENSMUST00000172282.7	c.1114-279dupT		intron_variant	1	-	-	-	-	-	-	-	-	-	-	-	-	-	-	-	-	-	-	-	-	-	-	-	-	-	-	-	-	-	-	-	-	-	-	-	-	-	-	-	-
10	79861727	A	AT	Plppr3	ENSMUSG00000035835	n.79861728dupA		intragenic_variant	1	-	-	-	-	-	-	-	-	-	-	-	-	-	-	-	-	-	-	-	-	-	-	-	-	-	-	-	-	-	-	-	-	-	-	-	-	-	-	-	-
10	79911047	G	A	R3hdm4	ENSMUST00000045628.13	c.781C>T	p.Gln261*	stop_gained	1	-	-	-	-	-	-	-	-	-	-	-	-	-	-	-	-	-	-	-	-	-	-	-	-	-	-	-	-	-	-	-	-	-	-	-	-	-	-	-	-
10	79911047	G	A	Gm26602	ENSMUST00000181321.1	c.192G>A	p.Leu64Leu	synonymous_variant	1	-	-	-	-	-	-	-	-	-	-	-	-	-	-	-	-	-	-	-	-	-	-	-	-	-	-	-	-	-	-	-	-	-	-	-	-	-	-	-	-
10	79992492	A	C	Cnn2	ENSMUST00000004784.10	c.302A>C	p.Asn101Thr	missense_variant	1	-	-	-	-	-	-	-	-	-	-	-	-	-	-	-	-	-	-	-	-	-	-	-	-	-	-	-	-	-	-	-	-	-	-	-	-	-	-	-	-
10	80009066	T	G	Abca7	ENSMUST00000171637.7	c.4621T>G	p.Leu1541Val	missense_variant	3	-	-	-	-	-	-	-	-	-	-	-	-	-	-	-	-	-	-	-	-	-	-	-	-	-	-	-	-	-	-	-	-	-	-	-	-	-	-	-	-
10	80061105	G	A	Sbno2	ENSMUST00000042771.7	c.2376C>T	p.Ile792Ile	synonymous_variant	1	-	-	-	-	-	-	-	-	-	-	-	-	-	-	-	-	-	-	-	-	-	-	-	-	-	-	-	-	-	-	-	-	-	-	-	-	-	-	-	-
10	80322890	G	A	Pcsk4	ENSMUST00000020340.14	c.1569-42C>T		intron_variant	1	-	-	-	-	-	-	-	-	-	-	0.5 (10/20)	-	-	-	-	-	-	-	-	-	-	-	-	-	-	-	-	-	-	-	-	-	-	-	-	-	-	-	-	-
10	80394522	C	A	Mbd3	ENSMUST00000092295.9	c.499+44G>T		intron_variant	1	-	-	-	-	-	-	-	-	-	-	-	-	-	-	-	-	-	-	-	-	-	-	-	-	-	-	-	-	-	-	-	-	-	-	-	-	-	-	-	-
10	80526149	C	G	Atp8b3	ENSMUST00000020383.4	c.2132+21G>C		intron_variant	1	-	-	-	-	-	-	-	-	-	-	-	-	-	-	-	-	-	-	-	-	-	-	-	-	-	-	-	-	-	-	-	-	-	-	-	-	-	-	-	-
10	80606650	G	T	Adat3	ENSMUST00000038411.4	c.321G>T	p.Ala107Ala	synonymous_variant	2	-	-	-	-	-	-	-	-	-	-	-	-	-	-	-	-	-	-	-	-	-	-	-	-	-	-	-	-	-	-	-	-	-	-	-	-	-	-	-	-
10	80606650	G	T	Scamp4	ENSMUST00000079883.10	c.-41-2153G>T		intron_variant	2	-	-	-	-	-	-	-	-	-	-	-	-	-	-	-	-	-	-	-	-	-	-	-	-	-	-	-	-	-	-	-	-	-	-	-	-	-	-	-	-
10	81182877	T	C	4930442H23Rik	ENSMUST00000056086.4	c.311A>G	p.Ter104Trpext*?	stop_lost	1	-	-	-	-	-	-	-	-	-	-	-	-	-	-	-	-	-	-	-	-	0.1282 (10/78)	-	-	-	-	-	-	-	-	-	-	-	-	-	-	-	-	-	-	-
10	81360148	C	T	Mfsd12	ENSMUST00000044844.8	c.356C>T	p.Thr119Met	missense_variant	1	-	-	-	-	-	-	-	-	-	-	-	-	-	-	-	-	-	-	-	-	-	0.3684 (7/19)	-	-	-	-	-	-	-	-	-	-	-	-	-	-	-	-	-	-
10	81370946	G	A	Fzr1	ENSMUST00000140901.7	c.259+9C>T		intron_variant	1	-	-	-	-	-	-	-	-	-	-	-	-	0.3158 (6/19)	-	-	-	-	-	-	-	-	-	-	-	-	-	-	-	-	-	-	-	-	-	-	-	-	-	-	-
10	83508643	A	C	Aldh1l2	ENSMUST00000020497.13	c.1377T>G	p.Thr459Thr	synonymous_variant	1	-	-	-	-	-	-	-	-	-	0.3476 (73/210)	-	-	-	-	-	-	-	-	-	-	-	-	-	-	-	-	-	-	-	-	-	-	-	-	-	-	-	-	-	-
10	84380781	T	C	Nuak1	ENSMUST00000020220.14	c.668A>G	p.Glu223Gly	missense_variant	1	-	-	-	-	-	-	-	-	-	-	-	-	-	-	-	-	-	-	-	-	-	-	-	-	-	-	-	-	-	-	-	-	-	-	-	-	-	-	-	-
10	85884466	G	A	Pwp1	ENSMUST00000001836.8	c.966G>A	p.Ser322Ser	synonymous_variant	1	-	-	-	-	-	-	-	-	-	-	-	-	-	-	-	-	-	-	-	-	-	-	-	-	-	-	-	-	-	-	-	-	-	-	-	-	-	-	-	-
10	86031054	T	G	Fbxo7	ENSMUST00000130320.7	c.772T>G	p.Leu258Val	missense_variant	2	-	-	-	-	-	-	-	-	-	-	-	-	-	-	-	-	-	-	-	-	-	-	-	-	-	-	-	-	-	-	-	-	-	-	-	-	-	-	-	-
10	86344658	C	T	Timp3	ENSMUST00000020234.13	c.421C>T	p.Leu141Leu	synonymous_variant	1	-	-	-	-	-	-	-	-	-	-	-	-	-	-	-	-	-	-	-	-	-	-	-	-	-	-	-	-	-	-	-	-	-	-	-	-	-	-	-	-
10	86344658	C	T	Syn3	ENSMUST00000120638.7	c.708+6893G>A		intron_variant	1	-	-	-	-	-	-	-	-	-	-	-	-	-	-	-	-	-	-	-	-	-	-	-	-	-	-	-	-	-	-	-	-	-	-	-	-	-	-	-	-
10	88414513	C	T	Gnptab	ENSMUST00000020251.9	c.486C>T	p.His162His	synonymous_variant	1	-	-	-	-	-	-	-	-	-	-	-	-	-	-	-	-	-	-	-	-	-	-	-	-	-	-	-	-	-	-	-	-	-	-	-	-	-	-	-	-
10	102485017	C	T	Nts	ENSMUST00000020040.3	c.210G>A	p.Pro70Pro	synonymous_variant	1	-	-	-	-	-	-	-	-	-	-	-	-	-	-	-	-	-	-	-	-	-	-	-	-	-	-	-	-	-	-	-	-	-	-	-	-	-	-	-	-
10	103215189	T	G	Lrriq1	ENSMUST00000166240.7	c.1701A>C	p.Lys567Asn	missense_variant	1	-	-	-	-	-	-	-	-	-	-	-	-	-	-	-	-	-	-	-	-	-	-	-	-	-	-	-	-	-	-	-	-	-	0.1627 (27/166)	-	-	-	-	-	-
10	106937349	A	G	Acss3	ENSMUST00000165067.7	c.1805-30T>C		intron_variant	1	-	-	-	-	-	-	-	-	-	-	-	-	-	-	-	-	-	-	-	-	-	-	-	-	-	-	-	-	-	-	-	-	-	-	-	-	-	-	-	-
10	107484230	A	G	Myf5	ENSMUST00000000445.1	c.578-20T>C		intron_variant	1	-	-	-	-	-	-	-	-	-	-	-	-	-	-	-	-	-	-	-	-	-	-	-	-	-	-	-	-	-	-	-	-	-	-	-	-	-	-	-	-
10	107635451	G	T	Ptprq	ENSMUST00000050702.8	c.4088C>A	p.Pro1363Gln	missense_variant	1	-	-	-	-	-	0.1449 (10/69)	-	-	-	-	-	-	-	-	-	-	-	-	-	-	-	-	-	-	-	-	-	-	-	-	-	-	-	-	-	-	-	-	-	-
10	108627363	G	A	Syt1	ENSMUST00000064054.13	c.697C>T	p.Arg233Cys	missense_variant	1	-	-	-	-	-	-	-	-	-	0.2424 (8/33)	-	-	-	-	-	-	-	-	-	-	-	-	-	-	-	-	-	-	-	-	-	-	-	-	-	-	-	-	-	-
10	117289170	G	T	Lyz1	ENSMUST00000092162.5	c.329C>A	p.Ala110Asp	missense_variant	1	-	-	-	-	-	-	-	-	-	-	-	-	-	-	-	-	-	-	-	-	-	-	-	-	-	-	-	-	-	-	-	-	-	-	-	-	-	-	-	-
10	117289174	C	A	Lyz1	ENSMUST00000092162.5	c.325G>T	p.Ala109Ser	missense_variant	1	-	-	-	-	-	-	-	-	-	-	-	-	-	-	-	-	-	-	-	-	-	-	-	-	-	-	-	-	-	-	-	-	-	-	-	-	-	-	-	-
10	117292791	G	A	Lyz1	ENSMUST00000092162.5	c.48C>T	p.Ala16Ala	synonymous_variant	1	-	-	-	-	-	-	-	-	-	-	-	-	-	-	-	-	-	-	-	-	-	-	-	-	-	-	-	-	-	-	-	-	-	-	-	-	-	-	-	-
10	117690460	T	A	Mdm2	ENSMUST00000020408.14	c.1220A>T	p.Gln407Leu	missense_variant	1	-	-	-	-	-	-	-	-	-	-	0.5179 (87/168)	-	-	-	-	-	-	-	-	-	-	-	-	-	-	-	-	-	-	-	-	-	-	-	-	-	-	-	-	-
10	117820482	G	A	Rap1b	ENSMUST00000064667.7	c.304C>T	p.Arg102Trp	missense_variant	2	-	-	-	-	-	-	-	-	-	-	-	-	-	-	-	-	-	-	-	-	-	-	0.314 (27/86)	-	-	-	-	-	-	-	-	-	-	-	-	-	-	-	-	-
10	120010254	A	C	Grip1	ENSMUST00000138410.7	c.1733A>C	p.Lys578Thr	missense_variant	1	-	-	-	-	-	-	-	-	-	-	-	-	-	-	-	-	-	-	-	-	-	-	-	-	-	-	-	-	-	-	-	-	-	-	-	-	-	-	-	-
10	120145676	C	T	Irak3	ENSMUST00000020448.10	c.1323G>A	p.Thr441Thr	synonymous_variant	1	-	-	-	-	-	-	-	-	-	-	-	-	-	-	-	-	-	-	-	-	-	-	-	-	-	-	-	-	-	-	-	-	-	-	-	-	-	-	-	-
10	121615115	C	CA	Xpot	ENSMUST00000039810.7	c.378dupT	p.Asp127fs	frameshift_variant	13	-	-	-	0.1194 (8/67)	-	-	-	-	-	-	-	-	-	-	-	0.1558 (12/77)	0.1064 (5/47)	-	-	-	-	-	-	-	-	-	-	-	-	-	0.1039 (8/77)	-	-	-	0.1354 (13/96)	-	-	-	-	0.1286 (9/70)
10	121615115	CA	C	Xpot	ENSMUST00000039810.7	c.378delT	p.Phe126fs	frameshift_variant	1	-	-	-	-	-	-	-	-	-	-	-	-	0.1 (4/40)	-	-	-	-	-	-	-	-	-	-	-	-	-	-	-	-	-	-	-	-	-	-	-	-	-	-	-
10	127064942	C	G	Cdk4	ENSMUST00000006911.11	c.462C>G	p.Val154Val	synonymous_variant	3	-	-	-	-	-	-	-	-	-	-	-	-	-	-	-	-	-	-	-	-	-	-	-	-	-	-	-	-	-	-	-	-	-	-	-	-	-	-	-	-
10	127549350	C	A	Lrp1	ENSMUST00000049149.14	c.10681G>T	p.Asp3561Tyr	missense_variant	1	-	-	-	-	-	-	-	-	-	-	-	-	-	-	-	-	-	-	-	-	-	-	-	-	-	-	-	-	-	-	-	-	-	-	-	-	-	-	-	-
10	127742352	A	C	Zbtb39	ENSMUST00000054287.7	c.794A>C	p.Asn265Thr	missense_variant	1	-	-	-	-	-	-	-	-	-	-	-	-	-	-	-	-	-	-	-	-	-	-	-	-	-	-	-	-	-	-	-	-	-	-	-	-	-	-	-	-
10	127849941	C	CTA	Rdh19	ENSMUST00000077530.2	c.-79_-78insAT		5_prime_UTR_variant	1	-	-	-	-	-	-	-	-	-	-	-	-	-	-	-	-	-	-	-	-	-	-	-	-	-	-	-	-	-	-	-	-	-	-	-	-	-	-	-	-
10	128085264	C	CT	Atp5b	ENSMUST00000026459.5	c.607+58dupT		intron_variant	1	-	-	-	-	-	-	-	-	-	-	-	-	-	-	-	-	-	-	-	-	-	-	-	-	-	-	-	-	-	-	-	-	-	-	-	-	-	-	-	-
10	128252146	T	A	Timeless	ENSMUST00000055539.10	c.3530-46T>A		intron_variant	1	-	-	-	-	-	-	-	-	-	-	-	-	-	-	-	-	-	-	-	-	-	-	-	-	-	-	-	-	-	-	-	-	-	-	-	-	-	-	-	-
10	128626131	T	A	Rps26	ENSMUST00000026420.5	c.113A>T	p.Lys38Met	missense_variant	1	-	-	-	-	-	-	-	-	-	0.168 (339/2018)	-	-	-	-	-	-	-	-	-	-	-	-	-	-	-	-	-	-	-	-	-	-	-	-	-	-	-	-	-	-
10	129857029	C	T	Olfr813	ENSMUST00000064893.2	c.510C>T	p.Asn170Asn	synonymous_variant	1	-	-	-	-	-	-	-	-	-	-	-	-	-	-	-	-	-	-	-	-	-	-	-	-	-	-	-	-	-	-	-	-	-	-	-	-	-	-	-	-
10	130360836	T	C	Tespa1	ENSMUST00000042586.8	c.642T>C	p.Asp214Asp	synonymous_variant	1	-	-	-	-	-	-	-	-	-	-	-	-	-	-	-	-	-	-	-	-	-	-	-	-	-	-	-	-	-	-	-	-	-	-	-	-	-	-	-	-
11	3177444	C	T	Sfi1	ENSMUST00000081318.12	c.455G>A	p.Arg152Gln	missense_variant	1	-	-	-	-	-	-	-	-	-	-	-	-	-	-	-	-	-	-	-	-	-	-	-	-	-	-	-	-	-	-	-	-	-	-	-	-	-	-	-	-
11	3185885	T	C	Sfi1	ENSMUST00000081318.12	c.266+180A>G		intron_variant	2	-	-	-	-	-	-	-	-	-	-	-	-	-	-	-	-	-	-	-	-	-	-	-	-	-	-	-	-	-	0.3684 (7/19)	-	-	-	-	-	-	-	-	-	-
11	3256709	G	C	Drg1	ENSMUST00000020741.11	c.416C>G	p.Ala139Gly	missense_variant	1	-	-	-	-	-	-	-	-	-	-	-	-	-	-	-	-	-	-	-	-	-	-	-	-	-	-	0.1127 (24/213)	-	-	-	-	-	-	-	-	-	-	-	-	-
11	3714636	C	A	Osbp2	ENSMUST00000070552.13	c.1695G>T	p.Val565Val	synonymous_variant	1	-	-	-	-	-	-	-	0.1026 (4/39)	-	-	-	-	-	-	-	-	-	-	-	-	-	-	-	-	-	-	-	-	-	-	-	-	-	-	-	-	-	-	-	-
11	5041715	C	G	Ap1b1	ENSMUST00000009234.15	c.2758-3C>G		splice_region_variant&intron_variant	1	-	-	-	-	-	-	-	-	-	-	-	-	-	-	-	-	-	-	-	-	-	-	-	-	-	-	-	-	-	-	-	-	-	-	-	-	-	-	-	-
11	5797187	T	A	Dbnl	ENSMUST00000020769.13	c.704+12T>A		intron_variant	1	-	-	-	-	-	-	-	-	-	-	-	-	-	-	-	-	-	-	-	-	-	-	-	-	-	-	-	-	-	-	-	-	-	-	-	-	-	-	-	-
11	5866897	C	CT	Aebp1	ENSMUST00000102923.9	c.989-17dupT		intron_variant	1	-	-	-	-	-	-	-	-	-	-	-	-	-	-	-	-	-	-	-	-	-	0.2273 (5/22)	-	-	-	-	-	-	-	-	-	-	-	-	-	-	-	-	-	-
11	6200035	G	A	Nudcd3	ENSMUST00000066496.9	c.100C>T	p.Leu34Phe	missense_variant	2	-	-	-	-	-	-	-	-	-	-	-	-	-	-	-	-	-	-	-	-	-	-	-	-	-	-	-	-	-	-	-	-	-	-	-	0.381 (16/42)	-	-	-	-
11	6200035	G	A	A730071L15Rik	ENSMUST00000181545.1	c.7G>A	p.Glu3Lys	missense_variant	2	-	-	-	-	-	-	-	-	-	-	-	-	-	-	-	-	-	-	-	-	-	-	-	-	-	-	-	-	-	-	-	-	-	-	-	0.381 (16/42)	-	-	-	-
11	6259562	G	C	Ddx56	ENSMUST00000004507.10	c.1548C>G	p.Phe516Leu	missense_variant	1	-	-	-	-	-	-	-	-	-	-	-	-	-	-	-	-	-	-	-	-	-	-	-	-	-	-	-	-	-	-	-	-	-	-	-	-	-	0.2812 (18/64)	-	-
11	6419781	G	A	Ppia	ENSMUST00000132846.1	c.*171G>A		3_prime_UTR_variant	2	-	-	-	-	-	-	-	-	-	-	-	-	-	-	-	-	-	-	-	-	-	-	-	-	-	-	-	-	-	-	-	-	-	-	-	-	-	-	-	-
11	6598568	CA	C	Nacad	ENSMUST00000045713.3	c.4164delT	p.Phe1388fs	frameshift_variant	1	-	-	-	-	-	-	-	-	-	-	-	-	-	-	-	-	-	-	-	-	-	-	-	-	-	-	-	-	-	-	-	-	-	-	-	0.3579 (34/95)	-	-	-	-
11	6637294	A	C	Wap	ENSMUST00000102910.3	c.119T>G	p.Ile40Ser	missense_variant	1	-	-	-	-	-	-	-	-	-	-	-	-	-	-	-	-	-	-	-	-	-	-	-	-	-	-	-	-	-	-	-	-	-	-	-	-	-	-	-	-
11	11936782	A	C	Grb10	ENSMUST00000093321.11	c.1486T>G	p.Phe496Val	missense_variant	1	-	-	-	-	-	-	-	-	-	-	-	-	-	-	-	-	-	-	-	-	-	-	-	-	-	-	-	-	-	-	-	-	-	-	0.1101 (12/109)	-	-	-	-	-
11	16911601	A	T	Egfr	ENSMUST00000020329.12	c.3379A>T	p.Asn1127Tyr	missense_variant	1	-	-	-	-	-	-	-	-	-	-	-	-	-	-	-	-	-	-	-	-	-	-	-	-	-	-	-	-	-	-	-	-	-	-	-	-	-	-	-	-
11	21885008	G	GGAA	Wdpcp	ENSMUST00000020568.9	c.2016_2018dupAGA	p.Glu673dup	disruptive_inframe_insertion	1	-	-	-	-	-	-	-	-	-	-	-	-	-	-	-	-	-	-	-	-	-	-	-	-	-	-	-	-	-	-	-	-	-	-	-	-	-	-	-	-
11	23333674	G	GA	Usp34	ENSMUST00000137823.7	c.432dupA	p.Ser145fs	frameshift_variant	1	-	-	-	-	-	-	-	-	-	-	-	-	-	-	-	-	-	-	-	-	-	-	-	-	-	-	-	-	-	-	-	-	-	-	-	-	-	-	-	-
11	23370482	A	G	Usp34	ENSMUST00000137823.7	c.2823A>G	p.Lys941Lys	synonymous_variant	1	-	-	-	-	-	-	-	-	-	-	-	-	-	-	-	-	-	-	-	-	-	-	-	-	-	-	-	-	-	-	-	-	-	-	-	-	-	-	-	-
11	23370483	C	T	Usp34	ENSMUST00000137823.7	c.2824C>T	p.Leu942Phe	missense_variant	1	-	-	-	-	-	-	-	-	-	-	-	-	-	-	-	-	-	-	-	-	-	-	-	-	-	-	-	-	-	-	-	-	-	-	-	-	-	-	-	-
11	29211629	A	T	Smek2	ENSMUST00000020755.11	c.2002A>T	p.Asn668Tyr	missense_variant	1	-	-	-	-	-	-	-	-	-	-	-	-	-	-	-	-	-	-	-	0.3708 (33/89)	-	-	-	-	-	-	-	-	-	-	-	-	-	-	-	-	-	-	-	-
11	29693804	TGATGGCGCCCCCGCTGGCG	T	Rtn4	ENSMUST00000102843.9	c.505+113_505+131delATGGCGCCCCCGCTGGCGG		intron_variant	1	-	-	-	-	-	-	-	-	-	-	-	-	-	-	-	-	-	-	-	-	-	-	-	-	-	-	-	-	-	-	-	-	-	-	-	-	-	-	-	-
11	32214206	C	T	Rhbdf1	ENSMUST00000020524.14	c.771G>A	p.Glu257Glu	synonymous_variant	2	-	-	-	-	-	-	-	-	-	-	-	-	-	-	-	-	-	-	-	-	-	-	-	-	-	-	-	-	-	-	-	-	-	-	-	-	-	-	-	-
11	32499359	G	A	Ubtd2	ENSMUST00000051053.4	c.205G>A	p.Glu69Lys	missense_variant	1	-	-	-	-	0.2547 (27/106)	-	-	-	-	-	-	-	-	-	-	-	-	-	-	-	-	-	-	-	-	-	-	-	-	-	-	-	-	-	-	-	-	-	-	-
11	32522879	T	TTC	Efcab9	ENSMUST00000054327.2	c.565_566dupGA	p.Glu191fs	frameshift_variant	1	-	-	-	-	-	-	-	-	-	-	-	-	-	-	-	-	-	-	-	-	-	-	-	-	-	-	-	-	-	-	-	-	-	-	-	-	-	-	-	-
11	32577712	C	T	Stk10	ENSMUST00000102821.3	c.459C>T	p.Ile153Ile	synonymous_variant	2	-	-	-	-	-	-	-	-	-	-	-	-	-	-	-	-	-	-	-	-	-	-	-	-	-	-	-	-	-	-	-	-	-	-	-	-	-	-	-	-
11	34707344	G	A	Dock2	ENSMUST00000093193.11	c.999C>T	p.Ile333Ile	synonymous_variant	1	-	-	-	-	-	-	-	-	-	-	-	-	-	0.3923 (51/130)	-	-	-	-	-	-	-	-	-	-	-	-	-	-	-	-	-	-	-	-	-	-	-	-	-	-
11	36023736	G	A	Tenm2	ENSMUST00000057207.5	c.6973C>T	p.His2325Tyr	missense_variant	1	-	-	-	-	-	-	-	-	-	-	-	-	-	0.2203 (13/59)	-	-	-	-	-	-	-	-	-	-	-	-	-	-	-	-	-	-	-	-	-	-	-	-	-	-
11	43706535	A	G	Pwwp2a	ENSMUST00000061070.5	c.*333A>G		3_prime_UTR_variant	1	-	-	-	-	-	-	-	-	-	-	-	-	-	-	-	-	-	-	-	-	-	-	-	-	-	-	-	-	-	-	-	-	-	-	-	-	-	-	-	-
11	43706545	A	G	Pwwp2a	ENSMUST00000061070.5	c.*343A>G		3_prime_UTR_variant	2	-	-	-	-	-	-	-	-	-	-	-	-	-	-	-	-	-	-	-	-	-	-	-	-	-	-	-	-	-	-	-	-	-	-	-	-	-	-	-	-
11	44924537	A	T	Ebf1	ENSMUST00000101326.9	c.1001A>T	p.Gln334Leu	missense_variant	1	-	-	-	-	-	-	-	-	-	-	-	-	-	-	-	-	-	-	-	-	-	-	-	-	-	-	-	-	-	-	-	-	-	-	0.1346 (7/52)	-	-	-	-	-
11	46537931	G	T	Gm12169	ENSMUST00000109228.1	c.679G>T	p.Glu227*	stop_gained	1	-	-	-	-	-	-	-	-	-	-	-	-	-	-	-	-	-	-	-	-	-	-	-	-	-	-	-	-	-	-	-	-	-	-	-	-	-	-	-	-
11	48807873	TA	T	Trim41	ENSMUST00000047145.13	c.1292-28delT		intron_variant	1	-	-	-	-	-	-	-	-	-	-	-	-	-	-	-	-	-	-	-	-	-	-	-	-	-	-	-	-	-	-	-	-	-	-	-	-	-	-	-	-
11	51560027	A	G	Col23a1	ENSMUST00000102765.8	c.663A>G	p.Gly221Gly	synonymous_variant	1	-	-	-	0.1224 (18/147)	-	-	-	-	-	-	-	-	-	-	-	-	-	-	-	-	-	-	-	-	-	-	-	-	-	-	-	-	-	-	-	-	-	-	-	-
11	51600449	C	G	Phykpl	ENSMUST00000020625.6	c.1304-120C>G		intron_variant	1	-	-	-	-	-	-	-	-	-	-	-	-	-	-	-	-	-	-	-	-	-	-	-	-	-	-	-	-	-	-	-	-	-	-	-	-	-	-	-	-
11	51600449	C	G	Hnrnpab	ENSMUSG00000020358	n.51600449G>C		intragenic_variant	1	-	-	-	-	-	-	-	-	-	-	-	-	-	-	-	-	-	-	-	-	-	-	-	-	-	-	-	-	-	-	-	-	-	-	-	-	-	-	-	-
11	51600469	A	G	Phykpl	ENSMUST00000020625.6	c.1304-100A>G		intron_variant	1	-	-	-	-	-	-	-	-	-	-	-	-	-	-	-	-	-	-	-	-	-	-	-	-	-	-	-	-	-	-	-	-	-	-	-	-	-	-	-	-
11	51600469	A	G	Hnrnpab	ENSMUSG00000020358	n.51600469T>C		intragenic_variant	1	-	-	-	-	-	-	-	-	-	-	-	-	-	-	-	-	-	-	-	-	-	-	-	-	-	-	-	-	-	-	-	-	-	-	-	-	-	-	-	-
11	51627034	T	C	Rmnd5b	ENSMUST00000001081.9	c.492A>G	p.Glu164Glu	synonymous_variant	1	-	-	-	-	-	-	-	-	-	-	-	-	-	-	-	-	-	-	-	-	-	-	-	-	-	-	-	-	-	-	-	-	-	-	-	-	-	-	-	-
11	52236851	G	A	Skp1a	ENSMUST00000037324.11	c.15G>A	p.Lys5Lys	synonymous_variant	2	-	-	-	-	-	-	-	-	-	-	-	-	-	-	-	-	-	-	-	-	-	-	-	-	-	-	-	-	-	-	-	-	-	-	-	-	-	0.4346 (93/214)	-	-
11	52236851	G	A	Gm26551	ENSMUST00000181262.1	n.2365+30299C>T		intron_variant	2	-	-	-	-	-	-	-	-	-	-	-	-	-	-	-	-	-	-	-	-	-	-	-	-	-	-	-	-	-	-	-	-	-	-	-	-	-	0.4346 (93/214)	-	-
11	52282208	C	G	Tcf7	ENSMUST00000086844.9	c.10G>C	p.Glu4Gln	missense_variant	2	-	-	-	-	-	-	-	-	-	-	-	-	-	-	-	-	-	-	-	-	-	-	-	-	-	-	-	-	-	-	-	-	-	-	-	-	-	0.3793 (11/29)	-	-
11	52282208	C	G	A630014C17Rik	ENSMUST00000150973.1	n.388-1375C>G		intron_variant	2	-	-	-	-	-	-	-	-	-	-	-	-	-	-	-	-	-	-	-	-	-	-	-	-	-	-	-	-	-	-	-	-	-	-	-	-	-	0.3793 (11/29)	-	-
11	52406928	G	A	9530068E07Rik	ENSMUST00000036952.4	c.649-17G>A		intron_variant	1	-	-	-	-	-	-	-	-	-	-	-	-	-	-	-	-	-	-	-	-	-	-	-	-	-	-	-	-	-	-	-	-	-	-	-	-	-	-	-	-
11	53272028	A	G	Hspa4	ENSMUST00000020630.7	c.1230T>C	p.Ala410Ala	synonymous_variant	1	-	-	-	-	-	-	-	-	-	-	-	-	-	-	-	-	-	0.105 (21/200)	-	-	-	-	-	-	-	-	-	-	-	-	-	-	-	-	-	-	-	-	-	-
11	53332421	T	TC	Zcchc10	ENSMUST00000018383.9	c.366dupC	p.Ser123fs	frameshift_variant	1	-	-	-	-	-	-	-	-	-	-	-	-	-	-	-	-	-	-	-	-	-	-	-	-	-	-	-	-	-	-	-	-	-	-	-	-	-	-	-	-
11	53597992	G	T	Kif3a	ENSMUST00000118353.8	c.1915G>T	p.Asp639Tyr	missense_variant	2	-	-	-	-	-	-	-	-	-	-	-	-	-	0.3836 (61/159)	-	-	-	-	-	-	-	-	-	-	-	-	-	-	-	-	-	-	-	-	-	-	-	-	-	-
11	55495278	G	A	G3bp1	ENSMUST00000018727.3	c.562G>A	p.Glu188Lys	missense_variant	1	-	-	-	-	-	-	-	-	-	-	-	-	-	-	-	-	-	-	-	-	-	-	-	-	-	-	0.1185 (41/346)	-	-	-	-	-	-	-	-	-	-	-	-	-
11	58128743	C	T	Gemin5	ENSMUST00000172035.7	c.3499G>A	p.Ala1167Thr	missense_variant	2	-	-	-	-	-	-	-	0.2794 (19/68)	-	-	-	-	-	-	-	-	-	-	-	-	-	-	-	-	-	-	-	-	-	0.4359 (17/39)	-	-	-	-	-	-	-	-	-	-
11	59038936	G	T	Obscn	ENSMUST00000047441.13	c.15452C>A	p.Ala5151Asp	missense_variant	1	-	-	-	-	-	-	-	-	-	-	-	-	-	-	-	-	-	-	-	-	-	-	-	-	-	-	-	-	-	-	-	0.5 (12/24)	-	-	-	-	-	-	-	-
11	59549637	G	GT	Nlrp3	ENSMUST00000079476.9	c.2046dupT	p.His683fs	frameshift_variant	2	-	-	-	-	-	-	-	-	-	-	-	-	-	-	-	-	-	-	-	-	-	-	-	-	-	-	-	-	-	-	-	-	-	-	0.1346 (7/52)	-	-	-	-	0.25 (6/24)
11	60046342	G	A	Pemt	ENSMUST00000102693.8	c.94C>T	p.Gln32*	stop_gained&splice_region_variant	1	-	-	-	-	-	-	-	-	-	-	-	-	-	-	-	-	-	-	-	-	-	-	-	-	-	-	-	-	-	-	-	-	-	-	-	-	-	-	-	-
11	60187205	G	C	Rai1	ENSMUST00000064190.12	c.2094G>C	p.Gly698Gly	synonymous_variant	1	-	-	-	-	-	-	-	-	-	-	-	-	-	-	-	-	-	-	-	-	-	-	-	-	-	-	-	-	-	-	-	-	-	-	-	-	-	-	-	-
11	60187514	G	T	Rai1	ENSMUST00000064190.12	c.2403G>T	p.Val801Val	synonymous_variant	2	-	-	-	-	-	-	-	-	-	-	-	-	-	-	-	-	-	-	-	-	-	-	-	-	-	-	-	-	-	-	-	-	-	-	-	-	-	-	-	-
11	60201578	A	T	Srebf1	ENSMUST00000020846.7	c.2696+2T>A		splice_donor_variant&intron_variant	1	-	-	-	-	-	-	-	-	-	-	-	-	-	-	-	-	-	-	-	-	-	-	-	-	-	-	-	-	-	-	-	-	-	-	-	-	-	-	-	-
11	60720822	T	G	Flii	ENSMUST00000002889.4	c.1099-37A>C		intron_variant	1	-	-	-	-	-	-	-	-	-	-	-	-	-	-	-	-	-	-	-	-	-	-	-	-	-	-	-	-	-	-	-	-	-	-	-	-	-	-	-	-
11	60778980	A	C	Smcr8	ENSMUST00000056907.6	c.953A>C	p.Lys318Thr	missense_variant	1	-	-	-	-	-	-	-	-	-	0.2632 (5/19)	-	-	-	-	-	-	-	-	-	-	-	-	-	-	-	-	-	-	-	-	-	-	-	-	-	-	-	-	-	-
11	60851917	T	C	Dhrs7b	ENSMUST00000042281.13	c.479T>C	p.Val160Ala	missense_variant	1	-	-	-	-	-	-	-	-	-	-	-	-	-	-	-	-	-	-	-	-	-	-	-	-	-	-	-	-	-	-	-	-	-	-	-	-	-	-	-	-
11	60855752	G	T	Dhrs7b	ENSMUST00000042281.13	c.666G>T	p.Glu222Asp	missense_variant	1	-	-	-	-	-	-	-	-	-	-	-	-	-	-	-	-	-	-	-	-	-	-	-	-	-	-	-	-	-	-	-	-	-	-	-	-	0.1356 (24/177)	-	-	-
11	60943528	G	A	Map2k3	ENSMUST00000019076.9	c.321G>A	p.Leu107Leu	synonymous_variant	2	-	-	-	-	-	-	-	-	-	-	-	-	-	-	-	-	-	-	-	-	-	-	-	-	-	-	-	-	-	-	-	-	-	-	-	-	-	-	-	-
11	61154431	TTC	T	Usp22	ENSMUST00000041683.8	c.*38_*39delGA		3_prime_UTR_variant	1	-	-	-	-	-	-	-	-	-	-	-	-	-	-	-	-	-	-	-	-	-	-	-	-	-	-	-	-	-	-	-	-	-	-	-	-	-	-	-	-
11	61159324	A	T	Usp22	ENSMUST00000041683.8	c.984T>A	p.Ser328Arg	missense_variant	2	-	-	-	-	-	-	-	-	-	-	-	-	-	-	-	-	-	-	-	-	-	-	-	-	-	-	-	-	-	-	-	-	-	-	-	-	-	-	-	-
11	61174811	G	T	Usp22	ENSMUST00000041683.8	c.75C>A	p.His25Gln	missense_variant	1	-	-	-	-	-	-	-	-	-	-	-	-	-	-	-	-	-	-	-	-	-	-	-	-	-	-	-	-	-	-	-	-	-	-	-	-	-	-	-	-
11	61915256	C	T	Akap10	ENSMUST00000102650.9	c.645G>A	p.Leu215Leu	synonymous_variant	1	-	-	-	-	-	-	-	-	-	-	-	-	-	-	-	-	-	-	-	0.4583 (11/24)	-	-	-	-	-	-	-	-	-	-	-	-	-	-	-	-	-	-	-	-
11	62077226	G	A	Specc1	ENSMUST00000108709.7	c.280+34151G>A		intron_variant	1	-	-	-	-	-	-	-	-	-	-	-	-	-	-	-	-	-	-	-	-	-	-	-	-	-	-	-	-	-	-	-	-	-	-	-	-	-	-	-	-
11	62321003	A	C	Ncor1	ENSMUST00000018645.12	c.6993T>G	p.Pro2331Pro	synonymous_variant	2	-	-	-	-	-	-	-	-	-	-	-	-	-	-	-	-	-	-	-	-	-	-	-	-	-	-	-	-	-	-	-	-	-	-	-	-	-	-	-	-
11	62321003	A	C	Ttc19	ENSMUSG00000042298	n.62321003A>C		intragenic_variant	2	-	-	-	-	-	-	-	-	-	-	-	-	-	-	-	-	-	-	-	-	-	-	-	-	-	-	-	-	-	-	-	-	-	-	-	-	-	-	-	-
11	62325468	G	GA	Ncor1	ENSMUST00000018645.12	c.6724+18dupT		intron_variant	1	-	-	-	-	-	-	-	-	-	-	-	-	-	-	-	-	-	-	-	-	-	-	-	-	-	-	-	-	-	-	-	-	-	-	-	-	-	-	-	-
11	62325468	G	GA	Ttc19	ENSMUSG00000042298	n.62325476dupA		intragenic_variant	1	-	-	-	-	-	-	-	-	-	-	-	-	-	-	-	-	-	-	-	-	-	-	-	-	-	-	-	-	-	-	-	-	-	-	-	-	-	-	-	-
11	62879470	C	T	Tvp23b	ENSMUST00000014321.4	c.-114C>T		5_prime_UTR_variant	1	-	-	-	-	-	-	-	-	-	-	-	-	-	-	-	-	-	-	-	-	-	-	-	-	-	-	-	-	-	-	-	-	-	-	-	-	-	-	-	-
11	65992889	G	T	Dnah9	ENSMUST00000080665.9	c.7547-20C>A		intron_variant	1	-	-	-	-	-	-	-	-	-	-	-	-	-	-	-	-	-	-	-	-	-	-	-	-	-	-	-	-	-	-	-	-	-	-	-	-	-	-	-	-
11	67186782	A	C	Myh2	ENSMUST00000018641.7	c.2700+42A>C		intron_variant	1	-	-	-	-	-	-	-	-	-	-	-	-	-	-	-	-	-	-	-	-	-	-	-	-	-	-	-	-	-	-	-	-	-	-	-	-	-	-	-	-
11	67188412	T	C	Myh2	ENSMUST00000018641.7	c.2805T>C	p.Asp935Asp	synonymous_variant	1	-	-	-	-	-	-	-	-	-	-	-	-	-	-	-	-	-	-	-	-	-	-	-	-	-	-	-	-	-	-	-	-	0.3846 (10/26)	-	-	-	-	-	-	-
11	67194633	G	A	Myh2	ENSMUST00000018641.7	c.5382G>A	p.Glu1794Glu	synonymous_variant	1	-	-	-	-	-	-	-	-	-	-	-	-	-	-	-	-	-	-	-	-	-	-	-	-	-	-	-	-	-	-	-	-	0.2542 (15/59)	-	-	-	-	-	-	-
11	67214820	A	T	Myh1	ENSMUST00000018637.14	c.3350A>T	p.Glu1117Val	missense_variant	1	-	-	-	-	-	-	-	-	-	-	-	-	-	-	-	-	-	-	-	-	-	-	-	-	-	-	-	-	-	-	-	-	-	-	-	-	-	-	-	-
11	67214820	A	T	Gm12300	ENSMUST00000145021.1	n.184-1908T>A		intron_variant	1	-	-	-	-	-	-	-	-	-	-	-	-	-	-	-	-	-	-	-	-	-	-	-	-	-	-	-	-	-	-	-	-	-	-	-	-	-	-	-	-
11	67353640	A	C	Myh13	ENSMUST00000081911.11	c.3002A>C	p.Lys1001Thr	missense_variant	1	-	-	-	-	-	-	-	-	-	-	-	-	-	-	-	-	-	-	-	-	-	-	-	-	-	-	-	-	-	-	-	-	-	-	-	-	-	-	-	-
11	68803012	T	A	Myh10	ENSMUST00000092984.5	c.4649T>A	p.Met1550Lys	missense_variant	1	-	-	-	-	0.6503 (93/143)	-	-	-	-	-	-	-	-	-	-	-	-	-	-	-	-	-	-	-	-	-	-	-	-	-	-	-	-	-	-	-	-	-	-	-
11	69404787	T	C	Kdm6b	ENSMUST00000094077.4	c.2653A>G	p.Arg885Gly	missense_variant	1	-	-	-	-	-	-	-	-	-	-	-	-	-	-	-	-	-	-	-	-	-	-	-	-	-	-	-	-	-	-	-	-	-	-	-	-	-	-	-	-
11	69741606	GTCCTTTTTTTTTTCTTTTCCATT	G	Polr2a	ENSMUST00000058470.15	c.3034+8_3034+30delAATGGAAAAGAAAAAAAAAAGGA		splice_region_variant&intron_variant	1	-	-	-	-	-	-	-	-	-	-	-	-	-	0.1111 (6/54)	-	-	-	-	-	-	-	-	-	-	-	-	-	-	-	-	-	-	-	-	-	-	-	-	-	-
11	69856000	A	C	Tnk1	ENSMUST00000108628.7	c.493T>G	p.Phe165Val	missense_variant	1	-	-	-	-	-	-	-	-	-	-	-	-	-	-	-	-	-	-	-	-	-	-	-	-	-	-	-	-	-	-	-	-	-	-	-	-	-	-	-	-
11	69900399	C	G	2810408A11Rik	ENSMUST00000102580.9	c.353G>C	p.Ser118Thr	missense_variant	1	-	-	-	-	-	-	-	-	-	-	-	-	-	-	-	-	-	-	-	-	-	-	-	-	-	-	-	-	-	-	-	-	-	-	-	-	-	-	-	-
11	69984454	G	A	Ctdnep1	ENSMUST00000108593.7	c.208G>A	p.Glu70Lys	missense_variant	1	-	-	-	-	-	-	-	-	-	-	-	-	-	-	-	-	-	-	-	-	-	-	-	-	-	-	-	-	-	-	-	-	-	-	-	-	-	-	-	-
11	70682489	A	C	Camta2	ENSMUST00000036299.13	c.687T>G	p.Thr229Thr	synonymous_variant	2	-	-	-	-	-	-	-	-	-	-	-	-	-	-	-	-	-	-	-	-	-	-	-	-	-	-	-	-	-	-	-	-	-	-	-	-	-	-	-	-
11	71113519	T	C	Nlrp1a	ENSMUST00000048514.10	c.2282A>G	p.Lys761Arg	missense_variant	1	-	-	-	-	-	-	-	-	-	-	-	-	-	-	-	-	-	-	-	-	-	-	-	-	-	-	-	-	-	-	-	-	-	-	1.0 (14/14)	-	-	-	-	-
11	71113599	A	G	Nlrp1a	ENSMUST00000048514.10	c.2202T>C	p.Leu734Leu	synonymous_variant	1	-	-	-	-	-	-	-	-	-	-	-	-	-	-	-	-	-	-	-	-	-	-	-	-	-	-	-	-	-	-	-	-	-	-	-	-	-	-	-	-
11	71156302	G	A	Nlrp1b	ENSMUST00000108514.9	c.3242-10C>T		intron_variant	1	-	-	-	-	-	-	-	-	-	-	-	-	-	-	-	-	-	-	-	-	-	-	-	-	-	-	-	-	-	-	-	-	-	-	-	-	-	-	-	-
11	72207769	G	C	Txndc17	ENSMUST00000021158.3	c.145+1G>C		splice_donor_variant&intron_variant	2	-	-	-	-	-	-	-	-	-	-	-	-	-	-	-	-	-	-	-	-	-	-	-	-	-	-	-	-	-	-	-	-	-	-	-	-	-	-	-	-
11	72991878	C	A	Atp2a3	ENSMUST00000021142.7	c.*126C>A		3_prime_UTR_variant	1	-	-	-	-	-	-	-	-	-	-	-	-	-	-	-	-	-	-	-	-	-	-	-	-	-	-	-	-	-	-	-	-	-	-	-	-	-	-	-	-
11	75169255	T	A	Hic1	ENSMUST00000055619.4	c.265A>T	p.Ser89Cys	missense_variant	1	-	-	-	-	-	-	-	-	-	-	-	-	-	-	-	-	-	-	-	-	-	-	-	-	-	-	-	-	-	-	-	-	-	-	-	-	-	-	-	-
11	75506613	T	C	Prpf8	ENSMUST00000018449.10	c.6227+44T>C		intron_variant	1	-	-	-	-	-	-	-	-	-	-	-	-	-	-	-	-	-	-	-	-	-	-	-	0.1133 (17/150)	-	-	-	-	-	-	-	-	-	-	-	-	-	-	-	-
11	75633170	T	G	Inpp5k	ENSMUST00000006286.8	c.200T>G	p.Ile67Ser	missense_variant	2	-	-	-	-	-	-	-	-	-	-	-	-	-	-	-	-	-	-	-	-	0.2059 (14/68)	-	-	-	-	-	-	-	-	-	-	-	-	-	-	-	-	-	-	-
11	75645543	C	G	Inpp5k	ENSMUST00000006286.8	c.946C>G	p.Leu316Val	missense_variant	2	-	-	-	-	-	-	-	-	-	-	-	-	-	-	-	-	-	0.3 (15/50)	-	-	-	-	-	-	-	-	0.4314 (22/51)	-	-	-	-	-	-	-	-	-	-	-	-	-
11	75671171	CTG	C	Myo1c	ENSMUST00000102505.9	c.2611-18_2611-17delGT		intron_variant	1	-	-	-	-	-	-	-	-	-	-	-	-	-	-	-	-	-	-	-	-	-	-	-	-	-	-	-	-	-	-	-	-	-	-	-	-	-	-	-	-
11	75671172	TG	T	Myo1c	ENSMUST00000102505.9	c.2611-20delG		intron_variant	1	-	-	-	-	-	-	-	-	-	-	-	-	-	-	-	-	-	-	-	-	-	-	-	-	-	-	-	-	-	-	-	-	-	-	-	-	-	-	-	-
11	77076661	T	A	Nsrp1	ENSMUST00000102494.7	c.104A>T	p.Asp35Val	missense_variant	1	-	-	-	-	-	-	-	-	-	-	-	-	-	-	-	-	-	-	-	-	-	-	-	-	-	-	-	-	-	-	-	-	-	-	0.1013 (8/79)	-	-	-	-	-
11	78191207	G	A	Rab34	ENSMUST00000150941.7	c.450-1G>A		splice_acceptor_variant&intron_variant	1	-	-	-	-	-	-	-	-	-	-	-	-	-	-	-	-	-	-	-	-	-	-	-	-	-	-	-	-	-	-	-	-	-	-	-	-	-	-	-	-
11	78266577	G	C	2610507B11Rik	ENSMUST00000010421.6	c.891-18G>C		intron_variant	1	-	-	-	-	-	-	-	-	-	-	-	-	-	-	-	-	-	-	-	-	-	-	-	-	-	-	-	-	-	-	-	-	-	-	-	-	-	-	-	-
11	78268715	T	C	2610507B11Rik	ENSMUST00000010421.6	c.1589T>C	p.Leu530Pro	missense_variant	1	-	-	-	-	-	-	-	-	-	0.3357 (47/140)	-	-	-	-	-	-	-	-	-	-	-	-	-	-	-	-	-	-	-	-	-	-	-	-	-	-	-	-	-	-
11	78305174	C	T	Spag5	ENSMUST00000045026.3	c.1204C>T	p.Arg402*	stop_gained	1	-	-	-	-	-	-	-	-	-	-	-	-	-	-	-	-	-	-	-	-	-	-	-	-	-	-	-	-	-	-	-	-	-	-	-	-	-	-	-	-
11	79436777	T	G	Nf1	ENSMUST00000071325.8	c.1809T>G	p.Ile603Met	missense_variant	1	-	-	-	-	-	-	-	-	-	-	-	-	-	-	-	-	-	-	-	-	-	-	-	-	-	-	-	-	-	-	-	-	-	-	-	-	-	-	-	-
11	82958756	T	A	Slfn5	ENSMUST00000067443.8	c.1080T>A	p.His360Gln	missense_variant	2	-	-	-	-	-	-	-	-	-	-	-	-	-	-	-	-	-	-	-	0.6129 (19/31)	-	-	-	-	-	-	-	-	-	-	-	-	-	-	-	-	-	-	-	0.4 (6/15)
11	82958756	T	A	Slfn5os	ENSMUST00000127074.1	n.77+1849A>T		intron_variant	2	-	-	-	-	-	-	-	-	-	-	-	-	-	-	-	-	-	-	-	0.6129 (19/31)	-	-	-	-	-	-	-	-	-	-	-	-	-	-	-	-	-	-	-	0.4 (6/15)
11	83029139	T	G	Slfn10-ps	ENSMUST00000100716.10	n.2612A>C		non_coding_transcript_exon_variant	1	-	-	-	-	-	-	-	-	-	-	-	-	-	-	-	-	-	-	-	-	-	-	-	-	-	-	-	-	-	-	-	-	-	-	0.2963 (8/27)	-	-	-	-	-
11	83029147	A	G	Slfn10-ps	ENSMUST00000100716.10	n.2604T>C		non_coding_transcript_exon_variant	1	-	-	-	-	-	-	-	-	-	-	-	-	-	-	-	-	-	-	-	-	-	-	-	-	-	-	-	-	-	-	-	-	-	-	0.25 (7/28)	-	-	-	-	-
11	83029159	T	A	Slfn10-ps	ENSMUST00000100716.10	n.2592A>T		non_coding_transcript_exon_variant	1	-	-	-	-	-	-	-	-	-	-	-	-	-	-	-	-	-	-	-	-	-	-	-	-	-	-	-	-	-	-	-	-	-	-	0.2222 (6/27)	-	-	-	-	-
11	83032267	G	C	Slfn10-ps	ENSMUST00000100716.10	n.1323C>G		non_coding_transcript_exon_variant	1	-	-	-	-	-	-	-	-	-	-	-	-	-	-	-	-	-	-	-	-	-	-	-	-	-	-	-	-	-	-	-	-	-	-	0.3529 (6/17)	-	-	-	-	-
11	83187403	A	G	Slfn4	ENSMUST00000000208.11	c.1016A>G	p.His339Arg	missense_variant	1	-	-	-	-	-	-	-	-	-	-	-	-	-	-	-	-	-	-	-	0.1702 (8/47)	-	-	-	-	-	-	-	-	-	-	-	-	-	-	-	-	-	-	-	-
11	83188739	G	C	Slfn4	ENSMUST00000000208.11	c.1254G>C	p.Gln418His	missense_variant	1	-	-	-	-	-	-	-	-	-	-	-	-	-	-	-	-	-	-	-	0.1923 (5/26)	-	-	-	-	-	-	-	-	-	-	-	-	-	-	-	-	-	-	-	-
11	83188768	G	T	Slfn4	ENSMUST00000000208.11	c.1283G>T	p.Arg428Leu	missense_variant	1	-	-	-	-	-	-	-	-	-	-	-	-	-	-	-	-	-	-	-	0.1316 (5/38)	-	-	-	-	-	-	-	-	-	-	-	-	-	-	-	-	-	-	-	-
11	83188790	C	T	Slfn4	ENSMUST00000000208.11	c.1305C>T	p.Ser435Ser	synonymous_variant	1	-	-	-	-	-	-	-	-	-	-	-	-	-	-	-	-	-	-	-	0.2712 (16/59)	-	-	-	-	-	-	-	-	-	-	-	-	-	-	-	-	-	-	-	-
11	83213087	T	G	Slfn3	ENSMUST00000019130.7	c.414T>G	p.Cys138Trp	missense_variant	1	-	-	-	-	-	-	-	-	-	-	-	-	-	-	-	-	-	-	-	-	-	-	-	-	-	-	-	-	-	-	-	-	-	-	-	-	-	-	-	0.3529 (6/17)
11	83213270	T	A	Slfn3	ENSMUST00000019130.7	c.597T>A	p.Asp199Glu	missense_variant	1	-	-	-	-	-	-	-	-	-	-	-	-	-	-	-	-	-	-	-	-	-	-	-	-	-	-	-	-	-	-	-	-	-	-	-	-	-	-	-	0.2692 (7/26)
11	83213306	G	A	Slfn3	ENSMUST00000019130.7	c.633G>A	p.Thr211Thr	synonymous_variant	2	-	-	-	-	-	-	-	-	-	-	-	-	-	-	-	-	-	-	-	0.3333 (7/21)	-	-	-	-	-	-	-	-	-	-	-	-	-	-	-	-	-	-	-	0.32 (8/25)
11	83214610	A	G	Slfn3	ENSMUST00000019130.7	c.1063A>G	p.Ile355Val	missense_variant	3	-	-	-	-	-	-	-	-	-	-	-	-	-	-	-	-	-	0.3333 (6/18)	-	0.6 (9/15)	-	-	-	-	-	-	-	-	-	-	-	-	-	-	-	-	-	-	-	0.2222 (4/18)
11	83214615	C	T	Slfn3	ENSMUST00000019130.7	c.1068C>T	p.Ser356Ser	synonymous_variant	2	-	-	-	-	-	-	-	-	-	-	-	-	-	-	-	-	-	0.3158 (6/19)	-	0.4375 (7/16)	-	-	-	-	-	-	-	-	-	-	-	-	-	-	-	-	-	-	-	-
11	85822034	G	GA	Bcas3	ENSMUST00000108061.7	c.2727dupA	p.Gln910fs	frameshift_variant	1	-	-	-	-	-	-	-	-	-	-	-	-	-	-	-	-	-	-	-	-	-	-	-	-	-	-	-	-	-	-	-	-	-	-	-	-	-	-	-	-
11	85822034	G	GA	2610027K06Rik	ENSMUST00000140673.7	n.42+10133dupT		intron_variant	1	-	-	-	-	-	-	-	-	-	-	-	-	-	-	-	-	-	-	-	-	-	-	-	-	-	-	-	-	-	-	-	-	-	-	-	-	-	-	-	-
11	86308880	A	G	Med13	ENSMUST00000043624.8	c.2000T>C	p.Val667Ala	missense_variant	2	-	-	-	-	-	-	-	-	-	-	-	-	-	-	-	-	-	-	-	-	-	-	-	-	-	-	-	-	-	-	-	-	-	-	-	-	-	-	-	-
11	86549469	C	T	Tubd1	ENSMUST00000020821.9	c.318C>T	p.Tyr106Tyr	splice_region_variant&synonymous_variant	2	-	-	-	-	-	-	-	-	-	-	-	-	-	-	-	-	-	-	-	-	0.5172 (15/29)	-	-	-	-	-	-	-	-	-	-	-	-	-	-	-	-	-	-	-
11	87077881	T	TA	Smg8	ENSMUST00000020801.13	c.*71dupT		3_prime_UTR_variant	2	-	-	-	-	-	-	-	-	-	-	-	-	-	-	-	-	-	-	-	-	-	-	-	-	-	-	-	-	-	-	-	-	-	-	-	-	-	-	-	-
11	87735482	T	C	Rnf43	ENSMUST00000092800.11	c.*1283T>C		3_prime_UTR_variant	1	-	-	-	-	-	-	-	-	-	-	-	-	-	-	-	-	-	-	-	-	-	-	-	-	-	-	-	-	-	-	-	-	-	-	-	-	-	-	-	-
11	90264580	A	G	Mmd	ENSMUST00000004050.6	c.344+3A>G		splice_region_variant&intron_variant	1	-	-	-	-	-	-	-	-	-	-	-	-	-	-	-	-	-	-	-	-	0.2486 (44/177)	-	-	-	-	-	-	-	-	-	-	-	-	-	-	-	-	-	-	-
11	90264580	A	G	RP23-220F20.4	ENSMUST00000210131.1	n.681+3A>G		splice_region_variant&intron_variant	1	-	-	-	-	-	-	-	-	-	-	-	-	-	-	-	-	-	-	-	-	0.2486 (44/177)	-	-	-	-	-	-	-	-	-	-	-	-	-	-	-	-	-	-	-
11	94503275	G	GT	Mycbpap	ENSMUST00000093945.9	c.2547dupA	p.Leu850fs	frameshift_variant	1	-	-	-	-	-	-	-	-	-	-	-	-	-	-	-	-	-	-	-	-	-	-	-	-	-	-	-	-	-	-	-	-	-	-	-	-	-	-	-	-
11	94943587	T	A	Col1a1	ENSMUST00000001547.7	c.1582-3T>A		splice_region_variant&intron_variant	1	-	-	-	-	-	-	-	-	-	-	-	-	-	-	-	-	-	-	-	-	-	-	-	-	-	-	-	-	-	-	-	-	-	-	-	-	-	-	-	-
11	96346105	C	T	Hoxb3	ENSMUST00000055334.2	c.1008C>T	p.Val336Val	synonymous_variant	1	-	-	-	-	-	-	-	-	-	-	-	-	-	-	-	-	-	-	-	-	-	-	-	-	-	-	-	-	-	-	-	-	-	-	-	-	-	-	-	-
11	96346105	C	T	Hoxb3os	ENSMUST00000131275.2	n.1691G>A		non_coding_transcript_exon_variant	1	-	-	-	-	-	-	-	-	-	-	-	-	-	-	-	-	-	-	-	-	-	-	-	-	-	-	-	-	-	-	-	-	-	-	-	-	-	-	-	-
11	96808115	T	C	Cbx1	ENSMUST00000093943.9	c.*5-69T>C		intron_variant	1	-	-	-	-	-	-	-	-	-	-	-	-	-	-	-	-	-	-	-	-	-	-	-	-	-	-	-	-	-	-	-	-	-	-	-	-	-	-	-	-
11	96827736	T	A	Nfe2l1	ENSMUSG00000038615	n.96827736A>T		intragenic_variant	1	-	-	-	-	-	-	-	-	-	-	-	-	-	-	-	-	-	-	-	-	-	-	-	-	-	-	-	-	-	-	-	-	-	-	-	-	-	-	-	-
11	97321624	C	CT	Mrpl45	ENSMUST00000019026.9	c.362+75dupT		intron_variant	1	-	-	-	-	-	-	-	-	-	-	-	-	-	-	-	-	-	-	-	-	-	-	-	-	-	-	-	-	-	-	-	-	-	-	-	-	-	-	-	-
11	97674456	A	C	Mllt6	ENSMUST00000107586.2	c.1721A>C	p.Lys574Thr	missense_variant	1	-	-	-	-	-	-	-	-	-	-	-	-	-	-	-	-	-	-	-	-	-	-	-	-	-	-	-	-	-	-	-	-	-	-	-	-	-	-	-	-
11	98027021	G	A	Rpl19	ENSMUST00000017548.6	c.5+31G>A		intron_variant	3	-	-	-	-	-	-	-	-	-	-	-	-	-	-	-	0.8857 (31/35)	-	-	-	-	-	-	-	-	-	-	-	-	-	-	-	-	-	-	0.9286 (13/14)	-	-	-	-	-
11	98210412	ATCT	A	Cdk12	ENSMUST00000107538.1	c.1099_1101delTCT	p.Ser367del	conservative_inframe_deletion	1	-	-	-	-	-	-	-	-	-	-	-	-	-	-	-	-	-	-	-	-	-	0.2195 (9/41)	-	-	-	-	-	-	-	-	-	-	-	-	-	-	-	-	-	-
11	98632957	C	A	Gsdma3	ENSMUST00000073295.2	c.715C>A	p.Pro239Thr	missense_variant	1	-	-	-	-	-	-	-	-	-	-	-	-	-	-	-	-	-	-	-	-	-	-	-	-	-	-	-	-	-	-	-	-	-	-	-	-	-	-	-	-
11	99007198	A	G	Top2a	ENSMUST00000068031.7	c.2141T>C	p.Ile714Thr	missense_variant	1	-	-	-	-	-	-	-	-	-	-	-	-	-	-	-	-	-	-	-	-	-	-	-	-	-	-	-	-	-	-	-	-	-	-	-	-	-	-	-	-
11	99213114	G	A	Smarce1	ENSMUST00000103133.3	c.1027+6C>T		splice_region_variant&intron_variant	1	-	-	-	-	-	-	-	-	-	-	-	-	-	-	-	-	-	-	-	-	-	-	-	-	-	-	-	-	-	-	-	-	-	-	-	-	-	-	-	-
11	99591218	G	A	Krtap1-3	ENSMUST00000104930.1	c.102C>T	p.Cys34Cys	synonymous_variant	1	-	-	-	-	-	-	-	-	-	-	0.32 (8/25)	-	-	-	-	-	-	-	-	-	-	-	-	-	-	-	-	-	-	-	-	-	-	-	-	-	-	-	-	-
11	100047731	G	C	Krt31	ENSMUST00000007318.1	c.1035C>G	p.Val345Val	synonymous_variant	1	-	-	-	-	-	-	-	-	-	-	-	-	-	-	-	-	-	-	-	-	-	-	-	-	-	-	-	-	-	-	-	-	-	-	-	-	-	-	-	-
11	100047764	A	C	Krt31	ENSMUST00000007318.1	c.1002T>G	p.Arg334Arg	synonymous_variant	1	-	-	-	-	-	-	-	-	-	-	-	-	-	-	-	-	-	-	-	-	-	-	-	-	-	-	-	-	-	-	-	-	-	-	-	-	-	-	-	-
11	100047765	C	T	Krt31	ENSMUST00000007318.1	c.1001G>A	p.Arg334His	missense_variant	1	-	-	-	-	-	-	-	-	-	-	-	-	-	-	-	-	-	-	-	-	-	-	-	-	-	-	-	-	-	-	-	-	-	-	-	-	-	-	-	-
11	100048125	T	C	Krt31	ENSMUST00000007318.1	c.869A>G	p.His290Arg	missense_variant	1	-	-	-	-	-	-	-	-	-	-	-	-	-	-	-	-	-	-	-	-	-	-	-	-	-	-	-	-	-	-	-	-	-	-	-	-	-	-	-	-
11	100118775	T	C	Krt13	ENSMUST00000007275.2	c.1178A>G	p.Glu393Gly	missense_variant	1	-	-	-	-	-	-	-	-	-	-	-	-	-	-	-	-	-	-	-	-	-	-	-	0.1053 (12/114)	-	-	-	-	-	-	-	-	-	-	-	-	-	-	-	-
11	100207260	C	A	Krt14	ENSMUST00000007272.7	c.196G>T	p.Gly66Trp	missense_variant	1	-	-	-	-	-	-	-	-	-	-	-	-	-	-	-	-	-	-	-	-	-	-	-	-	-	-	-	-	-	-	-	-	-	-	-	-	-	-	-	-
11	100257349	G	GA	Krt17	ENSMUST00000080893.6	c.1182-5dupT		splice_region_variant&intron_variant	1	-	-	-	-	-	-	-	-	-	-	-	-	-	-	-	-	-	-	-	-	-	-	-	-	-	-	-	-	-	-	-	-	0.1923 (5/26)	-	-	-	-	-	-	-
11	100265699	G	A	Krt42	ENSMUST00000017270.7	c.765C>T	p.Pro255Pro	synonymous_variant	2	-	0.1429 (4/28)	-	-	-	-	-	-	-	-	-	-	-	-	-	-	-	-	-	-	-	-	-	-	-	-	-	-	-	0.1481 (8/54)	-	-	-	-	-	-	-	-	-	-
11	100266992	T	C	Krt42	ENSMUST00000017270.7	c.645A>G	p.Glu215Glu	synonymous_variant	1	-	-	-	-	-	-	-	-	-	-	-	-	-	-	-	-	-	-	-	-	-	-	-	-	-	-	-	-	-	-	-	-	-	-	-	-	-	-	-	-
11	100716890	AT	A	Rab5c	ENSMUST00000019317.11	c.456delA	p.Cys153fs	frameshift_variant	1	-	-	-	-	-	-	-	-	-	-	-	-	-	-	-	-	-	-	-	-	-	-	-	-	-	-	-	-	-	-	-	-	-	-	-	-	-	-	-	-
11	100720114	G	C	Rab5c	ENSMUST00000019317.11	c.-34C>G		5_prime_UTR_variant	1	-	-	-	-	-	-	-	-	-	0.241 (80/332)	-	-	-	-	-	-	-	-	-	-	-	-	-	-	-	-	-	-	-	-	-	-	-	-	-	-	-	-	-	-
11	100769784	AC	A	Ghdc	ENSMUST00000017891.13	c.269-8delG		splice_region_variant&intron_variant	1	-	-	-	-	-	-	-	-	-	-	-	-	-	-	-	-	-	-	-	-	-	-	-	-	-	-	-	-	-	-	-	-	-	-	-	-	-	-	-	-
11	100783097	C	A	Stat5b	ENSMUST00000004143.2	c.2360G>T	p.Ter787Leuext*?	stop_lost	1	-	-	-	-	-	-	-	-	-	-	-	-	-	-	-	-	-	-	-	-	-	-	-	-	-	-	-	-	-	-	-	-	-	-	-	-	-	-	-	-
11	100970598	G	C	Ptrf	ENSMUST00000060792.5	c.-132C>G		5_prime_UTR_variant	1	-	-	-	-	-	-	-	-	-	-	-	-	-	0.5385 (7/13)	-	-	-	-	-	-	-	-	-	-	-	-	-	-	-	-	-	-	-	-	-	-	-	-	-	-
11	101086303	G	A	Coasy	ENSMUST00000001806.9	c.1685G>A	p.Arg562Lys	missense_variant	1	-	-	-	-	-	-	-	-	-	-	-	-	-	0.1228 (7/57)	-	-	-	-	-	-	-	-	-	-	-	-	-	-	-	-	-	-	-	-	-	-	-	-	-	-
11	101192962	C	A	Ezh1	ENSMUST00000107285.7	c.2230G>T	p.Glu744*	stop_gained	1	-	-	-	-	-	-	-	-	-	-	-	-	-	-	-	-	-	-	-	-	-	-	-	-	-	-	-	-	-	-	-	-	-	-	-	-	-	-	-	-
11	101279392	C	T	Cntd1	ENSMUST00000103107.4	c.87C>T	p.Asn29Asn	synonymous_variant	1	-	-	-	-	-	-	-	-	-	-	-	-	-	-	-	-	-	-	-	-	-	-	-	-	-	-	-	-	-	-	-	-	-	-	-	-	-	-	-	-
11	101295016	C	T	Becn1	ENSMUST00000130916.7	c.631G>A	p.Glu211Lys	missense_variant	2	-	-	-	-	-	-	-	-	-	-	-	-	-	-	-	-	0.303 (50/165)	-	-	-	-	-	-	-	-	-	-	-	-	-	-	-	-	-	-	-	-	-	-	-
11	101295016	C	T	Cntd1	ENSMUSG00000078653	n.101295016C>T		intragenic_variant	2	-	-	-	-	-	-	-	-	-	-	-	-	-	-	-	-	0.303 (50/165)	-	-	-	-	-	-	-	-	-	-	-	-	-	-	-	-	-	-	-	-	-	-	-
11	101443890	G	A	Rpl27	ENSMUST00000077856.12	c.251+220G>A		intron_variant	1	-	-	-	-	-	-	-	-	-	-	-	-	-	-	-	-	-	-	-	-	-	0.4167 (5/12)	-	-	-	-	-	-	-	-	-	-	-	-	-	-	-	-	-	-
11	101458059	C	T	Ifi35	ENSMUST00000010502.12	c.669+62C>T		intron_variant	1	-	-	-	-	-	0.1515 (5/33)	-	-	-	-	-	-	-	-	-	-	-	-	-	-	-	-	-	-	-	-	-	-	-	-	-	-	-	-	-	-	-	-	-	-
11	101628303	G	A	Rdm1	ENSMUST00000010506.9	c.127G>A	p.Gly43Ser	missense_variant	2	0.1978 (18/91)	-	-	-	-	-	-	-	-	-	-	-	-	-	-	-	-	-	-	-	-	-	-	-	-	-	-	-	-	-	-	-	0.131 (11/84)	-	-	-	-	-	-	-
11	102205635	G	C	Hdac5	ENSMUST00000008999.11	c.803-4C>G		splice_region_variant&intron_variant	2	-	-	-	-	-	-	-	-	-	-	-	-	-	-	-	-	-	-	-	-	-	-	-	-	-	-	-	-	-	-	-	-	-	-	-	-	-	-	-	-
11	102291539	C	T	Atxn7l3	ENSMUST00000107132.2	c.*116G>A		3_prime_UTR_variant	2	-	0.9565 (22/23)	-	-	-	-	-	-	-	-	1.0 (26/26)	-	-	-	-	-	-	-	-	-	-	-	-	-	-	-	-	-	-	-	-	-	-	-	-	-	-	-	-	-
11	102476585	G	GA	Gpatch8	ENSMUST00000143842.1	c.*1607dupT		3_prime_UTR_variant	1	-	-	-	-	-	-	-	-	-	-	-	-	-	-	-	-	-	-	-	-	-	-	-	-	-	-	-	-	-	-	-	-	-	-	-	-	0.2593 (7/27)	-	-	-
11	102776289	C	A	Adam11	ENSMUST00000068150.6	c.1794-27C>A		intron_variant	1	-	-	-	-	-	-	-	-	-	-	-	-	-	-	-	-	-	-	-	-	-	-	-	-	-	-	-	-	-	-	-	-	-	-	-	-	-	-	-	-
11	103118269	TTC	T	Hexim1	ENSMUST00000053063.6	c.*279_*280delCT		3_prime_UTR_variant	1	-	-	-	-	-	-	-	-	-	-	-	-	-	-	-	-	-	-	-	-	-	-	-	-	-	-	-	-	-	-	-	-	-	-	-	-	-	-	-	-
11	104305354	T	C	Mapt	ENSMUST00000106989.2	c.1292T>C	p.Val431Ala	missense_variant	1	-	-	-	-	-	-	-	-	-	-	-	-	-	-	-	-	-	-	-	-	-	-	-	-	-	-	-	-	-	-	-	-	-	-	-	0.2258 (21/93)	-	-	-	-
11	105139677	T	C	Mettl2	ENSMUST00000021030.7	c.1078T>C	p.Cys360Arg	missense_variant	2	-	-	-	-	-	-	-	-	-	-	-	-	-	-	-	-	-	0.2286 (8/35)	-	-	-	-	-	-	-	-	0.1277 (6/47)	-	-	-	-	-	-	-	-	-	-	-	-	-
11	105913406	G	C	Tanc2	ENSMUST00000100330.9	c.3593G>C	p.Ser1198Thr	missense_variant	1	-	-	-	-	-	-	-	-	-	-	-	-	-	-	-	-	-	-	-	-	-	-	-	-	-	-	-	-	-	-	-	-	-	-	-	-	-	-	-	-
11	105988023	G	T	Ace	ENSMUST00000001963.13	c.3403G>T	p.Val1135Phe	missense_variant	1	-	-	-	-	-	-	-	-	-	-	-	-	-	-	-	-	-	-	-	-	-	-	-	-	-	-	-	-	-	-	-	-	-	-	-	-	-	-	-	-
11	105988189	A	C	Ace	ENSMUST00000001963.13	c.3518+51A>C		intron_variant	1	-	-	-	-	-	-	-	-	-	-	-	-	-	-	-	-	-	-	-	-	-	-	-	-	-	-	-	-	-	-	-	-	-	-	-	-	-	-	-	-
11	106775466	T	G	Polg2	ENSMUST00000021060.5	c.852A>C	p.Glu284Asp	missense_variant	1	-	-	-	-	-	-	-	-	-	0.35 (7/20)	-	-	-	-	-	-	-	-	-	-	-	-	-	-	-	-	-	-	-	-	-	-	-	-	-	-	-	-	-	-
11	106801564	C	A	Cep95	ENSMUST00000018516.10	c.569C>A	p.Ser190Tyr	missense_variant	1	-	-	-	-	-	-	-	-	-	-	-	-	-	-	-	-	-	-	-	-	-	-	-	-	-	-	-	-	-	-	-	-	-	-	-	-	-	-	-	-
11	106856199	T	C	Smurf2	ENSMUST00000092517.8	c.551A>G	p.Gln184Arg	missense_variant	2	-	-	-	-	-	-	-	-	-	-	-	-	-	-	-	-	-	-	-	-	-	-	-	-	-	-	-	-	-	-	-	-	-	-	-	-	-	-	-	-
11	106989322	A	C	Kpna2	ENSMUST00000018506.12	c.1497+2T>G		splice_donor_variant&intron_variant	1	-	-	-	-	-	-	-	-	-	-	-	-	-	-	-	0.2857 (4/14)	-	-	-	-	-	-	-	-	-	-	-	-	-	-	-	-	-	-	-	-	-	-	-	-
11	107603001	C	CA	Helz	ENSMUST00000075012.7	c.828dupA	p.Ser277fs	frameshift_variant	1	-	-	-	-	-	-	-	-	-	-	-	-	-	-	-	-	-	-	-	-	-	-	-	-	-	-	-	-	-	-	-	-	-	-	-	-	-	-	-	-
11	109227134	T	G	Rgs9	ENSMUST00000020920.9	c.1869A>C	p.Lys623Asn	missense_variant	1	-	-	-	-	-	-	-	-	-	-	-	-	-	-	-	-	-	-	-	-	-	-	-	-	-	-	-	-	-	-	-	-	-	-	-	-	-	-	-	-
11	109936855	C	T	Abca8b	ENSMUST00000020948.14	c.4365-39G>A		intron_variant	1	-	-	-	-	-	-	-	-	-	-	-	-	-	-	-	-	-	-	-	-	-	-	-	-	-	-	-	-	-	-	-	-	-	-	-	-	-	-	-	-
11	109936855	C	T	Gm11697	ENSMUST00000149226.1	n.118+422C>T		intron_variant	1	-	-	-	-	-	-	-	-	-	-	-	-	-	-	-	-	-	-	-	-	-	-	-	-	-	-	-	-	-	-	-	-	-	-	-	-	-	-	-	-
11	113624817	G	T	Sstr2	ENSMUST00000146390.2	c.561G>T	p.Gln187His	missense_variant	1	-	-	-	-	-	-	-	-	-	-	-	-	-	-	-	-	-	-	-	-	-	-	-	-	-	-	-	-	-	-	-	-	-	-	-	-	-	-	-	-
11	113624817	G	T	Slc39a11	ENSMUSG00000041654	n.113624817C>A		intragenic_variant	1	-	-	-	-	-	-	-	-	-	-	-	-	-	-	-	-	-	-	-	-	-	-	-	-	-	-	-	-	-	-	-	-	-	-	-	-	-	-	-	-
11	113903030	T	G	Sdk2	ENSMUST00000041627.13	c.343+4A>C		splice_region_variant&intron_variant	1	-	-	-	-	-	-	-	-	-	-	-	-	-	-	-	-	-	-	-	-	-	-	-	-	-	-	-	-	-	-	-	-	-	-	-	-	-	-	-	-
11	114668779	A	T	Rpl38	ENSMUST00000077915.9	c.-31-2A>T		splice_acceptor_variant&intron_variant	2	-	-	-	-	-	-	0.1963 (21/107)	-	-	-	-	-	-	-	-	-	-	-	-	-	-	-	-	-	-	-	-	-	-	-	-	-	-	-	-	-	-	-	-	-
11	114671707	CA	C	Rpl38	ENSMUST00000077915.9	c.65-26delA		intron_variant	1	-	-	-	-	-	-	-	-	-	-	-	-	-	-	-	-	-	-	-	-	-	-	-	-	-	-	-	-	-	-	-	-	-	-	-	-	-	-	-	-
11	114735832	C	T	Dnaic2	ENSMUST00000069325.13	c.346-33C>T		intron_variant	1	-	-	-	-	-	-	-	-	-	-	-	-	-	-	-	-	-	-	-	-	-	-	-	-	-	-	-	-	-	-	-	-	-	-	-	-	-	-	-	-
11	115159727	C	A	Rab37	ENSMUST00000021076.5	c.418C>A	p.Leu140Ile	missense_variant	1	-	-	-	-	-	-	-	-	-	-	-	-	-	-	-	-	-	-	-	-	-	-	-	-	-	-	-	-	-	-	-	-	-	-	-	-	-	-	-	-
11	115269610	C	CA	Fdxr	ENSMUST00000021078.2	c.1017dupT	p.Gly340fs	frameshift_variant	1	-	-	-	-	-	-	-	-	-	-	-	-	-	-	-	-	-	-	-	-	-	-	-	-	-	-	-	-	-	-	-	-	-	-	-	-	-	-	-	-
11	115591735	A	G	Gga3	ENSMUST00000019135.13	c.319T>C	p.Ser107Pro	missense_variant	1	-	-	-	-	-	-	-	-	-	-	-	-	-	-	-	-	-	-	-	-	-	0.1667 (6/36)	-	-	-	-	-	-	-	-	-	-	-	-	-	-	-	-	-	-
11	115854217	A	T	Llgl2	ENSMUST00000177736.7	c.2828A>T	p.Glu943Val	missense_variant	1	-	-	-	-	-	-	-	-	-	-	-	-	-	-	-	-	-	-	-	-	-	-	-	-	-	-	-	-	-	-	-	-	-	-	-	-	-	-	-	-
11	115957388	T	C	Sap30bp	ENSMUST00000140991.1	c.335T>C	p.Met112Thr	missense_variant	2	-	-	-	-	-	-	-	-	-	-	-	-	-	-	-	-	-	-	-	-	-	-	-	-	-	-	-	-	-	-	-	-	-	-	-	-	-	-	-	-
11	116154004	T	C	Fbf1	ENSMUST00000103031.7	c.983A>G	p.Lys328Arg	missense_variant	1	-	-	-	-	-	-	-	-	-	-	-	-	-	-	-	-	-	-	-	-	-	-	-	-	-	-	-	-	-	-	-	-	-	-	0.1739 (4/23)	-	-	-	-	-
11	116490213	G	C	Prpsap1	ENSMUST00000106391.7	c.5C>G	p.Pro2Arg	missense_variant	1	-	-	-	-	-	-	-	-	-	-	-	-	-	-	-	-	-	-	-	-	-	-	-	-	-	-	-	-	-	-	-	-	-	-	-	-	-	-	-	-
11	116601911	T	G	Rhbdf2	ENSMUST00000103028.7	c.1283A>C	p.Asn428Thr	missense_variant	2	-	-	-	-	-	-	-	-	-	-	-	-	-	-	-	-	-	-	-	-	-	-	-	-	-	-	-	-	-	-	-	-	-	-	-	-	-	-	-	-
11	118050362	C	A	Dnah17	ENSMUST00000106308.9	c.9660G>T	p.Thr3220Thr	synonymous_variant	1	-	-	-	-	-	-	-	-	-	-	-	-	-	-	-	-	-	-	-	-	-	-	-	-	-	-	-	-	-	-	-	-	-	-	-	-	-	-	-	-
11	118261996	A	G	Usp36	ENSMUST00000092382.9	c.*3T>C		3_prime_UTR_variant	1	-	-	-	-	-	-	-	-	-	0.3488 (15/43)	-	-	-	-	-	-	-	-	-	-	-	-	-	-	-	-	-	-	-	-	-	-	-	-	-	-	-	-	-	-
11	118276161	C	T	Usp36	ENSMUST00000092382.9	c.889G>A	p.Glu297Lys	missense_variant	1	-	-	-	0.3056 (11/36)	-	-	-	-	-	-	-	-	-	-	-	-	-	-	-	-	-	-	-	-	-	-	-	-	-	-	-	-	-	-	-	-	-	-	-	-
11	119394036	G	A	Rnf213	ENSMUST00000093902.11	c.97+840G>A		intron_variant	1	-	-	-	-	-	-	-	-	-	-	-	-	-	-	-	-	-	-	-	-	-	-	-	-	-	-	-	-	-	-	-	-	-	-	-	-	-	-	-	-
11	119843734	T	C	Rptor	ENSMUST00000026671.12	c.1562T>C	p.Val521Ala	missense_variant	3	-	-	-	-	-	-	-	-	-	-	-	-	-	-	-	-	-	-	-	-	-	-	-	-	-	-	-	-	-	-	-	-	-	-	-	-	-	-	-	-
11	119897484	G	A	Rptor	ENSMUST00000026671.12	c.*2G>A		3_prime_UTR_variant	2	-	-	-	-	-	-	-	-	-	-	-	-	-	-	-	-	-	-	-	0.1132 (6/53)	-	0.1143 (4/35)	-	-	-	-	-	-	-	-	-	-	-	-	-	-	-	-	-	-
11	120568058	A	T	P4hb	ENSMUST00000026122.10	c.493-3T>A		splice_region_variant&intron_variant	1	-	-	-	-	-	-	-	-	-	-	-	-	-	-	-	-	-	-	-	-	-	-	-	-	-	-	-	-	-	-	-	-	-	-	-	-	-	-	-	-
11	120594810	G	T	Alyref	ENSMUST00000026125.2	c.*43C>A		3_prime_UTR_variant	1	-	-	-	-	-	-	-	-	-	-	-	-	-	-	-	-	-	-	-	-	-	-	-	-	-	-	-	-	-	-	-	-	-	-	-	-	-	-	-	-
11	121238427	T	TA	Narf	ENSMUST00000103015.3	c.42dupA	p.Ser15fs	frameshift_variant	1	-	-	-	-	-	-	-	-	-	-	-	-	-	-	-	0.1081 (4/37)	-	-	-	-	-	-	-	-	-	-	-	-	-	-	-	-	-	-	-	-	-	-	-	-
11	121461811	A	C	Tbcd	ENSMUST00000103013.9	c.638+4A>C		splice_region_variant&intron_variant	1	-	-	-	-	-	-	-	-	-	-	-	-	-	-	-	-	-	-	-	-	-	-	-	-	-	-	-	-	-	-	-	-	-	-	-	-	-	-	-	-
11	121497127	A	G	Tbcd	ENSMUST00000103013.9	c.1083A>G	p.Glu361Glu	synonymous_variant	1	-	-	-	-	-	-	-	-	-	-	-	-	-	-	-	-	-	-	-	-	-	-	-	-	-	-	-	-	-	-	-	-	-	-	-	-	0.1667 (4/24)	-	-	-
11	121945531	C	G	Gm12587-Gm12591	ENSMUSG00000082947-ENSMUSG00000082831	n.121945531C>G		intergenic_region	1	-	-	-	-	-	-	-	-	-	-	-	-	-	-	-	-	-	-	-	-	-	-	-	-	-	-	-	-	-	-	-	-	-	-	-	-	-	-	-	-
12	4233598	G	GT	Cenpo	ENSMUST00000140975.7	c.-23dupA		5_prime_UTR_variant	1	-	-	-	-	-	-	-	-	-	-	-	-	-	-	-	-	-	-	-	-	-	-	-	-	-	-	-	-	-	-	-	-	-	-	-	-	-	-	-	-
12	8977447	A	C	Wdr35	ENSMUST00000085745.12	c.214+13A>C		intron_variant	1	-	-	-	-	-	-	-	-	-	-	-	-	-	-	-	-	-	-	-	-	-	-	-	-	-	-	-	-	-	-	-	-	-	-	-	-	-	-	-	-
12	16989713	G	A	Pqlc3	ENSMUST00000054536.10	c.*91C>T		3_prime_UTR_variant	1	-	-	-	-	-	-	-	-	-	-	0.1333 (4/30)	-	-	-	-	-	-	-	-	-	-	-	-	-	-	-	-	-	-	-	-	-	-	-	-	-	-	-	-	-
12	20416114	C	T	Gm10479	ENSMUST00000101568.3	c.126+51C>T		intron_variant	1	-	-	-	-	-	-	-	-	-	-	-	-	-	-	-	-	-	-	-	-	-	-	-	-	-	-	-	-	-	-	-	-	-	-	-	-	-	-	-	-
12	20815215	C	A	1700030C10Rik	ENSMUST00000189625.1	n.434+131G>T		intron_variant	1	-	-	-	-	-	-	-	-	-	-	-	-	0.4286 (6/14)	-	-	-	-	-	-	-	-	-	-	-	-	-	-	-	-	-	-	-	-	-	-	-	-	-	-	-
12	20815215	C	A	1700030C10Rik	ENSMUST00000110971.2	n.513G>T		non_coding_transcript_exon_variant	1	-	-	-	-	-	-	-	-	-	-	-	-	0.4286 (6/14)	-	-	-	-	-	-	-	-	-	-	-	-	-	-	-	-	-	-	-	-	-	-	-	-	-	-	-
12	28631666	T	G	Rps7	ENSMUST00000074267.3	c.465A>C	p.Lys155Asn	missense_variant	3	-	-	-	-	-	-	-	-	-	-	-	-	-	-	-	-	-	-	-	-	-	-	-	-	-	-	-	-	-	-	-	-	-	-	-	-	-	-	-	-
12	40035993	A	T	Arl4a	ENSMUST00000101472.3	c.*151T>A		3_prime_UTR_variant	2	-	-	-	-	-	-	-	-	-	-	-	-	-	-	-	-	-	-	-	-	-	-	-	-	-	-	-	-	-	-	-	-	-	-	-	-	-	-	-	-
12	40621300	C	T	Dock4	ENSMUST00000037488.6	c.117C>T	p.Cys39Cys	synonymous_variant	1	-	-	-	-	-	-	-	-	-	-	-	-	-	-	-	-	-	-	-	-	-	-	-	-	-	-	-	-	-	-	-	-	-	-	-	-	-	-	-	-
12	44283778	C	T	Pnpla8	ENSMUST00000043082.14	c.1039-15C>T		intron_variant	1	-	-	-	-	-	-	-	-	-	-	-	-	-	-	-	-	-	-	-	-	-	-	-	-	-	-	-	-	-	-	-	-	-	-	-	-	-	-	-	-
12	55061200	A	C	2700097O09Rik	ENSMUST00000021406.5	c.220-7T>G		splice_region_variant&intron_variant	1	-	-	-	-	-	-	-	-	-	-	-	-	-	-	-	-	-	-	-	-	-	-	-	-	-	-	-	-	-	-	-	-	-	-	-	-	-	-	-	-
12	55491241	A	C	Nfkbia	ENSMUST00000021413.7	c.426T>G	p.Phe142Leu	missense_variant	1	-	-	-	-	-	-	-	-	-	-	-	-	-	-	-	-	-	-	-	-	-	-	-	-	-	-	-	-	-	-	-	-	-	-	-	-	-	-	-	-
12	57240232	G	GA	Mipol1	ENSMUSG00000047022	n.57240238dupA		intragenic_variant	1	-	-	-	-	-	-	-	-	-	-	-	-	-	-	-	-	-	-	-	-	-	-	-	-	-	-	-	0.129 (4/31)	-	-	-	-	-	-	-	-	-	-	-	-
12	65158830	A	AT	Mis18bp1	ENSMUST00000052201.8	c.566dupA	p.Asn189fs	frameshift_variant	1	-	-	-	-	-	-	-	-	-	-	-	-	-	-	-	-	-	-	-	-	-	-	-	-	-	-	-	-	-	-	-	-	-	-	-	-	-	-	-	-
12	66486722	T	C	Mdga2	ENSMUST00000037181.14	c.2665A>G	p.Thr889Ala	missense_variant	1	-	-	-	-	-	-	-	-	-	-	-	-	-	-	-	-	-	-	-	-	-	-	-	-	-	-	-	-	-	-	-	-	-	-	-	-	-	-	-	-
12	69722085	T	G	L2hgdh	ENSMUST00000021370.8	c.252A>C	p.Lys84Asn	missense_variant	1	-	-	-	-	-	-	-	-	-	-	-	-	-	-	-	-	-	-	-	-	-	-	-	-	-	-	-	-	-	-	-	-	-	-	-	-	-	-	-	-
12	70049164	T	A	Nin	ENSMUST00000085314.9	c.1636-2A>T		splice_acceptor_variant&intron_variant	1	-	-	-	-	-	-	-	-	-	-	-	-	-	-	-	-	-	-	-	-	-	-	-	-	-	-	-	-	-	-	-	-	-	-	-	-	-	-	-	-
12	71070027	G	A	Arid4a	ENSMUST00000046305.11	c.1858G>A	p.Val620Ile	missense_variant	2	-	-	-	-	-	-	-	-	-	-	-	-	-	-	-	-	-	-	-	-	-	-	-	-	-	-	-	-	-	-	-	-	-	-	-	-	-	-	-	-
12	71075025	G	A	Arid4a	ENSMUST00000046305.11	c.2179G>A	p.Glu727Lys	missense_variant	1	-	-	-	-	-	-	-	-	-	-	-	-	-	-	-	-	-	-	-	-	-	-	-	-	-	-	-	-	-	-	0.1042 (5/48)	-	-	-	-	-	-	-	-	-
12	71075025	G	GA	Arid4a	ENSMUST00000046305.11	c.2186dupA	p.Asn729fs	frameshift_variant	2	-	-	-	-	-	-	-	-	-	-	-	-	-	-	-	-	-	-	-	-	-	-	-	-	-	-	-	-	-	-	-	-	-	-	0.102 (5/49)	-	-	-	-	-
12	71075377	C	T	Arid4a	ENSMUST00000046305.11	c.2531C>T	p.Ser844Phe	missense_variant	1	-	-	-	-	-	-	-	-	0.2364 (26/110)	-	-	-	-	-	-	-	-	-	-	-	-	-	-	-	-	-	-	-	-	-	-	-	-	-	-	-	-	-	-	-
12	72303740	C	T	Rtn1	ENSMUST00000078505.13	c.1694G>A	p.Ser565Asn	missense_variant	2	-	-	-	-	-	-	-	-	-	-	-	-	-	-	-	-	-	-	-	-	-	-	-	-	-	-	-	-	-	-	-	-	-	-	-	-	-	-	-	-
12	73585371	A	T	Prkch	ENSMUST00000021527.14	c.209A>T	p.Glu70Val	missense_variant	1	-	-	-	-	-	-	-	-	-	-	-	-	-	-	-	-	-	-	-	-	-	-	-	-	-	-	-	-	-	-	-	-	-	-	-	-	-	-	-	-
12	74965290	C	A	Kcnh5	ENSMUST00000042299.2	c.1854G>T	p.Trp618Cys	missense_variant	1	-	-	-	-	-	-	-	-	-	-	-	-	-	-	-	-	-	-	-	-	-	-	-	-	-	-	-	-	-	-	-	-	-	-	-	-	-	-	-	-
12	76603471	A	G	Sptb	ENSMUST00000021458.12	c.5471T>C	p.Val1824Ala	missense_variant	1	-	-	-	-	-	-	-	-	-	-	-	-	-	-	-	-	-	-	-	-	-	-	-	-	-	-	-	-	-	-	-	-	-	-	-	-	0.1481 (4/27)	-	-	-
12	82397494	G	A	Sipa1l1	ENSMUST00000053969.6	c.2978G>A	p.Arg993His	missense_variant	2	-	-	-	-	-	-	-	-	-	-	-	-	-	-	-	-	-	-	-	-	-	-	-	-	-	-	-	-	-	-	-	-	-	-	-	-	-	-	-	-
12	85475861	G	A	Fos	ENSMUST00000021674.6	c.546G>A	p.Glu182Glu	synonymous_variant	1	-	-	-	-	0.5274 (173/328)	-	-	-	-	-	-	-	-	-	-	-	-	-	-	-	-	-	-	-	-	-	-	-	-	-	-	-	-	-	-	-	-	-	-	-
12	86138754	TTC	T	Ift43	ENSMUST00000054565.6	c.213-1277_213-1276delTC		intron_variant	1	-	-	-	-	-	-	-	-	-	-	-	-	0.1429 (4/28)	-	-	-	-	-	-	-	-	-	-	-	-	-	-	-	-	-	-	-	-	-	-	-	-	-	-	-
12	86361587	C	T	Esrrb	ENSMUSG00000021255	n.86361587C>T		intragenic_variant	1	-	-	-	-	-	-	-	-	-	-	-	-	-	-	-	-	-	-	-	-	-	-	-	-	-	-	-	-	-	-	-	-	-	-	-	-	-	-	-	-
12	86846062	C	T	Gm25888-Irf2bpl	ENSMUSG00000088403-ENSMUSG00000034168	n.86846062C>T		intergenic_region	2	-	-	-	-	-	-	-	-	-	-	-	-	-	-	-	-	-	-	-	-	-	-	-	-	-	-	-	-	-	0.2857 (4/14)	-	-	-	-	-	-	-	-	-	-
12	87368995	C	T	Sptlc2	ENSMUST00000021424.4	c.257G>A	p.Arg86Gln	missense_variant	2	-	-	-	-	-	-	-	-	-	-	-	-	-	-	-	-	-	-	-	-	-	-	-	-	-	-	-	-	-	-	-	-	-	-	-	-	-	-	-	-
12	91813986	A	C	Sel1l	ENSMUST00000021347.11	c.1880T>G	p.Ile627Ser	missense_variant	1	-	-	-	-	-	-	-	-	-	-	-	-	-	-	-	-	-	-	-	-	-	-	-	-	-	-	-	-	-	-	-	-	-	-	0.2056 (22/107)	-	-	-	-	-
12	95781035	T	TA	Flrt2	ENSMUST00000057324.3	c.*172dupA		3_prime_UTR_variant	1	-	-	-	-	-	-	-	-	-	-	-	-	-	-	-	-	-	0.1282 (5/39)	-	-	-	-	-	-	-	-	-	-	-	-	-	-	-	-	-	-	-	-	-	-
12	99891639	C	T	Tdp1	ENSMUST00000021594.4	c.456C>T	p.Gly152Gly	synonymous_variant	2	-	-	-	-	-	-	-	-	-	-	-	-	-	-	-	-	-	-	-	-	-	-	-	-	-	-	-	-	-	-	-	-	-	-	-	-	-	0.463 (25/54)	-	-
12	100835151	A	G	9030617O03Rik	ENSMUST00000110073.7	c.188-34A>G		intron_variant	1	-	-	-	-	-	-	-	-	-	-	-	-	-	-	-	-	-	-	-	-	-	-	-	-	-	-	-	-	-	-	-	-	-	-	-	-	-	-	-	-
12	102369601	C	T	Rin3	ENSMUST00000056950.13	c.1770C>T	p.Ala590Ala	synonymous_variant	2	-	-	-	-	-	-	-	-	-	-	-	-	-	-	-	-	-	-	-	-	-	-	-	-	-	-	-	-	-	-	-	-	-	-	-	-	-	-	-	-
12	102742959	T	TA	Moap1	ENSMUST00000173760.8	c.329dupT	p.Leu110fs	frameshift_variant	1	-	-	-	-	-	-	-	-	-	-	-	-	-	-	-	0.1143 (4/35)	-	-	-	-	-	-	-	-	-	-	-	-	-	-	-	-	-	-	-	-	-	-	-	-
12	102742959	T	TA	Gm20604	ENSMUST00000174651.1	c.*412dupT		3_prime_UTR_variant	1	-	-	-	-	-	-	-	-	-	-	-	-	-	-	-	0.1143 (4/35)	-	-	-	-	-	-	-	-	-	-	-	-	-	-	-	-	-	-	-	-	-	-	-	-
12	102742959	T	TA	Gm28051	ENSMUST00000179306.1	c.205+14581dupT		intron_variant	1	-	-	-	-	-	-	-	-	-	-	-	-	-	-	-	0.1143 (4/35)	-	-	-	-	-	-	-	-	-	-	-	-	-	-	-	-	-	-	-	-	-	-	-	-
12	103141978	G	T	Unc79	ENSMUST00000179002.7	c.6371-1G>T		splice_acceptor_variant&intron_variant	1	-	-	-	-	-	-	-	-	-	-	-	-	-	-	-	-	-	-	-	-	-	-	0.2381 (15/63)	-	-	-	-	-	-	-	-	-	-	-	-	-	-	-	-	-
12	103424279	G	C	Ddx24	ENSMUST00000110001.2	c.452C>G	p.Ala151Gly	missense_variant	1	-	-	-	-	-	-	-	-	-	-	-	-	-	-	-	-	-	-	-	-	-	-	-	-	-	-	-	-	-	-	-	-	-	-	-	-	0.2381 (15/63)	-	-	-
12	104116541	A	T	Serpina3a	ENSMUST00000021496.7	c.572A>T	p.Lys191Met	missense_variant	2	-	-	-	-	-	-	-	-	-	-	-	-	-	-	-	-	-	-	-	-	-	-	-	-	-	-	-	-	-	-	-	-	-	-	-	-	-	-	-	-
12	104119733	C	T	Serpina3a	ENSMUST00000021496.7	c.1016C>T	p.Thr339Ile	missense_variant	1	-	-	-	-	-	-	-	-	-	-	-	-	-	-	-	-	-	-	-	-	-	-	-	-	-	-	-	-	-	-	-	-	-	-	-	-	-	-	-	-
12	104119734	A	G	Serpina3a	ENSMUST00000021496.7	c.1017A>G	p.Thr339Thr	synonymous_variant	1	-	-	-	-	-	-	-	-	-	-	-	-	-	-	-	-	-	-	-	-	-	-	-	-	-	-	-	-	-	-	-	-	-	-	-	-	-	-	-	-
12	104134171	A	C	Serpina3b	ENSMUST00000085052.2	c.1011A>C	p.Thr337Thr	synonymous_variant	1	-	-	-	-	-	-	-	-	-	-	-	-	-	-	1.0 (12/12)	-	-	-	-	-	-	-	-	-	-	-	-	-	-	-	-	-	-	-	-	-	-	-	-	-
12	104266527	A	C	Serpina3i	ENSMUST00000109958.2	c.690A>C	p.Pro230Pro	synonymous_variant	1	-	-	-	-	-	-	-	-	-	-	-	-	-	-	-	-	-	-	-	-	-	-	-	-	-	-	-	-	-	-	-	-	-	-	-	-	-	-	-	-
12	104345295	G	A	Serpina3k	ENSMUST00000043058.4	c.1131G>A	p.Gly377Gly	synonymous_variant	1	-	-	-	-	-	-	-	-	-	-	-	-	-	-	-	-	-	-	-	-	-	-	-	-	-	-	-	-	-	-	-	-	-	-	1.0 (20/20)	-	-	-	-	-
12	104345295	G	A	Serpina3m	ENSMUST00000101078.11	c.-13+6750G>A		intron_variant	1	-	-	-	-	-	-	-	-	-	-	-	-	-	-	-	-	-	-	-	-	-	-	-	-	-	-	-	-	-	-	-	-	-	-	1.0 (20/20)	-	-	-	-	-
12	104703022	C	T	Dicer1	ENSMUST00000041987.6	c.3400G>A	p.Glu1134Lys	missense_variant	1	-	-	-	-	-	-	-	-	-	-	-	-	-	-	-	-	-	-	-	-	-	-	-	-	-	-	-	-	-	-	-	-	-	-	-	-	-	-	-	-
12	104704194	C	A	Dicer1	ENSMUST00000041987.6	c.3111G>T	p.Leu1037Leu	synonymous_variant	1	-	-	-	-	-	-	-	-	-	-	0.8718 (34/39)	-	-	-	-	-	-	-	-	-	-	-	-	-	-	-	-	-	-	-	-	-	-	-	-	-	-	-	-	-
12	105658160	TA	T	Atg2b	ENSMUST00000041055.7	c.1972-6delT		splice_region_variant&intron_variant	1	-	-	-	-	-	-	-	-	-	-	-	-	-	-	-	-	-	-	-	-	-	-	-	-	-	-	-	-	0.1818 (4/22)	-	-	-	-	-	-	-	-	-	-	-
12	108107671	T	G	Setd3	ENSMUST00000071095.13	c.1346A>C	p.Lys449Thr	missense_variant	1	-	-	-	-	-	-	-	-	-	0.2407 (26/108)	-	-	-	-	-	-	-	-	-	-	-	-	-	-	-	-	-	-	-	-	-	-	-	-	-	-	-	-	-	-
12	110659483	G	C	Dync1h1	ENSMUST00000018851.13	c.11902G>C	p.Val3968Leu	missense_variant	1	-	-	-	-	-	-	-	-	-	-	-	-	-	-	-	-	-	-	-	-	-	-	-	-	-	-	-	-	-	-	-	-	-	-	-	-	-	-	-	-
12	110977247	C	A	Ankrd9	ENSMUST00000142012.1	c.352G>T	p.Ala118Ser	missense_variant	1	-	-	-	-	-	-	-	-	-	-	-	-	-	-	-	-	-	-	-	-	-	-	-	-	-	-	-	0.1667 (4/24)	-	-	-	-	-	-	-	-	-	-	-	-
12	110977565	G	A	Ankrd9	ENSMUST00000142012.1	c.51-17C>T		intron_variant	1	-	-	-	-	-	-	-	-	-	-	-	-	-	-	-	-	-	-	-	-	-	-	-	-	-	-	-	-	-	-	-	-	-	-	-	-	-	-	-	-
12	111448325	C	T	Tnfaip2	ENSMUST00000109792.7	c.1165C>T	p.Leu389Leu	synonymous_variant	2	-	-	-	-	-	-	-	-	-	0.8 (92/115)	-	-	-	-	-	-	-	-	-	-	-	-	-	-	-	-	-	-	-	-	-	-	-	-	0.7518 (106/141)	-	-	-	-	-
12	111670888	T	A	Ckb	ENSMUST00000001304.7	c.638A>T	p.Asp213Val	missense_variant	1	-	-	-	-	-	-	-	-	-	-	-	-	-	-	-	-	-	-	-	-	-	-	-	-	-	-	-	-	-	-	-	-	-	-	-	-	-	-	-	-
12	112600315	G	T	Inf2	ENSMUST00000101029.2	c.313G>T	p.Val105Leu	missense_variant	2	-	-	-	-	-	-	-	-	-	-	-	-	-	-	-	-	-	-	-	-	-	-	-	-	-	-	-	-	-	-	-	-	-	-	-	-	-	-	-	-
12	112603795	A	G	Inf2	ENSMUST00000101029.2	c.927A>G	p.Gln309Gln	synonymous_variant	1	-	-	-	-	-	-	-	-	-	-	-	-	-	-	-	-	-	-	-	-	-	-	-	-	-	0.1064 (5/47)	-	-	-	-	-	-	-	-	-	-	-	-	-	-
12	112679808	C	CAT	Zbtb42	ENSMUST00000169593.1	c.417_418insTA	p.His140fs	frameshift_variant	1	-	-	-	-	-	-	-	-	-	-	-	-	-	-	-	-	-	-	-	-	-	-	-	-	-	-	-	-	-	-	-	-	-	-	-	-	-	-	-	-
12	112744940	T	G	Cep170b	ENSMUST00000101018.9	c.*28T>G		3_prime_UTR_variant	2	-	-	-	-	-	-	-	-	-	-	-	-	-	-	-	-	-	-	-	-	-	-	-	-	-	-	-	-	-	-	-	-	-	-	-	-	-	-	-	-
12	113762248	G	T	Gm38203-Ighv5-12-4	ENSMUSG00000103446-ENSMUSG00000103033	n.113762248G>T		intergenic_region	1	-	-	-	-	-	-	-	-	-	-	-	-	-	-	-	-	-	-	-	-	-	-	-	-	-	-	-	-	-	-	-	-	-	-	-	-	-	-	-	-
12	113827149	C	T	Ighv5-15-Ighv5-16	ENSMUSG00000094134-ENSMUSG00000094194	n.113827149C>T		intergenic_region	1	-	-	-	-	-	-	-	-	-	-	-	-	-	-	-	-	-	-	-	-	-	-	-	-	-	-	-	-	-	-	-	-	-	-	0.64 (16/25)	-	-	-	-	-
12	114153677	A	C	Ighv7-3-Ighv15-1	ENSMUSG00000076652-ENSMUSG00000103121	n.114153677A>C		intergenic_region	1	-	-	-	-	-	-	-	-	-	-	-	-	-	-	-	-	-	-	-	-	-	-	-	-	-	-	-	-	-	-	-	-	-	-	0.1667 (5/30)	-	-	-	-	-
12	114288587	T	G	Ighv3-6-Ighv9-4	ENSMUSG00000076672-ENSMUSG00000094322	n.114288587T>G		intergenic_region	1	-	-	-	-	-	-	-	-	-	-	-	-	-	-	-	-	-	-	-	-	-	-	-	-	-	-	-	-	-	-	-	-	-	-	-	-	-	-	-	-
12	114746710	T	G	Ighv1-22-Ighv1-23	ENSMUSG00000094561-ENSMUSG00000103290	n.114746710T>G		intergenic_region	2	-	-	-	-	-	-	-	-	-	-	-	-	-	-	-	-	-	-	-	-	-	-	-	-	-	-	-	-	-	-	-	-	-	-	-	-	-	-	-	-
12	114788814	T	C	Ighv1-26-Ighv1-27	ENSMUSG00000094546-ENSMUSG00000103395	n.114788814T>C		intergenic_region	1	-	-	-	-	-	-	-	-	-	-	-	-	-	-	-	-	-	-	-	-	-	-	-	-	-	-	-	-	-	-	-	-	-	-	-	-	-	-	-	-
12	115158848	T	C	Ighv1-53-Ighv8-6	ENSMUSG00000093894-ENSMUSG00000094505	n.115158848T>C		intergenic_region	1	-	-	-	-	-	-	-	-	-	-	-	-	-	-	-	-	-	-	-	-	-	-	-	-	-	-	-	-	-	-	-	-	-	-	-	-	-	-	-	-
12	115158853	T	C	Ighv1-53-Ighv8-6	ENSMUSG00000093894-ENSMUSG00000094505	n.115158853T>C		intergenic_region	1	-	-	-	-	-	-	-	-	-	-	-	-	-	-	-	-	-	-	-	-	-	-	-	-	-	-	-	-	-	-	-	-	-	-	-	-	-	-	-	-
12	115604398	G	C	Ighv1-67-Ighv1-68	ENSMUSG00000095863-ENSMUSG00000105582	n.115604398G>C		intergenic_region	1	-	-	-	-	-	-	-	-	-	-	-	-	-	-	-	-	-	-	-	-	-	-	-	-	-	-	-	-	-	-	-	-	-	-	0.6842 (13/19)	-	-	-	-	-
12	115623624	A	C	Ighv1-69-Ighv8-12	ENSMUSG00000094502-ENSMUSG00000076731	n.115623624A>C		intergenic_region	1	-	-	-	-	-	-	-	-	-	-	-	-	-	-	-	-	-	-	-	-	-	-	-	-	-	-	-	-	-	-	-	-	-	-	-	-	-	-	-	-
12	117952485	C	T	Dnah11	ENSMUST00000084806.6	c.10607+5G>A		splice_region_variant&intron_variant	1	-	-	-	-	-	-	-	-	-	-	-	-	-	-	-	-	-	-	-	-	-	-	-	-	-	-	-	-	-	-	-	-	-	-	-	-	-	-	-	-
13	6581463	T	C	Pfkp	ENSMUST00000021614.13	c.2352A>G	p.Leu784Leu	synonymous_variant	1	-	-	-	-	-	-	-	-	-	-	-	-	-	-	-	-	-	-	-	-	-	-	-	-	-	-	-	-	-	-	-	-	-	-	-	-	-	-	-	-
13	8979470	A	G	Gtpbp4	ENSMUST00000021574.6	c.1202T>C	p.Leu401Pro	missense_variant	2	-	-	-	-	-	-	-	-	-	0.4934 (75/152)	-	-	-	-	-	-	-	-	-	-	-	-	-	-	-	-	-	-	-	-	-	-	-	-	0.3548 (55/155)	-	-	-	-	-
13	13190737	A	G	Prl2c5	ENSMUST00000126540.7	c.476A>G	p.Gln159Arg	missense_variant	2	-	-	-	-	-	-	-	-	-	-	-	-	-	-	-	0.7143 (10/14)	-	-	-	-	-	-	-	-	-	-	-	-	-	-	-	-	-	-	-	-	-	-	-	-
13	17721239	C	A	Cdk13	ENSMUST00000042365.7	c.3084G>T	p.Gln1028His	missense_variant	1	-	-	-	-	-	-	-	-	-	-	-	-	-	-	-	-	-	-	-	-	-	-	-	-	-	-	-	-	-	-	-	-	-	-	-	-	-	-	-	-
13	19623795	G	C	Sfrp4	ENSMUST00000002883.5	c.363G>C	p.Glu121Asp	missense_variant	1	-	-	-	-	-	-	-	-	-	-	-	-	-	-	-	-	-	-	-	-	-	-	-	-	-	-	-	-	-	-	-	-	-	-	-	-	-	-	-	-
13	21445117	A	G	Zscan26	ENSMUST00000110485.1	c.1215T>C	p.Thr405Thr	synonymous_variant	1	-	-	-	-	-	-	-	-	-	-	-	-	-	-	-	-	-	-	-	-	-	-	-	-	-	-	-	-	-	-	-	-	-	-	-	-	-	-	-	-
13	21445117	A	G	4930470G03Rik	ENSMUST00000122926.1	n.1630A>G		non_coding_transcript_exon_variant	1	-	-	-	-	-	-	-	-	-	-	-	-	-	-	-	-	-	-	-	-	-	-	-	-	-	-	-	-	-	-	-	-	-	-	-	-	-	-	-	-
13	21537614	G	A	Olfr1366	ENSMUST00000168629.1	c.345C>T	p.Leu115Leu	synonymous_variant	1	-	-	-	-	-	-	-	-	-	-	-	-	-	-	-	-	-	-	-	-	-	-	-	-	-	-	-	-	-	-	-	-	-	-	-	-	-	-	-	-
13	21537614	G	A	Olfr1366	ENSMUST00000205976.1	c.390C>T	p.Leu130Leu	synonymous_variant	1	-	-	-	-	-	-	-	-	-	-	-	-	-	-	-	-	-	-	-	-	-	-	-	-	-	-	-	-	-	-	-	-	-	-	-	-	-	-	-	-
13	22293350	CTTTGACAAATATTACATTGCTT	C	Vmn1r196	ENSMUST00000091735.1	c.162_183delGACAAATATTACATTGCTTTTT	p.Leu54fs	frameshift_variant	1	-	-	-	-	-	-	-	-	-	-	-	-	-	-	-	-	-	-	-	-	-	-	-	-	-	-	-	-	-	-	-	-	-	-	-	-	-	-	-	-
13	22294037	T	C	Vmn1r196	ENSMUST00000091735.1	c.845T>C	p.Leu282Pro	missense_variant	1	-	-	-	-	-	-	-	-	-	-	-	-	-	-	-	-	-	-	-	-	-	-	-	-	-	-	-	-	-	-	-	-	-	-	-	-	-	-	-	-
13	22328684	C	T	Vmn1r197	ENSMUST00000091734.1	c.774C>T	p.Ser258Ser	synonymous_variant	1	-	-	-	-	-	-	-	-	-	-	-	-	-	-	-	-	-	-	-	-	-	-	-	-	-	-	-	-	-	-	-	-	-	-	-	-	-	-	-	-
13	23535915	C	CA	Hist1h3g-Hist1h2bh	ENSMUSG00000099517-ENSMUSG00000064168	n.23535915_23535916insA		intergenic_region	1	-	-	-	-	-	-	-	-	-	-	-	-	-	-	-	-	-	-	-	-	-	-	-	-	-	-	-	-	-	-	-	-	-	-	-	-	-	-	-	-
13	23544553	C	T	Hist1h3f	ENSMUST00000075558.3	c.69C>T	p.Thr23Thr	synonymous_variant	1	-	-	-	-	-	-	-	-	-	-	-	-	-	-	-	-	-	-	-	-	-	-	-	-	-	-	-	-	-	-	-	-	-	-	-	-	-	-	-	-
13	23739291	A	G	Hist1h1c	ENSMUST00000040914.2	c.443A>G	p.Lys148Arg	missense_variant	2	-	-	-	-	-	-	-	-	-	-	-	-	-	-	-	-	-	-	-	-	-	-	-	-	-	-	-	-	-	-	-	-	-	-	-	-	-	-	-	-
13	23740334	A	C	Hist1h1c	ENSMUST00000040914.2	c.*847A>C		3_prime_UTR_variant	1	-	-	-	-	-	-	-	-	-	-	-	-	-	-	-	-	-	-	-	-	-	-	-	-	-	-	-	-	-	-	-	-	-	-	-	-	-	-	-	-
13	24713723	C	G	Fam65b	ENSMUST00000110384.8	c.2403C>G	p.Asp801Glu	missense_variant	1	-	-	-	0.1404 (25/178)	-	-	-	-	-	-	-	-	-	-	-	-	-	-	-	-	-	-	-	-	-	-	-	-	-	-	-	-	-	-	-	-	-	-	-	-
13	24899840	A	C	D130043K22Rik	ENSMUST00000006893.8	c.*41A>C		3_prime_UTR_variant	1	-	-	-	-	-	-	-	-	-	-	-	-	-	-	-	-	-	-	-	-	-	-	-	-	-	-	-	-	-	-	-	-	-	-	-	-	-	-	-	-
13	27437039	T	G	Prl8a6	ENSMUST00000110355.8	c.207A>C	p.Glu69Asp	missense_variant	1	-	-	-	-	-	-	-	-	-	-	-	-	-	-	-	-	-	-	-	-	-	-	-	-	-	-	-	-	-	-	-	-	-	-	-	-	-	-	-	-
13	27716658	A	G	Prl7d1	ENSMUST00000021776.2	c.12T>C	p.Ser4Ser	synonymous_variant	1	-	-	-	-	-	-	-	0.1953 (50/256)	-	-	-	-	-	-	-	-	-	-	-	-	-	-	-	-	-	-	-	-	-	-	-	-	-	-	-	-	-	-	-	-
13	30871922	TA	T	Exoc2	ENSMUST00000021785.6	c.1933-22delT		intron_variant	1	-	-	-	-	-	-	-	-	-	-	-	-	-	-	-	-	-	-	-	-	-	-	-	-	-	-	-	-	-	-	-	-	-	-	-	-	-	-	-	-
13	38196685	C	T	Dsp	ENSMUST00000124830.1	c.7405C>T	p.Gln2469*	stop_gained	1	-	-	-	-	-	-	-	-	-	-	-	-	-	-	-	-	-	-	-	-	-	-	-	-	-	-	-	-	-	-	-	-	-	-	-	-	-	-	-	-
13	38346271	G	GA	Bmp6	ENSMUST00000171970.1	c.339_340insA	p.Gln114fs	frameshift_variant	1	-	-	-	-	-	-	-	-	-	-	-	-	-	-	-	-	-	-	-	-	-	-	-	-	-	-	-	-	-	-	-	-	-	-	-	-	-	-	-	-
13	40206731	A	T	Ofcc1	ENSMUST00000054635.7	c.821T>A	p.Leu274Gln	missense_variant	1	-	-	-	-	-	-	-	-	-	-	-	-	-	-	-	-	-	-	-	-	-	-	-	-	-	-	-	-	-	-	-	-	-	-	-	-	-	-	-	-
13	41172742	T	G	Sycp2l-Elovl2	ENSMUSG00000038651-ENSMUSG00000021364	n.41172742T>G		intergenic_region	1	-	-	-	-	-	-	-	-	-	-	-	-	-	-	-	-	-	-	-	-	-	-	-	-	-	-	-	-	-	-	-	-	-	-	-	-	-	-	-	-
13	44910440	G	GA	Jarid2	ENSMUST00000044608.13	c.2637dupA	p.Ser880fs	frameshift_variant	1	-	-	-	-	-	-	-	-	-	-	-	-	-	-	-	-	-	-	-	-	-	-	-	-	-	-	-	-	-	-	-	-	-	-	-	-	-	-	-	-
13	48820014	A	C	Phf2	ENSMUST00000035540.7	c.1147+27T>G		intron_variant	1	-	-	-	-	-	-	-	-	-	-	-	-	-	-	-	-	-	-	-	-	-	-	-	-	-	-	-	-	-	-	-	-	-	-	-	-	-	-	-	-
13	49052769	G	T	Wnk2	ENSMUST00000091623.9	c.5548C>A	p.Leu1850Met	missense_variant	1	-	-	-	0.3846 (10/26)	-	-	-	-	-	-	-	-	-	-	-	-	-	-	-	-	-	-	-	-	-	-	-	-	-	-	-	-	-	-	-	-	-	-	-	-
13	49660995	T	TA	Nol8	ENSMUST00000021824.7	c.584dupA	p.Ile196fs	frameshift_variant	1	-	-	-	-	-	-	-	-	-	-	-	-	-	-	-	-	-	-	-	0.1143 (4/35)	-	-	-	-	-	-	-	-	-	-	-	-	-	-	-	-	-	-	-	-
13	49665376	T	G	Nol8	ENSMUST00000021824.7	c.2596-3T>G		splice_region_variant&intron_variant	1	-	-	-	-	-	-	-	-	-	-	-	-	-	-	-	-	-	-	-	-	-	-	-	-	-	-	-	-	-	-	-	-	-	-	-	-	-	-	-	-
13	54053561	G	A	Drd1	ENSMUST00000021932.5	c.633C>T	p.Ile211Ile	synonymous_variant	1	-	-	-	-	-	-	-	-	-	-	-	-	-	-	-	-	-	-	-	-	-	-	-	-	-	-	-	-	-	-	-	-	-	-	-	-	-	-	-	-
13	54575834	A	T	Arl10	ENSMUST00000026988.10	c.268A>T	p.Ser90Cys	missense_variant	2	-	-	-	-	-	-	-	-	-	-	-	-	-	-	-	-	-	-	-	-	-	-	-	-	-	-	-	-	-	-	-	-	-	-	-	-	-	-	-	-
13	55474922	C	G	Dbn1	ENSMUST00000021950.14	c.1885G>C	p.Glu629Gln	missense_variant	1	-	-	-	-	-	-	-	-	-	-	-	-	-	-	-	-	-	-	-	-	-	-	-	-	-	-	-	-	-	-	-	-	-	-	0.1278 (34/266)	-	-	-	-	-
13	58409552	C	T	Rmi1	ENSMUST00000042450.8	c.1614C>T	p.Asp538Asp	synonymous_variant	1	-	-	-	-	-	-	-	-	-	-	-	-	-	-	-	-	-	-	-	-	-	-	-	-	-	-	-	-	-	-	-	-	-	-	-	-	-	-	-	-
13	61201724	C	A	Cts6	ENSMUST00000021890.4	c.249+5G>T		splice_region_variant&intron_variant	1	-	-	-	-	-	-	-	-	-	-	-	-	-	-	-	-	-	-	-	-	-	-	-	-	-	-	-	-	-	-	-	-	-	-	-	-	-	0.2283 (21/92)	-	-
13	62517411	T	A	Gm22256-Zfp934	ENSMUSG00000076246-ENSMUSG00000074865	n.62517411T>A		intergenic_region	1	-	-	-	-	-	-	-	-	-	-	-	-	-	-	-	-	-	-	-	-	-	-	-	-	-	-	-	-	-	-	-	-	-	-	-	-	-	-	-	-
13	63872604	G	GA	Ercc6l2	ENSMUSG00000021470	n.63872610dupA		intragenic_variant	1	-	-	-	-	-	-	-	-	-	-	-	-	-	-	-	-	-	-	-	-	-	-	-	-	-	-	-	-	-	-	-	-	-	-	-	-	-	-	-	-
13	67491151	A	AT	Zfp58	ENSMUST00000076123.11	c.1219dupA	p.Ile407fs	frameshift_variant	1	-	-	-	-	-	-	-	-	-	-	-	-	-	-	-	-	-	-	-	-	-	-	-	-	-	-	-	-	-	-	-	-	-	-	-	-	0.25 (4/16)	-	-	-
13	67491151	A	AT	Gm26965	ENSMUST00000167914.1	c.*1190dupA		splice_region_variant&3_prime_UTR_variant	1	-	-	-	-	-	-	-	-	-	-	-	-	-	-	-	-	-	-	-	-	-	-	-	-	-	-	-	-	-	-	-	-	-	-	-	-	0.25 (4/16)	-	-	-
13	67491291	A	G	Zfp58	ENSMUST00000076123.11	c.1080T>C	p.Cys360Cys	synonymous_variant	1	-	-	-	-	-	-	-	-	-	-	-	-	-	-	-	-	-	-	-	-	-	-	-	-	-	-	-	-	-	-	-	-	-	-	-	-	-	-	-	-
13	67491291	A	G	Gm26965	ENSMUST00000167914.1	c.*1051T>C		3_prime_UTR_variant	1	-	-	-	-	-	-	-	-	-	-	-	-	-	-	-	-	-	-	-	-	-	-	-	-	-	-	-	-	-	-	-	-	-	-	-	-	-	-	-	-
13	67683409	G	A	Zfp738	ENSMUST00000137496.8	c.30C>T	p.Ile10Ile	synonymous_variant	1	-	-	-	-	-	-	-	-	-	-	-	-	-	-	-	-	-	-	-	-	-	-	-	-	-	-	-	-	-	-	-	-	-	-	-	-	-	-	-	-
13	68587866	G	A	Fastkd3	ENSMUST00000051784.8	c.1702+32G>A		intron_variant	1	-	-	-	-	-	-	-	-	-	-	-	-	-	-	-	-	-	-	-	-	-	-	-	-	-	-	-	-	-	-	-	-	-	-	-	-	-	-	-	-
13	70768565	C	T	Adamts16	ENSMUST00000080145.12	c.2272+35G>A		intron_variant	1	-	-	-	-	-	-	-	-	-	-	-	-	-	-	-	-	-	-	-	-	-	-	-	-	-	-	-	-	-	-	-	-	-	-	-	-	-	-	-	-
13	71960057	T	C	Irx1	ENSMUST00000077337.8	c.505A>G	p.Met169Val	missense_variant	2	-	-	-	-	-	-	-	-	-	-	-	-	-	-	-	-	-	-	-	-	-	-	-	-	-	-	-	-	-	-	-	-	-	-	-	-	-	-	-	-
13	73327355	T	G	Ndufs6	ENSMUST00000022097.5	c.162+61A>C		intron_variant	1	-	-	-	-	-	-	-	-	-	-	-	-	-	-	-	-	-	-	-	-	-	-	-	-	-	-	-	-	-	-	-	-	-	-	-	-	-	-	-	-
13	73327426	C	T	Ndufs6	ENSMUST00000022097.5	c.152G>A	p.Arg51His	missense_variant	1	-	-	-	-	-	-	-	-	-	0.1324 (38/287)	-	-	-	-	-	-	-	-	-	-	-	-	-	-	-	-	-	-	-	-	-	-	-	-	-	-	-	-	-	-
13	83739904	G	GA	C130071C03Rik	ENSMUST00000131907.8	n.2193dupA		non_coding_transcript_exon_variant	2	-	-	-	-	-	-	-	-	-	-	-	-	-	-	-	-	-	-	-	-	-	-	-	-	-	-	-	-	-	-	-	-	-	-	-	-	-	-	-	-
13	83740644	G	GA	C130071C03Rik	ENSMUST00000131907.8	n.2934dupA		non_coding_transcript_exon_variant	1	-	-	-	-	-	-	-	-	-	-	-	-	-	-	-	-	-	-	-	-	-	-	-	-	-	-	-	-	-	-	-	-	-	-	-	-	0.2 (4/20)	-	-	-
13	84284112	G	GA	Tmem161b	ENSMUST00000057495.8	c.793dupA	p.Ile265fs	frameshift_variant	1	-	-	-	-	-	-	-	-	-	0.1379 (4/29)	-	-	-	-	-	-	-	-	-	-	-	-	-	-	-	-	-	-	-	-	-	-	-	-	-	-	-	-	-	-
13	89689787	T	A	Vcan	ENSMUST00000109546.8	c.7637A>T	p.Asp2546Val	missense_variant	1	-	-	-	-	-	-	-	-	-	-	-	-	-	-	-	-	-	-	-	-	-	-	-	-	-	-	-	-	-	-	-	-	-	-	-	-	-	-	-	-
13	92773153	T	A	Thbs4	ENSMUST00000022213.7	c.1131+4A>T		splice_region_variant&intron_variant	1	-	-	-	-	-	-	-	-	-	-	-	-	-	-	-	-	-	-	-	-	-	-	-	-	-	-	-	-	-	-	-	-	-	-	-	-	-	-	-	-
13	93624947	A	G	Bhmt	ENSMUST00000099309.4	c.492T>C	p.Val164Val	synonymous_variant	1	0.3077 (16/52)	-	-	-	-	-	-	-	-	-	-	-	-	-	-	-	-	-	-	-	-	-	-	-	-	-	-	-	-	-	-	-	-	-	-	-	-	-	-	-
13	94483324	C	T	Ap3b1	ENSMUST00000022196.3	c.2394C>T	p.Gly798Gly	synonymous_variant	1	-	-	-	-	-	-	-	-	-	-	-	-	-	-	-	-	-	-	-	-	-	-	-	-	-	-	-	-	-	-	-	-	-	-	-	-	-	-	-	-
13	94877216	C	A	Otp	ENSMUST00000022195.11	c.141C>A	p.Pro47Pro	synonymous_variant	1	-	-	-	-	-	-	-	-	-	-	-	-	-	-	-	-	-	-	-	-	-	-	-	-	-	-	-	-	-	-	-	-	-	-	-	-	-	-	-	-
13	96949753	G	GA	Gcnt4	ENSMUST00000171324.1	c.*2198dupA		3_prime_UTR_variant	9	-	-	-	-	-	-	-	-	-	-	-	-	-	-	-	0.1935 (6/31)	-	0.3077 (4/13)	-	-	-	-	-	-	-	-	-	-	-	-	-	-	-	-	-	-	0.3571 (5/14)	-	-	-
13	96949753	GA	G	Gcnt4	ENSMUST00000171324.1	c.*2198delA		3_prime_UTR_variant	1	-	-	-	-	-	-	-	-	-	-	-	-	-	-	-	-	-	-	-	-	-	-	-	-	-	-	-	-	-	-	-	-	-	-	-	-	-	-	-	-
13	98029402	G	C	Arhgef28	ENSMUST00000109426.1	c.999C>G	p.His333Gln	missense_variant	2	-	-	-	-	-	-	-	-	-	-	-	-	-	0.1064 (5/47)	-	-	-	-	-	-	-	-	-	-	-	-	-	-	-	-	-	-	-	-	-	-	-	-	-	-
13	98763745	T	C	Fcho2	ENSMUST00000040340.14	c.859A>G	p.Arg287Gly	missense_variant	1	-	-	-	-	-	-	-	-	-	-	-	-	-	-	-	-	-	-	-	-	-	-	-	-	-	-	-	-	-	-	-	-	-	-	-	-	0.125 (4/32)	-	-	-
13	100023627	A	G	Bdp1	ENSMUST00000109379.8	c.7245T>C	p.Ala2415Ala	synonymous_variant	1	-	-	-	-	-	-	-	-	-	-	-	-	-	-	-	-	-	-	-	-	-	-	-	-	-	-	-	-	-	-	-	-	-	-	-	-	-	-	-	-
13	100161220	G	T	Naip2	ENSMUST00000067975.11	c.2307C>A	p.Thr769Thr	synonymous_variant	1	-	-	-	-	-	-	-	-	-	-	-	-	-	-	-	-	-	-	-	-	-	-	-	-	-	-	-	-	-	-	-	-	-	-	-	-	-	-	-	-
13	100161685	G	GT	Naip2	ENSMUST00000067975.11	c.1841dupA	p.Asn614fs	frameshift_variant	2	-	-	-	-	-	-	-	-	-	-	-	-	-	-	-	0.1944 (7/36)	-	-	-	0.2105 (4/19)	-	-	-	-	-	-	-	-	-	-	-	-	-	-	-	-	-	-	-	-
13	100217046	A	C	Naip5	ENSMUST00000049789.2	c.3682+22T>G		intron_variant	1	-	-	-	-	-	-	-	-	-	-	-	-	-	-	-	-	-	-	-	-	-	-	-	-	-	-	-	-	-	-	-	-	-	-	-	-	-	0.9412 (32/34)	-	-
13	100282139	G	GA	Naip6	ENSMUST00000042220.2	c.*1409dupT		3_prime_UTR_variant	1	-	-	-	-	-	-	-	-	-	-	-	-	-	-	-	-	-	-	-	-	-	-	-	-	-	-	-	-	-	-	-	-	-	-	-	-	-	-	-	-
13	100288127	G	T	Naip6	ENSMUST00000042220.2	c.3656C>A	p.Ala1219Glu	missense_variant	1	-	-	-	-	-	-	-	-	-	-	-	-	-	-	-	-	-	-	-	-	-	-	-	-	-	-	-	-	-	-	-	-	-	-	-	0.1364 (9/66)	-	-	-	-
13	100666021	T	A	Ak6	ENSMUSG00000078941	n.100666021T>A		intragenic_variant	1	-	-	-	-	-	-	-	-	-	-	-	-	-	-	-	-	-	-	-	-	-	-	-	-	-	-	-	-	-	-	-	-	-	-	-	-	-	-	-	-
13	101688707	C	A	Pik3r1	ENSMUST00000055518.12	c.1351G>T	p.Glu451*	stop_gained	2	-	-	-	-	-	-	-	-	-	-	-	-	-	-	-	-	-	-	-	-	-	-	-	-	-	-	-	-	-	-	-	-	-	-	-	-	-	-	-	-
13	105054022	G	GA	Rgs7bp	ENSMUST00000063551.5	c.165+27dupT		intron_variant	1	-	-	-	-	-	-	-	-	-	-	-	-	-	-	-	-	-	-	-	-	-	-	-	-	-	-	-	-	-	-	-	-	-	-	-	-	-	-	-	-
13	105054022	GA	G	Rgs7bp	ENSMUST00000063551.5	c.165+27delT		intron_variant	1	-	-	-	-	-	-	-	-	-	-	-	-	-	-	-	-	-	-	-	-	-	-	-	-	-	-	-	-	-	-	-	-	-	-	-	-	-	-	-	-
13	105250396	G	C	Rnf180	ENSMUST00000069686.6	c.406C>G	p.Leu136Val	missense_variant	1	-	-	-	-	-	-	-	-	-	-	-	-	-	-	-	-	-	-	-	-	-	0.3571 (5/14)	-	-	-	-	-	-	-	-	-	-	-	-	-	-	-	-	-	-
13	113064259	C	A	Cdc20b	ENSMUST00000109244.8	c.512C>A	p.Ser171*	stop_gained	1	-	-	-	-	-	-	-	-	-	-	-	-	-	-	-	-	-	-	-	-	-	-	-	-	-	-	-	-	-	-	-	-	-	-	-	-	-	-	-	-
13	113617707	C	G	Snx18	ENSMUST00000109241.3	c.689G>C	p.Gly230Ala	missense_variant	3	-	-	-	-	-	-	-	-	-	-	-	-	-	-	-	-	-	-	-	-	-	-	-	-	-	-	-	-	-	-	-	-	-	-	-	-	-	-	-	-
13	116308483	A	G	Isl1	ENSMUST00000036060.12	c.29-20T>C		intron_variant	1	-	-	-	-	-	-	-	-	-	-	-	-	-	-	-	-	-	-	-	-	-	-	-	0.2353 (16/68)	-	-	-	-	-	-	-	-	-	-	-	-	-	-	-	-
14	4219701	A	C	Gm11105-Gm3138	ENSMUSG00000094072-ENSMUSG00000091114	n.4219701A>C		intergenic_region	1	-	-	-	-	-	-	-	-	-	-	-	-	-	-	-	-	-	-	-	-	-	-	-	-	-	-	-	-	-	-	-	-	-	-	-	-	-	-	-	-
14	7896167	G	GT	Flnb	ENSMUST00000052678.8	c.2564dupT	p.Leu855fs	frameshift_variant	1	-	-	-	-	-	-	-	-	-	-	-	-	-	-	-	-	-	-	-	-	-	-	-	-	-	-	-	-	-	-	-	-	-	-	-	-	0.1538 (4/26)	-	-	-
14	7905755	T	C	Flnb	ENSMUST00000052678.8	c.3504T>C	p.Leu1168Leu	synonymous_variant	1	-	-	-	-	-	-	-	-	-	-	-	-	-	-	-	-	-	-	-	-	-	-	-	-	-	-	-	-	-	-	-	-	-	-	-	-	-	-	-	-
14	11962664	A	G	Ptprg	ENSMUST00000022264.12	c.461A>G	p.His154Arg	missense_variant	1	-	-	-	-	0.1141 (21/184)	-	-	-	-	-	-	-	-	-	-	-	-	-	-	-	-	-	-	-	-	-	-	-	-	-	-	-	-	-	-	-	-	-	-	-
14	14861622	G	T	Nek10	ENSMUST00000112630.8	c.1677G>T	p.Lys559Asn	missense_variant	1	-	-	-	-	-	-	-	-	-	-	-	-	-	-	-	-	-	-	-	-	-	-	-	-	-	-	-	-	-	-	-	-	-	-	-	-	-	-	-	-
14	18269905	A	T	Rpl15	ENSMUST00000079419.10	c.309+2T>A		splice_donor_variant&intron_variant	1	-	-	-	-	-	-	-	-	-	-	-	-	-	-	-	-	-	-	-	-	-	-	-	-	-	-	-	-	-	-	-	-	-	-	-	-	-	-	-	-
14	20391280	A	C	Mrps16	ENSMUST00000061444.3	c.*47T>G		3_prime_UTR_variant	1	-	-	-	-	-	-	-	-	-	-	-	-	-	-	-	-	0.1692 (11/65)	-	-	-	-	-	-	-	-	-	-	-	-	-	-	-	-	-	-	-	-	-	-	-
14	20509447	C	T	Ppp3cb	ENSMUST00000159027.7	c.1240G>A	p.Gly414Ser	missense_variant	2	-	-	-	-	-	-	-	-	-	-	-	-	-	-	-	-	-	-	-	-	-	-	-	-	-	-	-	-	-	-	-	-	-	-	-	0.5246 (32/61)	-	-	-	-
14	24457074	C	A	Polr3a	ENSMUST00000026322.7	c.3014G>T	p.Arg1005Leu	missense_variant	1	-	-	-	-	-	-	-	-	-	-	-	-	-	-	-	-	-	-	-	-	-	-	-	-	-	-	-	-	-	-	-	-	-	-	-	-	-	-	-	-
14	24493425	A	G	Rps24	ENSMUST00000169826.1	c.322A>G	p.Lys108Glu	missense_variant	2	-	-	-	-	-	-	-	-	-	-	-	-	-	-	-	-	-	-	-	-	-	-	-	-	-	-	-	-	-	-	-	-	-	-	-	-	-	-	-	-
14	26377741	A	C	4933413J09Rik	ENSMUST00000059648.9	n.444+1383A>C		intron_variant	1	-	-	-	-	-	-	-	-	-	-	-	-	-	-	-	-	-	-	-	-	-	-	-	-	-	-	-	-	-	-	-	-	-	-	-	-	-	-	-	-
14	30817772	A	C	Sfmbt1	ENSMUST00000054230.10	c.2516A>C	p.Lys839Thr	missense_variant	1	-	-	-	-	-	-	-	-	-	0.3 (6/20)	-	-	-	-	-	-	-	-	-	-	-	-	-	-	-	-	-	-	-	-	-	-	-	-	-	-	-	-	-	-
14	31174408	C	G	Nisch	ENSMUST00000022469.12	c.3571G>C	p.Val1191Leu	missense_variant	1	-	-	-	-	-	-	-	-	-	-	0.4354 (118/271)	-	-	-	-	-	-	-	-	-	-	-	-	-	-	-	-	-	-	-	-	-	-	-	-	-	-	-	-	-
14	31271072	T	C	Dnah1	ENSMUST00000048603.7	c.8864A>G	p.Lys2955Arg	missense_variant	1	-	-	-	-	-	-	-	-	-	-	-	-	-	-	-	-	-	-	-	-	-	-	-	-	-	-	-	-	-	-	-	-	-	-	-	-	-	-	-	-
14	32175975	T	C	Ncoa4	ENSMUST00000111994.9	c.751T>C	p.Trp251Arg	missense_variant	1	-	-	-	-	-	-	-	-	-	-	-	-	-	-	-	-	-	-	-	-	-	-	-	-	-	-	-	-	-	-	-	-	-	-	-	-	-	-	-	-
14	32274901	C	G	Parg	ENSMUST00000022470.14	c.2463C>G	p.His821Gln	missense_variant	1	-	-	-	-	-	-	-	-	-	-	-	-	-	-	-	-	-	-	-	-	-	-	-	-	-	-	-	-	-	-	-	-	-	-	-	-	-	-	-	-
14	34695105	G	A	Wapl	ENSMUST00000048263.13	c.1671G>A	p.Arg557Arg	splice_region_variant&synonymous_variant	1	-	-	-	-	-	-	-	-	-	-	-	-	-	-	-	-	-	-	-	-	-	-	-	-	-	-	-	-	-	-	-	-	-	-	-	-	-	-	-	-
14	43715037	C	G	Gm17208	ENSMUST00000168388.2	n.350-357C>G		intron_variant	1	-	-	-	-	-	-	-	-	-	-	-	-	-	-	-	-	-	-	-	-	-	-	-	-	-	-	-	-	-	-	-	-	-	-	-	-	-	-	-	-
14	43715037	C	G	Gm7324	ENSMUST00000094051.4	n.1136C>G		non_coding_transcript_exon_variant	1	-	-	-	-	-	-	-	-	-	-	-	-	-	-	-	-	-	-	-	-	-	-	-	-	-	-	-	-	-	-	-	-	-	-	-	-	-	-	-	-
14	45213456	G	T	Txndc16	ENSMUST00000123879.7	c.-8C>A		5_prime_UTR_variant	1	-	-	-	-	-	-	-	-	-	-	-	-	-	-	-	-	-	-	-	-	-	-	-	-	-	-	-	-	-	-	-	-	-	-	-	-	-	-	-	-
14	45306541	G	A	Ero1l	ENSMUST00000022378.7	c.205C>T	p.Leu69Phe	missense_variant	2	-	-	-	-	-	-	-	-	-	-	-	-	-	-	-	-	-	-	-	-	-	-	-	-	-	-	-	-	-	-	-	-	-	-	-	-	-	-	-	-
14	45616638	TA	T	Ddhd1	ENSMUST00000087320.11	c.1344-3delT		splice_region_variant&intron_variant	1	-	-	-	-	-	-	-	-	-	-	-	-	-	-	-	-	-	-	-	-	-	-	-	-	-	-	-	-	-	-	-	-	-	-	-	-	-	-	-	-
14	47395967	A	AT	Dlgap5	ENSMUST00000043296.9	c.1600dupA	p.Ile534fs	frameshift_variant	2	-	-	-	-	-	-	-	-	-	-	-	-	-	-	-	-	-	-	-	-	-	-	-	-	-	-	-	-	-	-	-	-	-	-	-	-	0.1296 (7/54)	-	-	-
14	47395967	A	ATT	Dlgap5	ENSMUST00000043296.9	c.1599_1600dupAA	p.Ile534fs	frameshift_variant	1	-	-	-	-	-	-	-	-	-	-	-	-	-	-	-	-	-	-	-	-	-	-	-	-	-	-	-	-	-	-	-	-	-	-	-	-	-	-	-	-
14	49172818	T	A	Naa30	ENSMUST00000037362.5	c.202T>A	p.Ser68Thr	missense_variant	1	-	-	-	-	-	-	-	-	-	-	-	-	-	-	-	-	-	-	-	-	-	-	-	-	-	-	-	-	-	-	-	-	-	-	-	-	-	-	-	-
14	50841293	G	A	Tep1	ENSMUST00000006444.7	c.4502C>T	p.Ser1501Phe	missense_variant	1	-	-	-	-	-	-	-	-	-	-	-	-	-	-	-	-	-	-	-	-	-	-	-	-	-	-	-	-	-	-	-	-	-	-	-	-	-	-	-	-
14	51711921	G	C	Gm5800	ENSMUST00000095916.2	c.*5C>G		3_prime_UTR_variant	1	-	-	-	-	-	-	-	-	-	-	-	-	-	-	-	-	-	-	-	-	-	-	-	-	-	-	-	-	-	-	-	-	-	-	-	-	-	-	-	-
14	51800113	T	C	AY358078	ENSMUST00000053821.4	c.68T>C	p.Leu23Pro	missense_variant&splice_region_variant	1	-	-	-	-	-	-	-	-	-	-	-	-	-	-	-	-	-	-	-	-	-	-	-	-	-	-	-	-	-	-	-	-	-	-	-	-	-	-	-	-
14	51994373	C	T	Arhgef40	ENSMUST00000182760.7	c.2242C>T	p.Arg748Cys	missense_variant	1	-	-	-	-	-	-	-	-	-	-	-	-	-	-	-	-	-	-	-	-	-	-	-	-	-	-	-	-	-	-	-	-	-	-	-	-	-	-	-	-
14	52205802	C	T	Chd8	ENSMUST00000089752.10	c.5399G>A	p.Trp1800*	stop_gained&splice_region_variant	1	-	-	-	-	-	-	-	-	-	-	-	-	-	-	-	-	-	-	-	-	-	-	-	-	-	-	-	-	-	-	-	-	-	-	-	-	-	-	-	-
14	52205802	C	T	Gm26590	ENSMUST00000180857.1	n.287+43C>T		intron_variant	1	-	-	-	-	-	-	-	-	-	-	-	-	-	-	-	-	-	-	-	-	-	-	-	-	-	-	-	-	-	-	-	-	-	-	-	-	-	-	-	-
14	53461339	G	A	Trav7-4	ENSMUST00000181728.2	c.49+82G>A		intron_variant	1	-	-	-	-	-	-	-	-	-	-	-	-	-	-	-	-	-	-	-	-	-	-	-	-	-	-	-	-	-	-	-	-	-	-	-	-	-	-	-	-
14	53704018	T	C	Trav5-4	ENSMUST00000103664.5	c.12T>C	p.Tyr4Tyr	synonymous_variant	1	-	-	-	-	-	-	-	-	-	-	-	-	-	-	-	-	-	-	-	-	-	-	-	-	-	-	-	-	-	-	-	-	-	-	-	-	-	-	-	-
14	54372950	C	T	Slc7a7	ENSMUST00000000984.8	c.1238G>A	p.Arg413His	missense_variant	1	-	-	-	-	-	-	-	-	-	0.4464 (50/112)	-	-	-	-	-	-	-	-	-	-	-	-	-	-	-	-	-	-	-	-	-	-	-	-	-	-	-	-	-	-
14	54664795	G	A	Acin1	ENSMUST00000022793.14	c.1539C>T	p.Cys513Cys	synonymous_variant	1	-	-	-	-	-	-	-	-	-	-	-	-	-	-	-	-	-	-	-	-	-	-	-	-	-	-	-	-	-	-	-	-	-	-	-	-	-	-	-	-
14	54907102	G	A	Slc22a17	ENSMUST00000050772.7	c.1175C>T	p.Pro392Leu	missense_variant	1	-	-	-	-	-	-	-	-	-	-	-	-	-	-	-	-	-	-	-	-	-	-	-	-	-	-	-	-	-	-	-	-	-	-	-	-	-	-	-	-
14	55065583	G	A	Zfhx2	ENSMUST00000036328.8	c.4943C>T	p.Ala1648Val	missense_variant	1	-	-	-	-	-	-	-	-	-	-	-	-	-	-	-	-	-	-	-	-	0.4375 (7/16)	-	-	-	-	-	-	-	-	-	-	-	-	-	-	-	-	-	-	-
14	55065583	G	A	Gm20687	ENSMUST00000176872.2	n.714-6279G>A		intron_variant	1	-	-	-	-	-	-	-	-	-	-	-	-	-	-	-	-	-	-	-	-	0.4375 (7/16)	-	-	-	-	-	-	-	-	-	-	-	-	-	-	-	-	-	-	-
14	55065583	G	A	Thtpa	ENSMUSG00000045691	n.55065583G>A		intragenic_variant	1	-	-	-	-	-	-	-	-	-	-	-	-	-	-	-	-	-	-	-	-	0.4375 (7/16)	-	-	-	-	-	-	-	-	-	-	-	-	-	-	-	-	-	-	-
14	55493693	C	T	Lrrc16b	ENSMUST00000076236.5	c.362+54C>T		intron_variant	1	-	-	-	-	-	-	-	-	-	-	-	-	-	-	-	-	-	-	-	-	-	-	-	-	-	-	-	-	-	-	-	-	-	-	-	-	-	-	-	-
14	55618851	T	G	Rec8	ENSMUST00000002395.7	c.125+41T>G		intron_variant	1	-	-	-	-	-	-	-	-	0.6727 (37/55)	-	-	-	-	-	-	-	-	-	-	-	-	-	-	-	-	-	-	-	-	-	-	-	-	-	-	-	-	-	-	-
14	55758360	C	CT	Cideb	ENSMUST00000001497.7	c.-69dupA		5_prime_UTR_variant	1	-	-	-	-	-	-	-	-	-	-	-	-	-	-	-	-	-	-	-	-	-	-	-	-	-	-	-	-	-	-	-	-	0.3077 (4/13)	-	-	-	-	-	-	-
14	56100731	G	GT	Ctsg	ENSMUST00000015583.1	c.405dupA	p.Leu136fs	frameshift_variant	1	-	-	-	-	-	-	-	-	-	-	-	-	-	-	-	-	-	-	-	0.1077 (14/130)	-	-	-	-	-	-	-	-	-	-	-	-	-	-	-	-	-	-	-	-
14	56260710	T	C	Gzmb	ENSMUST00000015581.4	c.208A>G	p.Ile70Val	missense_variant	1	-	-	-	-	-	-	-	-	-	-	-	-	-	-	-	-	-	-	-	-	-	-	-	-	-	-	-	-	-	-	-	-	-	-	-	-	-	-	-	-
14	59586383	G	A	Cdadc1	ENSMUST00000167100.7	c.659C>T	p.Ala220Val	missense_variant	2	-	-	-	-	-	-	-	-	-	-	-	-	-	-	-	-	-	-	-	-	-	-	-	-	-	-	-	-	-	-	-	-	-	-	-	-	-	-	-	-
14	61556558	C	T	Spryd7	ENSMUST00000022497.14	c.69G>A	p.Lys23Lys	synonymous_variant	1	-	-	-	-	-	-	-	-	-	-	-	-	-	-	-	-	-	-	-	-	-	-	-	-	-	0.1846 (12/65)	-	-	-	-	-	-	-	-	-	-	-	-	-	-
14	65059000	A	T	Extl3	ENSMUST00000022550.7	c.2406T>A	p.Ala802Ala	synonymous_variant	4	-	-	-	-	-	-	-	-	-	-	-	-	-	-	-	-	-	-	-	-	-	-	-	-	-	-	-	-	-	-	-	-	-	-	-	-	-	-	-	-
14	67765931	T	TA	Dock5	ENSMUST00000039135.4	c.4713dupT	p.Thr1572fs	frameshift_variant	1	-	-	-	-	-	-	-	-	-	-	-	-	-	-	-	-	-	-	-	-	-	-	-	-	-	-	-	-	-	-	-	-	-	-	-	-	-	-	-	-
14	68570190	C	CT	Adamdec1	ENSMUST00000022641.7	c.1019dupA	p.Asn341fs	frameshift_variant	1	-	-	-	-	-	-	-	-	-	-	-	-	-	-	-	-	-	-	-	-	-	-	-	-	-	-	-	-	-	-	-	-	-	-	-	-	-	-	-	-
14	68628996	A	G	Adam28	ENSMUST00000022642.5	c.1380+33T>C		intron_variant	1	0.2927 (12/41)	-	-	-	-	-	-	-	-	-	-	-	-	-	-	-	-	-	-	-	-	-	-	-	-	-	-	-	-	-	-	-	-	-	-	-	-	-	-	-
14	70533173	C	A	Lgi3	ENSMUST00000047331.6	c.351-4C>A		splice_region_variant&intron_variant	1	-	-	-	-	-	-	-	-	-	-	-	-	-	-	-	-	-	-	-	-	-	-	-	-	-	-	-	-	-	-	-	-	-	-	-	-	-	-	-	-
14	75897635	A	C	Gtf2f2	ENSMUST00000088922.4	c.649T>G	p.Leu217Val	missense_variant	2	-	-	-	-	-	-	-	-	-	-	-	-	-	-	-	-	-	-	-	-	-	-	-	-	-	-	-	-	-	-	-	-	-	-	-	-	-	-	-	-
14	76236977	A	G	Rps2-ps6	ENSMUST00000095471.4	c.377T>C	p.Val126Ala	missense_variant	1	-	-	-	-	-	-	-	-	-	-	-	-	-	-	-	-	-	-	-	-	-	-	-	-	-	-	-	-	-	-	-	-	-	-	-	-	-	-	-	-
14	76416916	T	G	Tsc22d1	ENSMUST00000048371.14	c.834T>G	p.Pro278Pro	synonymous_variant	2	-	-	-	-	-	-	-	-	-	-	-	-	-	-	-	-	-	-	-	-	-	-	-	-	-	-	-	-	-	-	-	-	-	-	-	-	-	-	-	-
14	79427828	C	A	Kbtbd7	ENSMUST00000061222.7	c.1099C>A	p.Leu367Ile	missense_variant	1	-	-	-	-	-	-	-	-	-	-	-	-	-	-	-	-	-	-	-	-	-	-	-	-	-	-	-	-	-	-	-	-	-	-	-	-	-	-	-	-
14	87485711	G	A	Tdrd3	ENSMUST00000168275.7	c.858+12G>A		intron_variant	1	-	-	-	-	-	-	-	-	-	-	-	-	-	-	-	-	-	-	-	-	-	-	-	-	-	-	-	-	-	-	-	-	-	-	-	-	-	-	-	-
14	101640368	C	G	Commd6	ENSMUST00000100339.8	c.48+21G>C		intron_variant	1	-	-	-	-	-	-	-	-	-	-	-	-	-	-	-	-	-	-	-	-	-	-	-	-	-	-	-	-	-	-	-	-	-	-	-	-	-	-	-	-
14	101933986	TA	T	Lmo7	ENSMUST00000100337.9	c.*79delA		3_prime_UTR_variant	2	-	-	-	-	-	-	-	-	-	-	-	-	-	-	-	-	-	-	-	-	-	-	-	-	-	-	-	-	-	-	-	-	-	-	-	-	-	-	-	-
14	103055144	A	G	Acod1	ENSMUST00000022722.6	c.1103A>G	p.Lys368Arg	missense_variant	1	-	-	-	-	-	-	-	-	-	-	-	-	-	-	-	-	-	-	-	-	-	-	-	-	-	-	-	-	-	-	-	-	-	-	-	-	-	-	-	-
14	117870322	A	T	Gpc6	ENSMUST00000125435.1	c.878-31A>T		intron_variant	1	-	-	0.1321 (7/53)	-	-	-	-	-	-	-	-	-	-	-	-	-	-	-	-	-	-	-	-	-	-	-	-	-	-	-	-	-	-	-	-	-	-	-	-	-
14	118235923	C	CT	Sox21	ENSMUST00000170662.1	c.-289dupA		5_prime_UTR_variant	2	-	-	-	-	-	-	-	-	-	-	-	-	-	-	-	-	-	-	-	-	-	-	-	-	-	-	-	-	-	-	-	-	-	-	-	-	-	-	-	-
14	120935087	T	C	Ipo5	ENSMUST00000032898.7	c.1556T>C	p.Val519Ala	missense_variant	2	-	-	-	-	-	-	-	-	-	-	-	-	-	-	-	-	-	0.2368 (27/114)	-	-	-	-	-	-	-	-	0.257 (46/179)	-	-	-	-	-	-	-	-	-	-	-	-	-
14	122123744	T	A	Tm9sf2	ENSMUST00000026624.10	c.197T>A	p.Leu66His	missense_variant	1	-	-	-	-	-	-	-	-	-	-	0.2471 (21/85)	-	-	-	-	-	-	-	-	-	-	-	-	-	-	-	-	-	-	-	-	-	-	-	-	-	-	-	-	-
14	122155337	T	G	Tm9sf2	ENSMUST00000026624.10	c.1759T>G	p.Trp587Gly	missense_variant	2	-	-	-	-	-	-	-	-	-	0.6809 (160/235)	-	-	-	-	-	-	-	-	-	-	-	-	-	-	-	-	-	-	-	-	-	-	-	-	0.3562 (130/365)	-	-	-	-	-
15	4091238	G	C	Oxct1	ENSMUST00000110690.8	c.803G>C	p.Arg268Pro	missense_variant	2	-	-	-	-	-	-	-	-	-	-	-	-	-	-	-	-	-	-	-	-	-	-	-	-	-	-	-	-	-	-	-	-	-	-	-	-	-	-	-	-
15	4516683	A	C	Plcxd3	ENSMUST00000061925.4	c.168A>C	p.Glu56Asp	missense_variant	1	-	-	-	-	-	-	-	-	-	-	-	0.125 (10/80)	-	-	-	-	-	-	-	-	-	-	-	-	-	-	-	-	-	-	-	-	-	-	-	-	-	-	-	-
15	5176504	A	T	Prkaa1	ENSMUST00000051186.8	c.840A>T	p.Lys280Asn	missense_variant	1	-	-	-	-	-	-	-	-	-	-	-	-	-	-	-	-	-	-	-	-	-	-	-	-	-	-	-	-	-	-	-	-	-	-	-	-	-	-	-	-
15	5176504	A	T	Gm15938	ENSMUST00000150079.1	n.314-1098T>A		intron_variant	1	-	-	-	-	-	-	-	-	-	-	-	-	-	-	-	-	-	-	-	-	-	-	-	-	-	-	-	-	-	-	-	-	-	-	-	-	-	-	-	-
15	6579956	G	A	Fyb	ENSMUST00000090461.11	c.9G>A	p.Lys3Lys	synonymous_variant	1	-	-	-	-	-	-	-	-	-	-	-	-	-	-	-	-	-	0.2647 (9/34)	-	-	-	-	-	-	-	-	-	-	-	-	-	-	-	-	-	-	-	-	-	-
15	7164566	T	G	Lifr	ENSMUST00000067190.11	c.420T>G	p.Ser140Ser	synonymous_variant	2	-	-	-	-	-	-	-	-	-	-	-	-	-	-	-	-	-	-	-	-	-	-	-	-	-	-	-	-	-	-	-	-	-	-	-	-	-	-	-	-
15	8035816	T	C	Wdr70	ENSMUST00000045766.6	c.764A>G	p.Gln255Arg	missense_variant	1	-	-	-	-	-	-	-	-	-	-	-	-	-	-	-	-	-	-	-	-	-	-	-	-	-	-	-	-	-	-	-	-	-	-	-	-	-	-	-	-
15	8202292	C	CA	2410089E03Rik	ENSMUST00000110617.1	c.3230dupA	p.Asn1077fs	frameshift_variant	1	-	-	-	-	-	-	-	-	-	-	-	-	-	-	-	-	-	-	-	-	-	-	-	-	-	-	-	-	-	-	-	-	-	-	-	-	-	-	-	-
15	8359179	G	A	Nipbl	ENSMUST00000052965.6	c.956C>T	p.Pro319Leu	missense_variant	1	-	-	-	-	-	-	-	-	-	-	-	-	-	-	-	-	-	-	-	-	-	-	-	-	-	-	-	-	-	-	-	-	-	-	-	-	-	-	-	-
15	9723657	T	A	Spef2	ENSMUST00000208854.1	c.557A>T	p.Asp186Val	missense_variant&splice_region_variant	1	-	-	-	-	-	-	-	-	-	-	-	-	-	-	-	-	-	-	-	-	-	-	-	-	-	-	-	-	-	-	-	-	-	-	-	-	-	-	-	-
15	11217796	A	G	Adamts12	ENSMUST00000061318.7	c.844-6A>G		splice_region_variant&intron_variant	1	-	-	-	-	-	-	-	-	-	-	-	-	-	-	-	-	-	-	-	-	-	-	-	-	-	-	-	-	-	-	-	-	-	-	-	-	-	-	-	-
15	21558369	C	A	Cdh12	ENSMUST00000075132.6	c.1353C>A	p.Asn451Lys	missense_variant	1	-	-	-	-	-	-	-	-	-	-	-	-	-	-	-	-	-	-	-	-	-	-	-	-	-	-	-	-	-	-	-	-	-	-	-	-	-	0.2388 (32/134)	-	-
15	22714743	G	C	Cdh18	ENSMUSG00000040420	n.22714743G>C		intragenic_variant	1	-	-	-	-	-	-	-	0.1805 (37/205)	-	-	-	-	-	-	-	-	-	-	-	-	-	-	-	-	-	-	-	-	-	-	-	-	-	-	-	-	-	-	-	-
15	22714743	G	C	Gm5803	ENSMUST00000022493.6	n.88C>G		non_coding_transcript_exon_variant	1	-	-	-	-	-	-	-	0.1805 (37/205)	-	-	-	-	-	-	-	-	-	-	-	-	-	-	-	-	-	-	-	-	-	-	-	-	-	-	-	-	-	-	-	-
15	31598002	T	C	Cct5	ENSMUST00000022842.14	c.164A>G	p.Asn55Ser	missense_variant&splice_region_variant	1	-	-	-	-	-	-	-	-	-	-	-	-	-	-	-	-	-	-	-	-	-	-	-	-	-	-	0.1106 (133/1203)	-	-	-	-	-	-	-	-	-	-	-	-	-
15	31601689	G	A	Cct5	ENSMUST00000022842.14	c.17C>T	p.Thr6Ile	missense_variant	1	-	-	-	-	-	-	-	-	-	-	-	-	-	-	-	-	-	-	-	-	-	-	-	-	-	-	-	-	-	-	-	-	-	-	-	-	-	-	-	-
15	34114899	G	C	Mtdh	ENSMUST00000022865.15	c.666G>C	p.Gly222Gly	synonymous_variant	1	-	-	-	-	-	-	-	-	-	-	-	-	-	-	-	-	-	-	-	-	-	-	-	-	-	-	-	0.3175 (67/211)	-	-	-	-	-	-	-	-	-	-	-	-
15	34650463	A	T	Nipal2	ENSMUST00000040791.7	c.136-13T>A		intron_variant	1	-	-	-	-	-	-	-	-	-	-	-	-	-	-	-	-	-	-	-	-	-	-	-	-	-	-	-	-	-	-	-	-	-	-	-	-	-	-	-	-
15	35597465	C	G	Vps13b	ENSMUST00000048646.7	c.3150C>G	p.Asp1050Glu	missense_variant	1	-	-	-	-	-	-	-	-	-	-	-	-	-	-	-	-	-	-	-	-	-	-	-	-	-	-	-	-	-	-	-	0.2632 (15/57)	-	-	-	-	-	-	-	-
15	35937167	G	C	Cox6c	ENSMUST00000014457.14	c.105C>G	p.Ala35Ala	synonymous_variant	2	-	-	-	-	-	-	-	-	-	-	-	-	-	-	-	-	-	-	-	-	-	-	-	-	-	-	-	-	-	-	-	-	-	-	-	0.3443 (21/61)	-	-	-	-
15	37944543	C	CT	Rrm2b	ENSMUST00000022901.15	c.504dupA	p.Ala169fs	frameshift_variant	1	-	-	-	-	-	-	-	-	-	-	-	-	-	-	-	-	-	-	-	-	-	-	-	-	-	-	-	-	-	-	-	-	-	-	0.1064 (5/47)	-	-	-	-	-
15	39030941	T	A	Fzd6	ENSMUST00000022906.7	c.501T>A	p.Thr167Thr	synonymous_variant	1	-	-	-	-	-	-	-	-	-	-	-	-	-	-	-	-	-	-	-	-	-	-	-	-	-	-	-	-	-	-	-	-	-	-	-	-	-	-	-	-
15	47607137	T	A	Csmd3	ENSMUST00000100670.9	c.10142A>T	p.Lys3381Met	missense_variant	1	-	-	-	-	-	-	-	-	-	-	-	-	-	-	-	-	-	-	-	-	-	-	-	-	-	-	-	-	-	-	-	-	-	-	-	-	-	-	-	-
15	53344798	T	G	Ext1	ENSMUST00000077273.8	c.566A>C	p.Asn189Thr	missense_variant	2	-	-	-	-	-	-	-	-	-	-	-	-	-	-	-	-	-	-	0.4308 (56/130)	-	-	-	-	-	-	-	-	-	-	-	-	-	-	-	-	-	-	-	-	-
15	53345460	G	C	Ext1	ENSMUST00000077273.8	c.-97C>G		5_prime_UTR_variant	1	-	-	-	-	-	-	-	-	-	-	-	-	-	-	-	0.2402 (92/383)	-	-	-	-	-	-	-	-	-	-	-	-	-	-	-	-	-	-	-	-	-	-	-	-
15	55089138	AG	A	Dscc1	ENSMUST00000110231.1	c.201-16delC		intron_variant	1	-	-	-	-	-	-	-	-	-	-	-	-	-	-	-	-	-	-	-	-	-	-	-	-	-	-	-	-	-	-	-	-	-	-	-	-	-	-	-	-
15	58022400	T	G	9130401M01Rik	ENSMUST00000100655.4	c.1085A>C	p.Asn362Thr	missense_variant	1	-	-	-	-	-	-	-	-	-	-	-	-	-	-	-	-	-	-	-	-	-	-	-	-	-	-	-	-	-	-	-	-	-	-	-	-	-	-	-	-
15	58122456	T	G	Atad2	ENSMUST00000038194.3	c.868A>C	p.Ser290Arg	missense_variant	1	-	-	-	-	-	-	-	-	-	0.2683 (33/123)	-	-	-	-	-	-	-	-	-	-	-	-	-	-	-	-	-	-	-	-	-	-	-	-	-	-	-	-	-	-
15	63864119	G	T	Gsdmc3	ENSMUST00000089894.5	c.631C>A	p.Leu211Ile	missense_variant	1	-	-	-	-	-	-	-	-	-	-	-	-	0.2462 (16/65)	-	-	-	-	-	-	-	-	-	-	-	-	-	-	-	-	-	-	-	-	-	-	-	-	-	-	-
15	63894638	AAC	A	Gsdmc4	ENSMUST00000063530.6	c.820+33_820+34delGT		intron_variant	1	-	-	-	-	-	-	-	-	-	-	-	-	-	-	-	-	-	-	-	-	-	-	-	-	-	-	-	-	-	-	-	-	-	-	-	-	-	-	-	-
15	66380543	C	A	Lrrc6	ENSMUST00000023006.6	c.1273G>T	p.Asp425Tyr	missense_variant	1	-	-	-	-	-	-	-	-	-	-	-	-	-	-	-	-	-	-	-	-	-	-	-	-	-	-	-	-	-	-	-	-	-	-	-	-	-	-	-	-
15	66758020	CAG	C	Tg	ENSMUST00000065916.13	c.6391+32_6391+33delAG		intron_variant	1	-	-	-	-	-	-	-	-	-	-	-	-	0.2222 (4/18)	-	-	-	-	-	-	-	-	-	-	-	-	-	-	-	-	-	-	-	-	-	-	-	-	-	-	-
15	66912991	G	T	Wisp1	ENSMUST00000005255.8	c.512G>T	p.Arg171Leu	missense_variant	1	-	-	-	-	-	-	-	-	-	-	-	-	-	-	-	-	-	-	-	-	-	-	-	-	-	-	-	-	-	-	-	-	-	-	-	-	-	-	-	-
15	71445964	AC	A	Fam135b	ENSMUST00000022953.8	c.4147delG	p.Val1383fs	frameshift_variant	1	-	-	-	-	-	-	-	-	-	-	-	-	-	-	-	-	-	-	-	-	-	-	-	-	-	-	-	-	-	-	-	-	-	-	-	-	-	-	-	-
15	73105475	C	T	Ago2	ENSMUST00000044113.10	c.*1433G>A		3_prime_UTR_variant	1	-	-	-	-	-	-	-	-	-	-	-	-	-	-	-	-	-	-	-	-	-	-	-	-	-	-	-	-	-	-	-	-	-	-	-	-	-	-	-	-
15	73264245	C	T	Ptk2	ENSMUST00000110036.8	c.1603G>A	p.Ala535Thr	missense_variant	2	-	-	-	-	-	-	-	-	-	-	-	-	-	-	-	-	-	-	-	-	-	-	-	-	-	-	-	-	-	-	-	-	-	-	-	-	-	-	-	-
15	74733088	T	A	Lypd2	ENSMUST00000023260.4	c.59-2A>T		splice_acceptor_variant&intron_variant	1	-	-	-	-	-	-	-	-	-	-	-	-	-	-	-	-	-	-	-	-	-	-	-	-	-	-	-	-	-	-	-	-	-	-	-	-	-	-	-	-
15	74762798	G	T	Ly6d	ENSMUST00000040404.7	c.104C>A	p.Pro35His	missense_variant	1	-	-	-	-	-	-	-	-	-	-	-	-	-	-	-	-	-	-	-	-	-	-	-	-	-	-	-	-	-	-	-	-	-	-	-	-	-	-	-	-
15	74836227	G	A	Cyp11b1	ENSMUST00000170259.2	c.1392+6C>T		splice_region_variant&intron_variant	1	-	-	-	-	-	-	-	-	-	-	-	-	0.3056 (11/36)	-	-	-	-	-	-	-	-	-	-	-	-	-	-	-	-	-	-	-	-	-	-	-	-	-	-	-
15	74995481	T	C	Ly6a	ENSMUST00000023248.12	c.188-2A>G		splice_acceptor_variant&intron_variant	1	-	-	-	-	-	-	-	-	-	-	-	-	-	-	-	-	-	-	-	-	-	-	-	-	-	-	-	-	-	-	-	-	-	-	0.3846 (5/13)	-	-	-	-	-
15	74995482	G	A	Ly6a	ENSMUST00000023248.12	c.188-3C>T		splice_region_variant&intron_variant	1	-	-	-	-	-	-	-	-	-	-	-	-	-	-	-	-	-	-	-	-	-	-	-	-	-	-	-	-	-	-	-	-	-	-	0.3846 (5/13)	-	-	-	-	-
15	75663367	G	A	Top1mt	ENSMUST00000000958.8	c.1521C>T	p.Ser507Ser	synonymous_variant	1	-	-	-	-	-	-	-	-	-	-	-	-	-	-	-	-	-	-	-	-	-	-	-	-	-	-	-	-	-	-	-	0.3774 (20/53)	-	-	-	-	-	-	-	-
15	75663367	G	A	Gm15945	ENSMUST00000146755.1	n.648G>A		non_coding_transcript_exon_variant	1	-	-	-	-	-	-	-	-	-	-	-	-	-	-	-	-	-	-	-	-	-	-	-	-	-	-	-	-	-	-	-	0.3774 (20/53)	-	-	-	-	-	-	-	-
15	75663368	C	A	Top1mt	ENSMUST00000000958.8	c.1520G>T	p.Ser507Ile	missense_variant	2	-	-	-	-	-	-	-	-	-	-	-	-	-	-	-	-	-	-	-	-	-	-	-	-	0.2571 (18/70)	-	-	-	-	-	-	0.3846 (20/52)	-	-	-	-	-	-	-	-
15	75663368	C	A	Gm15945	ENSMUST00000146755.1	n.649C>A		non_coding_transcript_exon_variant	2	-	-	-	-	-	-	-	-	-	-	-	-	-	-	-	-	-	-	-	-	-	-	-	-	0.2571 (18/70)	-	-	-	-	-	-	0.3846 (20/52)	-	-	-	-	-	-	-	-
15	76120655	T	G	BC024139	ENSMUST00000054022.11	c.1820A>C	p.Glu607Ala	missense_variant	1	-	-	-	-	-	-	-	-	-	-	-	-	-	-	-	-	-	-	-	-	-	-	-	-	-	-	-	-	-	-	-	-	-	-	-	-	-	-	-	-
15	76172363	C	G	Plec	ENSMUST00000073418.12	c.13883G>C	p.Gly4628Ala	missense_variant	3	-	-	-	-	-	-	-	-	-	-	-	-	-	-	-	-	-	-	-	-	-	-	-	-	-	-	-	-	-	-	-	-	-	-	-	-	-	-	-	-
15	76173692	C	G	Plec	ENSMUST00000073418.12	c.12554G>C	p.Arg4185Pro	missense_variant	2	-	-	-	-	-	-	-	-	-	-	-	-	-	-	-	-	-	-	-	-	-	-	-	-	-	-	-	-	-	-	-	-	-	-	-	-	-	-	-	-
15	76268354	G	A	Spatc1	ENSMUST00000074173.3	c.183G>A	p.Ala61Ala	synonymous_variant	1	-	-	-	-	-	-	-	-	-	-	-	-	-	-	-	-	-	-	-	-	-	-	-	-	-	-	-	-	-	-	-	-	-	-	-	-	-	-	-	-
15	76297183	A	T	Oplah	ENSMUST00000023222.12	c.3556T>A	p.Phe1186Ile	missense_variant	1	-	-	-	-	-	-	-	-	-	-	-	-	-	-	-	-	-	-	-	-	-	-	-	-	-	-	-	-	-	-	-	-	-	-	-	-	-	-	-	-
15	76338250	T	G	Rps6-ps1	ENSMUST00000074205.5	n.635T>G		non_coding_transcript_exon_variant	1	-	-	-	-	-	-	-	-	-	-	-	-	-	-	-	-	-	-	-	-	-	-	-	-	-	-	-	-	-	-	-	-	-	-	-	-	-	-	-	-
15	76352754	T	G	Maf1	ENSMUST00000023212.14	c.192T>G	p.Thr64Thr	synonymous_variant	2	-	-	-	-	-	-	-	-	-	-	-	-	-	-	-	-	-	-	-	-	-	-	-	-	-	-	-	-	-	-	-	-	-	-	-	-	-	-	-	-
15	76536940	GGGGT	G	Fbxl6	ENSMUST00000023219.7	c.918_921delACCC	p.Pro307fs	frameshift_variant	1	-	-	-	-	-	-	-	-	-	-	0.1379 (8/58)	-	-	-	-	-	-	-	-	-	-	-	-	-	-	-	-	-	-	-	-	-	-	-	-	-	-	-	-	-
15	76646331	C	T	Cyhr1	ENSMUSG00000053929	n.76646331G>A		intragenic_variant	1	-	-	-	-	0.1694 (21/124)	-	-	-	-	-	-	-	-	-	-	-	-	-	-	-	-	-	-	-	-	-	-	-	-	-	-	-	-	-	-	-	-	-	-	-
15	76691139	C	T	Ppp1r16a	ENSMUST00000037551.14	c.246C>T	p.Asn82Asn	synonymous_variant	1	-	-	-	-	-	-	-	-	-	-	-	-	-	-	-	-	-	-	-	-	-	0.122 (10/82)	-	-	-	-	-	-	-	-	-	-	-	-	-	-	-	-	-	-
15	77393581	T	C	Apol7a	ENSMUST00000010745.12	c.14-48A>G		intron_variant	1	-	-	-	-	-	-	-	-	-	-	-	-	-	-	-	-	-	-	-	-	-	-	-	-	-	-	-	-	-	-	-	-	-	-	-	-	-	-	-	-
15	77585857	GT	G	Apol10b	ENSMUST00000089465.4	c.165-47delA		intron_variant	1	-	-	-	-	-	-	-	-	-	-	-	-	-	-	-	-	-	-	-	-	-	-	-	-	-	-	-	-	-	-	-	-	-	-	-	-	-	-	-	-
15	77735656	A	C	Apol9b	ENSMUST00000109775.2	c.651A>C	p.Glu217Asp	missense_variant	1	-	-	-	-	-	-	-	-	-	-	-	-	-	-	-	-	-	-	-	-	-	-	-	-	-	-	-	-	-	-	-	-	-	-	-	-	-	-	-	-
15	78262183	T	A	Ncf4	ENSMUST00000096357.11	c.825-13T>A		intron_variant	1	-	-	-	-	-	-	-	-	-	-	-	-	-	0.4259 (23/54)	-	-	-	-	-	-	-	-	-	-	-	-	-	-	-	-	-	-	-	-	-	-	-	-	-	-
15	78284472	C	T	Csf2rb2	ENSMUST00000096356.3	c.2482G>A	p.Gly828Arg	missense_variant	1	-	-	-	-	-	-	-	-	-	-	-	-	-	-	-	-	-	-	-	-	-	-	-	-	-	-	-	-	-	-	-	-	-	-	-	-	-	-	-	-
15	78284865	T	C	Csf2rb2	ENSMUST00000096356.3	c.2089A>G	p.Ser697Gly	missense_variant	1	-	-	-	-	-	-	-	-	-	-	-	-	-	-	-	-	-	-	-	-	-	-	-	-	-	-	-	-	-	-	-	-	-	-	-	-	-	-	-	-
15	78912022	T	C	Sh3bp1	ENSMUST00000001226.9	c.*307T>C		3_prime_UTR_variant	2	-	-	-	-	-	-	-	-	-	-	-	-	-	-	-	-	-	-	-	-	-	-	-	-	-	-	-	-	-	-	-	-	-	-	-	-	-	-	-	-
15	78912022	T	C	1700027A07Rik	ENSMUST00000150472.1	n.402A>G		non_coding_transcript_exon_variant	2	-	-	-	-	-	-	-	-	-	-	-	-	-	-	-	-	-	-	-	-	-	-	-	-	-	-	-	-	-	-	-	-	-	-	-	-	-	-	-	-
15	79258735	G	C	Baiap2l2	ENSMUST00000165408.7	c.1493+69C>G		intron_variant	1	-	-	-	-	-	-	-	-	-	-	-	-	-	-	-	-	-	-	-	-	-	-	-	-	-	-	-	-	-	-	-	-	-	0.1867 (14/75)	-	-	-	-	-	-
15	80672171	T	C	Fam83f	ENSMUST00000023044.5	c.255T>C	p.Ala85Ala	synonymous_variant	1	-	-	-	-	-	-	-	-	-	-	-	-	-	-	-	-	-	-	-	0.4091 (9/22)	-	-	-	-	-	-	-	-	-	-	-	-	-	-	-	-	-	-	-	-
15	80948522	C	T	Adsl	ENSMUST00000023043.8	c.-26C>T		5_prime_UTR_premature_start_codon_gain_variant&5_prime_UTR_variant	1	-	-	-	-	-	-	-	-	-	-	-	-	-	-	-	-	-	-	-	-	-	-	-	-	-	-	-	-	-	-	-	-	-	-	-	-	-	-	-	-
15	81022560	T	C	Mkl1	ENSMUST00000109579.8	c.245-2A>G		splice_acceptor_variant&intron_variant	1	-	-	-	-	-	-	-	-	-	-	-	-	-	0.175 (7/40)	-	-	-	-	-	-	-	-	-	-	-	-	-	-	-	-	-	-	-	-	-	-	-	-	-	-
15	81779177	G	A	Zc3h7b	ENSMUST00000109554.1	c.1369G>A	p.Gly457Ser	missense_variant	1	-	-	-	-	-	-	-	-	-	-	-	-	-	-	-	-	-	-	-	-	-	-	-	-	-	-	-	-	-	-	-	-	-	-	-	-	-	-	-	-
15	82086306	A	AT	Mei1	ENSMUST00000089178.9	c.1182-20dupT		intron_variant	1	-	-	-	-	-	-	-	-	-	-	-	-	0.129 (4/31)	-	-	-	-	-	-	-	-	-	-	-	-	-	-	-	-	-	-	-	-	-	-	-	-	-	-	-
15	82856220	C	G	Tcf20	ENSMUST00000109510.8	c.1029G>C	p.Gln343His	missense_variant	1	-	-	-	-	-	-	-	-	-	-	-	-	-	-	-	-	-	-	-	-	-	-	-	-	-	-	-	-	-	-	-	-	-	-	-	-	-	-	-	-
15	84557200	G	C	Ldoc1l	ENSMUST00000069476.4	c.-7C>G		5_prime_UTR_variant	2	-	-	-	-	-	-	-	-	-	-	-	-	-	-	-	-	-	-	-	-	-	-	-	-	-	-	-	-	-	-	-	-	-	-	-	-	-	-	-	-
15	84938350	C	T	Nup50	ENSMUST00000165443.2	c.1080-8C>T		splice_region_variant&intron_variant	1	-	-	-	-	-	-	-	-	-	-	-	-	-	-	-	-	-	-	-	-	-	-	-	-	-	-	-	-	-	-	-	-	-	-	-	-	-	-	-	-
15	85121577	AT	A	Smc1b	ENSMUST00000023068.6	c.1113+11delA		intron_variant	1	-	-	-	-	-	-	-	-	0.2532 (20/79)	-	-	-	-	-	-	-	-	-	-	-	-	-	-	-	-	-	-	-	-	-	-	-	-	-	-	-	-	-	-	-
15	85386991	G	C	Atxn10	ENSMUST00000163242.1	c.729G>C	p.Arg243Ser	missense_variant&splice_region_variant	1	0.4894 (23/47)	-	-	-	-	-	-	-	-	-	-	-	-	-	-	-	-	-	-	-	-	-	-	-	-	-	-	-	-	-	-	-	-	-	-	-	-	-	-	-
15	85817166	G	T	Pkdrej	ENSMUST00000064370.4	c.4568C>A	p.Ser1523Tyr	missense_variant	1	-	-	-	-	-	-	-	-	-	-	-	-	-	-	-	-	-	-	-	-	-	-	-	-	-	-	-	-	-	-	-	-	-	-	-	-	-	-	-	-
15	88689650	T	G	Brd1	ENSMUST00000109381.7	c.3245A>C	p.Lys1082Thr	missense_variant	1	-	-	-	-	-	-	-	-	-	0.2353 (32/136)	-	-	-	-	-	-	-	-	-	-	-	-	-	-	-	-	-	-	-	-	-	-	-	-	-	-	-	-	-	-
15	88784183	A	AT	Zbed4	ENSMUST00000041297.14	c.*957dupT		3_prime_UTR_variant	5	-	-	-	-	-	-	-	-	-	0.2 (4/20)	-	-	-	-	-	-	-	-	-	-	-	-	-	-	-	-	-	-	-	-	-	-	-	-	-	-	-	-	-	-
15	88784183	AT	A	Zbed4	ENSMUST00000041297.14	c.*957delT		3_prime_UTR_variant	1	-	-	-	-	-	-	-	-	-	-	-	-	-	-	-	-	-	-	-	-	-	-	-	-	-	-	-	-	-	-	-	-	-	-	-	-	-	-	-	-
15	89156995	G	A	Plxnb2	ENSMUST00000060808.9	c.5347C>T	p.Arg1783Trp	missense_variant&splice_region_variant	1	-	-	-	-	-	-	-	-	-	-	-	-	-	-	-	-	-	-	-	-	-	-	-	-	-	-	-	-	-	-	-	-	-	-	-	-	-	-	-	-
15	89280305	G	C	Ppp6r2	ENSMUST00000088788.3	c.1765-54G>C		intron_variant	3	-	-	-	-	-	-	-	-	-	-	-	-	-	-	-	-	-	-	-	-	-	-	-	-	-	-	-	-	-	-	-	-	-	-	-	-	-	-	-	-
15	91343844	T	C	Slc2a13	ENSMUST00000109283.1	c.1166-22A>G		intron_variant	1	-	-	-	-	-	-	-	-	-	-	-	-	-	-	-	-	-	-	-	-	-	-	-	-	-	-	-	-	-	-	-	-	-	-	-	-	-	-	-	-
15	91731530	G	A	Lrrk2	ENSMUST00000060642.6	c.2566G>A	p.Val856Met	missense_variant	2	-	-	-	-	-	-	-	-	-	-	-	-	-	-	-	-	-	-	-	-	-	-	-	-	-	-	-	-	-	-	-	-	-	-	-	-	-	-	-	-
15	96356802	TATTA	T	Arid2	ENSMUST00000096250.4	c.531_534delTAAT	p.Ile177fs	frameshift_variant	2	-	-	-	-	-	-	-	-	-	-	-	-	-	-	-	-	-	-	-	-	-	-	-	-	-	-	-	-	-	-	-	-	-	-	-	-	-	-	-	-
15	96370994	C	A	Arid2	ENSMUST00000096250.4	c.2987C>A	p.Ser996*	stop_gained	1	-	-	-	-	-	-	-	-	-	-	-	-	-	-	-	-	-	-	-	-	-	-	-	-	-	-	-	-	-	-	-	-	-	-	-	-	-	-	-	-
15	97761202	C	G	Rapgef3	ENSMUST00000126854.8	c.408G>C	p.Val136Val	synonymous_variant	1	-	-	-	-	-	-	-	-	-	-	-	-	-	-	0.5135 (19/37)	-	-	-	-	-	-	-	-	-	-	-	-	-	-	-	-	-	-	-	-	-	-	-	-	-
15	97761202	C	G	Rapgef3os1	ENSMUST00000149373.1	n.189+606C>G		intron_variant	1	-	-	-	-	-	-	-	-	-	-	-	-	-	-	0.5135 (19/37)	-	-	-	-	-	-	-	-	-	-	-	-	-	-	-	-	-	-	-	-	-	-	-	-	-
15	97988568	C	T	Col2a1	ENSMUST00000023123.14	c.1414G>A	p.Glu472Lys	missense_variant	1	-	-	-	0.4762 (10/21)	-	-	-	-	-	-	-	-	-	-	-	-	-	-	-	-	-	-	-	-	-	-	-	-	-	-	-	-	-	-	-	-	-	-	-	-
15	98570831	C	CT	Ccnt1	ENSMUSG00000011960	n.98570832dupA		intragenic_variant	1	-	-	-	-	-	-	-	0.2097 (13/62)	-	-	-	-	-	-	-	-	-	-	-	-	-	-	-	-	-	-	-	-	-	-	-	-	-	-	-	-	-	-	-	-
15	98650286	G	A	Ddx23	ENSMUST00000003450.14	c.1237C>T	p.Pro413Ser	missense_variant	2	-	-	-	-	-	-	-	-	-	-	-	-	-	-	-	-	-	-	-	-	-	-	-	-	0.459 (84/183)	-	-	-	-	-	-	0.3704 (10/27)	-	-	-	-	-	-	-	-
15	98845468	T	A	Kmt2d	ENSMUST00000023741.15	c.11810A>T	p.Gln3937Leu	missense_variant	1	-	-	-	-	-	-	-	-	-	-	-	-	-	-	-	-	-	-	-	-	0.1667 (8/48)	-	-	-	-	-	-	-	-	-	-	-	-	-	-	-	-	-	-	-
15	98850729	C	T	Kmt2d	ENSMUST00000023741.15	c.8713G>A	p.Glu2905Lys	missense_variant	1	-	-	-	-	-	-	-	-	-	-	-	-	-	-	-	-	-	-	-	-	-	-	-	-	-	-	-	-	-	-	-	-	-	-	-	-	-	-	-	-
15	98852368	T	C	Kmt2d	ENSMUST00000023741.15	c.7443A>G	p.Thr2481Thr	synonymous_variant	1	-	-	-	-	-	-	-	-	-	-	-	-	-	-	-	-	-	-	-	-	-	-	-	-	-	-	-	-	-	-	-	-	-	-	-	-	-	-	-	-
15	99212233	C	A	Spats2	ENSMUST00000063517.4	c.1510C>A	p.Arg504Ser	missense_variant	1	-	-	-	-	-	-	-	-	-	-	-	-	-	-	-	-	-	-	-	-	-	-	-	-	-	-	-	-	-	-	-	-	-	-	-	-	-	-	-	-
15	99719138	C	A	Gpd1	ENSMUST00000023760.12	c.224C>A	p.Ala75Asp	missense_variant	1	-	-	-	-	-	-	-	-	-	-	-	-	-	-	-	-	-	-	-	-	-	-	-	-	-	-	-	-	-	-	-	-	-	-	-	-	-	-	-	-
15	99719138	C	A	Gm16537	ENSMUST00000161529.1	n.405+2776G>T		intron_variant	1	-	-	-	-	-	-	-	-	-	-	-	-	-	-	-	-	-	-	-	-	-	-	-	-	-	-	-	-	-	-	-	-	-	-	-	-	-	-	-	-
15	99918384	T	TA	Fam186a	ENSMUST00000100209.4	c.*66dupT		3_prime_UTR_variant	1	-	-	-	-	-	-	-	-	-	-	-	-	-	-	-	-	-	-	-	-	-	-	-	-	-	-	-	-	-	-	-	-	-	-	-	-	-	-	-	-
15	101433265	T	C	Krt87	ENSMUST00000081945.3	c.1099A>G	p.Thr367Ala	missense_variant	1	-	-	-	-	-	-	-	-	-	-	-	-	-	-	-	-	-	-	-	-	-	-	-	-	-	-	-	-	-	0.2338 (18/77)	-	-	-	-	-	-	-	-	-	-
15	101433272	A	G	Krt87	ENSMUST00000081945.3	c.1092T>C	p.Ala364Ala	synonymous_variant	1	-	-	-	-	-	-	-	-	-	-	-	-	-	-	-	-	-	-	-	-	-	-	-	-	-	-	-	-	-	0.1618 (11/68)	-	-	-	-	-	-	-	-	-	-
15	101433649	A	G	Krt87	ENSMUST00000081945.3	c.984T>C	p.Asn328Asn	synonymous_variant	1	-	-	-	-	-	-	-	-	-	-	-	-	-	-	-	-	-	-	-	-	-	-	-	-	-	-	-	-	-	0.2742 (17/62)	-	-	-	-	-	-	-	-	-	-
15	101433682	T	C	Krt87	ENSMUST00000081945.3	c.951A>G	p.Gly317Gly	synonymous_variant	1	-	-	-	-	-	-	-	-	-	-	-	-	-	-	-	-	-	-	-	-	-	-	-	-	-	-	-	-	-	0.2903 (27/93)	-	-	-	-	-	-	-	-	-	-
15	101433697	T	G	Krt87	ENSMUST00000081945.3	c.936A>C	p.Thr312Thr	synonymous_variant	1	-	-	-	-	-	-	-	-	-	-	-	-	-	-	-	-	-	-	-	-	-	-	-	-	-	-	-	-	-	0.2297 (17/74)	-	-	-	-	-	-	-	-	-	-
15	101436627	C	T	Krt87	ENSMUST00000081945.3	c.498G>A	p.Ala166Ala	synonymous_variant	1	-	-	-	-	-	-	-	-	-	-	-	-	-	-	-	-	-	-	-	-	-	-	-	-	-	-	-	-	-	0.25 (5/20)	-	-	-	-	-	-	-	-	-	-
15	101474621	A	C	Krt86	ENSMUST00000088049.3	c.451A>C	p.Met151Leu	missense_variant	1	-	-	-	-	-	-	-	-	-	-	-	-	-	-	-	-	-	-	-	-	-	-	-	-	-	-	-	-	-	0.5 (15/30)	-	-	-	-	-	-	-	-	-	-
15	101474653	G	A	Krt86	ENSMUST00000088049.3	c.483G>A	p.Ala161Ala	synonymous_variant	2	-	-	-	-	-	-	-	-	-	-	0.125 (9/72)	-	-	-	-	-	-	-	-	-	-	-	-	-	-	-	-	-	-	0.4483 (13/29)	-	-	-	-	-	-	-	-	-	-
15	101474671	G	A	Krt86	ENSMUST00000088049.3	c.501G>A	p.Glu167Glu	synonymous_variant	1	-	-	-	-	-	-	-	-	-	-	-	-	-	-	-	-	-	-	-	-	-	-	-	-	-	-	-	-	-	0.4286 (12/28)	-	-	-	-	-	-	-	-	-	-
15	101474683	C	G	Krt86	ENSMUST00000088049.3	c.513C>G	p.Ala171Ala	synonymous_variant	1	-	-	-	-	-	-	-	-	-	-	-	-	-	-	-	-	-	-	-	-	-	-	-	-	-	-	-	-	-	0.2105 (4/19)	-	-	-	-	-	-	-	-	-	-
15	101476247	C	T	Krt86	ENSMUST00000088049.3	c.686C>T	p.Ala229Val	missense_variant	1	-	-	-	-	-	-	-	-	-	-	-	-	-	-	-	-	-	-	-	-	-	-	-	-	-	-	-	-	-	0.5417 (13/24)	-	-	-	-	-	-	-	-	-	-
15	101476248	A	G	Krt86	ENSMUST00000088049.3	c.687A>G	p.Ala229Ala	synonymous_variant	1	-	-	-	-	-	-	-	-	-	-	-	-	-	-	-	-	-	-	-	-	-	-	-	-	-	-	-	-	-	0.5 (13/26)	-	-	-	-	-	-	-	-	-	-
15	101476546	T	C	Krt86	ENSMUST00000088049.3	c.819T>C	p.Cys273Cys	synonymous_variant	1	-	-	-	-	-	-	-	-	-	-	-	-	-	-	-	-	-	-	-	-	-	-	-	-	-	-	-	-	-	0.6923 (9/13)	-	-	-	-	-	-	-	-	-	-
15	101477330	G	A	Krt86	ENSMUST00000088049.3	c.1105G>A	p.Ala369Thr	missense_variant	1	-	-	-	-	-	-	-	-	-	-	-	-	-	-	-	-	-	-	-	-	-	-	-	-	-	-	-	-	-	0.4167 (5/12)	-	-	-	-	-	-	-	-	-	-
15	101477332	T	A	Krt86	ENSMUST00000088049.3	c.1107T>A	p.Ala369Ala	synonymous_variant	1	-	-	-	-	-	-	-	-	-	-	-	-	-	-	-	-	-	-	-	-	-	-	-	-	-	-	-	-	-	0.3333 (4/12)	-	-	-	-	-	-	-	-	-	-
15	101477343	G	A	Krt86	ENSMUST00000088049.3	c.1118G>A	p.Gly373Asp	missense_variant	1	-	-	-	-	-	-	-	-	-	-	-	-	-	-	-	-	-	-	-	-	-	-	-	-	-	-	-	-	-	0.3333 (6/18)	-	-	-	-	-	-	-	-	-	-
15	101477344	T	G	Krt86	ENSMUST00000088049.3	c.1119T>G	p.Gly373Gly	synonymous_variant	1	-	-	-	-	-	-	-	-	-	-	-	-	-	-	-	-	-	-	-	-	-	-	-	-	-	-	-	-	-	0.35 (7/20)	-	-	-	-	-	-	-	-	-	-
15	101488381	A	T	Krt83	ENSMUST00000023718.7	c.624T>A	p.Ala208Ala	synonymous_variant	3	-	-	-	-	-	-	-	-	-	-	0.431 (25/58)	-	-	-	-	-	-	-	-	-	-	-	-	-	-	-	-	-	-	0.4545 (50/110)	-	-	-	-	-	-	-	-	-	-
15	101488382	G	A	Krt83	ENSMUST00000023718.7	c.623C>T	p.Ala208Val	missense_variant	3	-	-	-	-	-	-	-	-	-	-	0.4237 (25/59)	-	-	-	-	-	-	-	-	-	-	-	-	-	-	-	-	-	-	0.4545 (50/110)	-	-	-	-	-	-	-	-	-	-
15	101489661	C	T	Krt83	ENSMUST00000023718.7	c.495G>A	p.Glu165Glu	synonymous_variant	2	-	-	-	-	-	-	-	-	-	-	0.2 (6/30)	-	-	-	-	-	-	-	-	-	-	-	-	-	-	-	-	-	-	-	-	-	-	-	-	-	-	-	-	-
15	101489787	G	T	Krt83	ENSMUST00000023718.7	c.369C>A	p.Arg123Arg	synonymous_variant	1	-	-	-	-	-	-	-	-	-	-	-	-	-	-	-	-	-	-	-	-	-	-	-	-	-	-	-	-	-	-	-	-	-	-	-	-	-	-	-	-
15	101489795	G	A	Krt83	ENSMUST00000023718.7	c.364-3C>T		splice_region_variant&intron_variant	1	-	-	-	-	-	-	-	-	-	-	-	-	-	-	-	-	-	-	-	-	-	-	-	-	-	-	-	-	-	-	-	-	-	-	-	-	-	-	-	-
15	101542743	C	T	Krt82	ENSMUST00000023713.8	c.1230G>A	p.Gly410Gly	synonymous_variant	1	-	-	-	-	-	-	-	-	-	-	0.75 (9/12)	-	-	-	-	-	-	-	-	-	-	-	-	-	-	-	-	-	-	-	-	-	-	-	-	-	-	-	-	-
15	101542744	C	G	Krt82	ENSMUST00000023713.8	c.1229G>C	p.Gly410Ala	missense_variant	1	-	-	-	-	-	-	-	-	-	-	0.75 (9/12)	-	-	-	-	-	-	-	-	-	-	-	-	-	-	-	-	-	-	-	-	-	-	-	-	-	-	-	-	-
15	101542753	C	G	Krt82	ENSMUST00000023713.8	c.1220G>C	p.Cys407Ser	missense_variant	1	-	-	-	-	-	-	-	-	-	-	-	-	0.1852 (5/27)	-	-	-	-	-	-	-	-	-	-	-	-	-	-	-	-	-	-	-	-	-	-	-	-	-	-	-
15	101542761	C	T	Krt82	ENSMUST00000023713.8	c.1212G>A	p.Val404Val	synonymous_variant	1	-	-	-	-	-	-	-	-	-	-	-	-	-	-	-	-	-	-	-	-	-	-	-	-	-	-	-	-	-	0.6875 (11/16)	-	-	-	-	-	-	-	-	-	-
15	101542775	G	C	Krt82	ENSMUST00000023713.8	c.1198C>G	p.Gln400Glu	missense_variant	1	-	-	-	-	-	-	-	-	-	-	-	-	0.16 (4/25)	-	-	-	-	-	-	-	-	-	-	-	-	-	-	-	-	-	-	-	-	-	-	-	-	-	-	-
15	101555400	G	T	Krt90	ENSMUST00000023714.4	c.1218C>A	p.Ala406Ala	synonymous_variant	1	-	-	-	-	-	-	-	-	-	-	-	-	-	-	-	-	-	-	-	-	-	-	-	-	-	-	-	-	-	1.0 (15/15)	-	-	-	-	-	-	-	-	-	-
15	101555402	C	T	Krt90	ENSMUST00000023714.4	c.1216G>A	p.Ala406Thr	missense_variant	1	-	-	-	-	-	-	-	-	-	-	-	-	-	-	-	-	-	-	-	-	-	-	-	-	-	-	-	-	-	0.9444 (17/18)	-	-	-	-	-	-	-	-	-	-
15	101555413	T	C	Krt90	ENSMUST00000023714.4	c.1205A>G	p.Lys402Arg	missense_variant	1	-	-	-	-	-	-	-	-	-	-	-	-	-	-	-	-	-	-	-	-	-	-	-	-	-	-	-	-	-	1.0 (19/19)	-	-	-	-	-	-	-	-	-	-
15	101558388	G	A	Krt90	ENSMUST00000023714.4	c.759C>T	p.Asp253Asp	synonymous_variant	1	-	-	-	-	-	-	-	-	-	-	-	-	-	-	-	-	-	-	-	-	-	-	-	-	-	-	-	-	-	0.1346 (7/52)	-	-	-	-	-	-	-	-	-	-
15	101570225	T	G	Krt75	ENSMUST00000042957.5	c.973A>C	p.Lys325Gln	missense_variant	1	-	-	-	-	-	-	-	-	-	-	-	-	-	-	-	-	-	-	-	-	-	-	-	-	-	-	-	-	-	-	-	-	-	-	-	-	-	-	-	-
15	101570225	T	G	Gm44460	ENSMUST00000196179.1	n.43T>G		non_coding_transcript_exon_variant	1	-	-	-	-	-	-	-	-	-	-	-	-	-	-	-	-	-	-	-	-	-	-	-	-	-	-	-	-	-	-	-	-	-	-	-	-	-	-	-	-
15	101645679	T	C	Gm5478	ENSMUST00000100184.3	c.-692A>G		5_prime_UTR_variant	1	-	-	-	-	-	-	-	-	-	-	-	-	-	-	-	-	-	-	-	-	-	-	-	-	-	-	-	-	-	-	-	-	-	-	-	-	-	-	-	-
15	101645682	A	G	Gm5478	ENSMUST00000100184.3	c.-695T>C		5_prime_UTR_variant	1	-	-	-	-	-	-	-	-	-	-	-	-	-	-	-	-	-	-	-	-	-	-	-	-	-	-	-	-	-	-	-	-	-	-	-	-	-	-	-	-
15	101646895	G	A	Gm5478	ENSMUST00000100184.3	c.-1040C>T		5_prime_UTR_premature_start_codon_gain_variant&5_prime_UTR_variant	1	-	-	-	-	-	-	-	-	-	-	-	-	-	-	-	-	-	-	-	-	-	-	-	-	-	-	-	-	-	-	-	-	-	-	-	-	-	-	-	-
15	101864351	C	A	Krt77	ENSMUST00000087996.5	c.792G>T	p.Arg264Arg	synonymous_variant	1	-	-	-	-	-	-	-	-	-	-	-	-	-	-	-	-	-	-	-	-	-	-	-	-	-	-	-	-	-	-	-	-	-	-	-	-	-	-	-	-
15	101864363	T	C	Krt77	ENSMUST00000087996.5	c.780A>G	p.Glu260Glu	synonymous_variant	1	-	-	-	-	-	-	-	-	-	-	-	-	-	-	-	-	-	-	-	-	-	-	-	-	-	-	-	-	-	-	-	-	-	-	-	-	-	-	-	-
15	101865471	G	C	Krt77	ENSMUST00000087996.5	c.747C>G	p.Val249Val	synonymous_variant	1	-	-	-	-	-	-	-	-	-	-	-	-	-	-	-	-	-	-	-	-	-	-	-	-	-	-	-	-	-	0.1915 (9/47)	-	-	-	-	-	-	-	-	-	-
15	101865473	C	G	Krt77	ENSMUST00000087996.5	c.745G>C	p.Val249Leu	missense_variant	1	-	-	-	-	-	-	-	-	-	-	-	-	-	-	-	-	-	-	-	-	-	-	-	-	-	-	-	-	-	0.1875 (9/48)	-	-	-	-	-	-	-	-	-	-
15	101869286	G	C	Krt77	ENSMUST00000087996.5	c.333C>G	p.Gly111Gly	synonymous_variant	1	-	-	-	-	-	-	-	-	-	-	-	-	-	-	-	-	-	-	-	-	-	-	-	-	-	-	-	-	-	-	-	-	-	-	-	-	-	-	-	-
15	101931551	C	T	Krt79	ENSMUST00000023799.7	c.1009-1G>A		splice_acceptor_variant&intron_variant	1	-	-	-	-	-	-	-	-	-	-	0.1923 (5/26)	-	-	-	-	-	-	-	-	-	-	-	-	-	-	-	-	-	-	-	-	-	-	-	-	-	-	-	-	-
15	102031837	A	T	Krt18	ENSMUST00000023803.6	c.1152-4A>T		splice_region_variant&intron_variant	1	-	-	-	-	-	-	-	-	-	-	-	-	-	-	-	-	-	-	-	-	-	-	-	-	-	-	-	-	-	-	-	-	-	-	-	-	-	-	-	-
15	102316840	G	GA	Espl1	ENSMUST00000064924.4	c.4489dupA	p.Ser1497fs	frameshift_variant	1	-	-	-	-	-	-	-	-	-	-	-	-	-	-	-	-	-	-	-	-	-	-	-	-	-	-	-	-	-	-	-	-	-	-	-	-	-	-	-	-
15	102474156	T	A	Pcbp2	ENSMUST00000077037.11	c.93+2T>A		splice_donor_variant&intron_variant	3	-	-	-	-	-	-	-	-	-	-	-	-	-	-	-	0.875 (14/16)	-	-	-	-	-	-	-	-	-	-	-	-	-	-	-	-	-	-	-	-	0.8462 (11/13)	-	-	-
15	102474156	T	A	Gm26518	ENSMUST00000181328.1	n.3201+6366A>T		intron_variant	3	-	-	-	-	-	-	-	-	-	-	-	-	-	-	-	0.875 (14/16)	-	-	-	-	-	-	-	-	-	-	-	-	-	-	-	-	-	-	-	-	0.8462 (11/13)	-	-	-
15	102635147	T	A	Rpl39-ps	ENSMUST00000142604.1	n.166T>A		non_coding_transcript_exon_variant	1	-	-	-	-	-	-	-	-	-	-	-	-	-	-	-	-	-	-	-	-	-	-	-	-	-	-	-	-	-	-	-	-	-	-	-	-	-	-	-	-
15	103243080	G	A	Hnrnpa1	ENSMUST00000036004.15	c.910G>A	p.Gly304Arg	missense_variant&splice_region_variant	1	-	-	-	-	-	-	-	-	-	-	-	-	-	-	-	-	-	-	-	-	-	-	-	-	-	-	-	-	-	-	-	-	-	-	-	-	-	-	-	-
15	103251034	C	A	Nfe2	ENSMUST00000133600.7	c.78G>T	p.Pro26Pro	synonymous_variant	1	0.2258 (7/31)	-	-	-	-	-	-	-	-	-	-	-	-	-	-	-	-	-	-	-	-	-	-	-	-	-	-	-	-	-	-	-	-	-	-	-	-	-	-	-
15	103351034	T	C	Itga5	ENSMUST00000023128.6	c.2054A>G	p.Asn685Ser	missense_variant	1	-	-	-	-	-	-	-	-	-	-	-	-	-	-	-	-	-	-	-	-	-	-	-	-	-	-	-	-	-	-	-	-	-	-	-	-	-	-	-	-
15	103454999	C	CT	Nckap1l	ENSMUST00000047405.7	c.137dupT	p.Leu46fs	frameshift_variant	1	-	-	-	-	-	-	-	-	-	-	-	-	-	-	-	-	-	-	-	-	-	-	-	-	-	-	-	-	-	-	-	-	-	-	-	-	-	-	-	-
15	103481967	G	A	Nckap1l	ENSMUST00000047405.7	c.2164G>A	p.Val722Met	missense_variant	1	-	-	-	-	-	-	-	-	-	-	-	-	-	-	-	-	-	-	-	-	-	-	-	-	-	-	-	-	-	-	-	-	-	-	-	-	-	-	-	-
16	4706702	A	C	Dnaja3	ENSMUST00000060067.11	c.*148A>C		3_prime_UTR_variant	1	-	-	-	-	-	-	-	-	-	-	-	-	-	-	-	-	-	-	-	-	-	-	-	-	-	-	-	-	-	-	-	-	-	-	-	-	-	-	-	-
16	4927814	C	T	Mgrn1	ENSMUST00000023159.8	c.1208C>T	p.Ser403Phe	missense_variant	1	-	-	-	0.1276 (31/243)	-	-	-	-	-	-	-	-	-	-	-	-	-	-	-	-	-	-	-	-	-	-	-	-	-	-	-	-	-	-	-	-	-	-	-	-
16	5105998	A	C	Ppl	ENSMUST00000035672.3	c.559-34T>G		intron_variant	1	-	-	-	-	-	-	-	-	-	-	-	-	-	-	-	-	-	-	-	-	-	-	-	-	-	-	-	-	-	-	-	-	-	-	-	-	-	-	-	-
16	10212620	C	T	Atf7ip2	ENSMUST00000044005.13	c.499-33C>T		intron_variant	1	-	-	-	-	-	-	-	-	-	-	-	-	-	-	-	-	-	-	-	-	-	-	-	-	-	-	-	-	-	-	-	-	-	-	-	-	-	-	-	-
16	10801389	G	A	Gm10343	ENSMUST00000096279.4	n.21G>A		non_coding_transcript_exon_variant	1	-	-	-	-	-	-	-	-	-	-	-	-	-	-	-	-	-	-	-	-	-	-	-	-	-	-	-	-	-	-	-	-	-	-	-	-	0.3333 (4/12)	-	-	-
16	10801437	C	A	Gm10343	ENSMUST00000096279.4	n.69C>A		non_coding_transcript_exon_variant	2	-	-	-	-	-	-	-	-	-	-	-	-	-	-	-	0.75 (9/12)	-	-	-	-	-	-	-	-	-	-	-	-	-	-	-	-	-	-	-	-	-	-	-	-
16	10801449	T	C	Gm10343	ENSMUST00000096279.4	n.81T>C		non_coding_transcript_exon_variant	1	-	-	-	-	-	-	-	-	-	-	-	-	-	-	-	-	-	-	-	-	-	-	-	-	-	-	-	-	-	-	-	-	-	-	-	-	-	-	-	-
16	13416215	TC	T	Gm15738	ENSMUST00000210378.1	n.261-11530delG		intron_variant	1	-	-	-	-	-	-	-	-	-	-	-	-	-	-	-	-	-	-	-	-	-	-	-	-	-	-	-	-	-	-	-	-	-	-	-	-	-	-	-	-
16	13416215	TC	T	Mkl2	ENSMUSG00000009569	n.13416216delC		intragenic_variant	1	-	-	-	-	-	-	-	-	-	-	-	-	-	-	-	-	-	-	-	-	-	-	-	-	-	-	-	-	-	-	-	-	-	-	-	-	-	-	-	-
16	13808963	C	CT	Rrn3	ENSMUST00000023363.6	c.1439-9dupT		splice_region_variant&intron_variant	1	-	-	-	-	-	-	-	-	-	-	-	-	-	-	-	-	-	-	-	-	-	-	-	-	-	-	-	-	-	-	-	-	-	-	-	-	-	-	-	-
16	13834853	G	GA	Pdxdc1	ENSMUST00000023361.11	c.2338-8dupT		splice_region_variant&intron_variant	1	-	-	-	-	-	-	-	-	-	-	-	-	-	-	-	-	-	-	-	-	-	-	-	-	-	-	-	-	-	-	-	-	-	-	-	-	-	-	-	-
16	13834853	G	GA	Ntan1	ENSMUST00000023362.14	c.753+66dupA		intron_variant	1	-	-	-	-	-	-	-	-	-	-	-	-	-	-	-	-	-	-	-	-	-	-	-	-	-	-	-	-	-	-	-	-	-	-	-	-	-	-	-	-
16	14245577	G	A	Myh11	ENSMUST00000090287.3	c.727-13C>T		intron_variant	1	0.2769 (18/65)	-	-	-	-	-	-	-	-	-	-	-	-	-	-	-	-	-	-	-	-	-	-	-	-	-	-	-	-	-	-	-	-	-	-	-	-	-	-	-
16	14467060	G	T	Abcc1	ENSMUST00000100167.9	c.3772G>T	p.Val1258Leu	missense_variant	2	-	-	-	-	-	-	-	-	-	-	-	-	-	-	-	-	-	-	-	-	-	-	-	-	-	-	-	-	-	-	-	-	-	-	-	0.6118 (52/85)	-	-	-	-
16	14467876	C	T	Abcc1	ENSMUST00000100167.9	c.3864C>T	p.Gly1288Gly	synonymous_variant	1	-	-	-	-	-	-	-	-	-	-	-	-	-	-	-	-	-	-	-	-	-	-	-	-	-	-	-	-	-	-	-	-	-	-	-	-	-	-	-	-
16	15729969	T	A	Prkdc	ENSMUST00000023352.8	c.5872T>A	p.Phe1958Ile	missense_variant	1	-	-	-	-	-	-	-	-	-	-	-	-	-	-	-	-	-	-	-	-	-	-	-	-	-	-	-	-	-	-	-	-	-	-	-	-	-	-	-	-
16	16423867	G	C	Fgd4	ENSMUST00000161861.7	c.2043+49C>G		intron_variant	1	-	-	-	-	-	-	-	-	-	-	-	-	-	-	-	-	-	-	-	-	-	-	-	-	-	-	-	-	-	-	-	-	-	-	-	-	-	-	-	-
16	17506338	A	C	Aifm3	ENSMUST00000115685.7	c.1757+4A>C		splice_region_variant&intron_variant	1	-	-	-	-	-	-	-	-	-	-	-	-	-	-	-	-	-	-	-	-	-	-	-	-	-	-	-	-	-	-	-	-	-	-	-	-	-	-	-	-
16	19061912	T	C	Iglc1	ENSMUST00000200568.1	c.158A>G	p.Glu53Gly	missense_variant	1	-	-	-	-	-	-	-	-	-	-	-	-	-	-	0.3814 (37/97)	-	-	-	-	-	-	-	-	-	-	-	-	-	-	-	-	-	-	-	-	-	-	-	-	-
16	19061912	T	C	2010309G21Rik	ENSMUST00000198927.1	n.226-3649T>C		intron_variant	1	-	-	-	-	-	-	-	-	-	-	-	-	-	-	0.3814 (37/97)	-	-	-	-	-	-	-	-	-	-	-	-	-	-	-	-	-	-	-	-	-	-	-	-	-
16	19062019	C	T	Iglc1	ENSMUST00000200568.1	c.51G>A	p.Glu17Glu	synonymous_variant	1	-	-	-	-	-	-	-	-	-	-	-	-	-	-	-	-	-	-	-	-	-	-	-	-	-	-	-	-	-	-	-	-	-	-	-	-	-	-	-	-
16	19062019	C	T	2010309G21Rik	ENSMUST00000198927.1	n.226-3542C>T		intron_variant	1	-	-	-	-	-	-	-	-	-	-	-	-	-	-	-	-	-	-	-	-	-	-	-	-	-	-	-	-	-	-	-	-	-	-	-	-	-	-	-	-
16	19062056	G	A	Iglc1	ENSMUST00000200568.1	c.14C>T	p.Ser5Leu	missense_variant	1	-	-	-	-	-	-	-	-	-	-	-	-	-	-	-	-	-	-	-	-	-	-	-	-	-	-	-	-	-	-	-	-	-	-	-	-	-	-	-	-
16	19062056	G	A	2010309G21Rik	ENSMUST00000198927.1	n.226-3505G>A		intron_variant	1	-	-	-	-	-	-	-	-	-	-	-	-	-	-	-	-	-	-	-	-	-	-	-	-	-	-	-	-	-	-	-	-	-	-	-	-	-	-	-	-
16	19655554	A	C	Lamp3	ENSMUST00000081880.5	c.1103-34T>G		intron_variant	1	-	-	-	-	-	-	-	-	-	-	-	-	-	-	-	-	-	-	-	-	-	-	-	-	-	-	-	-	-	-	-	-	-	-	-	-	-	-	-	-
16	19769453	C	CA	B3gnt5	ENSMUST00000079780.9	c.427dupA	p.Arg143fs	frameshift_variant	2	-	-	-	-	-	-	-	-	-	-	-	-	-	-	-	-	-	-	-	-	-	-	-	-	-	-	-	-	-	-	-	-	-	-	-	-	-	-	-	-
16	20655278	G	A	Psmd2	ENSMUST00000007212.8	c.730G>A	p.Glu244Lys	missense_variant	2	-	-	-	-	-	-	-	-	-	-	-	-	-	-	-	-	-	-	-	-	-	-	-	-	-	-	-	-	-	-	-	-	-	-	-	-	-	-	-	-
16	20686738	T	G	Eif4g1	ENSMUST00000044783.13	c.3781-22T>G		intron_variant	1	-	-	-	-	-	-	-	-	-	-	-	-	-	-	-	-	-	-	-	-	-	-	-	-	-	-	-	-	-	-	-	-	-	-	-	-	-	-	-	-
16	20822490	A	G	Rps10-ps2	ENSMUST00000127484.1	n.151T>C		non_coding_transcript_exon_variant	1	-	-	-	-	-	-	-	-	-	-	-	-	-	-	-	-	-	-	-	-	-	-	-	-	-	-	-	-	-	-	-	-	-	-	-	-	-	-	-	-
16	23109110	C	CT	Eif4a2	ENSMUST00000115341.9	c.212-3dupT		splice_acceptor_variant&intron_variant	1	-	-	-	-	-	-	-	-	-	-	-	-	-	-	-	-	-	-	-	-	-	-	-	-	-	-	-	0.2381 (5/21)	-	-	-	-	-	-	-	-	-	-	-	-
16	23357922	T	C	St6gal1	ENSMUST00000023601.13	c.*52T>C		3_prime_UTR_variant	1	-	-	-	-	-	-	-	-	-	-	-	-	-	-	-	-	-	-	-	-	-	-	-	-	-	-	-	-	-	-	-	-	-	-	-	-	-	-	-	-
16	29263446	C	A	Atp13a5	ENSMUST00000075806.10	c.2769G>T	p.Trp923Cys	missense_variant&splice_region_variant	1	-	-	-	-	-	-	-	-	-	-	-	-	-	-	-	-	-	-	-	-	-	-	-	-	-	-	-	-	-	-	-	-	-	-	-	-	-	-	-	-
16	29334036	CACAGAGTGAGTGT	C	Atp13a5	ENSMUST00000075806.10	c.640_652delACACTCACTCTGT	p.Thr214fs	frameshift_variant	1	-	-	-	-	-	-	-	-	-	-	-	-	-	-	-	-	-	-	-	-	-	-	-	-	-	-	-	-	-	-	-	-	-	-	-	-	-	0.129 (16/124)	-	-
16	30348097	G	C	Atp13a3	ENSMUST00000100013.8	c.1500C>G	p.Thr500Thr	synonymous_variant	2	-	-	-	-	-	-	-	-	-	-	-	-	-	-	-	-	-	-	-	-	-	-	-	-	-	-	-	-	-	-	-	-	-	-	-	-	-	-	-	-
16	31080938	T	A	Xxylt1	ENSMUST00000055389.7	c.398A>T	p.His133Leu	missense_variant	1	-	-	-	-	-	-	-	-	-	-	-	-	-	-	-	-	-	-	-	-	-	-	-	-	-	-	-	-	-	-	-	-	-	-	-	-	-	-	-	-
16	31080942	C	A	Xxylt1	ENSMUST00000055389.7	c.394G>T	p.Ala132Ser	missense_variant	1	-	-	-	-	-	-	-	-	-	-	-	-	-	-	-	-	-	-	-	-	-	-	-	-	-	-	-	-	-	-	-	-	-	-	-	-	-	-	-	-
16	31797024	C	A	Dlg1	ENSMUST00000064477.13	c.1264+14C>A		intron_variant	1	-	-	-	-	-	-	-	-	-	-	-	-	-	-	-	-	-	-	-	-	-	-	-	-	-	-	-	-	-	-	-	-	-	-	-	-	-	0.5128 (60/117)	-	-
16	32455305	A	C	Pcyt1a	ENSMUST00000079791.10	c.211A>C	p.Thr71Pro	missense_variant	1	-	-	-	-	-	-	-	-	-	0.3377 (26/77)	-	-	-	-	-	-	-	-	-	-	-	-	-	-	-	-	-	-	-	-	-	-	-	-	-	-	-	-	-	-
16	32778783	C	CT	Muc4	ENSMUST00000096106.9	c.9788dupT	p.Ser3264fs	frameshift_variant	1	-	-	-	-	-	-	-	-	-	-	-	-	-	-	-	-	-	-	-	-	-	-	-	-	-	-	-	-	-	-	-	-	-	-	-	-	-	-	-	-
16	32778783	C	CT	Muc20	ENSMUST00000115116.7	c.*198dupA		3_prime_UTR_variant	1	-	-	-	-	-	-	-	-	-	-	-	-	-	-	-	-	-	-	-	-	-	-	-	-	-	-	-	-	-	-	-	-	-	-	-	-	-	-	-	-
16	33684748	C	G	Heg1	ENSMUST00000126532.1	c.137C>G	p.Pro46Arg	missense_variant	1	-	-	-	-	-	-	-	-	-	-	-	-	-	-	-	-	-	-	-	-	-	-	-	-	-	-	-	-	-	-	-	0.375 (6/16)	-	-	-	-	-	-	-	-
16	34721566	C	CA	Ccdc14	ENSMUST00000023532.6	c.1662dupA	p.Phe555fs	frameshift_variant	1	-	-	-	-	-	-	-	-	-	-	-	-	-	-	-	-	-	-	-	-	-	-	-	-	-	-	-	-	-	-	-	-	-	-	-	-	-	-	-	-
16	35106389	T	G	Hacd2	ENSMUST00000061156.8	c.757T>G	p.Phe253Val	missense_variant	1	-	-	-	-	0.1702 (8/47)	-	-	-	-	-	-	-	-	-	-	-	-	-	-	-	-	-	-	-	-	-	-	-	-	-	-	-	-	-	-	-	-	-	-	-
16	36156902	T	C	Stfa2l1	ENSMUST00000079184.4	c.66T>C	p.Ile22Ile	synonymous_variant	1	-	-	-	-	-	-	-	-	-	-	-	-	-	-	-	-	-	-	-	-	-	-	-	-	-	-	-	-	-	0.1667 (5/30)	-	-	-	-	-	-	-	-	-	-
16	36161812	C	T	Stfa2l1	ENSMUST00000079184.4	c.252C>T	p.Asp84Asp	synonymous_variant	1	-	-	-	-	-	-	-	-	-	-	-	-	-	-	-	-	-	-	-	-	-	-	-	-	-	-	-	-	-	0.1064 (5/47)	-	-	-	-	-	-	-	-	-	-
16	36367433	C	G	BC100530	ENSMUST00000096089.2	c.66+3G>C		splice_region_variant&intron_variant	1	-	-	-	-	-	-	-	-	-	-	-	-	-	-	-	-	-	-	-	-	-	-	-	-	-	-	-	-	-	0.3333 (6/18)	-	-	-	-	-	-	-	-	-	-
16	36367433	C	G	Gm15845	ENSMUST00000130244.1	n.181C>G		non_coding_transcript_exon_variant	1	-	-	-	-	-	-	-	-	-	-	-	-	-	-	-	-	-	-	-	-	-	-	-	-	-	-	-	-	-	0.3333 (6/18)	-	-	-	-	-	-	-	-	-	-
16	36404139	C	A	Stfa2	ENSMUST00000023619.6	c.200G>T	p.Arg67Leu	missense_variant	1	-	-	-	-	-	-	-	-	-	-	-	-	-	-	-	-	-	-	-	-	-	-	-	-	-	-	-	-	-	-	-	-	-	-	-	-	-	-	-	-
16	36450533	A	T	Gm25903-Stfa3	ENSMUSG00000089117-ENSMUSG00000054905	n.36450533A>T		intergenic_region	1	-	-	-	-	-	-	-	-	-	-	-	-	-	-	-	-	-	-	-	-	-	-	-	-	-	-	-	-	-	0.1586 (23/145)	-	-	-	-	-	-	-	-	-	-
16	36956598	GC	G	Hcls1	ENSMUST00000023531.14	c.653delC	p.Pro218fs	frameshift_variant	1	-	-	-	-	-	-	-	-	-	-	-	-	-	-	-	-	-	-	-	-	-	-	-	-	-	-	-	-	-	-	-	-	-	-	-	-	-	-	-	-
16	37882544	A	G	Lrrc58	ENSMUST00000078717.6	c.*1082A>G		3_prime_UTR_variant	2	-	-	-	-	-	-	-	-	-	-	-	-	-	-	-	-	-	0.303 (10/33)	-	-	-	-	-	-	-	-	0.2564 (10/39)	-	-	-	-	-	-	-	-	-	-	-	-	-
16	37882544	A	G	Gm15725	ENSMUST00000119947.1	n.3A>G		non_coding_transcript_exon_variant	2	-	-	-	-	-	-	-	-	-	-	-	-	-	-	-	-	-	0.303 (10/33)	-	-	-	-	-	-	-	-	0.2564 (10/39)	-	-	-	-	-	-	-	-	-	-	-	-	-
16	37883384	T	C	Lrrc58	ENSMUST00000078717.6	c.*1922T>C		3_prime_UTR_variant	1	-	-	-	-	-	-	-	-	-	-	-	-	-	-	-	0.1429 (7/49)	-	-	-	-	-	-	-	-	-	-	-	-	-	-	-	-	-	-	-	-	-	-	-	-
16	37883384	T	C	Gm15725	ENSMUST00000119947.1	n.843T>C		non_coding_transcript_exon_variant	1	-	-	-	-	-	-	-	-	-	-	-	-	-	-	-	0.1429 (7/49)	-	-	-	-	-	-	-	-	-	-	-	-	-	-	-	-	-	-	-	-	-	-	-	-
16	38005256	G	A	Gpr156	ENSMUST00000061274.7	c.1834G>A	p.Val612Ile	missense_variant	1	-	-	-	-	-	-	-	-	0.38 (19/50)	-	-	-	-	-	-	-	-	-	-	-	-	-	-	-	-	-	-	-	-	-	-	-	-	-	-	-	-	-	-	-
16	38602648	G	A	Arhgap31	ENSMUST00000023487.4	c.3055C>T	p.Pro1019Ser	missense_variant	1	-	-	-	-	-	-	-	-	-	0.1538 (16/104)	-	-	-	-	-	-	-	-	-	-	-	-	-	-	-	-	-	-	-	-	-	-	-	-	-	-	-	-	-	-
16	43979030	C	CT	Zdhhc23	ENSMUST00000165648.1	c.20dupA	p.Lys8fs	frameshift_variant	1	-	-	-	-	-	-	-	-	-	-	-	-	-	-	-	-	-	-	-	-	-	-	-	-	-	-	-	-	-	-	-	-	-	-	-	-	-	-	-	-
16	44413662	A	C	Cfap44	ENSMUST00000099742.8	c.984A>C	p.Ser328Ser	synonymous_variant	1	-	-	-	-	-	-	-	-	-	-	-	-	-	-	-	-	-	-	-	-	-	-	-	-	-	-	-	-	-	-	-	-	-	-	-	-	-	-	-	-
16	44435480	G	C	Cfap44	ENSMUST00000099742.8	c.2934G>C	p.Lys978Asn	missense_variant	1	-	-	-	-	-	0.3443 (21/61)	-	-	-	-	-	-	-	-	-	-	-	-	-	-	-	-	-	-	-	-	-	-	-	-	-	-	-	-	-	-	-	-	-	-
16	44909630	C	G	Cd200r2	ENSMUST00000102805.3	c.536C>G	p.Thr179Ser	missense_variant	1	-	-	-	-	-	-	-	-	-	-	-	-	-	-	-	-	-	-	-	-	-	-	-	-	-	-	-	-	-	-	-	-	-	-	-	-	-	-	-	-
16	45205412	G	A	Gm6030	ENSMUST00000078768.4	n.313G>A		non_coding_transcript_exon_variant	1	-	-	-	-	-	-	-	-	-	-	-	-	-	-	-	-	-	-	-	-	-	-	-	-	-	-	-	-	-	-	-	-	-	-	-	-	0.5625 (9/16)	-	-	-
16	45205429	A	C	Gm6030	ENSMUST00000078768.4	n.330A>C		non_coding_transcript_exon_variant	2	-	-	-	-	-	-	-	-	-	-	-	-	-	-	-	-	-	-	-	-	-	-	-	-	-	-	-	-	-	-	-	-	-	-	-	-	0.6 (9/15)	-	-	-
16	46395057	A	G	Nectin3	ENSMUSG00000022656	n.46395057T>C		intragenic_variant	1	-	-	-	-	-	-	-	-	-	-	-	-	-	-	-	-	-	-	-	-	-	-	-	-	-	-	-	-	-	-	-	-	-	-	-	-	-	-	-	-
16	48843522	T	G	Retnla	ENSMUST00000023329.4	c.209-31T>G		intron_variant	1	-	-	-	-	-	-	-	-	-	-	-	-	-	-	-	-	-	-	-	-	-	-	-	-	-	-	-	-	-	-	-	-	-	-	-	-	-	-	-	-
16	49198558	TA	T	Myh15	ENSMUST00000168680.1	c.*28delA		3_prime_UTR_variant	1	-	-	-	-	-	-	-	-	-	-	-	-	-	-	-	-	-	-	-	-	-	-	-	-	-	-	-	-	-	-	-	-	-	-	-	0.1 (6/60)	-	-	-	-
16	55967172	T	G	Rpl24	ENSMUST00000023269.4	c.192+2T>G		splice_donor_variant&intron_variant	1	-	-	-	-	-	-	-	-	-	-	-	-	-	-	-	-	-	-	-	-	-	-	-	-	-	-	-	-	-	-	-	-	-	-	1.0 (15/15)	-	-	-	-	-
16	55967172	T	G	Gm28037	ENSMUST00000122365.1	n.283+2T>G		splice_donor_variant&intron_variant	1	-	-	-	-	-	-	-	-	-	-	-	-	-	-	-	-	-	-	-	-	-	-	-	-	-	-	-	-	-	-	-	-	-	-	1.0 (15/15)	-	-	-	-	-
16	56034105	A	G	Trmt10c	ENSMUST00000059052.8	c.1166T>C	p.Leu389Pro	missense_variant	1	-	-	-	-	-	-	-	-	-	-	-	-	-	-	-	-	-	-	-	-	-	-	-	-	-	-	-	-	-	-	-	-	-	-	0.1573 (14/89)	-	-	-	-	-
16	56035068	G	A	Trmt10c	ENSMUST00000059052.8	c.203C>T	p.Ser68Leu	missense_variant	1	-	-	-	-	-	-	-	-	-	-	-	-	-	-	-	-	-	-	-	-	-	-	-	-	-	-	-	-	-	-	-	-	-	-	-	-	-	-	-	-
16	57040770	A	G	Tmem45a2	ENSMUST00000067173.6	c.693T>C	p.Asn231Asn	synonymous_variant	1	-	-	-	-	-	-	-	-	-	-	-	-	-	-	-	-	-	-	-	-	0.1579 (18/114)	-	-	-	-	-	-	-	-	-	-	-	-	-	-	-	-	-	-	-
16	58470587	G	A	St3gal6	ENSMUST00000114357.9	c.*60C>T		3_prime_UTR_variant	1	-	-	-	-	-	-	-	-	-	-	-	-	-	-	-	-	-	-	-	-	-	-	-	-	-	-	-	-	-	-	-	-	-	-	0.1304 (9/69)	-	-	-	-	-
16	59027355	A	C	Olfr186	ENSMUST00000062380.2	c.551T>G	p.Leu184Trp	missense_variant	1	-	-	-	-	-	-	-	-	-	-	-	-	-	-	-	-	-	-	-	-	-	-	-	-	-	-	-	-	-	-	-	-	-	-	-	-	-	-	-	-
16	59027358	G	T	Olfr186	ENSMUST00000062380.2	c.548C>A	p.Pro183Gln	missense_variant	1	-	-	-	-	-	-	-	-	-	-	-	-	-	-	-	-	-	-	-	-	-	-	-	-	-	-	-	-	-	-	-	-	-	-	-	-	-	-	-	-
16	59329359	T	C	Olfr205	ENSMUST00000074125.2	c.149A>G	p.Lys50Arg	missense_variant	1	-	-	-	-	-	-	-	-	-	-	-	-	-	-	-	-	-	-	-	-	-	-	-	-	-	-	-	-	-	-	-	-	-	-	-	-	-	-	-	-
16	62735162	C	CT	Nsun3	ENSMUST00000063089.11	c.999dupA	p.Gly334fs	frameshift_variant	1	-	-	-	-	-	-	-	-	-	-	-	-	-	-	-	-	-	-	-	-	-	-	-	-	-	-	-	-	-	-	0.1667 (4/24)	-	-	-	-	-	-	-	-	-
16	64857489	G	A	Cggbp1	ENSMUST00000067744.7	c.*1413G>A		3_prime_UTR_variant	1	-	-	-	-	-	-	-	-	-	-	-	-	-	-	-	-	-	-	-	-	-	0.1287 (13/101)	-	-	-	-	-	-	-	-	-	-	-	-	-	-	-	-	-	-
16	72935785	A	AGTTGGGTCT	Robo1	ENSMUST00000023600.7	c.928_928+1insTTGGGTCTG		splice_donor_variant&intron_variant	6	-	-	-	-	-	-	-	-	-	-	-	-	-	-	-	-	-	-	-	-	-	-	-	-	-	-	-	-	-	-	-	-	-	-	-	-	-	-	-	-
16	73044510	A	AT	Robo1	ENSMUST00000023600.7	c.*154dupT		3_prime_UTR_variant	1	-	-	-	-	-	-	-	-	-	-	-	-	-	-	-	-	-	-	-	-	-	-	-	-	-	-	-	-	-	-	-	-	-	-	-	-	-	-	-	-
16	78359325	G	A	Cxadr	ENSMUSG00000022865	n.78359325G>A		intragenic_variant	1	-	-	-	-	-	-	-	-	-	-	-	-	-	-	-	-	-	-	-	-	-	-	-	-	-	-	-	-	-	-	-	-	-	-	-	-	-	-	-	-
16	78547673	C	G	D16Ertd472e	ENSMUST00000114218.1	c.546G>C	p.Trp182Cys	missense_variant	1	-	-	-	-	-	-	-	-	-	-	-	-	-	-	-	-	-	-	-	-	-	-	-	-	-	-	-	-	-	-	-	-	-	-	-	-	-	-	-	-
16	78547801	G	C	D16Ertd472e	ENSMUST00000114218.1	c.418C>G	p.Pro140Ala	missense_variant	1	-	-	-	-	-	-	-	-	-	-	-	-	-	-	-	-	-	-	-	-	-	-	-	-	-	-	-	-	-	-	-	-	-	-	-	-	-	-	-	-
16	85015364	T	G	App	ENSMUST00000005406.10	c.1234-4A>C		splice_region_variant&intron_variant	1	-	-	-	-	-	-	-	-	-	-	-	-	-	-	-	-	-	-	-	-	-	-	-	-	-	-	-	-	-	-	-	-	-	-	-	-	-	-	-	-
16	87485789	T	TA	Cct8	ENSMUST00000026704.13	c.1284+44dupT		intron_variant	1	-	-	-	-	-	-	-	-	-	-	-	-	-	-	-	-	-	-	-	-	-	-	-	-	-	-	-	-	-	-	-	-	-	-	-	-	-	-	-	-
16	89897687	G	A	Tiam1	ENSMUST00000002588.9	c.881C>T	p.Ser294Leu	missense_variant	1	-	-	-	-	-	-	-	-	-	-	-	-	-	-	-	-	-	-	-	-	-	-	-	-	-	-	-	-	-	-	-	-	-	-	-	-	-	-	-	-
16	91170273	A	C	Gm9881	ENSMUST00000068783.2	c.562T>G	p.Leu188Val	missense_variant	1	-	-	-	-	-	-	-	-	-	-	-	-	-	-	-	-	-	-	-	-	-	-	-	-	-	-	-	-	-	-	-	-	-	-	-	-	-	-	-	-
16	94691621	C	G	Dyrk1a	ENSMUST00000023614.4	c.1712C>G	p.Thr571Ser	missense_variant	2	-	-	-	-	-	-	-	-	-	-	-	-	-	-	-	-	-	-	-	-	-	-	-	-	-	-	-	-	-	-	-	-	-	-	-	-	-	-	-	-
16	96047139	G	GA	Brwd1	ENSMUST00000153398.7	c.1680dupT	p.His561fs	frameshift_variant	2	-	-	-	-	-	-	-	-	-	-	-	-	-	-	-	-	-	-	-	-	-	-	-	-	-	-	-	-	-	-	-	-	0.2 (4/20)	-	-	-	-	-	-	-
17	5342692	G	C	Arid1b	ENSMUST00000115797.8	c.6340G>C	p.Val2114Leu	missense_variant	1	-	-	-	-	-	-	-	-	-	-	-	-	0.1163 (5/43)	-	-	-	-	-	-	-	-	-	-	-	-	-	-	-	-	-	-	-	-	-	-	-	-	-	-	-
17	8437140	T	A	T	ENSMUST00000074667.8	c.669-10T>A		intron_variant	1	-	-	-	-	-	-	-	-	-	-	-	-	-	-	-	-	-	-	-	-	-	-	-	-	-	-	-	-	-	-	-	-	-	-	-	-	-	-	-	-
17	12688353	T	G	Igf2r	ENSMUST00000024599.13	c.6597A>C	p.Lys2199Asn	missense_variant	1	-	-	-	-	-	-	-	-	-	0.8284 (111/134)	-	-	-	-	-	-	-	-	-	-	-	-	-	-	-	-	-	-	-	-	-	-	-	-	-	-	-	-	-	-
17	12913880	T	G	Mrpl18	ENSMUST00000079121.3	c.361A>C	p.Asn121His	missense_variant	3	-	-	-	-	-	-	-	-	-	-	-	-	-	-	-	-	-	-	-	-	-	-	-	-	-	-	-	-	-	-	-	-	-	-	-	-	-	-	-	-
17	13097177	G	A	Tcp10b-Unc93a	ENSMUSG00000055602-ENSMUSG00000067049	n.13097177G>A		intergenic_region	1	-	-	-	-	-	-	-	-	-	-	-	-	-	-	-	-	-	-	-	-	-	-	-	-	-	-	-	-	-	-	-	-	-	-	-	-	-	-	-	-
17	14950546	C	CT	Phf10	ENSMUST00000024657.11	c.1110+13dupA		intron_variant	1	-	-	-	-	-	-	-	-	-	-	-	-	-	-	-	-	-	-	-	-	-	-	-	-	-	-	-	-	-	-	-	-	-	-	-	-	-	-	-	-
17	14950546	C	CT	1600012H06Rik	ENSMUSG00000050088	n.14950552dupT		intragenic_variant	1	-	-	-	-	-	-	-	-	-	-	-	-	-	-	-	-	-	-	-	-	-	-	-	-	-	-	-	-	-	-	-	-	-	-	-	-	-	-	-	-
17	15417605	C	T	Fam120b	ENSMUST00000055352.6	c.1825-28C>T		intron_variant	1	-	-	-	-	-	-	-	-	-	-	-	-	-	-	-	-	-	-	-	-	-	-	-	-	-	-	-	-	-	-	-	-	-	-	-	-	-	-	-	-
17	15504624	C	T	Tbp	ENSMUST00000014911.11	c.405C>T	p.Ser135Ser	synonymous_variant	2	-	-	-	-	-	-	-	-	-	-	-	-	-	-	-	-	-	-	-	-	-	-	-	-	-	-	-	-	-	-	-	-	-	-	-	-	-	-	-	-
17	18171206	AT	A	Vmn2r92	ENSMUST00000169686.1	c.1525-47delT		intron_variant	1	-	-	-	-	-	-	-	-	-	-	-	-	-	-	-	-	-	-	-	-	-	-	-	-	-	-	-	-	-	-	-	-	-	-	-	-	-	-	-	-
17	18185133	GA	G	Vmn2r92	ENSMUST00000169686.1	c.2548delA	p.Thr850fs	frameshift_variant	1	-	-	-	-	-	-	-	-	-	-	-	-	-	-	-	-	-	-	-	-	-	-	-	-	-	-	-	-	-	-	-	-	-	-	-	-	-	-	-	-
17	19065989	A	C	Vmn2r98	ENSMUST00000170424.1	c.748A>C	p.Thr250Pro	missense_variant	1	-	-	-	-	-	-	-	-	-	-	-	-	-	-	-	-	-	-	-	-	-	-	-	-	-	-	-	-	-	-	-	-	-	-	-	-	-	-	-	-
17	20624454	C	A	Fpr-rs3	ENSMUST00000071189.1	c.424G>T	p.Ala142Ser	missense_variant	1	-	-	-	-	-	-	-	-	-	-	-	-	-	-	-	-	-	-	-	-	-	-	-	-	-	-	-	-	-	-	-	-	-	-	-	-	-	0.4552 (66/145)	-	-
17	21933015	G	A	Zfp942	ENSMUST00000074295.7	c.8C>T	p.Ala3Val	missense_variant	5	-	-	-	-	-	-	-	-	-	-	-	-	-	-	-	-	-	-	-	-	-	-	-	-	-	-	-	-	-	-	-	-	-	-	-	-	0.3077 (4/13)	-	-	-
17	23345903	A	T	Vmn2r115	ENSMUST00000168175.1	c.763A>T	p.Lys255*	stop_gained	1	-	-	-	-	-	-	-	-	-	-	-	-	-	-	-	-	-	-	-	-	-	-	-	-	-	-	-	-	-	-	-	-	-	-	-	-	-	-	-	-
17	23811037	T	A	Srrm2	ENSMUST00000190686.6	c.696T>A	p.Pro232Pro	synonymous_variant	2	-	-	-	-	-	-	-	-	-	-	-	-	-	-	-	-	-	-	-	-	-	-	-	-	-	-	-	-	-	-	-	-	-	-	-	0.1746 (11/63)	-	-	-	-
17	23811697	G	T	Srrm2	ENSMUST00000190686.6	c.799G>T	p.Asp267Tyr	missense_variant	1	-	-	-	-	-	-	-	-	-	-	-	-	-	-	-	-	-	-	-	-	-	-	-	-	-	-	-	-	-	-	-	-	-	-	-	-	-	-	-	-
17	23881012	C	T	Dcpp1	ENSMUST00000068580.3	c.6C>T	p.Phe2Phe	synonymous_variant	2	-	-	-	-	-	-	-	-	-	-	-	-	-	-	-	-	-	-	-	-	-	-	-	-	-	-	-	-	-	-	-	-	-	-	-	-	-	-	-	-
17	23881012	C	T	Dcpp2	ENSMUSG00000096278	n.23881012C>T		intragenic_variant	2	-	-	-	-	-	-	-	-	-	-	-	-	-	-	-	-	-	-	-	-	-	-	-	-	-	-	-	-	-	-	-	-	-	-	-	-	-	-	-	-
17	23881031	G	C	Dcpp1	ENSMUST00000068580.3	c.25G>C	p.Ala9Pro	missense_variant	1	-	-	-	-	-	-	-	-	-	-	-	-	-	-	-	-	-	-	-	-	-	-	-	-	-	-	-	-	-	-	-	-	-	-	-	-	-	-	-	-
17	23881031	G	C	Dcpp2	ENSMUSG00000096278	n.23881031G>C		intragenic_variant	1	-	-	-	-	-	-	-	-	-	-	-	-	-	-	-	-	-	-	-	-	-	-	-	-	-	-	-	-	-	-	-	-	-	-	-	-	-	-	-	-
17	23900414	C	T	Dcpp2	ENSMUST00000088598.5	c.201C>T	p.Asn67Asn	synonymous_variant	1	-	-	-	-	-	-	-	-	-	-	-	-	-	-	-	-	-	-	-	-	-	-	-	-	-	-	-	-	-	-	-	-	-	-	-	-	-	-	-	-
17	23900444	C	T	Dcpp2	ENSMUST00000088598.5	c.231C>T	p.Ala77Ala	synonymous_variant	3	-	-	-	-	-	-	-	-	-	-	-	-	-	-	-	-	-	-	-	-	-	-	-	-	-	-	-	-	-	-	-	-	-	-	-	-	-	-	-	-
17	23919119	C	G	Dcpp3	ENSMUST00000115428.1	c.250C>G	p.Leu84Val	missense_variant	2	-	-	-	-	-	-	-	-	-	-	-	-	0.5833 (7/12)	-	-	-	-	-	-	-	-	-	-	-	-	-	-	-	-	-	-	-	-	-	-	-	-	-	-	-
17	24595234	C	T	Pkd1	ENSMUST00000035565.3	c.12577C>T	p.Arg4193Cys	missense_variant	2	-	-	-	-	-	-	-	-	-	-	-	-	-	-	-	-	-	-	-	-	-	-	-	-	-	-	-	-	-	-	-	-	-	-	-	-	-	-	-	-
17	24676605	C	T	Zfp598	ENSMUST00000047179.5	c.268C>T	p.Leu90Phe	missense_variant	1	-	-	-	0.4302 (37/86)	-	-	-	-	-	-	-	-	-	-	-	-	-	-	-	-	-	-	-	-	-	-	-	-	-	-	-	-	-	-	-	-	-	-	-	-
17	24703329	G	T	Tbl3	ENSMUST00000126319.7	c.1201C>A	p.Arg401Ser	missense_variant	1	-	-	-	-	-	-	-	-	-	-	-	-	-	-	-	-	-	-	-	-	-	-	-	-	-	-	-	-	-	0.125 (11/88)	-	-	-	-	-	-	-	-	-	-
17	25184574	G	T	BC003965	ENSMUST00000088307.3	c.-35G>T		5_prime_UTR_variant	1	-	-	-	-	-	-	-	-	-	-	-	-	-	-	-	-	-	-	-	-	-	-	-	-	-	-	-	-	-	-	-	-	-	-	-	-	-	-	-	-
17	25229283	T	C	Unkl	ENSMUST00000039734.11	c.1387T>C	p.Ser463Pro	missense_variant	1	-	-	-	-	-	-	-	-	-	-	-	-	-	-	-	-	-	-	-	-	-	-	-	-	-	-	-	-	-	-	-	-	-	-	-	-	-	-	-	-
17	25344836	C	T	Tpsab1	ENSMUST00000153118.1	c.419G>A	p.Ser140Asn	missense_variant	1	-	-	-	-	-	-	-	-	-	-	-	-	-	-	-	-	-	-	-	-	-	-	-	-	-	-	-	-	-	-	-	-	-	-	-	-	-	-	-	-
17	25722127	C	A	Chtf18	ENSMUST00000048054.13	c.1896G>T	p.Val632Val	synonymous_variant	1	-	-	-	-	-	-	-	-	-	-	-	-	-	-	-	-	-	-	-	-	-	-	-	-	-	-	-	-	-	-	-	-	-	-	-	-	-	-	-	-
17	25831996	A	G	Gm26694	ENSMUST00000180868.1	n.1888+35215A>G		intron_variant	1	-	-	-	-	-	-	-	-	-	-	-	-	-	-	-	-	-	-	-	-	-	-	-	-	-	-	-	-	-	-	-	-	-	-	-	-	-	-	-	-
17	25831996	A	G	Stub1	ENSMUST00000044911.8	c.362-35T>C		intron_variant	1	-	-	-	-	-	-	-	-	-	-	-	-	-	-	-	-	-	-	-	-	-	-	-	-	-	-	-	-	-	-	-	-	-	-	-	-	-	-	-	-
17	25960755	A	G	Capn15	ENSMUST00000212520.1	c.2630T>C	p.Val877Ala	missense_variant	1	-	-	-	-	-	-	-	-	-	-	-	-	-	-	-	-	-	-	-	-	-	-	-	-	-	-	-	-	-	-	-	-	-	-	-	-	-	-	-	-
17	25960755	A	G	Gm26694	ENSMUST00000180868.1	n.1889-4016A>G		intron_variant	1	-	-	-	-	-	-	-	-	-	-	-	-	-	-	-	-	-	-	-	-	-	-	-	-	-	-	-	-	-	-	-	-	-	-	-	-	-	-	-	-
17	25960755	A	G	D630044L22Rik	ENSMUST00000181174.1	c.73+581A>G		intron_variant	1	-	-	-	-	-	-	-	-	-	-	-	-	-	-	-	-	-	-	-	-	-	-	-	-	-	-	-	-	-	-	-	-	-	-	-	-	-	-	-	-
17	26084180	G	A	Decr2	ENSMUST00000040907.6	c.338-45C>T		intron_variant	1	-	-	-	-	-	-	-	-	-	-	-	-	-	-	-	-	-	-	-	-	-	-	-	-	-	-	-	-	-	-	-	-	-	-	-	-	-	-	-	-
17	26197941	G	C	Pdia2	ENSMUST00000039113.13	c.440C>G	p.Ala147Gly	missense_variant	1	-	-	-	-	-	-	-	-	-	-	-	-	-	-	-	-	-	-	-	-	-	-	-	-	-	-	-	-	-	-	-	-	-	-	-	-	-	-	-	-
17	26197941	G	C	Arhgdig	ENSMUSG00000073433	n.26197941C>G		intragenic_variant	1	-	-	-	-	-	-	-	-	-	-	-	-	-	-	-	-	-	-	-	-	-	-	-	-	-	-	-	-	-	-	-	-	-	-	-	-	-	-	-	-
17	26742392	T	A	Crebrf	ENSMUST00000142539.7	c.462T>A	p.Ser154Arg	missense_variant	1	-	-	-	-	-	-	-	-	-	-	-	-	-	-	-	-	-	-	-	-	-	-	-	-	-	-	-	-	-	-	-	-	-	-	-	-	-	-	-	-
17	26922712	C	CCCA	Kifc5b	ENSMUST00000078961.4	c.344_345insCCA	p.Ala115_Lys116insGln	disruptive_inframe_insertion	2	-	-	-	-	-	-	-	-	-	-	-	-	-	-	-	-	-	-	-	-	-	-	-	-	-	-	-	-	-	-	-	-	-	-	-	-	-	-	-	-
17	26936834	T	G	Phf1	ENSMUST00000073724.5	c.1282T>G	p.Phe428Val	missense_variant	3	-	-	-	-	-	-	-	-	-	-	-	-	-	-	-	-	-	-	-	-	-	-	-	-	-	-	-	-	-	-	-	-	-	-	-	-	-	-	-	-
17	27199428	G	T	Lemd2	ENSMUST00000055117.7	c.812C>A	p.Ala271Asp	missense_variant	1	-	-	-	-	-	-	-	-	-	-	-	-	-	-	-	-	-	-	-	-	-	-	-	-	-	-	-	-	-	-	0.1481 (8/54)	-	-	-	-	-	-	-	-	-
17	28818424	C	A	Brpf3	ENSMUST00000004985.9	c.2265C>A	p.Ser755Arg	missense_variant	1	-	-	-	-	-	-	-	-	-	-	-	-	-	-	-	-	-	-	-	-	-	-	-	-	-	-	-	-	-	-	-	-	-	-	-	-	-	-	-	-
17	28836586	C	T	Brpf3	ENSMUST00000004985.9	c.3508C>T	p.Arg1170Cys	missense_variant	2	-	-	-	-	-	-	-	-	-	-	-	-	-	-	-	-	-	-	-	-	-	-	-	-	-	-	-	-	-	-	-	-	-	-	-	-	-	-	-	-
17	30807269	G	A	Dnah8	ENSMUST00000170651.1	c.12144G>A	p.Thr4048Thr	synonymous_variant	1	-	-	-	-	-	-	-	-	-	-	-	-	-	-	-	-	-	-	-	-	-	-	-	-	-	-	-	-	-	-	-	-	-	-	-	0.2222 (38/171)	-	-	-	-
17	30851700	T	G	Dnah8	ENSMUST00000170651.1	c.13359T>G	p.Gly4453Gly	synonymous_variant	1	-	-	-	-	-	-	-	-	-	-	-	-	-	-	-	-	-	-	-	-	-	-	-	-	-	-	-	-	-	-	-	-	-	-	-	-	-	-	-	-
17	31652472	T	TA	U2af1	ENSMUST00000014684.4	c.133-761dupT		intron_variant	1	-	-	-	-	-	-	-	-	-	-	-	-	-	-	-	-	-	-	-	-	-	-	-	-	-	-	-	-	-	-	-	-	-	-	-	-	-	-	-	-
17	31851520	G	A	Sik1	ENSMUST00000024839.4	c.337+13C>T		intron_variant	1	-	-	-	-	-	-	-	-	-	-	-	-	0.2262 (50/221)	-	-	-	-	-	-	-	-	-	-	-	-	-	-	-	-	-	-	-	-	-	-	-	-	-	-	-
17	31851550	T	G	Sik1	ENSMUST00000024839.4	c.320A>C	p.Lys107Thr	missense_variant	1	-	-	-	-	-	-	-	-	-	-	-	-	-	-	-	-	-	-	-	-	-	-	-	-	-	-	-	-	-	-	-	-	-	-	-	-	-	-	-	-
17	32820812	G	GT	Zfp799	ENSMUST00000202988.3	c.478dupA	p.Thr160fs	frameshift_variant	1	-	-	-	-	-	-	-	-	-	-	-	-	-	-	-	-	-	-	-	-	-	-	-	-	-	-	-	-	-	-	-	-	-	-	-	-	-	-	-	-
17	32820812	G	GT	Gm26693	ENSMUST00000181318.1	n.298-156dupT		intron_variant	1	-	-	-	-	-	-	-	-	-	-	-	-	-	-	-	-	-	-	-	-	-	-	-	-	-	-	-	-	-	-	-	-	-	-	-	-	-	-	-	-
17	33242569	G	T	Zfp955a	ENSMUST00000008830.8	c.588C>A	p.His196Gln	missense_variant	1	-	-	-	-	-	-	-	-	-	-	-	-	-	-	-	-	-	-	-	-	-	-	-	-	-	-	-	-	-	-	-	-	-	-	-	-	-	-	-	-
17	33302147	A	G	Zfp955b	ENSMUST00000099414.3	c.589A>G	p.Thr197Ala	missense_variant	1	-	-	-	-	-	-	-	-	-	-	-	-	-	-	-	-	-	-	-	-	-	-	-	-	-	-	-	-	-	-	-	-	-	-	-	-	-	-	-	-
17	33544979	T	G	Adamts10	ENSMUST00000087623.12	c.1822T>G	p.Phe608Val	missense_variant	3	-	-	-	-	-	-	-	-	-	-	-	-	-	-	-	-	-	-	-	-	-	-	-	-	-	-	-	-	-	-	-	-	-	-	-	-	-	-	-	-
17	33918694	T	C	Zbtb22	ENSMUST00000053429.9	c.1812T>C	p.Asp604Asp	synonymous_variant	2	0.1846 (12/65)	-	-	-	-	-	-	-	-	-	-	-	-	-	-	-	-	-	-	-	-	-	-	-	-	-	-	-	-	-	-	-	0.3113 (33/106)	-	-	-	-	-	-	-
17	33918694	T	C	Tapbp	ENSMUSG00000024308	n.33918694T>C		intragenic_variant	2	0.1846 (12/65)	-	-	-	-	-	-	-	-	-	-	-	-	-	-	-	-	-	-	-	-	-	-	-	-	-	-	-	-	-	-	-	0.3113 (33/106)	-	-	-	-	-	-	-
17	33949263	C	T	Wdr46	ENSMUST00000025170.9	c.1732-15C>T		intron_variant	1	-	-	-	-	-	-	-	-	-	-	-	-	-	-	-	-	-	-	-	-	-	-	-	-	-	-	-	-	-	-	-	-	-	-	-	-	-	-	-	-
17	33956928	AG	A	Vps52	ENSMUST00000025178.15	c.98delG	p.Gly33fs	frameshift_variant	1	-	-	-	-	-	-	-	-	-	-	-	-	0.1379 (4/29)	-	-	-	-	-	-	-	-	-	-	-	-	-	-	-	-	-	-	-	-	-	-	-	-	-	-	-
17	34052304	T	C	Col11a2	ENSMUST00000114255.7	c.1633-8T>C		splice_region_variant&intron_variant	1	-	-	-	-	-	-	-	-	-	-	-	-	-	-	-	-	-	-	-	-	-	-	-	-	-	-	-	-	-	-	-	-	-	-	0.2 (6/30)	-	-	-	-	-
17	34052311	G	GG	Col11a2	ENSMUST00000114255.7	c.1634dupG	p.Asp546fs	frameshift_variant&splice_region_variant	1	-	-	-	-	-	-	-	-	-	-	-	-	-	-	-	-	-	-	-	-	-	-	-	-	-	-	-	-	-	-	-	-	-	-	0.1538 (6/39)	-	-	-	-	-
17	34474209	T	C	Btnl4	ENSMUST00000065841.4	c.231A>G	p.Val77Val	synonymous_variant	1	-	-	-	-	-	-	-	-	-	-	-	-	-	-	-	-	-	-	-	-	-	-	-	-	-	-	-	-	-	-	-	-	-	-	-	-	-	-	-	-
17	34583678	A	G	Notch4	ENSMUST00000015612.13	c.4072A>G	p.Arg1358Gly	missense_variant	1	-	-	-	-	-	-	-	-	-	-	-	-	-	-	-	-	-	-	-	-	-	-	-	-	-	-	-	-	-	-	-	-	-	-	-	-	-	-	-	-
17	34672069	A	G	Tnxb	ENSMUST00000087399.4	c.1385A>G	p.Asn462Ser	missense_variant	1	-	-	-	-	-	-	-	-	-	-	-	-	-	-	-	-	-	-	-	-	-	-	-	-	-	-	-	-	-	-	-	-	-	-	-	-	-	-	-	-
17	34672522	G	A	Tnxb	ENSMUST00000087399.4	c.1838G>A	p.Arg613His	missense_variant	1	-	-	-	-	-	-	-	-	-	-	-	-	-	-	-	-	-	-	-	-	-	-	-	-	-	-	-	-	-	-	-	-	-	-	-	-	-	-	-	-
17	34682229	C	T	Tnxb	ENSMUST00000087399.4	c.3016C>T	p.Pro1006Ser	missense_variant	1	-	-	-	-	-	-	-	-	-	-	-	-	-	-	-	-	-	-	-	-	-	-	-	-	-	-	-	-	-	-	-	-	-	-	-	-	-	-	-	-
17	34970162	G	A	Gm20481	ENSMUST00000173680.1	c.147G>A	p.Leu49Leu	synonymous_variant	1	-	-	-	-	-	-	-	-	-	-	-	-	-	-	-	-	-	-	-	-	-	-	-	-	-	-	-	-	-	-	-	-	-	-	-	-	-	-	-	-
17	34970162	G	A	Hspa1a	ENSMUST00000087328.3	c.1764C>T	p.Asp588Asp	synonymous_variant	1	-	-	-	-	-	-	-	-	-	-	-	-	-	-	-	-	-	-	-	-	-	-	-	-	-	-	-	-	-	-	-	-	-	-	-	-	-	-	-	-
17	34970510	T	C	Hspa1a	ENSMUST00000087328.3	c.1416A>G	p.Pro472Pro	synonymous_variant	1	-	-	-	-	-	-	-	-	-	-	-	-	-	-	-	-	-	-	-	-	-	-	-	-	-	-	-	-	-	-	-	-	-	-	-	-	0.1212 (4/33)	-	-	-
17	34970510	T	C	Gm20481	ENSMUST00000173680.1	c.273+222T>C		intron_variant	1	-	-	-	-	-	-	-	-	-	-	-	-	-	-	-	-	-	-	-	-	-	-	-	-	-	-	-	-	-	-	-	-	-	-	-	-	0.1212 (4/33)	-	-	-
17	34978347	A	C	Hspa1l	ENSMUST00000007248.4	c.1361A>C	p.Asp454Ala	missense_variant	1	-	-	-	-	-	-	-	-	-	-	-	-	-	-	-	-	-	-	-	-	-	-	-	-	-	-	-	-	-	-	-	-	-	-	-	-	-	-	-	-
17	34978347	A	C	Gm10501	ENSMUST00000151136.1	n.752T>G		non_coding_transcript_exon_variant	1	-	-	-	-	-	-	-	-	-	-	-	-	-	-	-	-	-	-	-	-	-	-	-	-	-	-	-	-	-	-	-	-	-	-	-	-	-	-	-	-
17	35873851	CGAG	C	Ppp1r18	ENSMUST00000127442.7	c.1698_1700delGGA	p.Glu567del	disruptive_inframe_deletion	1	-	-	-	-	-	-	-	-	-	-	-	-	-	-	-	-	-	-	-	-	-	-	-	-	-	-	-	-	-	-	-	-	-	-	-	-	-	-	-	-
17	35892471	A	C	Dhx16	ENSMUST00000025292.14	c.3059A>C	p.Lys1020Thr	missense_variant	1	-	-	-	-	-	-	-	-	-	0.3398 (35/103)	-	-	-	-	-	-	-	-	-	-	-	-	-	-	-	-	-	-	-	-	-	-	-	-	-	-	-	-	-	-
17	36857039	T	C	Trim26	ENSMUST00000053434.14	c.955+18T>C		intron_variant	1	-	-	-	-	-	-	-	-	-	-	-	-	-	-	-	-	-	-	-	-	-	-	-	-	-	-	-	-	-	-	-	-	-	-	-	-	-	-	-	-
17	37067368	A	C	Gabbr1	ENSMUST00000025338.15	c.1856+4A>C		splice_region_variant&intron_variant	1	-	-	-	-	-	-	-	-	-	-	-	-	-	-	-	-	-	-	-	-	-	-	-	-	-	-	-	-	-	-	-	-	-	-	-	-	-	-	-	-
17	37197377	G	A	Olfr94	ENSMUST00000055324.7	c.590C>T	p.Ala197Val	missense_variant	1	-	-	-	-	-	-	-	-	-	-	-	-	-	-	-	-	-	-	-	-	-	-	-	-	-	-	-	-	-	-	-	-	-	-	-	-	-	-	-	-
17	37672791	T	A	Olfr118	ENSMUST00000122036.1	c.767T>A	p.Leu256Gln	missense_variant	1	0.1643 (47/286)	-	-	-	-	-	-	-	-	-	-	-	-	-	-	-	-	-	-	-	-	-	-	-	-	-	-	-	-	-	-	-	-	-	-	-	-	-	-	-
17	37903694	A	T	Olfr127	ENSMUST00000076331.2	c.147A>T	p.Thr49Thr	synonymous_variant	1	-	-	-	-	-	-	-	-	-	-	-	-	-	-	-	-	-	-	-	-	-	-	-	-	-	-	-	-	-	-	-	-	-	-	-	-	-	-	-	-
17	38130835	G	A	Olfr132	ENSMUST00000087128.1	c.356C>T	p.Ala119Val	missense_variant	1	-	-	-	-	-	-	-	-	-	-	-	-	-	-	-	-	-	-	-	-	-	-	-	-	-	-	-	-	-	-	-	-	-	-	-	-	-	-	-	-
17	38274969	T	C	Olfr138	ENSMUST00000071871.4	c.197T>C	p.Leu66Pro	missense_variant	1	-	-	-	-	-	-	-	-	-	-	-	-	-	-	-	-	-	-	-	-	-	-	-	-	-	-	-	-	-	-	-	-	-	-	-	-	-	-	-	-
17	43502458	G	GA	Mep1a	ENSMUST00000024707.8	c.131-21dupT		intron_variant	3	-	-	-	-	-	-	-	-	-	-	-	-	0.1905 (4/21)	-	-	-	-	-	-	-	-	-	-	-	-	-	-	-	-	-	-	-	-	-	-	-	-	-	-	-
17	43502458	GA	G	Mep1a	ENSMUST00000024707.8	c.131-21delT		intron_variant	1	-	-	-	-	-	-	-	-	-	-	-	-	-	-	-	-	-	-	-	-	-	-	-	-	-	-	-	-	-	-	-	-	-	-	-	-	-	-	-	-
17	43627294	A	C	Tdrd6	ENSMUST00000168073.7	c.2862T>G	p.Arg954Arg	synonymous_variant	1	-	-	-	-	-	-	-	-	-	-	-	-	-	-	-	-	-	-	-	-	-	-	-	-	-	-	-	-	-	-	-	-	-	-	-	-	-	-	-	-
17	43746605	C	A	Cyp39a1	ENSMUST00000170988.1	c.1334C>A	p.Pro445Gln	missense_variant	1	-	-	-	-	-	-	-	-	-	-	-	-	-	-	-	-	-	-	-	-	-	-	-	-	-	-	-	-	-	-	-	-	-	-	-	-	-	-	-	-
17	44610077	G	A	Runx2	ENSMUST00000160673.7	c.1263C>T	p.Thr421Thr	synonymous_variant	1	-	-	-	-	-	-	-	-	-	-	-	-	-	-	-	-	-	-	-	-	-	-	-	-	-	-	-	-	-	-	-	-	-	-	-	-	-	-	-	-
17	46322117	T	G	Abcc10	ENSMUST00000047970.13	c.1768+20A>C		intron_variant	1	-	-	-	-	-	-	-	-	-	-	-	-	-	-	-	-	-	-	-	-	-	-	-	-	-	-	-	-	-	-	-	-	-	-	-	-	-	-	-	-
17	46409760	G	C	Zfp318	ENSMUST00000113481.7	c.3423G>C	p.Lys1141Asn	missense_variant	1	-	-	-	-	-	-	-	-	-	-	-	-	-	-	-	-	-	-	-	-	-	-	-	-	-	-	-	-	-	-	-	-	-	-	-	-	-	-	-	-
17	46433023	C	T	Slc22a7	ENSMUST00000087012.5	c.1510G>A	p.Ala504Thr	missense_variant	1	-	-	0.1264 (11/87)	-	-	-	-	-	-	-	-	-	-	-	-	-	-	-	-	-	-	-	-	-	-	-	-	-	-	-	-	-	-	-	-	-	-	-	-	-
17	46657040	G	A	Cul7	ENSMUST00000043464.13	c.2153G>A	p.Ser718Asn	missense_variant	1	-	-	-	-	-	-	-	-	-	-	-	-	-	-	-	-	-	-	-	-	-	-	-	-	-	-	-	-	-	-	-	-	-	-	-	-	-	-	-	-
17	46657040	G	A	Gm26904	ENSMUST00000181301.1	n.70+57088G>A		intron_variant	1	-	-	-	-	-	-	-	-	-	-	-	-	-	-	-	-	-	-	-	-	-	-	-	-	-	-	-	-	-	-	-	-	-	-	-	-	-	-	-	-
17	46944513	A	C	Ubr2	ENSMUST00000113335.2	c.4246T>G	p.Leu1416Val	missense_variant	2	-	-	-	-	-	-	-	-	-	-	-	-	-	-	-	-	-	-	-	-	-	-	-	-	-	-	-	-	-	-	-	-	-	-	-	-	-	-	-	-
17	47868749	C	T	Foxp4	ENSMUST00000097311.8	c.1965G>A	p.Pro655Pro	synonymous_variant	1	-	-	-	-	-	-	-	-	-	-	-	-	-	-	-	-	-	-	-	-	-	-	-	-	-	-	-	-	-	-	-	-	-	-	-	-	-	-	-	-
17	50004280	C	G	Rftn1	ENSMUST00000044503.13	c.1230G>C	p.Leu410Leu	synonymous_variant	1	-	-	-	-	-	-	-	-	-	0.1358 (33/243)	-	-	-	-	-	-	-	-	-	-	-	-	-	-	-	-	-	-	-	-	-	-	-	-	-	-	-	-	-	-
17	50240337	T	A	AY702103	ENSMUST00000180996.1	n.1130T>A		non_coding_transcript_exon_variant	1	-	-	-	-	-	-	-	-	-	-	-	-	-	-	-	-	-	-	-	-	-	-	-	-	-	-	-	-	-	-	-	-	-	-	-	-	-	-	-	-
17	53401582	T	G	Efhb	ENSMUST00000024725.4	c.2059A>C	p.Ile687Leu	missense_variant	2	-	-	-	-	-	-	-	-	-	-	-	-	-	-	-	-	-	-	-	-	-	-	-	-	-	-	-	-	-	-	-	-	-	-	-	-	-	-	-	-
17	56057769	C	T	Chaf1a	ENSMUST00000002914.8	c.1012C>T	p.Arg338*	stop_gained	1	-	-	-	-	-	-	-	-	-	-	-	-	-	-	-	-	-	-	-	-	-	-	-	-	-	-	-	-	-	-	-	-	-	-	-	-	-	-	-	-
17	57071861	A	C	Dennd1c	ENSMUST00000011623.7	c.854T>G	p.Val285Gly	missense_variant	1	-	-	-	-	-	-	-	-	-	-	-	-	-	-	-	-	-	-	-	-	-	-	-	-	-	-	-	-	-	-	-	-	-	-	-	-	-	-	-	-
17	66438234	C	A	Mtcl1	ENSMUST00000086693.11	c.1187G>T	p.Ser396Ile	missense_variant	1	-	-	-	-	-	-	-	-	-	-	-	-	-	-	-	-	-	-	-	-	-	-	-	-	-	-	-	-	-	-	-	-	-	-	-	-	-	-	-	-
17	71985444	G	C	Alk	ENSMUST00000086639.4	c.1538C>G	p.Ala513Gly	missense_variant	1	-	-	-	-	-	-	-	-	-	-	-	-	-	-	-	-	-	-	-	-	-	-	-	-	-	-	-	-	-	-	-	-	-	-	-	-	-	-	-	-
17	72939362	G	A	Lbh	ENSMUST00000024857.12	c.236G>A	p.Arg79Gln	missense_variant	2	-	-	-	-	-	-	-	-	-	-	-	-	-	-	-	-	-	-	-	-	-	-	-	-	-	-	-	-	-	-	-	-	-	-	-	-	-	-	-	-
17	74655136	TA	T	Birc6	ENSMUST00000182597.7	c.11825-24delA		intron_variant	1	-	-	-	-	-	-	-	-	-	-	-	-	-	-	-	-	-	-	-	-	-	-	-	-	-	-	-	-	-	-	-	-	-	-	-	-	-	-	-	-
17	74863417	G	A	Ttc27	ENSMUST00000024882.6	c.2505G>A	p.Glu835Glu	synonymous_variant	1	-	-	-	-	-	-	-	-	-	-	-	-	-	-	-	-	-	-	-	-	-	-	-	-	-	-	-	-	-	-	-	-	-	-	-	-	-	-	-	-
17	78370173	C	A	Crim1	ENSMUST00000112498.2	c.2746+56C>A		intron_variant	1	-	-	-	-	-	-	-	-	-	-	-	-	-	-	-	-	-	-	-	-	-	-	-	-	-	-	-	-	-	-	-	-	-	-	-	-	-	-	-	-
17	78491656	A	G	Gm10093	ENSMUST00000079363.4	c.75A>G	p.Gly25Gly	synonymous_variant	1	-	-	-	-	-	-	-	-	-	-	-	-	-	-	-	-	-	-	-	-	-	-	-	-	-	-	-	-	-	-	-	-	-	-	-	-	-	-	-	-
17	79667936	A	AT	Rmdn2	ENSMUST00000040368.2	c.868-5dupT		splice_region_variant&intron_variant	1	-	-	-	-	-	-	-	-	-	-	-	-	0.1176 (4/34)	-	-	-	-	-	-	-	-	-	-	-	-	-	-	-	-	-	-	-	-	-	-	-	-	-	-	-
17	83441394	A	C	Eml4	ENSMUST00000096766.10	c.923A>C	p.Tyr308Ser	missense_variant	1	-	-	-	-	-	-	-	-	-	-	0.6053 (23/38)	-	-	-	-	-	-	-	-	-	-	-	-	-	-	-	-	-	-	-	-	-	-	-	-	-	-	-	-	-
17	83755697	A	G	Mta3	ENSMUST00000067826.14	c.499+21A>G		intron_variant	1	-	-	-	-	-	-	-	-	-	-	-	-	-	-	-	-	-	-	-	-	-	-	-	-	-	-	-	-	-	-	-	-	-	-	-	-	-	-	-	-
17	86994534	T	TCC	Rhoq	ENSMUST00000024956.14	c.202-23_202-22dupCC		intron_variant	1	-	-	-	-	-	-	-	-	-	-	-	-	-	-	-	-	-	-	-	-	-	-	-	-	-	-	-	-	-	-	-	-	-	-	-	-	-	-	-	-
17	87649659	G	A	Epcam	ENSMUST00000053577.8	c.906+1G>A		splice_donor_variant&intron_variant	1	-	-	-	-	-	-	-	-	-	-	-	-	-	-	-	-	-	-	-	-	-	-	-	-	-	-	-	-	-	-	-	-	-	-	-	-	0.5217 (12/23)	-	-	-
17	90643187	A	C	Nrxn1	ENSMUST00000161402.9	c.1584T>G	p.His528Gln	missense_variant	1	-	-	-	-	-	-	-	-	-	-	-	-	-	-	-	-	-	-	-	-	-	-	-	-	-	-	-	-	-	-	-	-	-	-	-	-	-	-	-	-
17	91089058	T	C	Gm10308	ENSMUST00000095183.1	c.407T>C	p.Phe136Ser	missense_variant	1	-	-	-	-	-	-	-	-	-	-	-	-	-	-	-	-	-	-	-	-	-	-	-	-	-	-	-	-	-	-	-	-	-	-	-	-	-	-	-	-
17	91089058	T	C	Nrxn1	ENSMUSG00000024109	n.91089058A>G		intragenic_variant	1	-	-	-	-	-	-	-	-	-	-	-	-	-	-	-	-	-	-	-	-	-	-	-	-	-	-	-	-	-	-	-	-	-	-	-	-	-	-	-	-
17	94735434	T	A	Mettl4	ENSMUST00000171284.1	c.973A>T	p.Thr325Ser	missense_variant	1	-	-	-	-	-	-	-	-	-	-	-	-	-	-	-	-	-	-	-	-	-	-	-	-	-	-	-	-	-	-	-	-	-	-	-	-	-	-	-	-
17	94748015	C	CA	Mettl4	ENSMUST00000171284.1	c.-7dupT		5_prime_UTR_variant	1	-	-	-	-	-	-	-	-	-	-	-	-	-	-	-	-	-	-	-	-	-	-	-	-	-	-	-	-	-	-	-	-	-	-	-	-	-	-	-	-
18	6784745	G	A	Rab18	ENSMUST00000097680.5	c.378+57G>A		intron_variant	1	-	-	-	-	-	-	-	-	-	-	-	-	-	-	-	-	-	-	-	-	-	-	-	-	-	-	-	-	-	-	-	-	-	-	-	-	-	-	-	-
18	10751972	G	A	Mib1	ENSMUST00000052838.10	c.853G>A	p.Val285Ile	missense_variant	2	-	-	-	-	-	-	-	-	-	-	-	-	-	-	-	-	-	-	-	-	-	-	-	-	-	-	-	-	-	-	-	-	-	-	-	-	-	-	-	-
18	10775593	T	C	Mib1	ENSMUST00000052838.10	c.1544T>C	p.Val515Ala	missense_variant	2	-	-	-	-	-	-	-	-	-	-	-	-	-	-	-	-	0.2083 (5/24)	-	-	-	-	-	-	-	-	-	-	-	-	-	-	-	-	-	-	-	-	-	-	-
18	10795889	C	T	Mib1	ENSMUST00000052838.10	c.2211+38C>T		intron_variant	2	-	-	-	-	-	-	-	-	-	-	-	-	0.1579 (6/38)	-	-	-	-	-	-	-	-	-	-	-	-	-	-	-	-	-	-	-	-	-	-	-	-	-	-	-
18	12197310	G	C	Npc1	ENSMUST00000025279.5	c.2796-13C>G		intron_variant	1	-	-	-	-	-	-	-	-	-	-	-	-	-	-	-	-	-	-	-	-	-	-	-	-	-	-	-	-	-	-	-	-	-	-	-	-	-	-	-	-
18	12197310	G	C	Gm15956	ENSMUST00000153352.1	n.86-949G>C		intron_variant	1	-	-	-	-	-	-	-	-	-	-	-	-	-	-	-	-	-	-	-	-	-	-	-	-	-	-	-	-	-	-	-	-	-	-	-	-	-	-	-	-
18	12419155	TC	T	Lama3	ENSMUST00000092070.12	c.1174-9delC		intron_variant	1	-	-	-	-	-	-	-	-	-	-	-	-	-	-	-	-	-	-	-	-	-	-	-	-	-	-	-	-	-	-	-	-	-	-	-	-	-	-	-	-
18	12553177	G	A	Lama3	ENSMUST00000092070.12	c.8296G>A	p.Ala2766Thr	missense_variant	1	-	-	-	-	-	-	-	-	-	-	-	-	-	-	-	-	-	-	-	-	-	-	-	-	-	-	-	-	-	-	-	-	-	-	-	-	-	-	-	-
18	12687015	G	T	Ttc39c	ENSMUST00000025294.7	c.271G>T	p.Glu91*	stop_gained	1	-	-	-	-	-	-	-	-	-	-	-	-	-	-	-	-	-	-	-	-	-	-	-	-	-	-	-	-	-	-	-	-	-	-	-	-	-	-	-	-
18	16601649	A	G	Cdh2	ENSMUST00000025166.13	c.2487T>C	p.Pro829Pro	synonymous_variant	1	-	-	-	-	-	-	-	-	-	-	-	-	-	-	0.2 (4/20)	-	-	-	-	-	-	-	-	-	-	-	-	-	-	-	-	-	-	-	-	-	-	-	-	-
18	20331589	C	G	Dsg1a	ENSMUST00000077146.3	c.1140C>G	p.Ile380Met	missense_variant	1	-	-	-	-	-	-	-	-	-	-	-	-	-	-	-	-	-	-	-	-	-	-	-	-	-	-	-	-	-	-	-	-	-	-	-	-	-	-	-	-
18	20870625	G	A	Trappc8	ENSMUST00000025177.12	c.745C>T	p.Leu249Phe	missense_variant	1	-	-	-	-	-	-	-	-	-	-	-	-	-	-	-	-	-	-	-	-	-	-	-	-	0.2041 (20/98)	-	-	-	-	-	-	-	-	-	-	-	-	-	-	-
18	23965315	A	G	Zfp397-Zscan30	ENSMUSG00000024276-ENSMUSG00000024274	n.23965315A>G		intergenic_region	1	-	-	-	-	-	-	-	-	-	-	-	-	-	-	-	-	-	-	-	-	-	-	-	-	-	-	-	-	-	-	-	-	-	-	-	-	-	-	-	-
18	23965353	A	G	Zfp397-Zscan30	ENSMUSG00000024276-ENSMUSG00000024274	n.23965353A>G		intergenic_region	1	-	-	-	-	-	-	-	-	-	-	-	-	-	-	-	-	-	-	-	-	-	-	-	-	-	-	-	-	-	-	-	-	-	-	-	-	-	-	-	-
18	23965399	A	G	Zfp397-Zscan30	ENSMUSG00000024276-ENSMUSG00000024274	n.23965399A>G		intergenic_region	1	-	-	-	-	-	-	-	-	-	-	-	-	-	-	-	-	-	-	-	-	-	-	-	-	-	-	-	-	-	-	-	-	-	-	-	-	-	-	-	-
18	31711393	A	G	Sap130	ENSMUST00000178164.7	c.2618A>G	p.Lys873Arg	missense_variant	1	-	-	-	-	-	-	-	-	-	-	-	-	-	-	-	-	-	-	-	-	-	-	-	-	-	-	-	-	-	-	-	-	-	-	0.1277 (6/47)	-	-	-	-	-
18	32097176	C	T	Iws1	ENSMUST00000025243.4	c.2196C>T	p.Ile732Ile	synonymous_variant	2	-	-	-	-	-	-	-	-	-	-	-	-	-	-	-	-	-	-	-	-	-	-	-	-	-	-	-	-	-	-	-	-	-	-	-	-	-	0.4737 (36/76)	-	-
18	32220522	A	C	Map3k2	ENSMUST00000096575.3	c.1344A>C	p.Gln448His	missense_variant	1	-	-	-	-	-	-	-	-	-	0.3333 (8/24)	-	-	-	-	-	-	-	-	-	-	-	-	-	-	-	-	-	-	-	-	-	-	-	-	-	-	-	-	-	-
18	32424840	G	A	Bin1	ENSMUST00000025239.7	c.878G>A	p.Gly293Glu	missense_variant	1	-	-	-	0.4127 (26/63)	-	-	-	-	-	-	-	-	-	-	-	-	-	-	-	-	-	-	-	-	-	-	-	-	-	-	-	-	-	-	-	-	-	-	-	-
18	33462056	A	G	Nrep	ENSMUST00000051087.14	c.-33T>C		5_prime_UTR_variant	2	-	-	-	-	-	-	-	-	-	-	-	-	-	-	-	-	-	0.1759 (38/216)	-	-	-	-	-	-	-	-	0.177 (43/243)	-	-	-	-	-	-	-	-	-	-	-	-	-
18	34314763	GAAATATTAGAAGAATGTATTATTTCAGCCATGCC	G	Apc	ENSMUST00000079362.11	c.4714_4747delATATTAGAAGAATGTATTATTTCAGCCATGCCAA	p.Ile1572fs	frameshift_variant	1	-	-	-	-	-	-	-	-	-	-	-	-	-	-	-	-	-	-	-	-	-	-	-	-	-	-	-	-	-	-	-	-	-	-	-	0.1852 (5/27)	-	-	-	-
18	34316585	C	CA	Apc	ENSMUST00000079362.11	c.6541dupA	p.Ile2181fs	frameshift_variant	4	-	-	-	-	-	-	-	-	-	-	-	-	-	-	-	-	-	-	-	-	-	-	-	-	-	-	-	-	-	-	-	-	-	-	-	-	-	-	-	-
18	34644046	A	C	Cdc23	ENSMUST00000133181.1	c.500T>G	p.Leu167Arg	missense_variant	1	-	-	-	-	-	-	-	-	-	0.3857 (27/70)	-	-	-	-	-	-	-	-	-	-	-	-	-	-	-	-	-	-	-	-	-	-	-	-	-	-	-	-	-	-
18	34808225	A	T	Kdm3b	ENSMUST00000043775.7	c.1384-16A>T		intron_variant	1	-	-	-	-	-	-	-	-	-	-	-	-	-	-	-	-	-	-	-	-	-	-	-	-	-	-	-	-	-	-	-	0.519 (41/79)	-	-	-	-	-	-	-	-
18	34861345	C	G	Egr1	ENSMUST00000064795.5	c.-144C>G		5_prime_UTR_variant	2	-	-	-	-	-	-	-	-	-	-	-	-	-	-	-	-	-	-	-	-	-	-	-	-	-	-	-	-	-	-	-	-	-	-	-	-	-	-	-	-
18	35624117	T	G	Slc23a1	ENSMUST00000025212.5	c.900A>C	p.Arg300Arg	synonymous_variant	1	-	-	-	-	-	-	-	-	-	-	-	-	-	-	-	-	-	-	-	-	-	-	-	-	-	-	-	-	-	-	-	-	-	-	-	-	-	-	-	-
18	36632454	C	CA	Ankhd1	ENSMUST00000155329.8	c.3270dupA	p.Gly1091fs	frameshift_variant&splice_region_variant	11	-	-	-	-	0.1143 (4/35)	-	-	-	-	-	-	-	-	-	-	-	-	-	-	-	-	-	-	-	-	-	-	-	-	-	0.129 (4/31)	-	-	-	-	-	-	-	-	0.1667 (4/24)
18	36632454	C	CAA	Ankhd1	ENSMUST00000155329.8	c.3269_3270dupAA	p.Gly1091fs	frameshift_variant&splice_region_variant	1	-	-	-	-	-	-	-	-	-	-	-	-	-	-	-	-	-	-	-	-	-	-	-	-	-	-	-	-	-	-	-	-	-	-	-	-	-	-	-	-
18	36676454	T	C	Sra1	ENSMUST00000001415.7	c.656A>G	p.Asp219Gly	missense_variant	1	-	-	-	-	-	-	-	-	-	0.303 (10/33)	-	-	-	-	-	-	-	-	-	-	-	-	-	-	-	-	-	-	-	-	-	-	-	-	-	-	-	-	-	-
18	36974514	G	C	Pcdha7	ENSMUST00000192631.1	c.591G>C	p.Arg197Arg	synonymous_variant	1	-	-	-	-	-	-	-	-	-	-	-	-	-	-	-	-	-	-	-	-	-	-	-	-	-	-	-	-	-	-	-	-	-	-	-	0.1333 (24/180)	-	-	-	-
18	36974514	G	C	Pcdha1	ENSMUST00000070797.6	c.2388+41842G>C		intron_variant	1	-	-	-	-	-	-	-	-	-	-	-	-	-	-	-	-	-	-	-	-	-	-	-	-	-	-	-	-	-	-	-	-	-	-	-	0.1333 (24/180)	-	-	-	-
18	36974514	G	C	Pcdha2	ENSMUST00000115662.8	c.2388+32809G>C		intron_variant	1	-	-	-	-	-	-	-	-	-	-	-	-	-	-	-	-	-	-	-	-	-	-	-	-	-	-	-	-	-	-	-	-	-	-	-	0.1333 (24/180)	-	-	-	-
18	36974514	G	C	Pcdha3	ENSMUST00000192503.1	c.2370+25938G>C		intron_variant	1	-	-	-	-	-	-	-	-	-	-	-	-	-	-	-	-	-	-	-	-	-	-	-	-	-	-	-	-	-	-	-	-	-	-	-	0.1333 (24/180)	-	-	-	-
18	36974514	G	C	Pcdha4	ENSMUST00000192512.5	c.2385+19364G>C		intron_variant	1	-	-	-	-	-	-	-	-	-	-	-	-	-	-	-	-	-	-	-	-	-	-	-	-	-	-	-	-	-	-	-	-	-	-	-	0.1333 (24/180)	-	-	-	-
18	36974514	G	C	Pcdha5	ENSMUST00000192168.1	c.2346+11729G>C		intron_variant	1	-	-	-	-	-	-	-	-	-	-	-	-	-	-	-	-	-	-	-	-	-	-	-	-	-	-	-	-	-	-	-	-	-	-	-	0.1333 (24/180)	-	-	-	-
18	36974514	G	C	Pcdha6	ENSMUST00000193777.5	c.2382+4377G>C		intron_variant	1	-	-	-	-	-	-	-	-	-	-	-	-	-	-	-	-	-	-	-	-	-	-	-	-	-	-	-	-	-	-	-	-	-	-	-	0.1333 (24/180)	-	-	-	-
18	36974514	G	C	Gm42416	ENSMUST00000115661.4	c.2385+19364G>C		intron_variant	1	-	-	-	-	-	-	-	-	-	-	-	-	-	-	-	-	-	-	-	-	-	-	-	-	-	-	-	-	-	-	-	-	-	-	-	0.1333 (24/180)	-	-	-	-
18	36974514	G	C	Gm37013	ENSMUST00000194544.1	c.222+4377G>C		intron_variant	1	-	-	-	-	-	-	-	-	-	-	-	-	-	-	-	-	-	-	-	-	-	-	-	-	-	-	-	-	-	-	-	-	-	-	-	0.1333 (24/180)	-	-	-	-
18	37402726	A	T	Pcdhb9	ENSMUST00000057228.1	c.1772A>T	p.Asp591Val	missense_variant	1	-	-	-	-	-	-	-	-	-	-	-	-	-	-	-	-	-	-	-	-	-	-	-	-	-	-	-	-	-	-	-	-	-	-	-	-	-	-	-	-
18	37402726	A	T	Gm42416	ENSMUST00000115661.4	c.2386-422295A>T		intron_variant	1	-	-	-	-	-	-	-	-	-	-	-	-	-	-	-	-	-	-	-	-	-	-	-	-	-	-	-	-	-	-	-	-	-	-	-	-	-	-	-	-
18	37402726	A	T	Gm37013	ENSMUST00000194544.1	c.223-422295A>T		intron_variant	1	-	-	-	-	-	-	-	-	-	-	-	-	-	-	-	-	-	-	-	-	-	-	-	-	-	-	-	-	-	-	-	-	-	-	-	-	-	-	-	-
18	37402726	A	T	Gm37388	ENSMUST00000193984.1	c.337-422295A>T		intron_variant	1	-	-	-	-	-	-	-	-	-	-	-	-	-	-	-	-	-	-	-	-	-	-	-	-	-	-	-	-	-	-	-	-	-	-	-	-	-	-	-	-
18	37474926	G	T	Pcdhb15	ENSMUST00000050034.2	c.1210G>T	p.Val404Leu	missense_variant	1	-	-	-	-	-	-	-	-	-	-	-	-	-	-	-	-	-	-	-	-	-	-	-	-	-	-	-	-	-	-	-	-	-	-	-	-	-	-	-	-
18	37474926	G	T	Gm42416	ENSMUST00000115661.4	c.2386-350095G>T		intron_variant	1	-	-	-	-	-	-	-	-	-	-	-	-	-	-	-	-	-	-	-	-	-	-	-	-	-	-	-	-	-	-	-	-	-	-	-	-	-	-	-	-
18	37474926	G	T	Gm37013	ENSMUST00000194544.1	c.223-350095G>T		intron_variant	1	-	-	-	-	-	-	-	-	-	-	-	-	-	-	-	-	-	-	-	-	-	-	-	-	-	-	-	-	-	-	-	-	-	-	-	-	-	-	-	-
18	37474926	G	T	Gm37388	ENSMUST00000193984.1	c.337-350095G>T		intron_variant	1	-	-	-	-	-	-	-	-	-	-	-	-	-	-	-	-	-	-	-	-	-	-	-	-	-	-	-	-	-	-	-	-	-	-	-	-	-	-	-	-
18	37474929	A	C	Pcdhb15	ENSMUST00000050034.2	c.1213A>C	p.Thr405Pro	missense_variant	1	-	-	-	-	-	-	-	-	-	-	-	-	-	-	-	-	-	-	-	-	-	-	-	-	-	-	-	-	-	-	-	-	-	-	-	-	-	-	-	-
18	37474929	A	C	Gm42416	ENSMUST00000115661.4	c.2386-350092A>C		intron_variant	1	-	-	-	-	-	-	-	-	-	-	-	-	-	-	-	-	-	-	-	-	-	-	-	-	-	-	-	-	-	-	-	-	-	-	-	-	-	-	-	-
18	37474929	A	C	Gm37013	ENSMUST00000194544.1	c.223-350092A>C		intron_variant	1	-	-	-	-	-	-	-	-	-	-	-	-	-	-	-	-	-	-	-	-	-	-	-	-	-	-	-	-	-	-	-	-	-	-	-	-	-	-	-	-
18	37474929	A	C	Gm37388	ENSMUST00000193984.1	c.337-350092A>C		intron_variant	1	-	-	-	-	-	-	-	-	-	-	-	-	-	-	-	-	-	-	-	-	-	-	-	-	-	-	-	-	-	-	-	-	-	-	-	-	-	-	-	-
18	37487178	C	G	Pcdhb17	ENSMUST00000053856.5	c.2020C>G	p.Pro674Ala	missense_variant	2	-	-	-	-	-	-	-	-	-	-	-	-	-	-	-	0.6977 (30/43)	-	-	-	-	-	-	-	-	-	-	-	-	-	-	-	-	-	0.2775 (96/346)	-	-	-	-	-	-
18	37487178	C	G	Gm42416	ENSMUST00000115661.4	c.2386-337843C>G		intron_variant	2	-	-	-	-	-	-	-	-	-	-	-	-	-	-	-	0.6977 (30/43)	-	-	-	-	-	-	-	-	-	-	-	-	-	-	-	-	-	0.2775 (96/346)	-	-	-	-	-	-
18	37487178	C	G	Gm37013	ENSMUST00000194544.1	c.223-337843C>G		intron_variant	2	-	-	-	-	-	-	-	-	-	-	-	-	-	-	-	0.6977 (30/43)	-	-	-	-	-	-	-	-	-	-	-	-	-	-	-	-	-	0.2775 (96/346)	-	-	-	-	-	-
18	37487178	C	G	Gm37388	ENSMUST00000193984.1	c.337-337843C>G		intron_variant	2	-	-	-	-	-	-	-	-	-	-	-	-	-	-	-	0.6977 (30/43)	-	-	-	-	-	-	-	-	-	-	-	-	-	-	-	-	-	0.2775 (96/346)	-	-	-	-	-	-
18	37491825	G	T	Pcdhb18	ENSMUST00000055949.3	c.2207G>T	p.Gly736Val	missense_variant	1	-	-	-	-	-	-	-	-	-	-	-	-	-	-	-	-	-	-	-	-	-	-	-	-	-	-	-	-	-	-	-	-	-	-	-	-	-	-	-	-
18	37491825	G	T	Gm42416	ENSMUST00000115661.4	c.2386-333196G>T		intron_variant	1	-	-	-	-	-	-	-	-	-	-	-	-	-	-	-	-	-	-	-	-	-	-	-	-	-	-	-	-	-	-	-	-	-	-	-	-	-	-	-	-
18	37491825	G	T	Gm37013	ENSMUST00000194544.1	c.223-333196G>T		intron_variant	1	-	-	-	-	-	-	-	-	-	-	-	-	-	-	-	-	-	-	-	-	-	-	-	-	-	-	-	-	-	-	-	-	-	-	-	-	-	-	-	-
18	37491825	G	T	Gm37388	ENSMUST00000193984.1	c.337-333196G>T		intron_variant	1	-	-	-	-	-	-	-	-	-	-	-	-	-	-	-	-	-	-	-	-	-	-	-	-	-	-	-	-	-	-	-	-	-	-	-	-	-	-	-	-
18	37516107	A	G	Pcdhb21	ENSMUST00000061405.5	c.2288A>G	p.Asn763Ser	missense_variant	1	-	-	-	-	-	-	-	-	-	-	-	-	-	-	-	-	-	-	-	-	-	-	-	-	-	-	-	-	-	-	-	-	-	0.2042 (29/142)	-	-	-	-	-	-
18	37516107	A	G	Gm42416	ENSMUST00000115661.4	c.2386-308914A>G		intron_variant	1	-	-	-	-	-	-	-	-	-	-	-	-	-	-	-	-	-	-	-	-	-	-	-	-	-	-	-	-	-	-	-	-	-	0.2042 (29/142)	-	-	-	-	-	-
18	37516107	A	G	Gm37013	ENSMUST00000194544.1	c.223-308914A>G		intron_variant	1	-	-	-	-	-	-	-	-	-	-	-	-	-	-	-	-	-	-	-	-	-	-	-	-	-	-	-	-	-	-	-	-	-	0.2042 (29/142)	-	-	-	-	-	-
18	37516107	A	G	Gm37388	ENSMUST00000193984.1	c.337-308914A>G		intron_variant	1	-	-	-	-	-	-	-	-	-	-	-	-	-	-	-	-	-	-	-	-	-	-	-	-	-	-	-	-	-	-	-	-	-	0.2042 (29/142)	-	-	-	-	-	-
18	37743072	C	T	Pcdhgb6	ENSMUST00000003599.8	c.832C>T	p.Leu278Phe	missense_variant	1	-	-	-	-	-	-	-	-	-	-	-	-	-	-	-	-	-	-	-	-	-	-	-	-	-	-	-	-	-	-	-	-	-	0.1589 (17/107)	-	-	-	-	-	-
18	37743072	C	T	Pcdhga1	ENSMUST00000194190.1	c.2421+78707C>T		intron_variant	1	-	-	-	-	-	-	-	-	-	-	-	-	-	-	-	-	-	-	-	-	-	-	-	-	-	-	-	-	-	-	-	-	-	0.1589 (17/107)	-	-	-	-	-	-
18	37743072	C	T	Pcdhga2	ENSMUST00000193869.1	c.2421+71547C>T		intron_variant	1	-	-	-	-	-	-	-	-	-	-	-	-	-	-	-	-	-	-	-	-	-	-	-	-	-	-	-	-	-	-	-	-	-	0.1589 (17/107)	-	-	-	-	-	-
18	37743072	C	T	Pcdhga3	ENSMUST00000073447.7	c.2412+66165C>T		intron_variant	1	-	-	-	-	-	-	-	-	-	-	-	-	-	-	-	-	-	-	-	-	-	-	-	-	-	-	-	-	-	-	-	-	-	0.1589 (17/107)	-	-	-	-	-	-
18	37743072	C	T	Pcdhgb1	ENSMUST00000192931.1	c.2382+60233C>T		intron_variant	1	-	-	-	-	-	-	-	-	-	-	-	-	-	-	-	-	-	-	-	-	-	-	-	-	-	-	-	-	-	-	-	-	-	0.1589 (17/107)	-	-	-	-	-	-
18	37743072	C	T	Pcdhga4	ENSMUST00000194418.1	c.2418+55255C>T		intron_variant	1	-	-	-	-	-	-	-	-	-	-	-	-	-	-	-	-	-	-	-	-	-	-	-	-	-	-	-	-	-	-	-	-	-	0.1589 (17/107)	-	-	-	-	-	-
18	37743072	C	T	Pcdhgb2	ENSMUST00000195112.1	c.2412+50703C>T		intron_variant	1	-	-	-	-	-	-	-	-	-	-	-	-	-	-	-	-	-	-	-	-	-	-	-	-	-	-	-	-	-	-	-	-	-	0.1589 (17/107)	-	-	-	-	-	-
18	37743072	C	T	Pcdhga5	ENSMUST00000193414.1	c.2424+46148C>T		intron_variant	1	-	-	-	-	-	-	-	-	-	-	-	-	-	-	-	-	-	-	-	-	-	-	-	-	-	-	-	-	-	-	-	-	-	0.1589 (17/107)	-	-	-	-	-	-
18	37743072	C	T	Pcdhga6	ENSMUST00000195823.1	c.2424+33420C>T		intron_variant	1	-	-	-	-	-	-	-	-	-	-	-	-	-	-	-	-	-	-	-	-	-	-	-	-	-	-	-	-	-	-	-	-	-	0.1589 (17/107)	-	-	-	-	-	-
18	37743072	C	T	Pcdhga7	ENSMUST00000192511.1	c.2433+25698C>T		intron_variant	1	-	-	-	-	-	-	-	-	-	-	-	-	-	-	-	-	-	-	-	-	-	-	-	-	-	-	-	-	-	-	-	-	-	0.1589 (17/107)	-	-	-	-	-	-
18	37743072	C	T	Pcdhgb4	ENSMUST00000195363.1	c.2364+20155C>T		intron_variant	1	-	-	-	-	-	-	-	-	-	-	-	-	-	-	-	-	-	-	-	-	-	-	-	-	-	-	-	-	-	-	-	-	-	0.1589 (17/107)	-	-	-	-	-	-
18	37743072	C	T	Pcdhga8	ENSMUST00000066149.8	c.2424+14756C>T		intron_variant	1	-	-	-	-	-	-	-	-	-	-	-	-	-	-	-	-	-	-	-	-	-	-	-	-	-	-	-	-	-	-	-	-	-	0.1589 (17/107)	-	-	-	-	-	-
18	37743072	C	T	Pcdhgb5	ENSMUST00000192535.1	c.2406+9513C>T		intron_variant	1	-	-	-	-	-	-	-	-	-	-	-	-	-	-	-	-	-	-	-	-	-	-	-	-	-	-	-	-	-	-	-	-	-	0.1589 (17/107)	-	-	-	-	-	-
18	37743072	C	T	Pcdhga9	ENSMUST00000091935.6	c.2424+3529C>T		intron_variant	1	-	-	-	-	-	-	-	-	-	-	-	-	-	-	-	-	-	-	-	-	-	-	-	-	-	-	-	-	-	-	-	-	-	0.1589 (17/107)	-	-	-	-	-	-
18	37743072	C	T	Gm42416	ENSMUST00000115661.4	c.2386-81949C>T		intron_variant	1	-	-	-	-	-	-	-	-	-	-	-	-	-	-	-	-	-	-	-	-	-	-	-	-	-	-	-	-	-	-	-	-	-	0.1589 (17/107)	-	-	-	-	-	-
18	37743072	C	T	Gm37013	ENSMUST00000194544.1	c.223-81949C>T		intron_variant	1	-	-	-	-	-	-	-	-	-	-	-	-	-	-	-	-	-	-	-	-	-	-	-	-	-	-	-	-	-	-	-	-	-	0.1589 (17/107)	-	-	-	-	-	-
18	37743072	C	T	Gm37388	ENSMUST00000193984.1	c.337-81949C>T		intron_variant	1	-	-	-	-	-	-	-	-	-	-	-	-	-	-	-	-	-	-	-	-	-	-	-	-	-	-	-	-	-	-	-	-	-	0.1589 (17/107)	-	-	-	-	-	-
18	38281774	G	C	Pcdh12	ENSMUST00000025311.6	c.2297C>G	p.Pro766Arg	missense_variant	1	-	-	-	-	-	-	-	-	-	-	-	-	-	-	-	-	-	-	-	-	-	-	-	-	-	-	-	-	-	-	-	-	-	-	-	-	-	-	-	-
18	39774510	T	G	Pabpc2	ENSMUST00000063219.2	c.827T>G	p.Leu276Arg	missense_variant	1	-	-	-	-	-	-	-	-	0.3219 (47/146)	-	-	-	-	-	-	-	-	-	-	-	-	-	-	-	-	-	-	-	-	-	-	-	-	-	-	-	-	-	-	-
18	43546970	A	C	Jakmip2	ENSMUST00000082254.6	c.2321T>G	p.Met774Arg	missense_variant	1	-	-	-	-	-	-	-	-	-	-	-	-	-	-	-	-	-	-	-	-	-	-	-	-	-	-	-	-	-	-	-	-	-	-	-	-	-	-	-	-
18	44083340	C	CTT	Spink6	ENSMUST00000068473.2	c.273-12_273-11dupTT		intron_variant	1	-	-	-	-	-	-	-	-	-	-	-	-	-	-	-	-	-	-	-	-	-	-	-	-	-	-	-	-	-	-	-	-	-	-	-	-	-	-	-	-
18	46237408	T	TTG	Trim36-Pggt1b	ENSMUSG00000033949-ENSMUSG00000024477	n.46237408_46237409insTG		intergenic_region	1	-	-	-	-	-	0.1224 (6/49)	-	-	-	-	-	-	-	-	-	-	-	-	-	-	-	-	-	-	-	-	-	-	-	-	-	-	-	-	-	-	-	-	-	-
18	47112364	T	G	Commd10-Gm25036	ENSMUSG00000042705-ENSMUSG00000093158	n.47112364T>G		intergenic_region	2	-	-	-	-	-	-	-	-	-	-	-	-	-	-	-	-	-	-	-	-	-	-	-	-	-	-	-	-	-	-	-	-	-	-	-	-	-	-	-	-
18	49724183	G	A	Dtwd2	ENSMUST00000025383.8	c.334C>T	p.Pro112Ser	missense_variant	2	-	-	-	-	-	-	-	-	-	-	-	-	-	-	-	-	-	-	-	-	-	-	-	-	-	-	-	-	-	-	-	-	-	-	-	-	-	-	-	-
18	53948725	T	G	Csnk1g3	ENSMUST00000069597.6	c.1220+57T>G		intron_variant	1	-	-	-	-	-	-	-	-	-	-	-	-	0.1471 (5/34)	-	-	-	-	-	-	-	-	-	-	-	-	-	-	-	-	-	-	-	-	-	-	-	-	-	-	-
18	56562566	A	G	Aldh7a1	ENSMUSG00000053644	n.56562566T>C		intragenic_variant	1	-	-	-	-	-	-	-	-	-	-	-	-	-	-	-	-	-	-	-	-	-	-	-	-	-	-	-	-	-	-	-	-	-	-	-	-	-	-	-	-
18	56562566	A	G	Phax	ENSMUSG00000008301	n.56562566A>G		intragenic_variant	1	-	-	-	-	-	-	-	-	-	-	-	-	-	-	-	-	-	-	-	-	-	-	-	-	-	-	-	-	-	-	-	-	-	-	-	-	-	-	-	-
18	60269951	C	T	Gm4841	ENSMUST00000090260.4	c.1069G>A	p.Glu357Lys	missense_variant	1	-	-	-	-	-	-	-	-	-	-	-	-	-	-	-	-	-	-	-	-	-	-	-	-	-	-	-	-	-	-	-	-	-	-	-	-	0.6923 (9/13)	-	-	-
18	60269959	C	A	Gm4841	ENSMUST00000090260.4	c.1061G>T	p.Cys354Phe	missense_variant	1	-	-	-	-	-	-	-	-	-	-	-	-	-	-	-	-	-	-	-	-	-	-	-	-	-	-	-	-	-	-	-	-	-	-	-	-	0.5833 (7/12)	-	-	-
18	60269963	T	C	Gm4841	ENSMUST00000090260.4	c.1057A>G	p.Lys353Glu	missense_variant	1	-	-	-	-	-	-	-	-	-	-	-	-	-	-	-	-	-	-	-	-	-	-	-	-	-	-	-	-	-	-	-	-	-	-	-	-	0.5833 (7/12)	-	-	-
18	60269985	G	T	Gm4841	ENSMUST00000090260.4	c.1035C>A	p.Asn345Lys	missense_variant	2	-	-	-	-	-	-	-	-	-	-	-	-	-	-	-	-	-	-	-	-	-	-	-	-	-	0.4737 (9/19)	-	-	-	-	-	-	-	-	0.4167 (5/12)	-	-	-	-	-
18	60300394	C	G	F830016B08Rik	ENSMUST00000171297.1	c.548C>G	p.Thr183Ser	missense_variant	1	-	-	-	-	-	-	-	-	-	-	-	-	-	-	-	-	-	-	-	-	-	-	-	-	-	-	-	-	-	-	-	-	-	-	0.6923 (27/39)	-	-	-	-	-
18	60579062	T	G	Myoz3	ENSMUST00000056533.7	c.443A>C	p.Lys148Thr	missense_variant	1	-	-	-	-	-	-	-	-	-	-	-	-	-	-	-	-	-	-	-	-	-	-	-	-	-	-	-	-	-	-	-	-	-	-	-	-	-	-	-	-
18	60595723	C	G	Synpo	ENSMUST00000130360.1	c.*103G>C		3_prime_UTR_variant	1	-	-	-	-	-	-	-	-	-	-	-	-	-	-	-	-	-	-	-	-	-	-	-	-	-	-	-	0.4574 (86/188)	-	-	-	-	-	-	-	-	-	-	-	-
18	60808229	C	A	Cd74	ENSMUST00000097563.8	c.248-3C>A		splice_region_variant&intron_variant	1	-	-	-	-	-	-	-	-	-	-	-	-	-	-	-	-	-	-	-	-	-	-	-	-	-	-	-	-	-	-	-	-	-	-	0.2069 (6/29)	-	-	-	-	-
18	60808231	G	T	Cd74	ENSMUST00000097563.8	c.248-1G>T		splice_acceptor_variant&intron_variant	1	-	-	-	-	-	-	-	-	-	-	-	-	-	-	-	-	-	-	-	-	-	-	-	-	-	-	-	-	-	-	-	-	-	-	0.2414 (7/29)	-	-	-	-	-
18	61129803	G	A	Csf1r	ENSMUST00000025523.12	c.2648+1G>A		splice_donor_variant&intron_variant	1	-	-	-	-	-	-	-	-	-	-	-	-	-	-	-	-	-	-	-	-	-	-	-	-	-	-	-	-	-	-	-	-	-	-	-	-	-	-	-	-
18	64511688	A	C	Nars	ENSMUST00000025483.9	c.298T>G	p.Leu100Val	missense_variant	1	-	-	-	-	-	-	-	-	-	0.3842 (297/773)	-	-	-	-	-	-	-	-	-	-	-	-	-	-	-	-	-	-	-	-	-	-	-	-	-	-	-	-	-	-
18	69989600	A	G	Rab27b	ENSMUST00000069749.8	c.287T>C	p.Leu96Ser	missense_variant	1	-	-	-	-	-	-	-	-	-	-	-	-	-	-	-	-	-	-	-	-	-	-	-	-	-	-	-	-	-	-	-	-	-	-	-	-	-	-	-	-
18	74804028	T	A	Acaa2	ENSMUST00000041053.9	c.982T>A	p.Leu328Met	missense_variant	1	-	-	-	-	-	-	-	-	-	-	-	-	-	-	-	-	-	-	-	-	-	-	-	-	-	-	-	-	-	-	-	-	-	-	0.1011 (18/178)	-	-	-	-	-
18	77442147	G	T	Loxhd1	ENSMUST00000096547.9	c.*278G>T		3_prime_UTR_variant	1	-	-	-	-	-	-	-	-	-	-	-	-	-	-	-	-	-	-	-	-	-	-	-	-	-	-	-	-	-	-	-	-	-	-	-	-	-	-	-	-
18	80762079	G	A	Atp9b	ENSMUST00000091790.3	c.2263C>T	p.Arg755Cys	missense_variant	1	-	-	-	-	-	-	-	-	-	-	-	-	-	-	-	-	-	-	-	-	-	-	-	-	-	-	-	-	-	-	-	-	-	-	-	-	-	-	-	-
18	82987254	A	G	Zfp516	ENSMUST00000071233.6	c.2282A>G	p.Lys761Arg	missense_variant	1	-	-	-	-	-	-	-	-	-	-	-	-	-	-	-	-	-	-	-	-	-	-	-	-	-	-	-	-	-	-	-	-	-	-	-	-	-	-	-	-
18	84675022	C	A	Cndp2	ENSMUST00000025546.15	c.612G>T	p.Pro204Pro	synonymous_variant	1	-	-	-	-	0.3425 (25/73)	-	-	-	-	-	-	-	-	-	-	-	-	-	-	-	-	-	-	-	-	-	-	-	-	-	-	-	-	-	-	-	-	-	-	-
19	3864657	C	A	Chka	ENSMUST00000025760.12	c.348C>A	p.Leu116Leu	synonymous_variant	1	-	-	-	-	-	-	-	-	-	-	-	-	-	-	-	-	-	-	-	-	-	-	-	-	-	-	-	-	-	-	-	-	-	-	-	-	-	-	-	-
19	3898944	A	T	Tcirg1	ENSMUST00000001801.10	c.1308+36T>A		intron_variant	1	-	-	-	-	-	0.1884 (13/69)	-	-	-	-	-	-	-	-	-	-	-	-	-	-	-	-	-	-	-	-	-	-	-	-	-	-	-	-	-	-	-	-	-	-
19	4762125	T	C	Rbm4b	ENSMUST00000036744.7	c.561T>C	p.Thr187Thr	synonymous_variant	1	-	-	-	-	-	-	-	-	-	-	-	-	-	-	-	-	-	-	-	-	-	-	-	-	-	-	-	-	-	-	-	-	-	-	-	-	-	-	-	-
19	4762125	T	C	Gm21992	ENSMUSG00000096370	n.4762125A>G		intragenic_variant	1	-	-	-	-	-	-	-	-	-	-	-	-	-	-	-	-	-	-	-	-	-	-	-	-	-	-	-	-	-	-	-	-	-	-	-	-	-	-	-	-
19	4762125	T	C	Gm37206	ENSMUST00000195512.1	n.3047A>G		non_coding_transcript_exon_variant	1	-	-	-	-	-	-	-	-	-	-	-	-	-	-	-	-	-	-	-	-	-	-	-	-	-	-	-	-	-	-	-	-	-	-	-	-	-	-	-	-
19	4762227	T	C	Rbm4b	ENSMUST00000036744.7	c.663T>C	p.Tyr221Tyr	synonymous_variant	1	-	-	-	-	-	-	-	-	-	-	-	-	-	-	-	-	-	-	-	-	-	-	-	-	-	-	-	-	-	-	-	-	-	-	-	-	-	-	-	-
19	4762227	T	C	Gm21992	ENSMUSG00000096370	n.4762227A>G		intragenic_variant	1	-	-	-	-	-	-	-	-	-	-	-	-	-	-	-	-	-	-	-	-	-	-	-	-	-	-	-	-	-	-	-	-	-	-	-	-	-	-	-	-
19	4762227	T	C	Gm37206	ENSMUST00000195512.1	n.2945A>G		non_coding_transcript_exon_variant	1	-	-	-	-	-	-	-	-	-	-	-	-	-	-	-	-	-	-	-	-	-	-	-	-	-	-	-	-	-	-	-	-	-	-	-	-	-	-	-	-
19	4762248	T	C	Rbm4b	ENSMUST00000036744.7	c.684T>C	p.Ser228Ser	synonymous_variant	1	-	-	-	-	-	-	-	-	-	-	-	-	-	-	-	-	-	-	-	-	-	-	-	-	-	-	-	-	-	-	-	-	-	-	-	-	-	-	-	-
19	4762248	T	C	Gm21992	ENSMUSG00000096370	n.4762248A>G		intragenic_variant	1	-	-	-	-	-	-	-	-	-	-	-	-	-	-	-	-	-	-	-	-	-	-	-	-	-	-	-	-	-	-	-	-	-	-	-	-	-	-	-	-
19	4762248	T	C	Gm37206	ENSMUST00000195512.1	n.2924A>G		non_coding_transcript_exon_variant	1	-	-	-	-	-	-	-	-	-	-	-	-	-	-	-	-	-	-	-	-	-	-	-	-	-	-	-	-	-	-	-	-	-	-	-	-	-	-	-	-
19	4762374	T	C	Rbm4b	ENSMUST00000036744.7	c.810T>C	p.Pro270Pro	synonymous_variant	1	-	-	-	-	-	-	-	-	-	-	-	-	-	-	-	-	-	-	-	-	-	-	-	-	-	-	-	-	-	-	-	-	-	-	-	-	-	-	-	-
19	4762374	T	C	Gm21992	ENSMUSG00000096370	n.4762374A>G		intragenic_variant	1	-	-	-	-	-	-	-	-	-	-	-	-	-	-	-	-	-	-	-	-	-	-	-	-	-	-	-	-	-	-	-	-	-	-	-	-	-	-	-	-
19	4762374	T	C	Gm37206	ENSMUST00000195512.1	n.2798A>G		non_coding_transcript_exon_variant	1	-	-	-	-	-	-	-	-	-	-	-	-	-	-	-	-	-	-	-	-	-	-	-	-	-	-	-	-	-	-	-	-	-	-	-	-	-	-	-	-
19	4762375	T	C	Rbm4b	ENSMUST00000036744.7	c.811T>C	p.Tyr271His	missense_variant	1	-	-	-	-	-	-	-	-	-	-	-	-	-	-	-	-	-	-	-	-	-	-	-	-	-	-	-	-	-	-	-	-	-	-	-	-	-	-	-	-
19	4762375	T	C	Gm21992	ENSMUSG00000096370	n.4762375A>G		intragenic_variant	1	-	-	-	-	-	-	-	-	-	-	-	-	-	-	-	-	-	-	-	-	-	-	-	-	-	-	-	-	-	-	-	-	-	-	-	-	-	-	-	-
19	4762375	T	C	Gm37206	ENSMUST00000195512.1	n.2797A>G		non_coding_transcript_exon_variant	1	-	-	-	-	-	-	-	-	-	-	-	-	-	-	-	-	-	-	-	-	-	-	-	-	-	-	-	-	-	-	-	-	-	-	-	-	-	-	-	-
19	4762591	T	C	Rbm4b	ENSMUST00000036744.7	c.1027T>C	p.Tyr343His	missense_variant	1	-	-	-	-	-	-	-	-	-	-	-	-	-	-	-	-	-	-	-	-	-	-	-	-	-	-	-	-	-	-	-	-	-	-	-	-	-	-	-	-
19	4762591	T	C	Gm21992	ENSMUSG00000096370	n.4762591A>G		intragenic_variant	1	-	-	-	-	-	-	-	-	-	-	-	-	-	-	-	-	-	-	-	-	-	-	-	-	-	-	-	-	-	-	-	-	-	-	-	-	-	-	-	-
19	4762591	T	C	Gm37206	ENSMUST00000195512.1	n.2581A>G		non_coding_transcript_exon_variant	1	-	-	-	-	-	-	-	-	-	-	-	-	-	-	-	-	-	-	-	-	-	-	-	-	-	-	-	-	-	-	-	-	-	-	-	-	-	-	-	-
19	4762610	T	C	Rbm4b	ENSMUST00000036744.7	c.1046T>C	p.Val349Ala	missense_variant	1	-	-	-	-	-	-	-	-	-	-	-	-	-	-	-	-	-	-	-	-	-	-	-	-	-	-	-	-	-	-	-	-	-	-	-	-	-	-	-	-
19	4762610	T	C	Gm21992	ENSMUSG00000096370	n.4762610A>G		intragenic_variant	1	-	-	-	-	-	-	-	-	-	-	-	-	-	-	-	-	-	-	-	-	-	-	-	-	-	-	-	-	-	-	-	-	-	-	-	-	-	-	-	-
19	4762610	T	C	Gm37206	ENSMUST00000195512.1	n.2562A>G		non_coding_transcript_exon_variant	1	-	-	-	-	-	-	-	-	-	-	-	-	-	-	-	-	-	-	-	-	-	-	-	-	-	-	-	-	-	-	-	-	-	-	-	-	-	-	-	-
19	4916351	C	T	Dpp3	ENSMUST00000025851.3	c.1317G>A	p.Lys439Lys	synonymous_variant	1	-	-	-	-	0.3007 (46/153)	-	-	-	-	-	-	-	-	-	-	-	-	-	-	-	-	-	-	-	-	-	-	-	-	-	-	-	-	-	-	-	-	-	-	-
19	5055149	G	A	Rin1	ENSMUST00000025818.6	c.2203G>A	p.Val735Ile	missense_variant	1	-	-	-	-	-	-	-	-	-	-	-	-	-	-	-	-	-	-	-	-	-	-	-	-	-	-	0.1268 (9/71)	-	-	-	-	-	-	-	-	-	-	-	-	-
19	5696135	G	T	Map3k11	ENSMUST00000004156.8	c.1377G>T	p.Thr459Thr	synonymous_variant	1	-	-	-	-	-	-	-	-	-	-	-	-	-	-	-	-	-	-	-	-	-	-	-	-	-	-	-	-	-	-	-	-	-	-	-	-	-	-	-	-
19	5706310	T	A	Kcnk7	ENSMUST00000052448.3	c.563T>A	p.Leu188Gln	missense_variant	1	-	-	-	-	-	-	-	-	-	-	-	-	-	-	-	-	-	-	-	-	-	-	-	0.1304 (9/69)	-	-	-	-	-	-	-	-	-	-	-	-	-	-	-	-
19	5986023	A	C	Slc22a20	ENSMUST00000041827.7	c.118T>G	p.Phe40Val	missense_variant	1	-	-	-	-	-	-	-	-	-	-	-	-	-	-	-	-	-	-	-	-	-	-	-	-	-	-	-	-	-	-	-	-	-	-	-	-	-	-	-	-
19	6058580	C	CT	Fau	ENSMUST00000043074.11	c.220+15dupT		intron_variant	1	-	-	-	-	-	-	-	-	-	-	0.3077 (4/13)	-	-	-	-	-	-	-	-	-	-	-	-	-	-	-	-	-	-	-	-	-	-	-	-	-	-	-	-	-
19	6120634	T	G	Snx15	ENSMUST00000025702.13	c.774A>C	p.Glu258Asp	missense_variant	1	-	-	-	-	-	-	-	-	-	0.2763 (21/76)	-	-	-	-	-	-	-	-	-	-	-	-	-	-	-	-	-	-	-	-	-	-	-	-	-	-	-	-	-	-
19	6232541	T	G	Ppp2r5b	ENSMUST00000025695.9	c.578A>C	p.Lys193Thr	missense_variant	2	-	-	-	-	-	-	-	-	-	-	-	-	-	-	-	-	-	-	-	-	-	-	-	-	-	-	-	-	-	-	-	-	-	-	-	-	-	-	-	-
19	6250598	T	C	Atg2a	ENSMUST00000045351.12	c.2204T>C	p.Val735Ala	missense_variant&splice_region_variant	1	-	-	-	-	-	-	-	-	-	-	-	-	-	-	-	-	-	-	-	-	-	-	-	-	-	-	-	-	-	-	-	-	-	-	-	-	-	-	-	-
19	6320091	T	G	Cdc42bpg	ENSMUST00000025681.7	c.3314T>G	p.Leu1105Arg	missense_variant	2	-	-	-	-	-	-	-	-	-	-	-	-	-	-	-	-	-	-	-	-	-	-	-	-	-	-	-	-	-	-	-	-	-	-	-	-	-	-	-	-
19	6954227	G	C	Plcb3	ENSMUST00000025912.8	c.3574C>G	p.Leu1192Val	missense_variant	1	-	-	-	-	-	-	-	-	-	-	-	-	-	-	-	-	-	-	-	-	-	-	-	-	-	-	-	-	-	-	-	-	-	-	-	-	-	-	-	-
19	7682854	T	G	Slc22a19	ENSMUST00000025666.7	c.1190A>C	p.Asn397Thr	missense_variant	1	-	-	-	-	-	-	-	-	-	-	-	-	-	-	-	-	-	-	-	-	-	-	-	-	-	-	-	-	-	-	-	-	-	0.1033 (19/184)	-	-	-	-	-	-
19	8902317	T	G	Ganab	ENSMUST00000096246.3	c.92T>G	p.Leu31Arg	missense_variant	1	-	-	-	-	-	-	-	-	-	0.3427 (85/248)	-	-	-	-	-	-	-	-	-	-	-	-	-	-	-	-	-	-	-	-	-	-	-	-	-	-	-	-	-	-
19	8928841	A	G	Rom1	ENSMUST00000096242.3	c.333T>C	p.Gly111Gly	synonymous_variant	1	-	-	-	-	-	-	-	-	-	-	0.2778 (5/18)	-	-	-	-	-	-	-	-	-	-	-	-	-	-	-	-	-	-	-	-	-	-	-	-	-	-	-	-	-
19	11302333	C	T	Ms4a14	ENSMUST00000187467.1	c.2860G>A	p.Glu954Lys	missense_variant	1	-	-	0.1308 (17/130)	-	-	-	-	-	-	-	-	-	-	-	-	-	-	-	-	-	-	-	-	-	-	-	-	-	-	-	-	-	-	-	-	-	-	-	-	-
19	11481294	G	GT	Ms4a6c	ENSMUST00000165310.2	c.*90dupT		3_prime_UTR_variant	3	-	-	-	-	-	-	-	-	-	-	-	-	-	-	-	-	-	-	-	-	-	-	-	-	-	-	-	-	-	-	-	-	-	-	-	-	-	-	-	-
19	11481294	G	GT	BE692007	ENSMUST00000186500.1	n.3241dupA		non_coding_transcript_exon_variant	3	-	-	-	-	-	-	-	-	-	-	-	-	-	-	-	-	-	-	-	-	-	-	-	-	-	-	-	-	-	-	-	-	-	-	-	-	-	-	-	-
19	12463250	T	C	Mpeg1	ENSMUST00000081035.7	c.2071T>C	p.Tyr691His	missense_variant	1	-	-	-	-	-	-	-	-	-	-	-	-	-	-	-	-	-	-	-	-	-	-	-	-	-	-	-	-	-	-	-	-	-	-	-	-	-	-	-	-
19	13471125	C	T	Olfr1474	ENSMUST00000096202.1	c.154C>T	p.Arg52*	stop_gained	1	-	-	-	-	-	-	-	-	-	-	-	-	-	-	-	-	-	-	-	-	-	-	-	-	-	-	-	-	-	-	-	-	-	-	-	-	-	-	-	-
19	13749381	G	T	Olfr1494	ENSMUST00000051768.3	c.274G>T	p.Ala92Ser	missense_variant	1	-	-	-	-	-	-	-	-	-	-	-	-	-	-	-	-	-	-	-	-	-	-	-	-	-	-	-	-	-	-	-	-	-	-	-	-	-	-	-	-
19	14465298	C	A	Tle4	ENSMUST00000052011.13	c.1057G>T	p.Val353Leu	missense_variant	1	-	-	-	-	-	-	-	-	-	-	-	-	-	-	-	-	-	-	-	-	-	-	-	-	-	-	-	-	-	-	-	-	-	-	-	-	-	-	-	-
19	18854203	T	TA	Trpm6	ENSMUST00000040489.7	c.4439dupA	p.Trp1481fs	frameshift_variant	1	-	-	-	-	-	-	-	-	-	-	-	-	-	-	-	-	-	-	-	-	-	-	-	-	-	-	-	-	-	-	-	-	-	-	-	-	-	-	-	-
19	20377583	T	G	Anxa1	ENSMUST00000025561.7	c.802+24A>C		intron_variant	2	0.2125 (34/160)	-	-	-	-	-	-	-	-	-	-	-	-	-	-	-	-	-	-	-	-	-	-	-	-	-	-	-	-	-	-	-	0.2059 (7/34)	-	-	-	-	-	-	-
19	23244015	C	G	Smc5	ENSMUST00000087556.5	c.1149G>C	p.Leu383Leu	synonymous_variant	1	0.1066 (13/122)	-	-	-	-	-	-	-	-	-	-	-	-	-	-	-	-	-	-	-	-	-	-	-	-	-	-	-	-	-	-	-	-	-	-	-	-	-	-	-
19	26886038	A	AT	Gm815	ENSMUST00000099536.2	c.18+52dupT		intron_variant	1	-	-	-	-	-	-	-	-	-	-	-	-	-	-	-	-	-	-	-	-	-	-	-	-	-	-	-	-	-	-	-	-	-	-	-	-	-	-	-	-
19	28540188	C	T	Glis3	ENSMUST00000162022.7	c.596+13G>A		intron_variant	1	-	-	-	-	-	-	-	-	-	-	-	-	-	-	-	-	-	-	-	-	-	-	-	-	-	-	-	-	-	-	-	-	-	-	-	-	-	-	-	-
19	29134442	C	T	Rcl1	ENSMUST00000064393.5	c.910C>T	p.Leu304Phe	missense_variant	2	-	-	-	-	-	-	-	-	-	-	-	-	-	-	-	-	-	-	-	-	-	-	-	-	-	-	-	-	-	-	-	-	-	-	-	-	-	-	-	-
19	29437273	C	T	Pdcd1lg2	ENSMUST00000112576.2	c.99C>T	p.Asp33Asp	synonymous_variant	1	-	-	-	-	-	-	-	-	-	-	-	-	-	-	-	-	-	-	-	-	-	-	-	-	-	-	-	-	-	-	-	-	-	-	-	-	-	-	-	-
19	29811212	T	C	Ranbp6	ENSMUST00000099525.4	c.1739A>G	p.Lys580Arg	missense_variant	1	-	-	-	-	-	-	-	-	-	-	-	-	-	-	-	-	-	-	-	-	-	-	-	-	-	-	-	-	-	-	-	-	-	-	-	-	-	-	-	-
19	31908865	T	A	A1cf	ENSMUST00000075838.5	c.173T>A	p.Ile58Asn	missense_variant	1	-	-	-	-	-	-	-	-	-	-	-	-	-	-	-	-	-	-	-	-	-	-	-	-	-	-	-	-	-	-	-	-	-	-	-	-	-	-	-	-
19	32817996	CA	C	Pten	ENSMUST00000013807.7	c.968delA	p.Asn323fs	frameshift_variant	2	-	-	-	-	-	-	-	-	-	-	-	-	-	-	-	-	-	-	-	-	-	-	-	-	-	-	-	-	-	-	-	-	-	-	-	-	0.4177 (66/158)	-	-	-
19	34879219	AGGCGGATGGGGCTTTGTGT	A	Pank1	ENSMUST00000036584.11	c.-162_-144delACACAAAGCCCCATCCGCC		5_prime_UTR_variant	1	-	-	-	-	-	-	-	-	-	-	-	-	-	-	-	-	-	-	-	-	-	-	-	-	-	-	-	-	-	-	-	-	-	-	-	-	-	-	-	-
19	37913473	G	C	Myof	ENSMUST00000041475.14	c.5096C>G	p.Ala1699Gly	missense_variant	2	-	-	-	-	-	-	-	-	-	-	-	-	-	-	-	-	-	-	-	-	-	-	-	-	-	-	-	-	-	-	-	-	-	-	-	-	-	-	-	-
19	40915425	T	C	Zfp518a	ENSMUST00000050092.6	c.3797T>C	p.Phe1266Ser	missense_variant	1	-	-	-	-	-	-	-	-	-	-	-	-	-	-	-	-	-	-	-	-	-	-	-	-	-	-	-	-	-	-	-	-	-	-	-	-	-	-	-	-
19	40915429	A	T	Zfp518a	ENSMUST00000050092.6	c.3801A>T	p.Val1267Val	synonymous_variant	1	-	-	-	-	-	-	-	-	-	-	-	-	-	-	-	-	-	-	-	-	-	-	-	-	-	-	-	-	-	-	-	-	-	-	-	-	-	-	-	-
19	40915436	A	T	Zfp518a	ENSMUST00000050092.6	c.3808A>T	p.Asn1270Tyr	missense_variant	1	-	-	-	-	-	-	-	-	-	-	-	-	-	-	-	-	-	-	-	-	-	-	-	-	-	-	-	-	-	-	-	-	-	-	-	-	-	-	-	-
19	40915440	G	A	Zfp518a	ENSMUST00000050092.6	c.3812G>A	p.Arg1271Lys	missense_variant	1	-	-	-	-	-	-	-	-	-	-	-	-	-	-	-	-	-	-	-	-	-	-	-	-	-	-	-	-	-	-	-	-	-	-	-	-	-	-	-	-
19	41552539	C	CA	Lcor	ENSMUST00000067795.11	c.46dupA	p.Thr16fs	frameshift_variant	1	-	-	-	-	-	-	-	-	-	-	-	-	-	-	-	-	-	-	-	-	-	-	-	-	-	-	-	-	-	-	-	-	-	-	-	-	-	-	-	-
19	41953840	A	C	Mms19	ENSMUST00000171561.7	c.1610-22T>G		intron_variant	1	-	-	-	-	-	-	-	-	-	-	-	-	-	-	-	-	-	-	-	-	-	-	-	-	-	-	-	-	-	-	-	-	-	-	-	-	-	-	-	-
19	42592878	G	A	R3hcc1l-Loxl4	ENSMUSG00000025184-ENSMUSG00000025185	n.42592878G>A		intergenic_region	1	-	-	-	-	-	-	-	-	-	-	-	-	-	-	-	-	-	-	-	-	-	-	-	-	-	-	-	-	-	-	-	-	-	-	0.1333 (4/30)	-	-	-	-	-
19	44241698	G	T	Scd3	ENSMUST00000026220.5	c.919G>T	p.Asp307Tyr	missense_variant	1	-	-	-	-	-	-	-	-	-	-	-	-	-	-	-	-	-	-	-	-	-	-	-	-	-	-	-	-	-	-	-	-	-	-	-	-	-	-	-	-
19	44303062	C	G	Scd2	ENSMUST00000026221.5	c.939C>G	p.Arg313Arg	synonymous_variant	1	-	-	-	-	-	-	-	-	-	-	-	-	-	-	-	-	-	-	-	-	-	-	-	-	-	-	-	-	-	-	-	-	-	-	-	-	-	-	-	-
19	44997476	G	T	Sema4g	ENSMUST00000026225.14	c.807+21G>T		intron_variant	1	-	-	-	-	-	-	-	-	-	-	-	-	-	-	-	-	-	-	-	-	-	-	-	-	-	-	-	-	-	-	-	-	-	-	-	-	-	-	-	-
19	45027887	G	A	Pdzd7	ENSMUST00000145391.7	c.2794C>T	p.Arg932*	stop_gained	2	-	-	-	-	-	-	-	-	-	-	-	-	-	-	-	-	-	-	-	-	-	-	-	-	-	-	-	-	-	-	-	-	-	-	-	-	-	-	-	-
19	46265711	A	C	Gbf1	ENSMUST00000026254.13	c.1998A>C	p.Glu666Asp	missense_variant	1	-	-	-	-	-	-	-	-	-	-	-	-	-	-	-	-	-	-	-	-	-	-	-	-	-	-	-	-	-	-	-	-	-	-	-	-	-	-	-	-
19	46265711	A	C	Gm16726	ENSMUST00000130184.1	n.621+242T>G		intron_variant	1	-	-	-	-	-	-	-	-	-	-	-	-	-	-	-	-	-	-	-	-	-	-	-	-	-	-	-	-	-	-	-	-	-	-	-	-	-	-	-	-
19	46903896	C	T	Nt5c2	ENSMUST00000172239.2	c.449G>A	p.Gly150Glu	missense_variant	1	-	-	-	-	-	-	-	-	-	-	-	-	-	-	-	-	-	-	-	-	-	-	-	-	-	-	-	-	-	-	-	-	-	-	-	-	-	-	-	0.1613 (10/62)
19	47106341	G	GA	Pdcd11	ENSMUST00000072141.2	c.1570dupA	p.Thr524fs	frameshift_variant	1	-	-	-	-	-	-	-	-	-	-	-	-	-	-	-	-	-	-	-	-	-	-	-	-	-	-	-	-	-	-	-	-	-	-	-	-	0.2941 (5/17)	-	-	-
19	47106341	G	GA	Calhm2	ENSMUSG00000033033	n.47106342dupT		intragenic_variant	1	-	-	-	-	-	-	-	-	-	-	-	-	-	-	-	-	-	-	-	-	-	-	-	-	-	-	-	-	-	-	-	-	-	-	-	-	0.2941 (5/17)	-	-	-
19	47264117	T	A	Sh3pxd2a	ENSMUST00000081619.8	c.*2870A>T		3_prime_UTR_variant	1	-	-	-	-	-	-	-	-	-	-	-	-	-	-	-	-	-	-	-	-	-	-	-	-	-	-	-	-	-	-	-	-	-	-	-	-	-	-	-	-
19	47648728	T	G	Col17a1	ENSMUST00000026045.13	c.4087+3A>C		splice_region_variant&intron_variant	1	-	-	-	-	-	-	-	-	-	-	-	-	-	-	-	-	-	-	-	-	-	-	-	-	-	-	-	-	-	0.2174 (5/23)	-	-	-	-	-	-	-	-	-	-
19	47731756	G	C	Sfr1	ENSMUST00000099353.4	c.-53G>C		5_prime_UTR_premature_start_codon_gain_variant&5_prime_UTR_variant	2	-	-	-	-	-	-	-	-	-	0.2353 (4/17)	-	-	-	-	-	-	-	-	-	-	-	-	-	-	-	-	-	-	-	-	-	-	-	-	-	-	-	-	-	-
19	48206621	G	A	Sorcs3	ENSMUST00000078880.5	c.442G>A	p.Ala148Thr	missense_variant	1	-	-	-	-	-	-	-	-	-	-	-	-	-	-	-	-	-	-	-	-	-	-	-	-	-	-	-	-	-	-	-	-	-	-	-	-	-	-	-	-
19	48797481	G	C	Sorcs3	ENSMUST00000078880.5	c.3400G>C	p.Gly1134Arg	missense_variant	1	-	-	-	-	-	-	-	-	-	-	-	-	-	-	-	-	-	-	-	-	-	-	-	-	-	-	-	-	-	-	-	-	-	-	-	0.2768 (31/112)	-	-	-	-
19	50030362	T	C	Rpl13a-ps1	ENSMUST00000071866.1	c.374A>G	p.Lys125Arg	missense_variant	1	-	-	-	-	-	-	-	-	0.3103 (18/58)	-	-	-	-	-	-	-	-	-	-	-	-	-	-	-	-	-	-	-	-	-	-	-	-	-	-	-	-	-	-	-
19	50152779	C	A	Sorcs1	ENSMUST00000072685.12	c.3371+275G>T		intron_variant	1	-	-	-	-	-	-	-	-	-	-	-	-	-	-	-	-	-	-	-	-	-	-	-	-	-	-	-	-	-	-	-	-	-	-	-	-	-	-	-	-
19	50152779	C	A	RP23-213K14.2	ENSMUST00000210140.1	n.136+5630C>A		intron_variant	1	-	-	-	-	-	-	-	-	-	-	-	-	-	-	-	-	-	-	-	-	-	-	-	-	-	-	-	-	-	-	-	-	-	-	-	-	-	-	-	-
19	50475381	G	A	Sorcs1	ENSMUST00000072685.12	c.626+4C>T		splice_region_variant&intron_variant	1	-	-	-	-	-	-	-	-	-	-	-	-	-	-	-	-	-	-	-	-	-	-	-	-	-	-	-	-	-	-	-	-	-	-	-	-	-	-	-	-
19	53331299	A	T	Mxi1	ENSMUST00000003870.13	c.275-52A>T		intron_variant	1	-	-	-	-	-	-	-	-	-	-	-	-	-	-	-	-	-	-	-	-	-	-	-	-	-	-	-	-	-	-	-	-	-	-	-	-	-	-	-	-
19	53641837	G	A	Smc3	ENSMUST00000025930.9	c.3298-24G>A		intron_variant	1	-	-	-	-	-	-	-	-	-	-	-	-	-	-	-	-	-	-	-	-	-	-	-	-	-	-	-	-	-	-	-	-	-	-	-	-	-	0.1892 (14/74)	-	-
19	53813256	A	C	Rbm20	ENSMUST00000164202.7	c.194A>C	p.Lys65Thr	missense_variant	1	-	-	-	-	-	-	-	-	-	-	-	-	-	-	-	-	-	-	-	-	-	-	-	-	-	-	-	-	-	-	-	-	-	-	-	-	-	-	-	-
19	55268630	C	CT	Acsl5	ENSMUST00000043150.4	c.-29-4dupT		splice_region_variant&intron_variant	2	-	-	-	-	-	-	-	-	-	-	-	-	-	-	-	-	-	-	-	-	-	-	-	-	-	-	-	-	-	-	-	-	-	-	-	-	-	-	-	-
19	55268630	CT	C	Acsl5	ENSMUST00000043150.4	c.-29-4delT		splice_region_variant&intron_variant	1	-	-	-	-	-	-	-	-	-	-	-	-	-	-	-	-	-	-	-	-	-	-	-	-	-	-	-	-	-	-	-	-	-	-	-	-	-	-	-	-
19	55301792	C	CT	Zdhhc6	ENSMUST00000076891.5	c.1138+765dupA		intron_variant	2	-	-	-	-	-	-	-	-	-	-	-	-	-	-	-	-	-	-	-	-	-	-	-	-	-	-	-	-	-	-	-	-	-	-	-	-	-	-	-	-
19	55302635	G	A	Zdhhc6	ENSMUST00000076891.5	c.1092-31C>T		intron_variant	1	-	-	-	-	-	-	-	-	-	-	-	-	-	-	-	-	-	-	-	-	-	-	-	-	-	-	-	-	-	-	-	-	-	0.1299 (10/77)	-	-	-	-	-	-
19	56327178	C	T	Nrap	ENSMUST00000073536.12	c.4527+17G>A		intron_variant	1	-	-	-	-	-	-	-	-	-	-	-	-	-	-	-	-	-	-	-	-	-	-	-	-	-	-	-	-	-	-	-	-	-	-	-	-	-	-	-	-
19	56336499	C	T	Nrap	ENSMUST00000073536.12	c.3781G>A	p.Ala1261Thr	missense_variant	1	-	-	-	-	-	-	-	-	-	-	-	-	-	-	-	-	-	-	-	-	-	-	-	-	-	-	-	-	-	-	-	-	-	-	-	-	-	-	-	-
19	56531336	T	G	Dclre1a	ENSMUST00000182276.1	c.2864A>C	p.Lys955Thr	missense_variant	1	-	-	-	-	-	-	-	-	-	0.4444 (16/36)	-	-	-	-	-	-	-	-	-	-	-	-	-	-	-	-	-	-	-	-	-	-	-	-	-	-	-	-	-	-
19	59344875	G	A	Pdzd8	ENSMUST00000099274.2	c.713C>T	p.Thr238Ile	missense_variant	1	-	-	-	-	-	-	-	-	-	-	-	-	-	-	-	-	-	-	-	-	-	-	-	-	-	-	-	-	-	-	-	-	-	-	-	-	-	-	-	-
19	59935978	C	T	Rab11fip2	ENSMUST00000051996.12	c.893G>A	p.Gly298Glu	missense_variant	2	-	-	-	-	-	-	-	-	-	-	-	-	-	-	-	-	-	-	-	-	-	-	-	-	0.2581 (8/31)	-	-	-	-	-	-	0.1176 (16/136)	-	-	-	-	-	-	-	-
19	59937145	C	CT	Rab11fip2	ENSMUST00000051996.12	c.638dupA	p.Pro214fs	frameshift_variant	1	-	-	-	-	-	-	-	-	-	-	-	-	-	-	-	-	-	-	-	-	-	-	-	-	-	-	-	-	-	-	-	-	-	-	-	-	-	-	-	-
2	4937756	A	C	Phyh	ENSMUST00000027975.7	c.909A>C	p.Glu303Asp	missense_variant	2	-	-	-	-	-	-	-	-	-	-	-	-	-	-	-	-	0.17 (17/100)	-	-	-	-	-	-	-	-	-	-	-	-	-	-	-	-	-	-	-	-	-	-	-
2	5021230	T	C	Optn	ENSMUST00000027986.4	c.*29-2A>G		splice_acceptor_variant&intron_variant	1	-	-	-	-	-	-	-	-	-	-	-	-	-	-	-	-	-	-	-	-	-	-	-	-	-	-	-	-	-	-	-	-	-	-	-	-	-	-	-	-
2	5021299	T	C	Optn	ENSMUST00000027986.4	c.*28+24A>G		intron_variant	1	-	-	-	-	-	-	-	-	-	-	-	-	-	-	-	-	-	-	-	-	-	-	-	-	-	-	-	-	-	-	-	-	-	-	-	-	-	-	-	-
2	6040557	T	G	Upf2	ENSMUST00000060092.12	c.3365T>G	p.Leu1122Arg	missense_variant	1	-	-	-	-	-	-	-	-	-	0.5 (19/38)	-	-	-	-	-	-	-	-	-	-	-	-	-	-	-	-	-	-	-	-	-	-	-	-	-	-	-	-	-	-
2	6391043	A	G	Usp6nl	ENSMUST00000042503.8	c.74-12A>G		intron_variant	1	-	-	-	-	-	-	-	-	-	-	-	-	-	-	-	-	-	-	-	-	-	-	-	-	-	-	-	-	-	-	-	-	-	-	-	-	-	-	-	-
2	9914475	T	G	Gm13262	ENSMUST00000149014.1	n.1819T>G		non_coding_transcript_exon_variant	1	-	-	-	-	-	-	-	-	-	-	-	-	-	-	-	-	-	-	-	-	-	-	-	-	-	-	-	-	-	-	-	-	-	-	-	-	-	-	-	-
2	9952300	G	GT	Taf3	ENSMUST00000026888.10	c.1054dupA	p.Thr352fs	frameshift_variant	1	-	-	-	-	-	-	-	-	-	-	-	-	-	-	-	-	-	-	-	-	-	-	-	-	-	-	-	-	-	-	-	-	-	-	-	-	-	-	-	-
2	10096559	TG	T	Itih2	ENSMUST00000042290.13	c.2596delC	p.Gln866fs	frameshift_variant&splice_region_variant	1	-	-	-	-	-	-	-	-	-	-	-	-	-	-	-	-	-	-	-	-	-	-	-	-	-	-	-	-	-	-	-	-	-	-	-	-	-	-	-	-
2	10249274	G	A	Itih5	ENSMUST00000026886.7	c.2335G>A	p.Val779Met	missense_variant	2	-	-	-	-	-	-	-	-	-	-	-	-	-	-	-	-	-	-	-	-	-	-	-	-	-	-	-	-	-	-	-	-	-	-	-	-	-	-	-	-
2	13355687	G	C	Cubn	ENSMUST00000091436.6	c.5223C>G	p.Thr1741Thr	synonymous_variant	2	-	-	-	-	-	-	-	-	-	-	-	-	-	-	-	-	-	-	-	-	-	-	-	-	-	-	-	-	-	-	-	-	-	-	-	-	-	0.2558 (11/43)	-	-
2	16669860	C	A	Plxdc2	ENSMUST00000028081.12	c.1017C>A	p.Ser339Ser	synonymous_variant	1	-	-	-	-	-	-	-	-	-	-	-	-	-	-	-	-	-	-	-	-	-	-	-	-	-	-	-	-	-	-	-	-	-	-	-	-	-	-	-	-
2	18159406	C	T	Mllt10	ENSMUST00000028076.14	c.796-50C>T		intron_variant	1	-	-	-	-	-	-	-	-	0.1064 (5/47)	-	-	-	-	-	-	-	-	-	-	-	-	-	-	-	-	-	-	-	-	-	-	-	-	-	-	-	-	-	-	-
2	18675865	A	G	Commd3	ENSMUST00000061158.4	c.529-2A>G		splice_acceptor_variant&intron_variant	1	-	-	-	-	-	-	-	-	-	-	-	-	-	-	-	-	-	-	-	-	-	-	-	-	-	-	-	-	-	-	-	-	-	-	-	-	-	-	-	-
2	21826877	T	C	Gpr158	ENSMUST00000055946.7	c.2787T>C	p.Ala929Ala	synonymous_variant	1	-	-	-	-	-	-	-	-	-	-	-	-	-	-	-	-	-	-	-	-	-	-	-	-	-	-	-	-	-	-	-	-	-	-	-	-	-	-	-	-
2	22577754	G	C	Myo3a	ENSMUST00000044749.13	c.3833G>C	p.Cys1278Ser	missense_variant	1	-	-	-	-	-	-	-	-	-	-	-	-	-	-	-	-	-	-	-	-	-	-	-	-	-	-	-	-	-	-	-	-	-	-	-	-	-	-	-	-
2	22866927	A	C	Apbb1ip	ENSMUST00000014290.14	c.1199A>C	p.Lys400Thr	missense_variant	1	-	-	-	-	-	-	-	-	-	0.2182 (36/165)	-	-	-	-	-	-	-	-	-	-	-	-	-	-	-	-	-	-	-	-	-	-	-	-	-	-	-	-	-	-
2	23168362	G	C	Yme1l1	ENSMUST00000028117.3	c.505G>C	p.Glu169Gln	missense_variant	1	-	-	-	-	-	-	-	-	-	-	-	-	-	-	-	-	-	-	-	-	-	-	-	-	-	-	-	0.3433 (46/134)	-	-	-	-	-	-	-	-	-	-	-	-
2	25399341	A	C	Entpd2	ENSMUST00000028328.2	c.834A>C	p.Glu278Asp	missense_variant	2	-	-	-	-	-	-	-	-	-	-	-	-	-	-	-	-	-	-	-	-	-	-	-	-	-	-	-	-	-	-	-	-	-	-	-	-	-	-	-	-
2	25701136	C	A	Obp2a	ENSMUST00000077667.3	c.279C>A	p.Gly93Gly	synonymous_variant	1	-	-	-	-	-	-	-	-	-	-	-	-	-	-	-	-	-	-	-	-	-	-	-	-	-	-	-	-	-	-	-	-	-	-	-	-	-	-	-	-
2	25707361	C	A	Bmyc	ENSMUST00000061483.8	c.436C>A	p.Arg146Ser	missense_variant	1	-	-	-	-	-	-	-	-	-	-	-	-	-	-	-	-	-	-	-	-	-	-	-	-	-	-	-	-	-	-	-	-	-	-	-	-	-	-	-	-
2	25707361	C	A	A230005M16Rik	ENSMUST00000137661.1	n.100-6G>T		splice_region_variant&intron_variant	1	-	-	-	-	-	-	-	-	-	-	-	-	-	-	-	-	-	-	-	-	-	-	-	-	-	-	-	-	-	-	-	-	-	-	-	-	-	-	-	-
2	25707530	C	CT	Bmyc	ENSMUST00000061483.8	c.*98dupT		3_prime_UTR_variant	1	-	-	-	-	-	-	-	-	-	-	-	-	-	-	-	0.1429 (5/35)	-	-	-	-	-	-	-	-	-	-	-	-	-	-	-	-	-	-	-	-	-	-	-	-
2	25707530	C	CT	A230005M16Rik	ENSMUST00000137661.1	n.100-176dupA		intron_variant	1	-	-	-	-	-	-	-	-	-	-	-	-	-	-	-	0.1429 (5/35)	-	-	-	-	-	-	-	-	-	-	-	-	-	-	-	-	-	-	-	-	-	-	-	-
2	26408253	C	G	Inpp5e	ENSMUST00000145701.7	c.335G>C	p.Gly112Ala	missense_variant	1	-	-	-	-	-	-	-	-	-	-	-	-	-	-	-	-	-	-	-	-	-	-	-	-	-	-	-	-	-	-	-	-	-	-	-	-	-	-	-	-
2	26464927	G	C	Notch1	ENSMUST00000028288.4	c.5487C>G	p.Asp1829Glu	missense_variant	1	-	-	-	-	-	-	-	-	-	-	-	-	-	-	-	-	-	-	-	-	-	-	-	-	-	-	-	-	-	-	-	-	-	-	-	-	-	-	-	-
2	28454207	G	GT	Ppp1r26	ENSMUST00000040324.13	c.*362dupT		3_prime_UTR_variant	1	-	-	-	-	-	-	-	-	-	-	-	-	-	-	-	-	-	-	-	-	-	-	-	-	0.1379 (4/29)	-	-	-	-	-	-	-	-	-	-	-	-	-	-	-
2	29069942	G	GA	Ttf1	ENSMUST00000100237.3	c.1568dupA	p.Asn523fs	frameshift_variant	2	-	-	-	-	-	-	-	-	-	-	-	-	-	-	-	-	-	-	-	-	-	-	-	-	-	-	-	-	-	-	-	-	-	-	0.25 (4/16)	-	-	-	-	-
2	29207579	T	G	Ntng2	ENSMUST00000048455.8	c.869A>C	p.Asn290Thr	missense_variant	1	-	-	-	-	-	-	-	-	-	-	-	-	-	-	-	-	-	-	-	-	-	-	-	-	-	-	-	-	-	-	-	-	-	-	-	-	-	-	-	-
2	29872821	G	C	Cercam	ENSMUST00000047521.6	c.566G>C	p.Arg189Pro	missense_variant	1	0.1842 (7/38)	-	-	-	-	-	-	-	-	-	-	-	-	-	-	-	-	-	-	-	-	-	-	-	-	-	-	-	-	-	-	-	-	-	-	-	-	-	-	-
2	29986387	T	G	Sptan1	ENSMUST00000129241.2	c.786-8T>G		splice_region_variant&intron_variant	1	-	-	-	-	-	-	-	-	-	-	-	-	-	-	-	-	-	-	-	-	-	-	-	-	-	-	-	-	-	-	-	-	-	-	-	-	-	-	-	-
2	30029999	G	A	Sptan1	ENSMUST00000129241.2	c.6826-1G>A		splice_acceptor_variant&intron_variant	1	-	-	-	-	-	-	-	-	-	-	-	-	-	-	-	0.3871 (12/31)	-	-	-	-	-	-	-	-	-	-	-	-	-	-	-	-	-	-	-	-	-	-	-	-
2	30255468	A	C	Lrrc8a	ENSMUST00000095078.2	c.293A>C	p.Lys98Thr	missense_variant	1	-	-	-	-	-	-	-	-	-	0.4167 (10/24)	-	-	-	-	-	-	-	-	-	-	-	-	-	-	-	-	-	-	-	-	-	-	-	-	-	-	-	-	-	-
2	30255468	A	C	Gm28035	ENSMUST00000139454.2	c.293A>C	p.Lys98Thr	missense_variant	1	-	-	-	-	-	-	-	-	-	0.4167 (10/24)	-	-	-	-	-	-	-	-	-	-	-	-	-	-	-	-	-	-	-	-	-	-	-	-	-	-	-	-	-	-
2	30413129	A	G	Crat	ENSMUST00000028207.12	c.145T>C	p.Tyr49His	missense_variant	3	-	-	-	-	-	-	-	-	-	0.1358 (11/81)	-	-	-	-	-	-	-	-	-	-	-	-	-	-	-	-	-	-	-	-	-	-	-	-	-	-	-	-	-	-
2	30903209	G	T	Ptges	ENSMUST00000102852.5	c.10C>A	p.Pro4Thr	missense_variant	1	-	-	-	-	-	-	-	-	-	-	-	-	-	-	-	-	-	-	-	-	-	-	-	-	-	-	-	-	-	-	-	-	-	-	-	-	-	-	-	-
2	30903214	G	A	Ptges	ENSMUST00000102852.5	c.5C>T	p.Pro2Leu	missense_variant	1	-	-	-	-	-	-	-	-	-	-	-	-	-	-	-	-	-	-	-	-	-	-	-	-	-	-	-	-	-	-	-	-	-	-	-	-	-	-	-	-
2	30903229	C	A	Ptges	ENSMUST00000102852.5	c.-11G>T		5_prime_UTR_premature_start_codon_gain_variant&5_prime_UTR_variant	1	-	-	-	-	-	-	-	-	-	-	-	-	-	-	-	-	-	-	-	-	-	-	-	-	-	-	-	-	-	-	-	-	-	-	-	-	-	-	-	-
2	30953002	C	A	Tor1b	ENSMUST00000028199.11	c.-23C>A		5_prime_UTR_variant	1	-	-	-	-	-	-	-	-	-	-	-	-	-	-	-	-	-	-	-	-	-	-	-	-	-	-	-	-	-	-	-	-	-	-	-	-	-	-	-	-
2	31792412	G	C	Abl1	ENSMUST00000075759.12	c.1317G>C	p.Ser439Ser	synonymous_variant	2	-	-	-	-	-	-	-	-	-	-	-	-	-	-	-	-	-	-	-	-	-	-	-	-	-	-	-	-	-	-	-	-	-	-	-	0.274 (20/73)	-	-	-	-
2	31998029	G	C	Nup214	ENSMUST00000065398.12	c.2001G>C	p.Val667Val	synonymous_variant	1	-	-	-	-	-	-	-	-	-	-	-	-	-	-	-	-	-	-	-	-	-	-	-	-	-	-	-	-	-	-	-	-	-	-	-	-	-	-	-	-
2	32323432	G	C	Dnm1	ENSMUST00000139624.7	c.1535C>G	p.Ser512*	stop_gained	4	-	-	-	-	-	-	-	-	-	-	-	-	-	-	-	-	-	-	-	-	-	-	-	-	-	-	-	-	-	-	-	-	-	-	-	-	-	-	-	-
2	35728079	G	T	Dab2ip	ENSMUST00000091010.11	c.3424G>T	p.Asp1142Tyr	missense_variant	1	-	-	-	-	-	-	-	-	-	-	-	-	-	-	-	-	0.125 (4/32)	-	-	-	-	-	-	-	-	-	-	-	-	-	-	-	-	-	-	-	-	-	-	-
2	37411188	A	AT	Rc3h2	ENSMUST00000100143.9	c.300dupA	p.Cys101fs	frameshift_variant	1	-	-	-	-	-	-	-	-	-	-	-	-	-	-	-	-	-	-	-	-	-	-	-	-	-	-	-	-	-	-	-	-	-	-	-	-	-	-	-	-
2	37793359	C	T	Crb2	ENSMUST00000050372.9	c.2872C>T	p.Leu958Leu	synonymous_variant	1	-	-	-	-	-	-	-	-	-	-	-	-	-	-	-	-	-	-	-	-	-	-	-	-	-	-	-	-	-	-	-	-	-	-	-	-	-	-	0.3462 (9/26)	-
2	40801473	T	G	Lrp1b	ENSMUST00000052550.12	c.10333A>C	p.Thr3445Pro	missense_variant	1	-	-	-	-	-	-	-	-	-	-	-	-	-	-	-	-	-	-	-	-	-	-	-	-	-	-	-	-	-	-	-	-	-	-	-	-	-	-	-	-
2	41112249	G	C	Lrp1b	ENSMUST00000052550.12	c.6427+10C>G		intron_variant	1	-	-	-	-	-	-	-	-	-	-	-	-	-	-	-	-	-	-	-	-	-	-	-	-	-	-	-	-	-	-	-	-	-	-	-	-	-	-	-	-
2	43562990	G	T	Kynu	ENSMUST00000028223.8	c.24G>T	p.Glu8Asp	missense_variant	1	-	-	-	-	-	-	-	-	-	-	-	-	-	-	-	-	-	-	-	-	0.1212 (8/66)	-	-	-	-	-	-	-	-	-	-	-	-	-	-	-	-	-	-	-
2	44996570	T	A	Zeb2	ENSMUST00000028229.12	c.2474A>T	p.Asn825Ile	missense_variant	1	-	-	-	-	-	-	-	-	-	-	-	-	-	-	-	-	-	-	-	-	-	-	-	-	-	-	-	-	-	-	-	-	-	-	-	-	-	-	-	-
2	52160674	C	A	Neb	ENSMUST00000036934.11	c.19971G>T	p.Thr6657Thr	synonymous_variant	1	-	-	-	-	-	-	-	-	-	-	-	-	-	-	-	-	-	-	-	-	-	-	-	-	-	-	-	-	-	-	-	-	-	-	-	-	-	-	-	-
2	52707885	C	G	Stam2	ENSMUST00000102759.7	c.970+33G>C		intron_variant	1	-	-	-	-	-	-	-	-	-	-	-	-	-	-	-	-	-	-	-	-	-	-	-	-	-	-	-	-	-	-	-	-	-	-	-	-	-	-	-	-
2	59820172	G	C	Tanc1	ENSMUST00000037526.10	c.3157-35G>C		intron_variant	1	0.2396 (23/96)	-	-	-	-	-	-	-	-	-	-	-	-	-	-	-	-	-	-	-	-	-	-	-	-	-	-	-	-	-	-	-	-	-	-	-	-	-	-	-
2	60447367	A	T	Pla2r1	ENSMUST00000112525.4	c.2595+16T>A		intron_variant	1	-	-	-	-	-	-	-	-	-	-	-	-	-	-	-	-	-	-	-	-	-	-	-	-	-	-	-	-	-	-	-	-	-	-	-	-	-	-	-	-
2	61649989	C	T	Tank	ENSMUST00000078074.8	c.871C>T	p.Pro291Ser	missense_variant	1	-	-	-	-	-	-	-	-	-	-	0.484 (106/219)	-	-	-	-	-	-	-	-	-	-	-	-	-	-	-	-	-	-	-	-	-	-	-	-	-	-	-	-	-
2	62304704	C	T	Slc4a10	ENSMUST00000112480.2	c.3088C>T	p.Arg1030Trp	missense_variant	1	-	-	-	-	-	-	-	-	-	-	-	-	-	-	-	-	-	-	-	-	-	-	-	-	-	-	-	-	-	-	-	-	-	-	-	-	-	-	-	-
2	65097643	T	C	Cobll1	ENSMUST00000112429.8	c.3452A>G	p.Asp1151Gly	missense_variant	1	0.2558 (11/43)	-	-	-	-	-	-	-	-	-	-	-	-	-	-	-	-	-	-	-	-	-	-	-	-	-	-	-	-	-	-	-	-	-	-	-	-	-	-	-
2	67519237	C	A	Xirp2	ENSMUST00000028410.3	c.9759C>A	p.Asp3253Glu	missense_variant&splice_region_variant	1	-	-	-	-	-	-	-	-	-	-	-	-	-	-	-	-	-	-	-	-	-	-	-	-	-	-	-	-	-	-	-	-	-	-	-	-	-	-	-	-
2	68119608	G	GT	B3galt1	ENSMUST00000042456.3	c.*695dupT		3_prime_UTR_variant	1	-	-	-	-	-	-	-	-	-	-	-	-	-	-	-	-	-	-	-	-	-	-	-	-	-	-	-	-	-	-	-	-	-	-	-	-	-	-	-	-
2	69277796	T	C	Abcb11	ENSMUST00000102709.7	c.2156A>G	p.His719Arg	missense_variant	1	-	-	-	-	-	-	-	-	-	-	-	-	-	-	-	-	-	-	-	-	-	-	-	-	-	-	-	-	-	-	-	-	-	-	-	-	-	-	-	-
2	69795743	T	G	Phospho2	ENSMUST00000028494.8	c.242T>G	p.Leu81Arg	missense_variant	1	-	-	-	-	-	-	-	-	-	0.5 (15/30)	-	-	-	-	-	-	-	-	-	-	-	-	-	-	-	-	-	-	-	-	-	-	-	-	-	-	-	-	-	-
2	69870826	T	C	Ssb	ENSMUST00000090852.10	c.1152T>C	p.Arg384Arg	synonymous_variant	4	-	-	-	-	-	-	-	-	-	-	-	-	-	-	-	-	-	-	-	-	-	-	-	-	-	-	-	-	-	-	-	-	-	-	-	-	-	-	-	-
2	73846239	C	G	Atf2	ENSMUST00000055833.11	c.530G>C	p.Ser177Thr	missense_variant	1	-	-	-	-	-	-	-	-	-	-	-	-	-	-	-	-	-	-	-	-	-	-	-	-	-	-	-	-	-	-	-	0.1711 (13/76)	-	-	-	-	-	-	-	-
2	73900453	AT	A	Gm10822	ENSMUST00000181596.1	n.1933delT		non_coding_transcript_exon_variant	1	-	-	-	-	-	-	-	-	-	-	-	-	-	0.1538 (10/65)	-	-	-	-	-	-	-	-	-	-	-	-	-	-	-	-	-	-	-	-	-	-	-	-	-	-
2	76636770	C	G	Prkra	ENSMUST00000002808.6	c.609+25G>C		intron_variant	1	-	-	-	-	-	-	-	-	-	-	-	-	-	-	-	-	-	-	-	-	-	-	-	-	-	-	-	-	-	-	-	-	-	-	-	-	-	-	-	-
2	76705686	G	C	Ttn	ENSMUST00000099981.8	c.105327C>G	p.Leu35109Leu	synonymous_variant	1	-	-	-	-	-	-	-	-	-	-	-	-	-	-	-	-	-	-	-	-	-	-	-	-	-	-	-	-	-	-	-	-	-	-	-	-	-	-	-	-
2	76749743	G	T	Ttn	ENSMUST00000099981.8	c.70805C>A	p.Ala23602Glu	missense_variant	1	-	-	-	-	-	-	-	-	-	-	-	-	-	-	-	-	-	-	-	-	-	-	-	-	-	-	-	-	-	-	-	-	-	-	-	-	-	-	-	-
2	76749743	G	T	Gm13938	ENSMUST00000156809.1	n.73-24697G>T		intron_variant	1	-	-	-	-	-	-	-	-	-	-	-	-	-	-	-	-	-	-	-	-	-	-	-	-	-	-	-	-	-	-	-	-	-	-	-	-	-	-	-	-
2	76749946	C	T	Ttn	ENSMUST00000099981.8	c.70602G>A	p.Pro23534Pro	synonymous_variant	1	-	-	-	-	-	-	-	-	-	-	-	-	-	-	-	-	-	-	-	-	-	-	-	-	-	-	-	-	-	-	-	-	-	-	-	-	-	-	-	-
2	76749946	C	T	Gm13938	ENSMUST00000156809.1	n.73-24494C>T		intron_variant	1	-	-	-	-	-	-	-	-	-	-	-	-	-	-	-	-	-	-	-	-	-	-	-	-	-	-	-	-	-	-	-	-	-	-	-	-	-	-	-	-
2	76751969	T	G	Ttn	ENSMUST00000099981.8	c.68579A>C	p.Tyr22860Ser	missense_variant	1	-	-	-	-	-	-	-	-	-	-	-	-	-	-	-	-	-	-	-	-	-	-	-	-	-	-	-	-	-	-	-	-	-	0.2324 (43/185)	-	-	-	-	-	-
2	76751969	T	G	Gm13938	ENSMUST00000156809.1	n.73-22471T>G		intron_variant	1	-	-	-	-	-	-	-	-	-	-	-	-	-	-	-	-	-	-	-	-	-	-	-	-	-	-	-	-	-	-	-	-	-	0.2324 (43/185)	-	-	-	-	-	-
2	77415796	A	AT	Zfp385b	ENSMUST00000090766.11	c.885dupA	p.Leu296fs	frameshift_variant	1	-	-	-	-	-	-	-	-	-	-	-	-	-	-	-	-	-	-	-	-	-	-	-	-	-	-	-	-	-	-	-	-	-	-	-	-	-	-	-	-
2	79913821	A	AT	Pde1a	ENSMUST00000102653.7	c.216-7650dupA		intron_variant	1	-	-	-	-	-	-	-	-	-	-	-	-	-	-	-	-	-	-	-	-	-	-	-	-	-	-	-	-	-	-	-	-	-	-	-	-	-	-	-	-
2	80553336	A	C	Nckap1	ENSMUST00000111760.2	c.501T>G	p.Asn167Lys	missense_variant	1	-	-	-	-	-	-	-	-	-	-	-	-	-	-	-	-	-	-	-	-	-	-	-	-	-	-	-	-	-	-	-	-	-	0.102 (15/147)	-	-	-	-	-	-
2	84771576	A	G	Serping1	ENSMUST00000023994.9	c.566-17T>C		intron_variant	1	-	-	-	-	-	-	-	-	-	-	-	-	-	-	-	-	-	-	-	-	-	-	-	-	-	-	-	-	-	-	-	-	-	-	-	-	-	-	-	-
2	85052468	A	T	Tnks1bp1	ENSMUST00000111605.8	c.638A>T	p.Lys213Met	missense_variant	1	-	-	-	-	-	-	-	-	-	-	-	-	-	-	-	-	-	-	-	-	-	-	-	-	-	-	-	-	-	-	-	-	-	-	0.1 (8/80)	-	-	-	-	-
2	85139861	C	CT	Aplnr	ENSMUST00000057019.8	c.*2107dupT		3_prime_UTR_variant	1	-	-	-	-	-	-	-	-	-	-	-	-	-	-	-	-	-	-	-	-	-	-	-	-	-	-	-	-	-	-	-	-	-	-	-	-	-	-	-	-
2	86122118	A	G	Olfr1038-ps	ENSMUST00000149775.1	n.194A>G		non_coding_transcript_exon_variant	1	-	-	-	-	-	-	-	-	-	-	-	-	-	-	-	-	-	-	-	-	-	-	-	-	-	-	-	-	-	-	-	-	-	-	-	-	-	-	-	-
2	86228535	C	G	Olfr1047	ENSMUST00000099901.1	c.435G>C	p.Val145Val	synonymous_variant	1	-	-	-	-	-	-	-	-	0.3548 (55/155)	-	-	-	-	-	-	-	-	-	-	-	-	-	-	-	-	-	-	-	-	-	-	-	-	-	-	-	-	-	-	-
2	87783332	C	T	Olfr152	ENSMUST00000090709.1	c.797C>T	p.Pro266Leu	missense_variant	1	-	-	-	-	-	-	-	-	-	-	-	-	-	-	-	-	-	-	-	-	-	-	-	-	-	-	-	-	-	-	-	-	-	-	-	-	-	-	-	-
2	87802938	G	T	Olfr1143	ENSMUST00000090708.1	c.548G>T	p.Cys183Phe	missense_variant	2	-	-	-	-	-	-	-	-	-	-	-	-	-	-	-	-	-	-	-	-	-	-	-	-	-	-	-	-	-	-	-	-	-	-	-	-	-	-	-	-
2	88423119	T	A	Olfr1181	ENSMUST00000099823.1	c.905A>T	p.Gln302Leu	missense_variant	1	-	-	-	-	-	-	-	-	-	-	-	-	-	-	-	-	-	-	-	-	-	-	-	-	-	-	-	-	-	-	-	-	-	-	-	-	-	0.3191 (75/235)	-	-
2	89439995	A	C	Olfr1240	ENSMUST00000187363.1	c.283T>G	p.Cys95Gly	missense_variant	1	-	-	-	-	-	-	-	-	-	-	-	-	-	-	-	-	-	-	-	-	-	-	-	-	-	-	-	-	-	-	-	-	-	-	-	-	-	-	-	-
2	90905684	A	C	Kbtbd4	ENSMUST00000111464.7	c.38A>C	p.Lys13Thr	missense_variant	1	-	-	-	-	-	-	-	-	-	-	-	-	-	-	-	-	-	-	-	-	-	-	-	-	-	-	-	-	-	-	-	-	-	-	-	-	-	-	-	-
2	91263831	A	G	Pacsin3	ENSMUST00000028694.11	c.1104A>G	p.Val368Val	synonymous_variant	1	-	-	-	-	-	-	-	-	-	-	-	-	-	-	-	-	-	-	-	-	-	-	-	-	-	0.1277 (18/141)	-	-	-	-	-	-	-	-	-	-	-	-	-	-
2	91944088	C	T	Dgkz	ENSMUST00000111303.1	c.960G>A	p.Ala320Ala	synonymous_variant	2	-	-	-	-	-	-	-	-	-	-	-	-	-	-	-	-	-	-	-	-	-	-	-	-	-	-	-	-	-	-	-	-	-	-	-	-	-	-	-	-
2	91946438	A	G	Gm9821	ENSMUST00000178895.1	c.*422A>G		3_prime_UTR_variant	2	-	-	-	-	-	-	-	-	-	-	-	-	-	-	-	-	-	-	-	-	-	-	-	-	-	-	-	-	-	-	-	-	-	-	-	-	-	-	-	-
2	91946438	A	G	Dgkz	ENSMUST00000111303.1	c.-8-514T>C		intron_variant	2	-	-	-	-	-	-	-	-	-	-	-	-	-	-	-	-	-	-	-	-	-	-	-	-	-	-	-	-	-	-	-	-	-	-	-	-	-	-	-	-
2	91986222	G	A	Creb3l1	ENSMUST00000028663.4	c.1197C>T	p.Ser399Ser	synonymous_variant	1	-	-	-	-	-	-	-	-	-	-	-	-	-	-	-	-	-	0.1042 (10/96)	-	-	-	-	-	-	-	-	-	-	-	-	-	-	-	-	-	-	-	-	-	-
2	92328390	T	G	Phf21a	ENSMUST00000090586.11	c.715T>G	p.Phe239Val	missense_variant	1	-	-	-	-	-	-	-	-	-	-	-	-	-	-	-	-	-	-	-	-	-	-	-	-	-	-	-	-	-	-	-	-	-	-	0.1111 (5/45)	-	-	-	-	-
2	93420272	G	C	Cd82	ENSMUST00000028644.10	c.691C>G	p.Leu231Val	missense_variant	1	-	-	-	-	-	-	-	-	-	-	-	-	-	-	-	-	-	-	-	-	-	-	-	-	-	-	-	-	-	-	-	-	-	-	-	-	-	-	-	-
2	101899929	A	T	Commd9	ENSMUST00000028584.7	c.413A>T	p.Asn138Ile	missense_variant	2	-	-	-	-	-	-	-	-	-	-	-	-	-	-	-	-	-	-	-	-	-	-	-	-	-	-	-	-	-	-	-	-	-	-	-	-	-	-	-	-
2	103754185	A	G	Nat10	ENSMUST00000028608.12	c.246T>C	p.Ser82Ser	synonymous_variant	1	-	-	-	-	-	-	-	-	-	-	-	-	-	-	-	-	-	-	-	-	-	-	-	-	-	-	-	-	-	-	-	-	-	-	-	-	-	-	-	-
2	106873677	T	C	Mpped2-Gm13901	ENSMUSG00000016386-ENSMUSG00000085530	n.106873677T>C		intergenic_region	1	-	-	-	-	-	-	-	-	-	-	-	-	-	-	-	-	-	-	-	-	-	-	-	-	-	-	-	-	-	-	-	-	-	-	-	-	-	-	-	-
2	107295639	A	C	Kcna4	ENSMUST00000037012.2	c.717A>C	p.Gly239Gly	synonymous_variant	1	-	-	-	-	-	-	-	-	-	-	-	-	-	-	-	-	-	-	-	-	-	-	-	-	-	-	-	-	-	-	-	-	-	-	-	-	-	-	-	-
2	107295644	G	T	Kcna4	ENSMUST00000037012.2	c.722G>T	p.Arg241Leu	missense_variant	1	-	-	-	-	-	-	-	-	-	-	-	-	-	-	-	-	-	-	-	-	-	-	-	-	-	-	-	-	-	-	-	-	-	-	-	-	-	-	-	-
2	111449247	C	T	Olfr1287	ENSMUST00000075390.1	c.106C>T	p.Leu36Leu	synonymous_variant	1	-	-	-	-	-	-	-	-	-	-	-	-	-	-	-	-	-	-	-	-	-	-	-	-	-	-	-	-	-	-	-	-	-	-	-	-	-	-	-	-
2	111490137	G	C	Olfr1290	ENSMUST00000099616.1	c.20C>G	p.Thr7Ser	missense_variant	1	-	-	-	-	-	-	-	-	-	-	-	-	-	-	-	-	-	-	-	-	-	-	-	-	-	-	-	-	-	-	-	-	-	-	-	-	-	-	-	-
2	111621817	A	T	Olfr1297	ENSMUST00000099612.1	c.256T>A	p.Phe86Ile	missense_variant	1	-	-	-	-	-	-	-	-	-	-	-	-	-	-	-	-	-	-	-	-	-	-	-	-	-	-	-	-	-	-	-	-	-	-	-	-	-	-	-	-
2	112863704	C	T	Ryr3	ENSMUST00000091818.5	c.3087+33G>A		intron_variant	1	-	-	-	-	-	-	-	-	-	-	-	-	-	-	-	-	-	-	-	-	-	-	-	-	-	-	-	-	-	-	-	-	-	-	-	-	-	-	-	-
2	113750039	G	T	Grem1	ENSMUST00000099575.3	c.116C>A	p.Ala39Asp	missense_variant	1	-	-	-	-	-	-	-	-	-	-	-	-	-	-	-	-	-	-	-	-	-	-	-	-	-	-	-	-	-	-	-	-	-	-	-	-	-	-	-	-
2	118120037	T	G	Thbs1	ENSMUST00000039559.8	c.2148+2T>G		splice_donor_variant&intron_variant	1	-	-	-	-	-	-	-	-	-	-	-	-	-	-	-	-	-	-	-	-	-	-	-	-	-	-	-	-	-	-	-	-	-	-	-	-	-	-	-	-
2	119293495	G	A	Vps18	ENSMUST00000037280.4	c.902G>A	p.Arg301His	missense_variant	1	-	-	-	-	-	-	-	-	-	-	-	-	-	-	-	-	-	-	-	0.3438 (11/32)	-	-	-	-	-	-	-	-	-	-	-	-	-	-	-	-	-	-	-	-
2	119802298	T	A	Tyro3	ENSMUST00000028763.9	c.298T>A	p.Ser100Thr	missense_variant	1	-	-	-	-	-	-	-	-	-	-	-	-	-	-	-	-	-	-	-	-	-	-	-	-	-	-	-	-	-	-	-	-	-	-	-	-	-	-	-	-
2	120035260	T	C	Gm28042	ENSMUST00000129685.7	c.977T>C	p.Val326Ala	missense_variant	1	-	-	-	-	-	-	-	-	-	-	-	-	-	0.1136 (5/44)	-	-	-	-	-	-	-	-	-	-	-	-	-	-	-	-	-	-	-	-	-	-	-	-	-	-
2	120035260	T	C	Pla2g4b	ENSMUST00000126150.1	c.308T>C	p.Val103Ala	missense_variant	1	-	-	-	-	-	-	-	-	-	-	-	-	-	0.1136 (5/44)	-	-	-	-	-	-	-	-	-	-	-	-	-	-	-	-	-	-	-	-	-	-	-	-	-	-
2	120745591	C	CA	Ttbk2	ENSMUST00000028740.10	c.2903dupT	p.Leu968fs	frameshift_variant	1	-	-	-	-	-	-	-	-	-	-	-	-	-	-	-	-	-	-	-	-	-	-	-	-	0.1724 (5/29)	-	-	-	-	-	-	-	-	-	-	-	-	-	-	-
2	120745591	C	CA	Cdan1	ENSMUSG00000027284	n.120745592dupT		intragenic_variant	1	-	-	-	-	-	-	-	-	-	-	-	-	-	-	-	-	-	-	-	-	-	-	-	-	0.1724 (5/29)	-	-	-	-	-	-	-	-	-	-	-	-	-	-	-
2	121215689	T	A	Trp53bp1	ENSMUST00000110648.7	c.3629A>T	p.Asp1210Val	missense_variant	1	-	-	-	-	-	-	-	-	-	-	-	-	-	-	-	-	-	-	-	-	-	-	-	-	-	-	-	-	-	-	-	-	-	-	-	-	0.1333 (4/30)	-	-	-
2	121301818	T	G	Map1a	ENSMUST00000094639.9	c.3114T>G	p.Thr1038Thr	synonymous_variant	2	-	-	-	-	-	-	-	-	-	-	-	-	-	-	-	-	-	-	-	-	-	-	-	-	-	-	-	-	-	-	-	-	-	-	-	-	-	-	-	-
2	121337506	T	A	Ppip5k1	ENSMUST00000052029.9	c.2265A>T	p.Gln755His	missense_variant	1	-	-	-	-	-	-	-	-	-	-	-	-	-	-	-	-	-	-	-	-	-	-	-	-	-	-	-	-	-	-	-	-	-	-	-	-	-	-	-	-
2	121370799	T	C	Strc	ENSMUST00000038389.14	c.3814A>G	p.Arg1272Gly	missense_variant	1	-	-	-	-	-	-	-	-	-	-	-	-	-	-	-	-	-	-	-	-	-	-	-	-	-	-	-	-	-	-	-	-	-	-	-	-	-	-	-	-
2	122246472	T	C	Sord	ENSMUST00000110551.3	c.67-10T>C		intron_variant	1	-	-	-	-	-	-	-	-	-	-	-	-	-	-	-	-	-	-	-	-	-	-	-	-	-	-	-	-	-	-	-	-	-	0.1923 (25/130)	-	-	-	-	-	-
2	122809356	C	A	Sqrdl	ENSMUST00000005953.10	c.*18C>A		3_prime_UTR_variant	1	-	-	-	-	-	-	-	-	-	-	-	-	-	-	-	-	-	-	-	-	-	-	-	-	-	-	-	-	-	-	-	-	-	-	-	-	-	-	-	-
2	125154216	C	CT	Slc12a1	ENSMUST00000028630.8	c.288_289insT	p.Met97fs	frameshift_variant	1	-	-	-	-	-	-	-	-	-	-	-	-	-	-	-	-	-	-	-	-	-	-	-	-	-	-	-	-	-	-	-	-	-	-	-	-	-	-	-	-
2	125477564	G	A	Fbn1	ENSMUST00000028633.12	c.279C>T	p.Phe93Phe	synonymous_variant	1	-	-	-	-	-	-	-	-	-	-	-	-	-	-	-	-	-	-	-	-	-	-	-	-	-	-	-	-	-	-	-	-	-	-	-	-	-	-	-	-
2	126089626	TTC	T	Fgf7	ENSMUST00000064794.13	c.*106_*107delTC		3_prime_UTR_variant	1	-	-	0.1667 (5/30)	-	-	-	-	-	-	-	-	-	-	-	-	-	-	-	-	-	-	-	-	-	-	-	-	-	-	-	-	-	-	-	-	-	-	-	-	-
2	126089626	TTC	T	Fam227b	ENSMUST00000110446.8	c.976+11272_976+11273delGA		intron_variant	1	-	-	0.1667 (5/30)	-	-	-	-	-	-	-	-	-	-	-	-	-	-	-	-	-	-	-	-	-	-	-	-	-	-	-	-	-	-	-	-	-	-	-	-	-
2	126378784	C	T	Atp8b4	ENSMUST00000040128.11	c.1693G>A	p.Asp565Asn	missense_variant	1	-	-	-	-	-	-	-	-	-	-	-	-	-	-	-	-	-	-	-	-	-	-	-	-	-	-	-	-	-	-	-	-	-	-	-	-	-	-	-	-
2	126754982	A	C	Usp8	ENSMUST00000110416.2	c.2711A>C	p.Lys904Thr	missense_variant	3	-	-	-	-	-	-	-	-	-	-	-	-	-	-	-	-	-	-	-	-	-	-	-	-	-	-	-	-	-	-	-	-	-	-	-	-	-	-	-	-
2	126754982	A	C	Usp50	ENSMUSG00000027364	n.126754982T>G		intragenic_variant	3	-	-	-	-	-	-	-	-	-	-	-	-	-	-	-	-	-	-	-	-	-	-	-	-	-	-	-	-	-	-	-	-	-	-	-	-	-	-	-	-
2	127187354	G	C	1810024B03Rik	ENSMUST00000056146.1	c.-77C>G		5_prime_UTR_variant	1	-	-	-	-	-	-	-	-	-	-	-	-	-	-	-	-	-	-	-	-	-	-	-	-	-	-	-	-	-	-	-	-	-	-	-	-	-	0.268 (26/97)	-	-
2	127537077	T	A	Prom2	ENSMUST00000028855.13	c.1156A>T	p.Arg386Trp	missense_variant	1	-	-	-	-	-	-	-	-	-	-	-	-	-	-	-	-	-	-	-	-	-	-	-	-	-	-	-	-	-	-	-	-	-	-	-	-	-	-	-	-
2	127638594	C	T	Mal	ENSMUST00000028854.14	c.382G>A	p.Ala128Thr	missense_variant	1	-	-	-	-	-	-	-	-	-	-	-	-	-	-	-	-	-	-	-	-	-	-	-	-	-	-	-	-	-	-	-	-	-	-	-	-	-	-	-	-
2	128075824	T	A	Acoxl	ENSMUST00000028859.7	c.1450-23T>A		intron_variant	1	-	-	-	-	-	-	-	-	-	-	-	-	-	-	-	-	-	-	-	-	-	-	-	-	-	-	-	-	-	-	-	-	-	-	-	-	-	-	-	-
2	128423814	TC	T	Gm14005	ENSMUST00000151427.1	n.256+5279delG		intron_variant	1	-	-	-	-	-	-	-	-	-	-	-	-	-	-	-	-	-	-	-	-	-	-	-	-	-	-	-	-	-	-	-	-	-	-	-	-	-	-	-	-
2	128423814	TC	T	Gm14010	ENSMUST00000131961.1	n.136+26delC		intron_variant	1	-	-	-	-	-	-	-	-	-	-	-	-	-	-	-	-	-	-	-	-	-	-	-	-	-	-	-	-	-	-	-	-	-	-	-	-	-	-	-	-
2	128794409	T	G	Mertk	ENSMUST00000014505.4	c.2335-33T>G		intron_variant	1	-	-	-	-	-	-	-	-	-	-	-	-	-	-	-	-	-	-	-	-	-	-	-	0.157 (19/121)	-	-	-	-	-	-	-	-	-	-	-	-	-	-	-	-
2	129017265	TA	T	Zc3h6	ENSMUST00000110320.8	c.3221delA	p.Asn1074fs	frameshift_variant	1	-	-	-	-	-	-	-	-	-	-	-	-	-	0.1193 (13/109)	-	-	-	-	-	-	-	-	-	-	-	-	-	-	-	-	-	-	-	-	-	-	-	-	-	-
2	129017265	TA	T	Gm14027	ENSMUST00000135186.1	n.241+79delA		intron_variant	1	-	-	-	-	-	-	-	-	-	-	-	-	-	0.1193 (13/109)	-	-	-	-	-	-	-	-	-	-	-	-	-	-	-	-	-	-	-	-	-	-	-	-	-	-
2	129269101	A	G	Ckap2l	ENSMUST00000052708.6	c.2175T>C	p.Cys725Cys	synonymous_variant	1	-	-	-	-	-	-	-	-	-	-	-	-	-	0.2593 (21/81)	-	-	-	-	-	-	-	-	-	-	-	-	-	-	-	-	-	-	-	-	-	-	-	-	-	-
2	130393436	G	A	Cpxm1	ENSMUST00000028897.7	c.1635C>T	p.Phe545Phe	synonymous_variant	1	-	-	-	-	-	-	-	-	-	-	-	-	-	-	-	-	-	-	-	-	-	-	-	-	-	-	-	-	-	-	-	-	-	-	-	-	-	-	-	0.4333 (52/120)
2	130407662	T	TGA	Tmem239	ENSMUST00000055421.5	c.*484_*485insAG		3_prime_UTR_variant	3	-	-	-	-	-	-	-	-	-	-	-	-	-	-	-	-	-	-	-	-	-	-	-	-	-	-	-	-	-	-	-	-	-	-	-	-	-	-	-	-
2	130407662	T	TGA	Gm28372	ENSMUST00000188900.1	c.*449_*450insAG		3_prime_UTR_variant	3	-	-	-	-	-	-	-	-	-	-	-	-	-	-	-	-	-	-	-	-	-	-	-	-	-	-	-	-	-	-	-	-	-	-	-	-	-	-	-	-
2	130437934	G	T	Vps16	ENSMUST00000028900.10	c.162G>T	p.Trp54Cys	missense_variant	1	-	-	-	-	-	-	-	-	-	-	-	-	-	-	-	-	-	-	-	-	-	-	-	-	-	-	-	-	-	-	-	-	-	-	-	-	-	-	-	-
2	131293446	G	A	Pank2	ENSMUST00000150843.7	c.1203G>A	p.Thr401Thr	synonymous_variant	1	-	-	-	-	-	-	-	-	-	-	-	-	-	-	-	-	-	-	-	-	-	-	-	-	-	-	-	-	-	-	-	-	-	-	-	-	-	-	-	-
2	136550436	G	T	Ankef1	ENSMUST00000028726.8	c.1544G>T	p.Gly515Val	missense_variant	1	-	-	-	-	-	-	-	-	-	-	-	-	-	-	-	-	-	-	-	-	-	-	-	-	-	-	-	-	-	-	-	-	-	-	-	-	-	-	-	-
2	136550437	A	T	Ankef1	ENSMUST00000028726.8	c.1545A>T	p.Gly515Gly	synonymous_variant	1	-	-	-	-	-	-	-	-	-	-	-	-	-	-	-	-	-	-	-	-	-	-	-	-	-	-	-	-	-	-	-	-	-	-	-	-	-	-	-	-
2	136781115	G	A	Snap25	ENSMUST00000028727.10	c.593G>A	p.Arg198His	missense_variant	1	-	-	-	-	-	-	-	0.1584 (16/101)	-	-	-	-	-	-	-	-	-	-	-	-	-	-	-	-	-	-	-	-	-	-	-	-	-	-	-	-	-	-	-	-
2	139678794	G	T	Ism1	ENSMUST00000184404.7	c.125G>T	p.Gly42Val	missense_variant	1	-	-	-	-	-	-	-	-	-	-	-	-	-	-	-	-	-	-	-	-	-	-	-	-	-	-	-	-	-	-	-	0.4571 (16/35)	-	-	-	-	-	-	-	-
2	140263425	A	G	Sel1l2	ENSMUST00000122367.7	c.844T>C	p.Trp282Arg	missense_variant	1	-	-	-	-	-	-	-	-	-	-	-	-	-	-	-	-	-	-	-	-	-	-	-	-	-	-	-	-	-	-	-	-	-	-	-	-	-	-	-	-
2	143749106	G	A	Pcsk2	ENSMUST00000028905.9	c.541-19G>A		intron_variant	1	-	-	-	-	-	-	-	-	-	-	-	-	-	-	-	-	-	-	-	-	-	-	-	-	-	-	-	-	-	-	-	0.197 (40/203)	-	-	-	-	-	-	-	-
2	143749106	G	A	Pcsk2os2	ENSMUST00000153878.7	n.1847C>T		non_coding_transcript_exon_variant	1	-	-	-	-	-	-	-	-	-	-	-	-	-	-	-	-	-	-	-	-	-	-	-	-	-	-	-	-	-	-	-	0.197 (40/203)	-	-	-	-	-	-	-	-
2	144279639	G	C	Mgme1	ENSMUST00000028910.8	c.1014G>C	p.Ala338Ala	synonymous_variant	1	-	-	-	-	-	-	-	-	-	-	-	-	-	-	-	-	-	-	-	-	-	-	-	-	-	-	-	-	-	-	-	-	-	-	-	-	-	-	-	-
2	144566945	C	T	Sec23b	ENSMUST00000028916.14	c.549C>T	p.Ile183Ile	synonymous_variant	1	-	-	-	-	-	-	-	-	-	-	-	-	-	-	-	-	-	-	-	-	-	-	-	-	-	-	-	-	-	-	-	-	-	-	0.2222 (22/99)	-	-	-	-	-
2	145926768	G	C	Crnkl1	ENSMUST00000001818.4	c.972+8C>G		splice_region_variant&intron_variant	1	-	-	-	-	-	-	-	-	-	-	-	-	-	-	-	-	-	-	-	-	-	-	-	-	-	-	-	-	-	-	-	-	-	-	-	-	-	-	-	-
2	148872815	A	T	Cst3	ENSMUST00000028938.6	c.339+2T>A		splice_donor_variant&intron_variant	2	-	-	-	-	-	-	-	-	-	-	-	-	-	-	-	0.75 (9/12)	-	-	-	-	-	-	-	-	-	-	-	-	-	-	-	-	-	-	0.6111 (22/36)	-	-	-	-	-
2	150237015	G	T	Zfp937	ENSMUST00000073782.3	c.131-14G>T		intron_variant	1	-	-	-	-	-	-	-	-	-	-	-	-	-	-	-	-	-	-	-	-	-	-	-	-	-	-	-	-	-	-	-	-	-	-	-	-	-	-	-	-
2	151586287	C	A	Sdcbp2	ENSMUST00000028950.8	c.226-40C>A		intron_variant	1	-	-	-	-	-	-	-	-	-	-	-	-	-	-	-	-	-	-	-	-	-	-	-	-	-	-	-	-	-	-	-	-	-	-	-	-	-	-	-	-
2	153178979	C	T	Tm9sf4	ENSMUST00000089027.2	c.106C>T	p.Gln36*	stop_gained	1	-	0.38 (38/100)	-	-	-	-	-	-	-	-	-	-	-	-	-	-	-	-	-	-	-	-	-	-	-	-	-	-	-	-	-	-	-	-	-	-	-	-	-	-
2	154013763	G	C	Bpifa2	ENSMUST00000048103.8	c.606+1G>C		splice_donor_variant&intron_variant	1	-	-	-	-	-	-	-	-	-	-	-	-	-	-	-	-	-	-	-	-	-	-	-	-	-	-	-	-	-	-	-	-	-	-	-	-	-	-	-	-
2	154143912	T	C	Bpifa1	ENSMUST00000028985.7	c.146T>C	p.Leu49Pro	missense_variant	1	-	-	-	-	-	-	-	-	-	-	-	-	-	-	-	-	-	-	-	-	-	-	-	-	-	-	-	-	-	-	-	-	-	-	-	-	-	-	-	-
2	154555620	C	A	Necab3	ENSMUST00000000895.12	c.200G>T	p.Arg67Leu	missense_variant	1	-	-	-	-	-	-	-	0.1081 (4/37)	-	-	-	-	-	-	-	-	-	-	-	-	-	-	-	-	-	-	-	-	-	-	-	-	-	-	-	-	-	-	-	-
2	155564864	C	A	Gss	ENSMUST00000079691.12	c.1197G>T	p.Glu399Asp	missense_variant	2	-	-	-	-	-	-	-	-	-	-	-	-	-	-	-	-	-	-	-	-	-	-	-	-	-	-	-	-	-	-	-	-	-	-	-	0.1987 (31/156)	-	-	-	-
2	155564864	C	A	Acss2	ENSMUSG00000027605	n.155564864C>A		intragenic_variant	2	-	-	-	-	-	-	-	-	-	-	-	-	-	-	-	-	-	-	-	-	-	-	-	-	-	-	-	-	-	-	-	-	-	-	-	0.1987 (31/156)	-	-	-	-
2	155653682	CAG	C	Trpc4ap	ENSMUST00000041059.11	c.866-6_866-5delCT		splice_region_variant&intron_variant	1	-	-	-	-	-	-	-	-	-	-	-	-	-	-	-	-	-	-	-	-	-	-	-	-	-	-	-	-	-	-	-	-	-	-	-	-	-	-	-	-
2	155998499	A	AC	Cep250	ENSMUST00000109619.8	c.*68_*69insC		3_prime_UTR_variant	1	-	-	-	-	-	-	-	-	-	-	-	-	-	-	-	-	-	-	-	-	-	-	-	-	-	-	-	-	-	-	-	-	-	-	-	-	-	-	-	-
2	155998499	A	AC	6430550D23Rik	ENSMUSG00000074646	n.155998500_155998499insG		intragenic_variant	1	-	-	-	-	-	-	-	-	-	-	-	-	-	-	-	-	-	-	-	-	-	-	-	-	-	-	-	-	-	-	-	-	-	-	-	-	-	-	-	-
2	156002389	GT	G	6430550D23Rik	ENSMUST00000109617.8	c.*31+47delA		intron_variant	1	-	-	-	-	-	-	-	-	-	-	-	-	-	-	-	-	-	-	-	-	-	-	-	-	-	-	-	-	-	-	-	-	-	-	-	-	-	-	-	-
2	156074135	G	C	Cpne1	ENSMUST00000109607.9	c.1233+41C>G		intron_variant	2	-	-	-	-	-	-	-	-	-	-	-	-	-	-	-	-	-	-	-	-	-	-	0.3462 (18/52)	-	-	-	-	-	-	-	-	-	-	-	-	-	-	-	-	-
2	156074135	G	C	Gm28036	ENSMUST00000132494.7	c.*1287+41C>G		intron_variant	2	-	-	-	-	-	-	-	-	-	-	-	-	-	-	-	-	-	-	-	-	-	-	0.3462 (18/52)	-	-	-	-	-	-	-	-	-	-	-	-	-	-	-	-	-
2	156179989	G	C	Rbm39	ENSMUST00000109587.8	c.-116C>G		5_prime_UTR_variant	1	-	-	-	-	-	-	-	-	-	-	-	-	-	-	-	-	-	-	-	-	-	-	-	-	-	-	-	-	-	-	-	-	-	-	-	-	-	-	-	-
2	156273703	C	T	Phf20	ENSMUST00000037401.9	c.943C>T	p.Arg315Cys	missense_variant	2	-	-	-	-	-	-	-	-	-	-	-	-	-	-	-	-	-	-	-	-	-	-	-	-	-	-	-	-	-	-	-	-	-	-	-	-	-	-	-	-
2	158794905	G	T	Dhx35	ENSMUST00000109478.8	c.17G>T	p.Gly6Val	missense_variant	1	-	-	-	-	-	-	-	-	-	-	-	-	-	-	-	-	-	-	-	-	-	-	-	-	-	-	-	-	-	-	-	-	-	-	-	-	-	-	-	-
2	160983177	C	CT	Chd6	ENSMUST00000039782.13	c.3560dupA	p.Thr1188fs	frameshift_variant	1	-	-	-	-	-	-	-	-	-	-	-	-	-	-	-	-	-	-	-	-	-	-	-	-	-	-	-	-	-	-	-	-	-	-	-	-	-	-	-	-
2	161927545	G	T	Ptprt	ENSMUST00000109441.1	c.1399C>A	p.Leu467Ile	missense_variant	1	-	-	-	-	-	-	-	-	-	-	-	-	-	-	-	-	-	-	-	-	-	-	-	-	-	-	-	-	-	-	-	-	-	-	-	-	-	-	-	-
2	163829108	A	C	Wisp2	ENSMUST00000029188.7	c.534A>C	p.Gln178His	missense_variant&splice_region_variant	1	-	-	-	-	-	-	-	-	-	-	-	-	-	-	-	-	-	-	-	-	-	-	-	-	-	-	-	-	-	-	-	-	-	-	-	-	-	-	-	-
2	164060922	T	G	Tomm34	ENSMUST00000018466.3	c.467A>C	p.Lys156Thr	missense_variant	1	-	-	-	-	-	-	-	-	-	0.1972 (14/71)	-	-	-	-	-	-	-	-	-	-	-	-	-	-	-	-	-	-	-	-	-	-	-	-	-	-	-	-	-	-
2	164826805	T	C	Zswim1	ENSMUST00000017908.2	c.*608T>C		3_prime_UTR_variant	1	-	-	-	-	-	-	-	-	-	-	-	-	-	-	-	-	-	-	-	-	-	-	-	-	-	-	-	-	-	-	-	-	-	-	-	-	-	-	-	-
2	164826805	T	C	Spata25	ENSMUSG00000017767	n.164826805A>G		intragenic_variant	1	-	-	-	-	-	-	-	-	-	-	-	-	-	-	-	-	-	-	-	-	-	-	-	-	-	-	-	-	-	-	-	-	-	-	-	-	-	-	-	-
2	164837169	C	G	Ctsa	ENSMUST00000017904.8	c.909-13C>G		intron_variant	1	-	-	-	-	-	-	-	-	-	-	-	-	-	-	-	-	-	-	-	-	-	-	-	-	-	-	-	-	-	-	-	-	-	-	-	-	-	-	-	-
2	165012881	T	C	Ncoa5	ENSMUST00000040381.14	c.320A>G	p.Tyr107Cys	missense_variant	1	-	-	-	-	-	-	-	-	-	-	-	-	-	-	-	-	-	-	-	-	-	-	-	-	-	-	-	-	-	-	-	-	-	-	-	-	-	-	-	-
2	166079510	G	C	Sulf2	ENSMUST00000088086.3	c.2192C>G	p.Thr731Arg	missense_variant	2	-	-	-	-	-	-	-	-	-	-	-	-	-	-	-	-	-	-	-	-	-	-	-	-	-	-	-	-	-	-	-	-	-	-	-	-	-	-	-	-
2	166941481	A	C	Cse1l	ENSMUST00000002790.13	c.2354A>C	p.Lys785Thr	missense_variant	1	-	-	-	-	-	-	-	-	-	0.1888 (27/143)	-	-	-	-	-	-	-	-	-	-	-	-	-	-	-	-	-	-	-	-	-	-	-	-	-	-	-	-	-	-
2	167104881	C	T	Kcnb1	ENSMUST00000059826.9	c.2046G>A	p.Pro682Pro	synonymous_variant	1	-	-	-	-	-	-	-	-	-	-	-	-	-	-	-	-	-	-	-	-	-	-	-	-	-	-	-	-	-	-	-	-	-	-	-	-	-	-	-	-
2	168754496	T	A	Sall4	ENSMUST00000029061.11	c.2423A>T	p.Lys808Met	missense_variant	1	-	-	-	-	-	-	-	-	-	-	-	-	-	-	-	-	-	-	-	-	-	-	-	-	-	-	-	-	-	-	-	-	-	-	-	-	-	-	-	-
2	172352643	G	A	Fam210b	ENSMUST00000028995.4	c.414G>A	p.Gln138Gln	synonymous_variant	1	-	-	-	-	-	-	-	-	-	-	-	-	-	-	-	-	-	-	-	-	-	-	-	-	-	-	-	-	-	-	-	-	-	-	-	-	-	-	-	-
2	180177359	C	T	Lama5	ENSMUST00000015791.5	c.10643G>A	p.Arg3548Gln	missense_variant	2	-	-	-	-	-	-	-	-	-	-	-	-	-	-	-	-	-	-	-	-	-	-	-	-	-	-	-	-	-	-	-	-	-	-	-	-	-	-	-	-
2	180202388	G	C	Lama5	ENSMUST00000015791.5	c.1087+4C>G		splice_region_variant&intron_variant	1	-	-	-	-	-	0.2333 (14/60)	-	-	-	-	-	-	-	-	-	-	-	-	-	-	-	-	-	-	-	-	-	-	-	-	-	-	-	-	-	-	-	-	-	-
2	180257775	T	G	Rps21	ENSMUST00000059080.6	c.51-13T>G		intron_variant	1	-	-	-	-	-	-	-	-	-	-	-	-	-	-	-	-	-	-	-	-	-	-	-	-	-	-	-	-	-	-	-	-	-	-	-	-	-	-	-	-
2	180595111	G	A	Ogfr	ENSMUST00000029087.3	c.1488G>A	p.Glu496Glu	synonymous_variant	1	-	-	-	-	-	-	-	-	-	-	-	-	-	-	-	-	-	-	-	-	-	-	-	-	-	-	-	-	-	-	-	-	-	-	-	-	-	-	-	-
2	180659785	C	G	Dido1	ENSMUST00000087517.9	c.6325G>C	p.Glu2109Gln	missense_variant	1	-	-	-	-	-	-	-	-	-	-	-	-	-	-	-	-	-	-	-	-	-	-	-	-	-	-	-	-	-	-	-	-	-	-	-	-	-	-	-	-
2	180660117	A	AG	Dido1	ENSMUST00000087517.9	c.5992dupC	p.Leu1998fs	frameshift_variant	1	-	-	-	-	-	-	-	-	-	-	-	-	-	-	-	-	-	-	-	-	-	-	-	-	-	-	-	-	-	-	-	-	-	-	-	-	0.1481 (4/27)	-	-	-
2	180660383	A	G	Dido1	ENSMUST00000087517.9	c.5727T>C	p.Thr1909Thr	synonymous_variant	1	-	-	-	-	-	-	-	-	-	-	-	-	-	-	-	-	-	-	-	-	-	-	-	-	-	-	-	-	-	-	-	-	-	-	-	-	-	-	-	-
2	180919114	A	G	Ythdf1	ENSMUST00000108876.8	c.213+21T>C		intron_variant	1	-	-	-	-	-	-	-	-	-	-	-	-	-	-	-	-	-	-	-	-	0.2759 (24/87)	-	-	-	-	-	-	-	-	-	-	-	-	-	-	-	-	-	-	-
2	181320866	A	C	Rtel1	ENSMUST00000054622.14	c.-90A>C		5_prime_UTR_variant	1	-	-	-	-	-	-	-	-	-	-	-	-	-	-	-	-	-	-	-	-	-	-	-	-	-	-	-	0.2609 (6/23)	-	-	-	-	-	-	-	-	-	-	-	-
3	3657039	T	C	Hnf4g	ENSMUST00000108394.2	c.1268-16T>C		intron_variant	1	-	-	-	-	-	-	-	-	-	-	-	-	-	-	-	-	-	-	-	-	-	-	-	-	-	-	-	-	-	-	-	-	-	-	-	-	-	-	-	-
3	5399849	C	CT	Zfhx4	ENSMUST00000175866.7	c.5147dupT	p.Leu1716fs	frameshift_variant	2	-	-	-	-	-	-	-	-	-	-	-	-	-	-	-	-	-	-	-	-	-	-	-	-	-	-	-	-	-	-	-	-	-	-	-	-	-	-	-	-
3	10012588	A	G	Fabp5	ENSMUST00000029046.8	c.-52A>G		5_prime_UTR_variant	1	-	-	-	-	-	-	-	-	-	-	-	-	-	-	-	-	-	-	-	-	-	-	-	-	-	-	-	-	-	0.1702 (8/47)	-	-	-	-	-	-	-	-	-	-
3	14565802	G	GA	Lrrcc1	ENSMUST00000169079.7	c.3034dupA	p.Ile1012fs	frameshift_variant	1	-	-	-	-	-	-	-	-	-	-	-	-	-	-	-	0.1026 (4/39)	-	-	-	-	-	-	-	-	-	-	-	-	-	-	-	-	-	-	-	-	-	-	-	-
3	15410638	G	C	Sirpb1a	ENSMUST00000099201.8	c.836C>G	p.Pro279Arg	missense_variant	1	-	-	-	-	-	-	-	-	-	-	-	-	-	-	-	-	-	-	-	-	-	-	-	-	-	-	-	-	-	-	-	-	-	-	-	-	-	-	-	-
3	19896261	C	CT	4632415L05Rik	ENSMUST00000198527.1	n.1370dupT		non_coding_transcript_exon_variant	1	-	-	-	-	-	-	-	-	-	-	-	-	-	-	-	-	-	-	-	-	-	-	-	-	-	-	-	-	-	-	-	-	-	-	-	-	-	-	-	-
3	19985535	G	C	Cp	ENSMUST00000108329.7	c.2540-25G>C		intron_variant	1	-	-	-	-	-	-	-	-	-	-	-	-	-	-	-	-	-	-	-	-	-	-	-	-	-	-	-	-	-	-	-	-	-	-	-	0.15 (6/40)	-	-	-	-
3	20275414	C	T	Cpb1	ENSMUST00000011607.5	c.141+6G>A		splice_region_variant&intron_variant	1	-	-	-	-	-	-	-	-	-	-	-	-	-	-	-	-	-	-	-	-	-	-	-	-	-	-	-	-	-	-	-	-	-	-	-	-	-	-	-	-
3	24333469	G	A	Naaladl2	ENSMUST00000203414.1	c.1090+1725C>T		intron_variant	1	-	-	-	-	-	-	-	-	-	-	-	-	-	0.1 (9/90)	-	-	-	-	-	-	-	-	-	-	-	-	-	-	-	-	-	-	-	-	-	-	-	-	-	-
3	24333469	G	A	Gm7536	ENSMUST00000077389.7	n.402G>A		non_coding_transcript_exon_variant	1	-	-	-	-	-	-	-	-	-	-	-	-	-	0.1 (9/90)	-	-	-	-	-	-	-	-	-	-	-	-	-	-	-	-	-	-	-	-	-	-	-	-	-	-
3	26983117	C	A	Spata16	ENSMUST00000047005.10	c.*75C>A		3_prime_UTR_variant	1	-	-	-	-	-	-	-	-	-	-	-	-	-	-	-	-	-	-	-	-	0.3415 (14/41)	-	-	-	-	-	-	-	-	-	-	-	-	-	-	-	-	-	-	-
3	27620660	G	A	Fndc3b	ENSMUST00000046157.9	c.132C>T	p.Asn44Asn	synonymous_variant	2	-	-	-	-	-	-	-	-	-	-	-	-	-	-	-	-	-	-	-	-	-	-	-	-	-	-	-	-	-	-	-	-	-	-	-	-	-	0.3827 (31/81)	-	-
3	29686710	G	A	Egfem1	ENSMUST00000119598.7	c.1532G>A	p.Cys511Tyr	missense_variant	1	-	-	-	-	-	-	-	-	-	-	-	-	-	-	-	-	-	-	-	-	-	-	-	-	-	-	-	-	-	-	-	-	-	-	-	-	-	-	-	-
3	32958769	C	T	Pex5l	ENSMUST00000193289.5	c.988G>A	p.Val330Ile	missense_variant	1	-	-	-	-	-	-	-	-	-	-	-	-	-	-	-	-	-	-	-	-	-	-	-	-	-	-	-	-	-	-	-	-	-	-	-	-	-	-	-	-
3	32958769	C	T	Gm37459	ENSMUST00000192259.1	n.787-2534C>T		intron_variant	1	-	-	-	-	-	-	-	-	-	-	-	-	-	-	-	-	-	-	-	-	-	-	-	-	-	-	-	-	-	-	-	-	-	-	-	-	-	-	-	-
3	33801001	T	TA	Ttc14	ENSMUST00000108210.8	c.210dupA	p.Ala71fs	frameshift_variant	1	-	-	-	-	-	-	-	-	-	-	-	-	-	-	-	-	-	-	-	-	-	-	-	-	-	-	-	-	-	-	-	-	-	-	-	-	-	-	-	-
3	34651483	G	GA	Sox2	ENSMUST00000099151.5	c.*116dupA		3_prime_UTR_variant	1	-	-	-	-	-	-	-	-	-	-	-	-	-	-	-	-	-	-	-	-	-	-	-	-	-	-	-	-	-	-	-	-	-	-	-	-	-	-	-	-
3	34651483	G	GA	Sox2ot	ENSMUST00000199171.4	n.388+12852dupA		intron_variant	1	-	-	-	-	-	-	-	-	-	-	-	-	-	-	-	-	-	-	-	-	-	-	-	-	-	-	-	-	-	-	-	-	-	-	-	-	-	-	-	-
3	34651483	GA	G	Sox2	ENSMUST00000099151.5	c.*116delA		3_prime_UTR_variant	1	-	-	-	-	-	-	-	-	-	-	-	-	-	-	-	-	-	-	-	-	-	-	-	-	-	-	-	-	-	-	-	-	-	0.1489 (14/94)	-	-	-	-	-	-
3	34651483	GA	G	Sox2ot	ENSMUST00000199171.4	n.388+12852delA		intron_variant	1	-	-	-	-	-	-	-	-	-	-	-	-	-	-	-	-	-	-	-	-	-	-	-	-	-	-	-	-	-	-	-	-	-	0.1489 (14/94)	-	-	-	-	-	-
3	35897527	A	G	Dcun1d1	ENSMUST00000108182.9	c.637T>C	p.Trp213Arg	missense_variant	1	-	-	-	-	-	-	-	-	-	-	-	-	-	-	-	-	-	-	-	-	-	-	-	-	-	-	-	-	-	-	-	-	-	-	-	-	-	-	-	-
3	36465247	T	G	Anxa5	ENSMUST00000029266.13	c.88+4A>C		splice_region_variant&intron_variant	1	-	-	-	-	-	-	-	-	-	-	-	-	-	-	-	0.5833 (7/12)	-	-	-	-	-	-	-	-	-	-	-	-	-	-	-	-	-	-	-	-	-	-	-	-
3	36465311	A	C	Anxa5	ENSMUST00000029266.13	c.28T>G	p.Phe10Val	missense_variant	1	-	-	-	-	-	-	-	-	-	0.3536 (535/1513)	-	-	-	-	-	-	-	-	-	-	-	-	-	-	-	-	-	-	-	-	-	-	-	-	-	-	-	-	-	-
3	37029945	C	CA	4932438A13Rik	ENSMUST00000057272.14	c.11516dupA	p.Lys3840fs	frameshift_variant	16	-	-	-	-	-	-	-	-	-	-	-	-	-	-	-	-	-	-	-	0.1739 (4/23)	-	-	-	-	-	-	-	-	-	-	-	-	0.2333 (7/30)	-	-	-	0.5385 (7/13)	-	-	-
3	37310397	C	CT	Cetn4	ENSMUST00000102955.10	c.45dupA	p.Ala16fs	frameshift_variant	1	-	-	-	-	-	-	-	-	-	-	-	-	-	-	-	-	-	-	-	-	-	-	-	-	-	-	-	-	-	-	-	-	-	-	-	-	-	-	-	-
3	37642741	C	A	Spry1	ENSMUST00000038569.7	c.132C>A	p.Ile44Ile	synonymous_variant	2	-	-	-	-	-	-	-	-	-	-	-	-	-	-	-	-	-	-	-	-	-	-	-	-	-	-	-	-	-	-	-	-	-	-	-	-	-	-	-	-
3	40768775	T	TA	Hspa4l	ENSMUST00000204702.2	c.1164dupA	p.Val389fs	frameshift_variant	1	-	-	-	-	-	-	-	-	-	-	-	-	-	-	-	-	-	-	-	-	-	-	-	-	-	-	-	-	-	-	-	-	-	-	-	-	-	-	-	-
3	45381481	G	GA	Pcdh10	ENSMUST00000166126.6	c.2235dupA	p.Leu746fs	frameshift_variant	1	-	-	-	-	-	-	-	-	-	-	-	-	-	-	-	-	-	-	-	-	-	-	-	-	-	-	-	-	-	-	-	-	-	-	-	-	-	-	-	-
3	52104322	G	GT	Maml3	ENSMUST00000121440.3	c.-180dupA		5_prime_UTR_variant	1	-	-	-	-	-	-	-	-	-	-	-	-	-	-	-	-	-	-	-	-	-	-	-	-	-	-	-	-	-	-	-	-	-	-	-	-	-	-	-	-
3	57293104	T	A	Tm4sf1	ENSMUST00000029376.12	c.178-2A>T		splice_acceptor_variant&intron_variant	1	-	-	-	-	-	-	-	-	-	-	-	-	-	-	-	-	-	-	-	-	-	-	-	-	-	-	-	-	-	-	-	-	-	-	-	-	-	-	-	-
3	59068223	CT	C	Med12l	ENSMUST00000164225.5	c.557-9delT		intron_variant	1	-	-	-	-	-	-	-	-	-	-	-	-	0.2105 (4/19)	-	-	-	-	-	-	-	-	-	-	-	-	-	-	-	-	-	-	-	-	-	-	-	-	-	-	-
3	59318904	T	C	Igsf10	ENSMUST00000039419.11	c.7347A>G	p.Gln2449Gln	synonymous_variant	2	-	-	-	-	-	-	-	-	-	-	-	-	-	-	-	-	-	-	-	-	-	-	-	-	-	-	-	-	-	-	-	-	-	-	-	-	-	-	-	-
3	62419534	C	CT	Arhgef26	ENSMUST00000079300.12	c.1482-5dupT		splice_region_variant&intron_variant	1	-	-	-	-	-	-	-	-	-	-	-	-	0.1852 (5/27)	-	-	-	-	-	-	-	-	-	-	-	-	-	-	-	-	-	-	-	-	-	-	-	-	-	-	-
3	63707808	TA	T	Plch1	ENSMUST00000084105.11	c.2275-8delT		splice_region_variant&intron_variant	1	-	-	-	-	-	-	-	-	-	-	-	-	-	-	-	-	-	-	-	-	-	-	-	-	-	-	-	-	-	-	-	-	-	-	-	-	-	-	-	-
3	65946608	T	C	Ccnl1	ENSMUST00000029416.13	c.1591A>G	p.Arg531Gly	missense_variant	1	-	-	-	-	-	-	-	-	-	-	-	-	-	-	-	-	-	-	-	-	-	-	-	-	-	-	-	-	-	-	-	-	-	-	-	-	-	-	-	-
3	78917576	C	CG	Gm10291	ENSMUST00000094175.6	n.322dupG		non_coding_transcript_exon_variant	1	-	-	-	-	-	-	-	-	-	-	-	-	-	-	-	0.2105 (4/19)	-	-	-	-	-	-	-	-	-	-	-	-	-	-	-	-	-	-	-	-	-	-	-	-
3	80861993	G	C	Glrb	ENSMUST00000029654.14	c.426C>G	p.Asp142Glu	missense_variant	1	-	-	-	-	-	-	-	-	-	-	-	-	-	-	-	-	-	-	-	-	-	-	-	-	-	-	-	-	-	-	-	-	-	-	-	-	-	-	-	-
3	86325665	T	C	Lrba	ENSMUST00000107635.6	c.2368-36T>C		intron_variant	1	-	-	-	-	-	-	-	-	-	-	-	-	-	-	-	-	-	-	-	-	-	-	-	-	-	-	-	-	-	-	-	-	-	-	-	-	-	-	-	-
3	88325745	C	A	Glmp	ENSMUST00000177005.7	c.189C>A	p.Ser63Arg	missense_variant	1	-	-	-	-	-	-	-	-	-	-	-	-	-	-	-	-	-	-	-	-	-	-	-	-	-	-	-	-	-	-	-	-	-	-	-	-	-	-	-	-
3	88336475	C	G	Smg5	ENSMUST00000001451.10	c.52C>G	p.Leu18Val	missense_variant	1	-	-	-	-	-	-	-	-	-	-	-	-	-	-	-	-	-	-	-	-	-	-	-	-	-	-	-	-	-	-	-	-	-	-	-	-	-	-	-	-
3	88486597	G	A	Lmna	ENSMUST00000029699.12	c.673C>T	p.Arg225Trp	missense_variant	2	-	0.9493 (749/789)	-	-	-	0.5882 (20/34)	-	-	-	-	-	-	-	-	-	-	-	-	-	-	-	-	-	-	-	-	-	-	-	-	-	-	-	-	-	-	-	-	-	-
3	88549928	C	T	Lamtor2	ENSMUST00000029698.14	c.*20G>A		3_prime_UTR_variant	1	-	-	-	-	-	-	-	-	-	-	-	-	-	-	-	-	-	-	-	-	-	-	-	-	-	-	-	-	-	-	-	-	-	-	-	-	-	-	-	-
3	88553854	TCAAGACCCC	T	Ubqln4	ENSMUST00000008748.7	c.55_63delACCCCCAAG	p.Thr19_Lys21del	conservative_inframe_deletion	2	-	-	-	-	-	-	-	-	-	-	-	-	-	-	-	-	-	-	-	-	-	-	-	-	-	-	-	-	-	-	-	-	-	-	-	-	-	-	-	-
3	88816703	G	C	1500004A13Rik	ENSMUSG00000098912	n.88816703C>G		intragenic_variant	1	-	-	-	-	-	-	-	-	-	-	-	-	-	-	-	-	-	-	-	-	-	-	-	-	-	-	-	-	-	-	-	-	-	-	-	-	-	-	-	-
3	88816703	G	C	5830417I10Rik	ENSMUST00000135913.1	n.2615G>C		non_coding_transcript_exon_variant	1	-	-	-	-	-	-	-	-	-	-	-	-	-	-	-	-	-	-	-	-	-	-	-	-	-	-	-	-	-	-	-	-	-	-	-	-	-	-	-	-
3	88982764	G	GA	Ash1l	ENSMUST00000090933.4	c.1955dupA	p.Pro653fs	frameshift_variant	1	-	-	-	-	0.125 (4/32)	-	-	-	-	-	-	-	-	-	-	-	-	-	-	-	-	-	-	-	-	-	-	-	-	-	-	-	-	-	-	-	-	-	-	-
3	90271767	C	CT	Dennd4b	ENSMUST00000098914.9	c.1843dupT	p.Tyr615fs	frameshift_variant	1	-	-	-	-	-	-	-	-	-	-	-	-	-	-	-	0.2222 (4/18)	-	-	-	-	-	-	-	-	-	-	-	-	-	-	-	-	-	-	-	-	-	-	-	-
3	92026589	C	CA	Pglyrp3	ENSMUST00000047660.4	c.546dupA	p.Ala183fs	frameshift_variant&splice_region_variant	1	-	-	-	-	-	-	-	-	-	-	-	-	-	-	-	-	-	-	-	-	-	-	-	-	-	-	-	0.1667 (4/24)	-	-	-	-	-	-	-	-	-	-	-	-
3	92428335	G	T	Gm9774	ENSMUST00000192538.1	c.1059C>A	p.Gly353Gly	synonymous_variant	1	-	-	-	-	-	-	-	-	-	-	-	-	-	-	-	-	-	-	-	-	-	-	-	-	-	-	-	-	-	-	-	-	-	-	-	-	-	-	-	-
3	93397469	A	G	Rptn	ENSMUST00000045912.2	c.2108A>G	p.Gln703Arg	missense_variant	1	-	-	-	-	-	-	-	-	-	-	-	-	-	-	-	-	-	-	-	-	-	-	-	-	-	-	-	-	-	-	-	-	-	-	-	-	-	-	-	-
3	93397469	A	G	Gm37245	ENSMUST00000195137.1	n.217+11976T>C		intron_variant	1	-	-	-	-	-	-	-	-	-	-	-	-	-	-	-	-	-	-	-	-	-	-	-	-	-	-	-	-	-	-	-	-	-	-	-	-	-	-	-	-
3	93398682	C	A	Rptn	ENSMUST00000045912.2	c.3321C>A	p.Tyr1107*	stop_gained	1	-	-	-	-	-	-	-	-	0.3478 (16/46)	-	-	-	-	-	-	-	-	-	-	-	-	-	-	-	-	-	-	-	-	-	-	-	-	-	-	-	-	-	-	-
3	93398682	C	A	Gm37245	ENSMUST00000195137.1	n.217+10763G>T		intron_variant	1	-	-	-	-	-	-	-	-	0.3478 (16/46)	-	-	-	-	-	-	-	-	-	-	-	-	-	-	-	-	-	-	-	-	-	-	-	-	-	-	-	-	-	-	-
3	93670376	A	C	Tdpoz1	ENSMUST00000094413.4	c.*2T>G		3_prime_UTR_variant	1	-	-	-	-	-	-	-	-	-	-	-	-	-	-	-	-	-	-	-	-	-	-	-	-	-	-	-	-	-	-	-	-	-	-	-	-	-	-	-	-
3	93909982	A	G	Gm9116	ENSMUST00000192400.1	n.158A>G		non_coding_transcript_exon_variant	2	-	-	-	-	-	-	-	-	-	-	-	-	-	-	-	-	-	-	-	-	-	-	-	-	-	-	-	-	-	-	-	-	-	-	-	-	-	-	-	-
3	93909997	G	A	Gm9116	ENSMUST00000192400.1	n.173G>A		non_coding_transcript_exon_variant	2	-	-	-	-	-	-	-	-	-	-	-	-	-	-	-	-	-	-	-	-	-	-	-	-	-	-	-	-	-	-	-	-	-	-	-	-	-	-	-	-
3	94436430	C	A	Oaz3	ENSMUST00000199678.3	c.125G>T	p.Arg42Leu	missense_variant	1	-	-	-	-	-	-	-	-	-	-	-	-	-	-	-	-	-	-	-	-	-	-	-	-	-	-	-	-	-	-	-	-	-	-	-	-	-	-	-	-
3	94582300	G	C	Snx27	ENSMUST00000107283.7	c.250C>G	p.Pro84Ala	missense_variant	1	-	-	-	-	-	-	-	-	-	-	-	-	-	-	-	-	-	-	-	-	-	-	-	-	-	-	-	-	-	-	-	-	-	-	-	-	-	-	-	-
3	94763001	G	A	Cgn	ENSMUST00000107273.7	c.3145C>T	p.Arg1049Trp	missense_variant	3	-	-	-	-	-	-	-	-	-	-	-	-	-	-	-	-	-	-	-	-	-	-	-	-	-	-	-	-	-	-	-	-	-	-	-	-	-	-	-	-
3	94770016	C	T	Cgn	ENSMUST00000107273.7	c.2226G>A	p.Ala742Ala	synonymous_variant	1	-	-	-	-	-	-	-	-	-	-	-	-	-	-	-	-	-	-	-	-	-	-	-	-	-	-	-	-	-	-	-	-	-	-	-	-	-	-	-	-
3	95129732	A	G	Scnm1	ENSMUST00000172572.8	c.*181T>C		3_prime_UTR_variant	4	-	-	-	-	-	-	-	-	-	-	-	-	-	-	-	-	-	-	-	-	-	0.2222 (4/18)	-	-	-	-	-	-	-	-	-	-	-	-	-	-	-	-	-	-
3	95281784	C	T	Prune	ENSMUST00000015855.7	c.-161G>A		5_prime_UTR_variant	1	-	-	-	-	-	0.3 (6/20)	-	-	-	-	-	-	-	-	-	-	-	-	-	-	-	-	-	-	-	-	-	-	-	-	-	-	-	-	-	-	-	-	-	-
3	95281784	C	T	Fam63a	ENSMUSG00000038712	n.95281784C>T		intragenic_variant	1	-	-	-	-	-	0.3 (6/20)	-	-	-	-	-	-	-	-	-	-	-	-	-	-	-	-	-	-	-	-	-	-	-	-	-	-	-	-	-	-	-	-	-	-
3	95529436	G	T	Ctss	ENSMUST00000015667.8	c.29G>T	p.Arg10Ile	missense_variant&splice_region_variant	2	-	-	-	-	-	-	-	-	-	-	-	-	-	-	-	-	-	-	-	-	-	-	-	-	-	-	-	-	-	-	-	-	-	-	0.1358 (55/405)	-	-	-	-	-
3	95832615	C	T	Prpf3	ENSMUST00000015892.13	c.1851G>A	p.Glu617Glu	synonymous_variant	1	-	-	-	-	-	-	-	-	-	-	-	-	-	-	-	-	-	-	-	-	-	-	-	-	-	-	-	-	-	-	-	-	-	-	-	-	-	-	-	-
3	96598307	G	C	Ankrd34a	ENSMUST00000058943.7	c.826G>C	p.Gly276Arg	missense_variant	1	-	-	-	-	-	-	-	-	-	-	-	-	-	-	-	-	-	-	-	-	-	-	-	-	-	-	-	-	-	-	-	-	-	-	-	-	-	-	-	-
3	96607845	G	A	Lix1l	ENSMUST00000062058.4	c.292+6372G>A		intron_variant	1	-	-	-	-	-	-	-	-	-	-	-	-	-	-	-	-	-	-	-	-	-	-	-	-	-	-	-	-	-	-	-	-	-	-	-	-	-	-	-	-
3	96607845	G	A	6330549D23Rik	ENSMUST00000160818.1	n.2042C>T		non_coding_transcript_exon_variant	1	-	-	-	-	-	-	-	-	-	-	-	-	-	-	-	-	-	-	-	-	-	-	-	-	-	-	-	-	-	-	-	-	-	-	-	-	-	-	-	-
3	97867951	G	T	Pde4dip	ENSMUST00000090750.11	c.182+20538C>A		intron_variant	1	-	-	-	-	-	-	-	-	-	-	-	-	-	-	-	-	-	-	-	-	-	-	-	-	-	-	-	-	-	-	-	-	-	-	-	-	-	-	-	-
3	101457948	C	T	Igsf3	ENSMUST00000195164.1	c.3234C>T	p.Leu1078Leu	synonymous_variant	1	-	-	-	-	-	-	-	-	-	-	-	-	-	-	-	-	0.3077 (4/13)	-	-	-	-	-	-	-	-	-	-	-	-	-	-	-	-	-	-	-	-	-	-	-
3	101577011	C	T	Atp1a1	ENSMUST00000036493.7	c.2952-1G>A		splice_acceptor_variant&intron_variant	1	-	-	-	-	-	-	-	-	-	-	-	-	-	-	-	-	-	-	-	-	-	-	-	-	-	-	-	-	-	-	-	-	-	-	-	-	-	-	-	-
3	101595085	A	G	Atp1a1	ENSMUST00000036493.7	c.36T>C	p.Pro12Pro	synonymous_variant	1	-	-	-	-	-	-	-	-	-	-	-	-	-	-	-	-	-	-	-	-	-	-	-	-	-	-	-	-	-	-	-	-	-	-	-	-	-	-	-	-
3	102941057	A	C	Nr1h5	ENSMUST00000058899.12	c.1331T>G	p.Leu444Arg	missense_variant	1	-	-	-	-	-	-	-	-	-	-	-	-	-	-	-	-	-	-	-	-	-	-	-	-	-	-	-	-	-	-	-	-	-	-	-	-	-	-	-	-
3	103969802	C	CAGATTA	Phtf1	ENSMUST00000063717.13	c.97_102dupATTAAG		splice_donor_variant&intron_variant	1	-	-	-	-	-	-	-	-	-	-	-	-	-	-	-	-	-	-	-	-	-	-	-	-	-	-	-	-	-	-	-	-	-	-	-	-	-	-	-	-
3	104652846	G	A	Slc16a1	ENSMUST00000046212.1	c.466G>A	p.Val156Met	missense_variant	2	-	-	-	-	-	-	-	-	-	-	-	-	-	-	-	-	-	-	-	-	-	-	-	-	-	-	-	-	-	-	-	-	-	-	-	-	-	-	-	-
3	104796994	G	A	Mov10	ENSMUST00000106775.7	c.2706C>T	p.Gly902Gly	synonymous_variant	1	-	-	-	-	-	-	-	-	-	-	-	-	-	-	-	-	-	-	-	-	-	-	-	-	-	-	-	-	-	-	-	-	-	-	-	-	-	-	-	-
3	106147803	T	G	Chil3	ENSMUST00000063062.8	c.*50A>C		3_prime_UTR_variant	1	-	-	-	-	-	-	-	-	-	-	-	-	-	-	-	-	-	-	-	-	-	-	-	-	-	-	-	-	-	-	-	-	-	-	-	-	-	-	-	-
3	106219493	T	A	Chil4	ENSMUST00000082219.5	c.-29A>T		5_prime_UTR_premature_start_codon_gain_variant&5_prime_UTR_variant	1	-	-	-	-	-	-	-	-	-	-	-	-	-	-	-	-	-	-	-	-	-	-	-	-	-	-	-	-	-	-	-	0.1938 (62/320)	-	-	-	-	-	-	-	-
3	106499721	C	A	Dennd2d	ENSMUST00000183271.1	c.1121-34C>A		intron_variant	1	-	-	-	-	-	-	-	-	-	-	-	-	-	-	-	-	-	-	-	-	-	-	-	-	-	-	-	-	-	-	-	-	-	-	-	-	-	-	-	-
3	107311516	C	CT	Slc16a4	ENSMUST00000029502.13	c.1440dupT	p.Val481fs	frameshift_variant	1	-	-	-	-	-	-	-	-	-	-	-	-	-	-	-	-	-	-	-	-	-	-	-	-	-	-	-	-	-	-	-	-	-	-	-	-	-	-	-	-
3	107753906	G	T	Csf1	ENSMUST00000014743.9	c.226-4C>A		splice_region_variant&intron_variant	1	-	-	-	-	-	-	-	-	-	-	-	-	-	-	-	-	-	-	-	-	-	-	-	-	-	-	-	-	-	-	-	-	-	-	-	-	-	-	-	-
3	107756691	T	A	Csf1	ENSMUST00000014743.9	c.88A>T	p.Ser30Cys	missense_variant	1	-	-	-	-	-	-	-	-	-	0.3403 (65/191)	-	-	-	-	-	-	-	-	-	-	-	-	-	-	-	-	-	-	-	-	-	-	-	-	-	-	-	-	-	-
3	109163559	G	A	Slc25a24	ENSMUST00000029477.10	c.1233G>A	p.Met411Ile	missense_variant	2	-	-	-	-	-	-	-	-	-	-	-	-	-	-	-	-	-	-	-	-	-	-	-	-	0.3864 (34/88)	-	-	-	-	-	-	0.4286 (24/56)	-	-	-	-	-	-	-	-
3	115122604	G	C	Olfm3	ENSMUST00000051309.8	c.1184G>C	p.Gly395Ala	missense_variant	1	-	-	-	-	-	-	-	-	-	-	-	-	-	-	-	-	-	-	-	-	-	-	-	-	-	-	-	-	-	-	-	-	-	-	-	-	-	-	-	-
3	116252231	T	C	Gpr88	ENSMUST00000090473.6	c.430A>G	p.Arg144Gly	missense_variant	1	-	-	-	-	-	-	-	-	-	-	-	-	-	-	-	-	-	-	-	-	0.28 (7/25)	-	-	-	-	-	-	-	-	-	-	-	-	-	-	-	-	-	-	-
3	119431538	A	G	Dpyd	ENSMUST00000039177.11	c.2959A>G	p.Thr987Ala	missense_variant	1	-	-	-	-	-	-	-	-	-	-	-	-	-	-	-	-	-	-	-	-	-	-	0.4194 (26/62)	-	-	-	-	-	-	-	-	-	-	-	-	-	-	-	-	-
3	121171552	C	A	Rwdd3	ENSMUST00000106467.7	c.85+40G>T		intron_variant	1	-	-	-	-	-	-	-	-	0.4545 (10/22)	-	-	-	-	-	-	-	-	-	-	-	-	-	-	-	-	-	-	-	-	-	-	-	-	-	-	-	-	-	-	-
3	122166823	T	C	Abca4	ENSMUST00000013995.12	c.6144+34T>C		intron_variant	1	-	-	-	-	-	-	-	-	-	-	-	-	-	-	-	-	-	-	-	-	-	-	-	-	-	-	-	-	-	-	-	-	-	-	-	-	-	-	-	-
3	122166823	T	C	Gm43158	ENSMUST00000198484.1	n.1493-41655A>G		intron_variant	1	-	-	-	-	-	-	-	-	-	-	-	-	-	-	-	-	-	-	-	-	-	-	-	-	-	-	-	-	-	-	-	-	-	-	-	-	-	-	-	-
3	122957712	A	AT	Usp53	ENSMUST00000090379.6	c.694dupA	p.Ile232fs	frameshift_variant	2	-	-	-	-	-	-	-	-	-	-	0.1818 (4/22)	-	-	-	-	-	-	-	-	-	-	-	-	-	-	-	-	-	-	-	-	-	-	-	-	-	-	-	-	-
3	127546495	G	T	Larp7	ENSMUST00000029588.9	c.609C>A	p.Ile203Ile	synonymous_variant	2	-	-	-	-	-	-	-	-	-	-	-	-	-	-	-	-	-	-	-	-	-	-	-	-	-	-	-	-	-	-	-	-	-	-	-	-	-	-	-	-
3	127796757	C	T	Tifa	ENSMUST00000054483.13	c.176C>T	p.Thr59Met	missense_variant	1	-	-	-	-	-	-	-	-	-	-	-	-	-	-	-	-	-	-	-	-	-	-	-	-	-	-	-	-	-	-	-	-	-	-	-	-	-	-	-	-
3	129717907	T	TA	Egf	ENSMUST00000029653.6	c.1593+16dupT		intron_variant	1	-	-	-	-	-	-	-	-	-	-	-	-	0.2 (4/20)	-	-	-	-	-	-	-	-	-	-	-	-	-	-	-	-	-	-	-	-	-	-	-	-	-	-	-
3	131115545	C	A	Lef1	ENSMUST00000029611.13	c.407C>A	p.Thr136Lys	missense_variant&splice_region_variant	3	-	-	-	-	-	-	-	-	-	-	-	-	-	-	-	-	-	-	-	-	-	-	-	-	-	-	-	-	-	-	-	-	-	-	-	-	-	-	-	-
3	131564962	G	T	Papss1	ENSMUST00000029666.13	c.39G>T	p.Leu13Leu	synonymous_variant	1	-	-	-	-	-	-	-	-	-	-	-	-	-	-	-	-	-	-	-	-	-	-	-	-	-	-	-	-	-	-	-	-	-	-	-	-	-	-	-	-
3	138174670	G	A	4930579F01Rik	ENSMUST00000012186.8	c.562+42C>T		intron_variant	1	-	-	-	-	-	-	-	-	-	-	-	-	-	-	-	-	-	-	-	-	-	-	-	-	-	-	-	-	-	-	-	-	-	-	-	-	-	-	-	-
3	138428001	TG	T	Adh4	ENSMUST00000013458.8	c.876delG	p.Ser293fs	frameshift_variant	1	-	-	-	-	-	-	-	-	-	-	-	-	0.1771 (17/96)	-	-	-	-	-	-	-	-	-	-	-	-	-	-	-	-	-	-	-	-	-	-	-	-	-	-	-
3	139649680	C	G	Stpg2	ENSMUST00000062306.6	c.1537-51945C>G		intron_variant	1	-	-	-	-	-	-	-	-	-	-	-	-	-	-	-	-	-	-	-	-	-	-	-	-	-	-	-	-	-	-	-	-	-	-	-	-	-	-	-	-
3	139649680	C	G	Gm2451	ENSMUST00000199447.1	n.302C>G		non_coding_transcript_exon_variant	1	-	-	-	-	-	-	-	-	-	-	-	-	-	-	-	-	-	-	-	-	-	-	-	-	-	-	-	-	-	-	-	-	-	-	-	-	-	-	-	-
3	139649721	A	C	Stpg2	ENSMUST00000062306.6	c.1537-51904A>C		intron_variant	1	-	-	-	-	-	-	-	-	-	-	-	-	-	-	-	0.1471 (5/34)	-	-	-	-	-	-	-	-	-	-	-	-	-	-	-	-	-	-	-	-	-	-	-	-
3	139649721	A	C	Gm2451	ENSMUST00000199447.1	n.343A>C		non_coding_transcript_exon_variant	1	-	-	-	-	-	-	-	-	-	-	-	-	-	-	-	0.1471 (5/34)	-	-	-	-	-	-	-	-	-	-	-	-	-	-	-	-	-	-	-	-	-	-	-	-
3	144817921	A	G	Clca3a2	ENSMUST00000029929.11	c.300+2T>C		splice_donor_variant&intron_variant	1	-	-	-	-	-	-	-	-	-	-	-	-	-	-	-	-	-	-	-	-	-	-	-	-	-	-	-	-	-	-	-	-	-	-	-	-	-	-	-	-
3	145124232	T	G	Odf2l	ENSMUST00000098538.8	c.-37T>G		5_prime_UTR_variant	1	-	-	-	-	-	-	-	-	-	-	-	-	-	-	-	-	-	-	-	-	-	-	-	-	-	-	-	-	-	-	-	-	-	-	0.1429 (4/28)	-	-	-	-	-
3	145126167	C	T	Odf2l	ENSMUST00000098538.8	c.182C>T	p.Ser61Leu	missense_variant	2	-	-	-	-	-	-	-	-	-	-	-	-	-	-	-	-	-	-	-	-	-	-	-	-	-	-	-	-	-	-	-	-	-	-	-	0.3137 (32/102)	-	-	-	-
3	145298801	T	G	Col24a1	ENSMUST00000029848.4	c.57-18T>G		intron_variant	1	-	-	-	-	-	-	-	-	-	-	-	-	-	-	-	-	-	-	-	-	-	-	-	-	-	-	-	-	-	-	-	-	-	-	-	-	-	-	-	-
3	150073052	T	C	Rpsa-ps10	ENSMUST00000057740.6	n.491A>G		non_coding_transcript_exon_variant	1	-	-	-	-	-	-	-	-	-	-	0.1481 (4/27)	-	-	-	-	-	-	-	-	-	-	-	-	-	-	-	-	-	-	-	-	-	-	-	-	-	-	-	-	-
3	150073419	T	C	Rpsa-ps10	ENSMUST00000057740.6	n.124A>G		non_coding_transcript_exon_variant	1	-	-	-	-	-	-	-	-	-	-	-	-	-	-	-	-	-	-	-	-	-	-	-	-	-	-	-	-	-	-	-	-	-	-	-	-	-	-	-	-
3	152252840	T	C	Nexn	ENSMUST00000199423.4	c.415A>G	p.Ile139Val	missense_variant	1	-	-	-	-	-	-	-	-	-	-	-	-	-	-	-	-	-	-	-	-	-	-	-	-	-	-	-	-	-	-	-	-	-	-	-	-	-	-	-	-
3	158040576	C	T	Lrrc40	ENSMUST00000072080.9	c.287C>T	p.Ser96Phe	missense_variant	1	-	-	-	-	-	-	-	-	-	-	-	-	-	-	-	-	-	-	-	-	-	-	-	-	-	-	-	-	-	-	-	-	-	-	-	-	-	-	-	-
4	6204608	C	A	Ubxn2b	ENSMUST00000029907.5	c.468C>A	p.Asp156Glu	missense_variant	2	-	-	-	-	-	-	-	-	0.1842 (7/38)	-	-	-	-	-	-	-	-	-	-	-	-	-	-	-	-	-	-	-	-	-	0.2941 (5/17)	-	-	-	-	-	-	-	-	-
4	11817123	C	G	Cdh17	ENSMUST00000029871.11	c.*49C>G		3_prime_UTR_variant	1	-	-	-	-	-	-	-	-	-	-	-	-	-	-	-	-	-	-	-	-	-	-	-	-	-	-	-	-	-	-	-	-	-	-	-	-	-	-	-	-
4	16006496	A	G	Osgin2	ENSMUST00000037198.9	c.200-3T>C		splice_region_variant&intron_variant	1	-	-	-	-	-	-	-	-	-	-	-	-	-	-	-	-	-	-	-	-	-	-	-	-	-	-	-	-	-	-	-	-	-	-	-	-	-	-	-	-
4	21873731	A	T	Pnisr	ENSMUST00000029911.11	c.1473A>T	p.Ser491Ser	synonymous_variant	1	-	-	-	-	-	-	-	-	-	-	-	-	-	-	-	-	-	-	-	-	-	-	-	-	-	-	-	-	-	-	-	-	-	-	-	-	-	-	-	-
4	32644255	G	GA	Casp8ap2	ENSMUST00000029950.9	c.3336dupA	p.Leu1113fs	frameshift_variant	1	-	-	-	-	-	-	-	-	-	-	-	-	-	-	-	-	-	-	-	-	-	-	-	-	-	-	-	-	-	-	-	-	-	-	-	-	-	-	-	-
4	32674968	C	CA	Mdn1	ENSMUST00000071642.10	c.1761dupA	p.Leu588fs	frameshift_variant	2	-	-	-	-	-	-	-	-	-	-	-	-	-	-	-	-	-	-	-	-	-	-	-	-	-	-	-	-	-	-	-	-	-	-	-	-	-	-	-	-
4	32722362	C	CT	Mdn1	ENSMUST00000071642.10	c.7149dupT	p.Glu2384fs	frameshift_variant&stop_gained	1	-	-	-	-	-	-	-	-	-	-	-	-	-	-	-	-	-	-	-	-	-	-	-	-	-	-	-	0.2 (4/20)	-	-	-	-	-	-	-	-	-	-	-	-
4	32817115	G	A	Ankrd6	ENSMUST00000035719.10	c.1030-19C>T		intron_variant	1	-	-	-	-	-	0.3158 (18/57)	-	-	-	-	-	-	-	-	-	-	-	-	-	-	-	-	-	-	-	-	-	-	-	-	-	-	-	-	-	-	-	-	-	-
4	34808203	C	CT	Zfp292	ENSMUST00000047950.5	c.4854dupA	p.Val1619fs	frameshift_variant	1	-	-	-	-	-	-	-	-	-	-	-	-	-	-	-	-	-	-	-	-	-	-	-	-	-	-	-	-	-	-	-	-	0.1667 (6/36)	-	-	-	-	-	-	-
4	40724050	G	T	Dnaja1	ENSMUST00000030118.9	c.210G>T	p.Gln70His	missense_variant	1	-	-	-	-	-	-	-	-	-	-	-	-	-	-	-	-	-	-	-	-	-	-	-	-	-	-	-	0.3805 (43/113)	-	-	-	-	-	-	-	-	-	-	-	-
4	41717422	G	A	Dctn3	ENSMUST00000030158.10	c.287C>T	p.Ser96Phe	missense_variant	1	-	-	-	-	-	-	-	-	-	-	-	-	-	-	-	-	-	-	-	-	-	-	-	-	-	-	-	-	-	-	-	-	-	-	-	-	-	-	-	-
4	41717422	G	A	Il11ra1	ENSMUSG00000073889	n.41717422G>A		intragenic_variant	1	-	-	-	-	-	-	-	-	-	-	-	-	-	-	-	-	-	-	-	-	-	-	-	-	-	-	-	-	-	-	-	-	-	-	-	-	-	-	-	-
4	41773493	A	C	Ccl27a	ENSMUST00000108036.7	c.79T>G	p.Trp27Gly	missense_variant	2	-	-	-	-	-	-	-	-	-	-	-	-	-	-	-	-	-	-	-	-	-	-	-	-	-	-	-	-	-	-	-	-	-	-	-	-	-	-	-	-
4	42939638	CCT	C	Phf24	ENSMUST00000107975.7	c.*54_*55delCT		3_prime_UTR_variant	1	-	-	-	-	-	-	-	-	-	-	-	-	-	-	-	-	-	-	-	-	-	-	-	-	-	-	-	-	-	-	-	-	-	-	-	-	-	-	-	-
4	42971806	A	G	1700022I11Rik	ENSMUST00000030163.11	c.1138A>G	p.Thr380Ala	missense_variant	1	-	-	-	-	-	-	-	-	-	-	-	-	-	-	-	-	-	-	-	-	-	-	-	-	-	-	-	-	-	-	-	-	-	-	-	-	-	-	-	-
4	43571200	G	A	Gba2	ENSMUST00000030189.13	c.748C>T	p.His250Tyr	missense_variant	1	-	-	-	-	-	-	-	-	-	-	-	-	-	-	-	-	-	-	-	-	-	-	-	-	-	-	-	-	-	-	-	-	-	-	-	-	-	-	-	-
4	44762184	G	GA	Zcchc7	ENSMUST00000107824.8	c.317dupA	p.Asn106fs	frameshift_variant	2	-	-	-	-	-	-	-	-	-	-	-	-	-	-	-	-	-	-	-	-	-	-	-	-	-	-	-	-	-	-	-	-	-	-	-	-	-	-	-	-
4	44981405	C	T	Grhpr	ENSMUST00000045078.12	c.-47C>T		5_prime_UTR_premature_start_codon_gain_variant&5_prime_UTR_variant	1	-	-	-	-	-	-	-	-	-	-	-	-	-	-	-	-	-	-	-	-	-	-	-	-	-	-	-	-	-	-	-	-	-	-	-	-	-	-	-	-
4	44993651	T	C	Zbtb5	ENSMUST00000055028.8	c.1732A>G	p.Thr578Ala	missense_variant	1	-	-	-	-	-	-	-	-	-	0.3333 (5/15)	-	-	-	-	-	-	-	-	-	-	-	-	-	-	-	-	-	-	-	-	-	-	-	-	-	-	-	-	-	-
4	46396531	G	C	Hemgn	ENSMUST00000071096.2	c.704C>G	p.Ala235Gly	missense_variant	1	-	-	-	-	-	-	-	-	-	-	-	-	-	-	-	-	-	-	-	-	-	-	-	-	-	-	-	-	-	-	-	-	-	-	-	-	-	-	-	-
4	48429686	C	CA	Invs	ENSMUST00000030029.9	c.3173dupA	p.Asn1058fs	frameshift_variant	1	-	-	-	-	-	-	-	-	-	-	-	-	-	-	-	-	-	-	-	-	-	-	-	-	-	-	-	-	-	-	-	-	-	-	0.2381 (5/21)	-	-	-	-	-
4	52451044	A	G	Smc2	ENSMUST00000102915.9	c.861A>G	p.Arg287Arg	synonymous_variant	1	-	-	-	-	-	-	-	-	-	-	-	-	-	-	-	-	-	-	0.3158 (24/76)	-	-	-	-	-	-	-	-	-	-	-	-	-	-	-	-	-	-	-	-	-
4	56744083	C	T	Actl7a	ENSMUST00000095079.5	c.609C>T	p.Ile203Ile	synonymous_variant	1	-	-	-	-	-	-	-	-	-	-	-	-	-	-	-	-	-	-	-	-	-	-	-	-	-	-	-	-	-	-	-	-	-	-	-	-	-	-	-	-
4	58070326	C	T	Svep1	ENSMUST00000042850.8	c.7459G>A	p.Gly2487Arg	missense_variant	1	-	-	-	-	-	-	-	-	-	-	-	-	-	-	-	-	-	-	-	-	-	-	-	-	-	-	-	-	-	-	-	-	-	-	-	-	-	-	-	-
4	62192522	G	GT	Zfp37	ENSMUST00000068822.3	c.426dupA	p.Leu143fs	frameshift_variant	2	-	-	-	-	0.1667 (4/24)	-	-	-	-	-	-	-	-	-	-	-	-	-	-	-	-	-	-	-	-	-	-	-	-	-	-	-	-	-	-	-	-	-	-	-
4	63395554	C	G	Akna	ENSMUST00000035724.4	c.331G>C	p.Asp111His	missense_variant	1	0.1017 (6/59)	-	-	-	-	-	-	-	-	-	-	-	-	-	-	-	-	-	-	-	-	-	-	-	-	-	-	-	-	-	-	-	-	-	-	-	-	-	-	-
4	64017857	C	A	Tnc	ENSMUST00000107372.7	c.841G>T	p.Glu281*	stop_gained	1	-	-	-	-	-	-	-	-	-	-	-	-	-	0.125 (4/32)	-	-	-	-	-	-	-	-	-	-	-	-	-	-	-	-	-	-	-	-	-	-	-	-	-	-
4	64017857	C	A	8030451A03Rik	ENSMUST00000141428.7	n.137-6119C>A		intron_variant	1	-	-	-	-	-	-	-	-	-	-	-	-	-	0.125 (4/32)	-	-	-	-	-	-	-	-	-	-	-	-	-	-	-	-	-	-	-	-	-	-	-	-	-	-
4	65156606	G	A	Pappa	ENSMUST00000084501.3	c.1396G>A	p.Asp466Asn	missense_variant	1	-	-	-	-	-	-	-	-	-	-	-	-	-	-	-	-	-	-	-	-	-	-	-	-	-	-	-	-	-	-	-	-	-	-	-	-	-	-	-	-
4	73404217	T	G	Gm11487	ENSMUST00000084480.5	c.48A>C	p.Glu16Asp	missense_variant	1	-	-	-	-	-	-	-	-	-	-	-	-	-	-	-	-	-	-	-	-	-	-	-	-	-	-	-	-	-	-	-	-	-	-	-	-	-	-	-	-
4	74187529	C	A	Frmd3	ENSMUST00000084474.5	c.1411C>A	p.Leu471Ile	missense_variant	1	-	-	-	-	-	-	-	-	-	-	-	-	-	-	-	-	-	-	-	-	-	-	-	-	-	-	-	-	-	-	-	-	-	-	-	-	-	-	-	-
4	83297933	G	C	Ttc39b	ENSMUST00000102823.9	c.72C>G	p.Ile24Met	missense_variant	1	-	-	-	-	-	-	-	-	-	-	-	-	-	-	-	-	-	-	-	-	-	-	-	-	-	-	-	-	-	-	-	-	-	-	-	-	-	-	-	-
4	83463554	T	TA	Psip1	ENSMUST00000030207.14	c.971+40dupT		intron_variant	1	-	-	-	-	-	-	-	-	-	-	-	-	-	-	-	0.1471 (5/34)	-	-	-	-	-	-	-	-	-	-	-	-	-	-	-	-	-	-	-	-	-	-	-	-
4	83463554	T	TA	Snapc3	ENSMUSG00000028483	n.83463560dupA		intragenic_variant	1	-	-	-	-	-	-	-	-	-	-	-	-	-	-	-	0.1471 (5/34)	-	-	-	-	-	-	-	-	-	-	-	-	-	-	-	-	-	-	-	-	-	-	-	-
4	85398969	T	G	Sh3gl2	ENSMUST00000107188.9	c.1275T>G	p.Thr425Thr	synonymous_variant	1	-	-	-	-	-	-	-	-	0.3214 (9/28)	-	-	-	-	-	-	-	-	-	-	-	-	-	-	-	-	-	-	-	-	-	-	-	-	-	-	-	-	-	-	-
4	86799418	C	CA	Dennd4c	ENSMUST00000082026.13	c.1658dupA	p.Met554fs	frameshift_variant	1	-	-	-	-	-	-	-	-	-	-	-	-	-	-	-	-	-	-	-	-	-	-	-	-	-	-	-	-	-	-	-	-	-	-	-	-	-	-	-	-
4	86857406	A	C	Rps6	ENSMUST00000102814.4	c.-80T>G		5_prime_UTR_variant	1	-	-	-	-	-	-	-	-	-	-	-	-	-	-	-	-	-	-	-	-	-	-	-	-	-	-	-	-	-	-	-	-	-	-	-	-	-	-	-	-
4	88603191	G	A	Ifna12	ENSMUST00000102806.1	c.118C>T	p.Leu40Phe	missense_variant	1	-	-	-	-	-	-	-	-	-	-	-	-	-	-	-	-	-	-	-	-	-	-	-	-	-	-	-	-	-	-	-	-	-	-	-	-	-	-	-	-
4	88720027	A	AC	Klhl9	ENSMUST00000094993.2	c.*121dupG		3_prime_UTR_variant	1	-	-	-	-	-	-	-	-	-	-	-	-	-	-	-	-	-	-	-	-	-	-	-	-	-	-	-	-	-	-	-	-	-	-	-	-	-	-	-	-
4	92191131	T	C	Gm12666	ENSMUST00000123179.1	c.452A>G	p.Gln151Arg	missense_variant	1	-	-	-	-	-	-	-	-	-	-	-	-	-	-	-	-	-	-	-	-	-	-	-	-	-	-	-	-	-	-	-	-	-	-	-	-	-	-	-	-
4	94550479	G	GT	Caap1	ENSMUST00000030313.8	c.471dupA	p.Leu158fs	frameshift_variant	1	-	-	-	-	-	-	-	-	-	-	-	-	-	-	-	-	-	-	-	-	-	-	-	-	-	-	-	-	-	-	-	-	-	-	-	-	-	-	-	-
4	94799219	T	C	Tek	ENSMUST00000102798.7	c.568T>C	p.Ser190Pro	missense_variant	1	-	-	-	-	-	-	-	-	-	-	-	-	-	-	-	-	-	-	-	-	-	-	-	-	-	-	-	-	-	-	-	-	-	-	0.3571 (5/14)	-	-	-	-	-
4	96518213	G	GA	Cyp2j6	ENSMUST00000030303.5	c.1328-9dupT		intron_variant	1	-	-	-	-	-	-	-	-	-	-	-	-	-	-	-	-	-	-	-	-	-	-	-	-	-	-	-	-	-	-	-	-	-	-	-	-	-	-	-	-
4	96577664	C	G	Cyp2j9	ENSMUST00000055693.8	c.931G>C	p.Ala311Pro	missense_variant	1	-	-	-	-	-	-	-	-	-	-	-	-	-	-	-	-	-	-	-	-	-	-	-	-	-	-	-	-	-	-	-	-	-	-	-	-	-	-	-	-
4	98736514	C	A	L1td1	ENSMUST00000173659.1	c.945C>A	p.Phe315Leu	missense_variant	1	-	-	-	-	-	-	-	-	-	-	-	-	-	-	-	-	-	-	-	-	-	-	-	-	-	-	-	-	-	-	-	-	-	-	-	-	-	-	-	-
4	99658537	C	CA	Foxd3	ENSMUST00000087285.4	c.*511dupA		3_prime_UTR_variant	2	-	-	-	-	-	-	-	-	-	-	-	-	-	-	-	-	-	-	-	-	-	-	-	-	-	-	-	-	-	-	-	-	-	-	-	-	-	-	-	-
4	101157046	A	C	Jak1	ENSMUST00000102781.9	c.2870T>G	p.Phe957Cys	missense_variant	2	-	-	-	-	-	-	-	-	-	0.7234 (204/282)	-	-	-	-	-	-	-	-	-	-	-	-	-	-	-	-	-	-	-	-	-	-	-	-	0.5071 (215/424)	-	-	-	-	-
4	101157867	A	G	Jak1	ENSMUST00000102781.9	c.2726T>C	p.Leu909Pro	missense_variant	2	-	-	-	-	-	-	-	-	-	-	-	-	-	-	-	-	0.6162 (175/284)	-	-	-	-	-	-	-	-	-	-	-	-	-	-	-	-	-	-	-	-	-	-	-
4	101157910	G	T	Jak1	ENSMUST00000102781.9	c.2683C>A	p.Pro895Thr	missense_variant	2	-	-	-	-	-	-	-	-	-	-	-	-	-	-	-	-	0.6254 (192/307)	-	-	-	-	-	-	-	-	-	-	-	-	-	-	-	-	-	-	-	-	-	-	-
4	103039284	T	G	Wdr78	ENSMUST00000106868.3	c.*7A>C		3_prime_UTR_variant	1	-	-	-	-	-	-	-	-	-	-	-	-	-	-	-	-	-	-	-	-	-	-	-	-	-	-	-	-	-	-	-	-	-	-	-	-	-	0.2828 (28/99)	-	-
4	104688321	T	C	Dab1	ENSMUST00000106830.8	c.664-62T>C		intron_variant	1	-	-	-	-	-	-	-	-	-	-	-	-	-	-	-	-	-	-	-	-	-	-	-	-	-	-	-	-	-	-	-	-	-	-	-	-	-	-	-	-
4	104804108	A	C	C8b	ENSMUST00000031663.9	c.1718A>C	p.His573Pro	missense_variant	1	-	-	-	-	-	-	-	-	-	-	-	-	-	0.1667 (7/42)	-	-	-	-	-	-	-	-	-	-	-	-	-	-	-	-	-	-	-	-	-	-	-	-	-	-
4	108184506	AAG	A	Zyg11a	ENSMUST00000043793.6	c.1942-14_1942-13delCT		intron_variant	1	-	-	-	-	-	-	-	-	-	-	-	-	-	-	-	-	-	-	-	-	-	-	-	-	-	-	-	-	-	-	-	-	-	-	-	-	-	-	-	-
4	108719375	T	A	Zfyve9	ENSMUST00000106657.7	c.508A>T	p.Asn170Tyr	missense_variant	1	-	-	-	-	-	-	-	-	-	-	-	-	-	-	-	-	-	-	-	-	-	-	-	-	-	-	-	-	-	-	-	-	-	-	-	-	-	-	-	-
4	111928738	A	G	Skint8	ENSMUST00000165046.1	c.380A>G	p.Asp127Gly	missense_variant	1	-	0.1724 (5/29)	-	-	-	-	-	-	-	-	-	-	-	-	-	-	-	-	-	-	-	-	-	-	-	-	-	-	-	-	-	-	-	-	-	-	-	-	-	-
4	111928775	C	T	Skint8	ENSMUST00000165046.1	c.417C>T	p.Asn139Asn	synonymous_variant	1	-	-	-	-	-	-	-	-	-	-	-	-	-	-	-	-	-	-	-	-	-	-	-	-	-	-	-	-	-	-	-	-	-	-	-	-	-	-	-	-
4	112165640	GAA	G	Skint4	ENSMUST00000106566.1	c.1373-40_1373-39delAA		intron_variant	1	-	-	-	-	-	-	-	-	-	-	-	-	-	-	-	-	-	-	-	-	-	-	-	-	-	-	-	-	-	-	-	-	-	-	-	-	-	-	-	-
4	114969332	C	G	Cmpk1	ENSMUST00000030491.8	c.201G>C	p.Glu67Asp	missense_variant	1	-	-	-	-	-	-	-	-	-	-	-	-	-	-	-	-	-	-	-	-	-	-	-	-	-	-	-	-	-	-	-	-	-	-	-	-	-	-	-	-
4	115328920	C	A	Cyp4a12a	ENSMUST00000084343.3	c.1282-6C>A		splice_region_variant&intron_variant	1	-	-	-	-	-	-	-	-	-	-	-	-	-	-	-	-	-	-	-	-	-	-	-	-	-	-	-	-	-	-	-	-	-	-	-	0.6032 (38/63)	-	-	-	-
4	115414466	A	T	Cyp4a12b	ENSMUST00000094887.3	c.377-4A>T		splice_region_variant&intron_variant	1	-	-	-	-	-	-	-	-	-	-	-	-	-	-	-	-	-	-	-	-	-	-	-	-	-	-	-	-	-	-	-	-	-	-	-	-	-	-	-	-
4	116067607	G	A	Uqcrh	ENSMUST00000078676.5	c.238-435C>T		intron_variant	1	-	-	-	-	-	-	-	-	-	-	-	-	-	-	-	-	-	-	-	-	-	-	-	-	-	-	-	-	-	-	-	-	-	-	-	-	-	-	-	-
4	116158534	C	A	Pomgnt1	ENSMUST00000106498.7	c.1761C>A	p.Phe587Leu	missense_variant	1	-	-	-	0.3684 (49/133)	-	-	-	-	-	-	-	-	-	-	-	-	-	-	-	-	-	-	-	-	-	-	-	-	-	-	-	-	-	-	-	-	-	-	-	-
4	116802710	A	AT	Tesk2	ENSMUST00000045542.12	c.1117dupT	p.Ser373fs	frameshift_variant	1	-	-	-	-	-	-	-	-	-	-	-	-	-	-	-	-	-	-	-	-	-	-	-	-	-	-	-	-	-	-	-	-	-	-	-	-	-	-	-	-
4	116802710	A	AT	Toe1	ENSMUSG00000028688	n.116802711dupA		intragenic_variant	1	-	-	-	-	-	-	-	-	-	-	-	-	-	-	-	-	-	-	-	-	-	-	-	-	-	-	-	-	-	-	-	-	-	-	-	-	-	-	-	-
4	117155864	GGCAGCCATGTTGGCCCGCTC	G	Rps8	ENSMUST00000102696.4	c.4+174_5-188delGAGCGGGCCAACATGGCTGC		intron_variant	1	-	-	-	-	-	-	-	-	-	-	-	-	-	-	-	-	-	-	-	-	-	-	-	-	-	-	-	-	-	-	-	-	-	-	-	-	-	-	-	-
4	119198779	T	C	Svbp	ENSMUST00000097908.3	c.223-2118T>C		intron_variant	1	-	-	-	-	-	-	-	-	-	-	-	-	-	-	-	-	-	-	-	-	-	-	-	-	-	-	-	-	-	-	-	-	-	-	-	-	-	-	-	-
4	119232506	C	A	AU022252	ENSMUST00000141112.1	c.80-37G>T		intron_variant	1	-	-	-	-	-	-	-	-	-	-	-	-	-	-	-	-	-	-	-	-	-	-	-	-	-	-	-	-	-	-	-	-	-	-	-	-	-	-	-	-
4	120541947	G	A	Ctps	ENSMUST00000030381.7	c.1607C>T	p.Pro536Leu	missense_variant	1	-	-	-	-	-	-	-	-	-	-	-	-	-	-	-	-	-	-	-	0.2626 (52/198)	-	-	-	-	-	-	-	-	-	-	-	-	-	-	-	-	-	-	-	-
4	120717526	G	A	Kcnq4	ENSMUST00000030376.7	c.340C>T	p.Leu114Leu	synonymous_variant	1	-	-	-	-	-	-	-	-	-	-	-	-	-	-	-	-	-	-	-	-	-	-	-	-	-	-	-	-	-	-	-	-	-	-	-	-	-	-	-	-
4	121016775	T	G	Smap2	ENSMUST00000043200.7	c.77A>C	p.Lys26Thr	missense_variant	1	-	-	-	-	-	-	-	-	-	0.1429 (18/126)	-	-	-	-	-	-	-	-	-	-	-	-	-	-	-	-	-	-	-	-	-	-	-	-	-	-	-	-	-	-
4	123355240	C	G	Macf1	ENSMUST00000097897.10	c.21497G>C	p.Arg7166Thr	missense_variant	2	-	-	-	-	-	-	-	-	-	-	-	-	-	0.425 (17/40)	-	-	-	-	-	-	-	-	-	-	-	-	-	-	-	-	-	-	-	-	-	-	-	-	-	-
4	123471354	A	AT	Macf1	ENSMUST00000097897.10	c.9612dupA	p.Ser3205fs	frameshift_variant	1	-	-	-	-	-	-	-	-	-	-	-	-	-	-	-	-	-	-	-	-	-	-	-	-	-	-	-	-	-	-	-	-	-	-	-	-	-	-	-	-
4	124707285	G	A	Fhl3	ENSMUST00000038684.5	c.363G>A	p.Thr121Thr	synonymous_variant	1	-	-	-	-	-	-	-	-	-	-	-	-	-	-	-	-	-	-	-	-	-	-	-	-	-	-	-	-	-	-	-	-	-	-	-	-	-	-	-	-
4	124708051	A	G	Fhl3	ENSMUST00000038684.5	c.*81A>G		3_prime_UTR_variant	2	-	-	-	-	-	-	-	-	-	-	-	-	-	-	-	-	-	-	-	-	-	-	-	-	-	-	-	-	-	-	-	-	-	-	-	-	-	-	-	-
4	126847128	C	T	AU040320	ENSMUST00000102607.9	c.2654-13C>T		intron_variant	1	-	-	-	-	-	-	-	-	-	-	-	-	-	-	-	-	-	-	-	-	-	-	-	-	-	-	-	-	-	-	-	-	-	-	-	-	-	-	-	-
4	127049307	C	CA	Zmym1	ENSMUST00000055013.9	c.1286dupT	p.Leu429fs	frameshift_variant	2	-	-	-	-	-	-	-	-	-	-	-	-	-	-	-	-	-	-	-	-	-	-	-	-	-	-	-	-	-	-	-	-	-	-	-	-	-	-	-	-
4	127049307	C	CA	Gm12940	ENSMUST00000137236.1	n.1885dupA		non_coding_transcript_exon_variant	2	-	-	-	-	-	-	-	-	-	-	-	-	-	-	-	-	-	-	-	-	-	-	-	-	-	-	-	-	-	-	-	-	-	-	-	-	-	-	-	-
4	128472728	G	C	Csmd2	ENSMUST00000184063.2	c.5218G>C	p.Glu1740Gln	missense_variant&splice_region_variant	1	-	-	-	-	-	-	-	-	-	-	-	-	-	-	-	-	-	-	-	-	0.2407 (13/54)	-	-	-	-	-	-	-	-	-	-	-	-	-	-	-	-	-	-	-
4	129082884	A	G	Rnf19b	ENSMUST00000030584.10	c.1736+6A>G		splice_region_variant&intron_variant	1	-	-	-	-	-	-	-	-	-	-	-	-	-	-	-	-	-	-	-	-	-	-	-	-	-	-	-	-	-	-	-	-	-	-	-	-	-	-	-	-
4	129108385	C	T	Tmem54	ENSMUST00000106064.9	c.191C>T	p.Ser64Phe	missense_variant	2	-	-	-	-	-	-	-	-	-	-	-	-	-	-	-	-	-	-	-	-	-	-	-	-	-	-	-	-	-	-	-	-	-	-	-	-	-	-	-	-
4	129182410	A	C	S100pbp	ENSMUST00000049081.11	c.121T>G	p.Phe41Val	missense_variant	1	-	-	-	-	-	-	-	-	-	-	-	-	-	-	-	-	-	-	-	-	-	-	-	-	-	-	-	0.3889 (21/54)	-	-	-	-	-	-	-	-	-	-	-	-
4	129549018	GA	G	Lck	ENSMUST00000167288.7	c.1361-19delT		intron_variant	1	-	-	-	-	-	-	-	-	-	-	-	-	-	-	-	-	-	-	-	-	-	-	-	-	-	-	-	-	-	-	-	-	-	-	-	-	-	-	-	-
4	130095522	C	CTGTGTG	Col16a1	ENSMUST00000044565.14	c.3985-20_3985-19insGTGTGT		intron_variant	1	-	0.7419 (23/31)	-	-	-	-	-	-	-	-	-	-	-	-	-	-	-	-	-	-	-	-	-	-	-	-	-	-	-	-	-	-	-	-	-	-	-	-	-	-
4	132499291	T	G	Sesn2	ENSMUST00000030724.8	c.491A>C	p.Lys164Thr	missense_variant	2	-	-	-	-	-	-	-	-	-	-	-	-	-	-	-	-	-	-	-	-	-	-	-	-	-	-	-	-	-	-	-	-	-	-	-	-	-	-	-	-
4	132728342	A	C	Xkr8	ENSMUST00000045550.4	c.719T>G	p.Leu240Arg	missense_variant	1	-	-	-	-	-	-	-	-	-	-	-	-	-	-	-	-	-	-	-	-	-	-	-	-	-	-	-	-	-	-	-	-	-	-	-	-	-	-	-	-
4	133000381	T	G	Fgr	ENSMUST00000030693.12	c.*38T>G		3_prime_UTR_variant	1	-	-	-	-	-	0.3 (12/40)	-	-	-	-	-	-	-	-	-	-	-	-	-	-	-	-	-	-	-	-	-	-	-	-	-	-	-	-	-	-	-	-	-	-
4	133680495	G	T	Arid1a	ENSMUST00000145664.8	c.6700C>A	p.Arg2234Arg	synonymous_variant	1	-	-	-	-	-	-	-	-	-	-	-	-	-	-	-	-	-	-	-	-	-	-	-	-	-	-	-	-	-	-	-	-	-	-	-	-	-	-	-	-
4	134545624	C	T	Sepn1	ENSMUST00000060435.6	c.502G>A	p.Ala168Thr	missense_variant	1	-	-	-	-	-	-	-	-	-	-	-	-	-	-	-	-	-	-	-	-	-	-	-	-	-	-	-	-	-	-	-	-	-	-	-	-	-	-	-	0.2432 (9/37)
4	134551574	GC	G	Sepn1	ENSMUST00000060435.6	c.184-41delG		intron_variant	1	-	-	-	-	-	-	-	-	-	-	-	-	-	-	-	-	-	-	-	-	-	-	-	-	-	-	-	-	-	-	-	-	-	-	-	-	-	-	-	-
4	135773778	A	C	Myom3	ENSMUST00000105854.1	c.759A>C	p.Lys253Asn	missense_variant	1	-	-	-	-	-	-	-	-	-	-	-	-	-	-	-	-	-	-	-	-	-	-	-	-	-	-	-	-	-	-	-	-	-	-	-	-	-	-	-	-
4	135920896	C	T	Fuca1	ENSMUST00000030434.4	c.93C>T	p.Asp31Asp	synonymous_variant	1	-	-	-	-	-	-	-	-	-	-	-	-	-	-	-	-	-	-	-	-	-	-	-	-	-	-	-	-	-	-	-	-	-	-	-	-	-	-	-	-
4	136238967	C	T	Asap3	ENSMUST00000047526.7	c.1549C>T	p.Pro517Ser	missense_variant	1	-	-	-	-	-	0.2442 (21/86)	-	-	-	-	-	-	-	-	-	-	-	-	-	-	-	-	-	-	-	-	-	-	-	-	-	-	-	-	-	-	-	-	-	-
4	136931899	T	C	Epha8	ENSMUST00000030420.8	c.2528A>G	p.Asn843Ser	missense_variant	1	-	-	-	-	-	-	-	-	-	-	-	-	-	-	-	-	-	-	-	-	0.1842 (7/38)	-	-	-	-	-	-	-	-	-	-	-	-	-	-	-	-	-	-	-
4	137299525	C	CT	Wnt4	ENSMUST00000045747.4	c.*2760dupT		3_prime_UTR_variant	1	-	-	-	-	-	-	-	-	-	-	-	-	-	-	-	-	-	-	-	-	-	-	-	-	-	-	-	-	-	-	-	-	-	-	-	-	-	-	-	-
4	137552244	T	G	Hspg2	ENSMUST00000171332.1	c.9469T>G	p.Phe3157Val	missense_variant	1	-	-	-	-	-	-	-	-	-	0.1285 (82/638)	-	-	-	-	-	-	-	-	-	-	-	-	-	-	-	-	-	-	-	-	-	-	-	-	-	-	-	-	-	-
4	137568305	C	G	Hspg2	ENSMUST00000171332.1	c.12649C>G	p.Pro4217Ala	missense_variant	1	-	-	-	-	-	-	-	-	-	-	-	-	-	-	-	-	-	0.1439 (102/709)	-	-	-	-	-	-	-	-	-	-	-	-	-	-	-	-	-	-	-	-	-	-
4	137623282	C	G	Usp48	ENSMUST00000055131.12	c.1654C>G	p.Leu552Val	missense_variant	1	-	-	-	-	-	-	-	-	-	-	-	-	-	-	-	-	-	-	-	-	-	-	-	-	-	-	-	-	-	-	-	-	-	-	-	-	-	-	-	-
4	137921027	T	G	Ece1	ENSMUST00000102518.9	c.94T>G	p.Phe32Val	missense_variant	1	-	-	-	-	-	-	-	-	-	-	-	-	-	-	-	-	-	-	-	-	-	-	-	-	-	-	-	-	-	-	-	-	-	-	0.5426 (51/94)	-	-	-	-	-
4	138456694	C	CT	Camk2n1	ENSMUST00000050918.3	c.167-5dupT		splice_region_variant&intron_variant	2	-	-	-	-	-	-	-	-	-	-	-	-	-	-	-	-	-	-	-	-	-	-	-	-	-	-	-	-	-	-	-	-	-	-	-	-	-	-	-	-
4	139464625	G	T	Ubr4	ENSMUST00000097822.9	c.12578G>T	p.Trp4193Leu	missense_variant	2	-	-	-	-	-	-	-	-	-	-	-	-	-	-	-	-	-	-	-	-	-	-	-	-	-	-	-	-	-	-	-	-	-	-	-	-	-	-	-	-
4	140741561	G	A	Padi6	ENSMUST00000038749.10	c.270+197C>T		intron_variant	1	-	-	-	-	-	-	-	-	-	-	-	-	-	-	-	-	-	-	-	-	-	-	-	-	-	-	-	-	-	-	-	-	-	-	-	-	-	-	-	-
4	140765615	G	A	Padi4	ENSMUST00000026381.6	c.296C>T	p.Pro99Leu	missense_variant	1	-	-	-	-	-	-	-	-	-	-	-	-	-	-	-	-	-	-	-	-	-	-	-	-	-	-	-	-	-	-	-	-	-	-	-	-	-	-	-	-
4	140769426	A	G	Padi4	ENSMUST00000026381.6	c.158T>C	p.Ile53Thr	missense_variant	1	-	-	-	-	-	-	-	-	-	-	-	-	-	-	-	-	-	-	-	-	-	-	-	-	-	-	-	-	-	-	-	-	-	-	-	-	-	-	-	-
4	140769463	C	T	Padi4	ENSMUST00000026381.6	c.121G>A	p.Gly41Ser	missense_variant	1	-	-	-	-	-	-	-	-	-	-	-	-	-	-	-	-	-	-	-	-	-	-	-	-	-	-	-	-	-	-	-	-	-	-	-	-	-	-	-	-
4	140774112	T	G	Padi4	ENSMUST00000026381.6	c.69A>C	p.Thr23Thr	synonymous_variant	1	-	-	-	-	-	-	-	-	-	-	-	-	-	-	-	-	-	-	-	-	-	-	-	-	-	-	-	-	-	-	-	-	-	-	-	-	-	-	-	-
4	140934604	T	TC	Padi2	ENSMUST00000030765.6	c.1075-3dupC		splice_acceptor_variant&intron_variant	1	-	-	-	-	-	-	-	-	-	-	-	-	-	-	-	-	-	-	-	-	-	-	-	-	-	-	-	-	-	-	-	-	-	-	-	-	-	-	-	-
4	141035177	G	C	Crocc	ENSMUST00000102491.9	c.2493C>G	p.Ser831Arg	missense_variant	1	-	-	-	-	-	-	-	0.6154 (8/13)	-	-	-	-	-	-	-	-	-	-	-	-	-	-	-	-	-	-	-	-	-	-	-	-	-	-	-	-	-	-	-	-
4	141070130	GT	G	Necap2	ENSMUST00000030760.14	c.592delA	p.Thr198fs	frameshift_variant	1	-	-	-	-	0.6404 (57/89)	-	-	-	-	-	-	-	-	-	-	-	-	-	-	-	-	-	-	-	-	-	-	-	-	-	-	-	-	-	-	-	-	-	-	-
4	143792977	C	A	Gm13023	ENSMUST00000085144.10	c.307C>A	p.Leu103Ile	missense_variant	1	-	-	-	-	-	-	-	-	-	-	-	-	-	-	-	-	-	-	-	-	-	-	-	-	-	-	-	-	-	-	-	-	-	-	-	0.3769 (75/199)	-	-	-	-
4	143966626	GA	G	Gm13101	ENSMUST00000105763.1	c.280delT	p.Ser94fs	frameshift_variant	1	-	-	-	-	-	-	-	-	-	-	-	-	-	-	-	-	-	-	-	-	-	-	-	-	-	-	-	-	-	-	-	-	-	-	-	-	-	-	-	-
4	144715424	G	T	Gm13178	ENSMUST00000036876.7	c.256C>A	p.Pro86Thr	missense_variant	1	-	-	-	-	-	-	-	-	-	-	-	-	-	-	-	-	-	-	-	-	0.2045 (18/88)	-	-	-	-	-	-	-	-	-	-	-	-	-	-	-	-	-	-	-
4	144972813	T	C	Vps13d	ENSMUST00000036579.13	c.*2324A>G		3_prime_UTR_variant	1	-	-	-	-	-	-	-	-	-	-	-	-	-	-	-	-	0.2 (5/25)	-	-	-	-	-	-	-	-	-	-	-	-	-	-	-	-	-	-	-	-	-	-	-
4	145020124	G	T	Vps13d	ENSMUST00000036579.13	c.12472+13C>A		intron_variant	1	-	-	-	-	-	-	-	-	-	-	-	-	-	-	-	-	-	-	-	-	-	-	-	-	-	-	-	-	-	-	-	-	-	-	-	-	-	-	-	-
4	147512469	T	A	Zfp982	ENSMUST00000063704.7	c.282T>A	p.Leu94Leu	synonymous_variant	1	-	-	-	-	-	-	-	-	-	-	-	-	-	-	-	-	-	-	-	-	-	-	-	-	-	-	-	-	-	-	-	-	-	-	-	-	-	-	-	-
4	148145465	G	A	Mad2l2	ENSMUST00000030860.8	c.*52G>A		3_prime_UTR_variant	3	-	-	-	-	-	-	-	-	-	-	-	-	-	-	-	-	-	-	-	0.1852 (10/54)	-	0.1569 (8/51)	-	-	-	-	-	-	-	-	-	-	-	-	-	-	-	-	-	-
4	148145532	T	C	Mad2l2	ENSMUST00000030860.8	c.*119T>C		3_prime_UTR_variant	1	-	-	-	-	-	-	-	-	-	-	-	-	-	-	-	-	-	-	-	-	-	-	-	-	-	-	-	-	-	-	-	-	-	-	-	-	-	-	-	-
4	148436587	G	A	Ubiad1	ENSMUST00000051633.2	c.579C>T	p.Gly193Gly	synonymous_variant	2	-	-	-	-	-	-	-	-	-	-	-	-	-	-	-	-	-	-	-	-	-	0.1176 (4/34)	-	-	-	-	-	-	-	-	-	-	-	-	-	-	-	-	-	-
4	148452427	C	T	Mtor	ENSMUST00000103221.9	c.157C>T	p.Arg53*	stop_gained	2	-	-	-	-	-	-	-	-	-	-	-	-	-	-	-	-	-	-	-	-	-	-	-	-	-	-	-	-	-	-	-	-	-	-	-	-	-	-	-	-
4	148456015	G	T	Mtor	ENSMUST00000103221.9	c.736G>T	p.Asp246Tyr	missense_variant	2	-	-	-	-	-	-	-	-	-	-	-	-	-	-	-	-	-	-	-	-	-	-	-	-	-	-	-	-	-	-	-	-	-	-	-	-	-	-	-	-
4	148468351	C	T	Mtor	ENSMUST00000103221.9	c.2310C>T	p.Pro770Pro	synonymous_variant	1	-	-	-	-	-	-	-	-	-	-	-	-	-	-	-	-	-	-	-	0.2667 (4/15)	-	-	-	-	-	-	-	-	-	-	-	-	-	-	-	-	-	-	-	-
4	148568608	G	T	Exosc10	ENSMUST00000017408.13	c.1587-43G>T		intron_variant	1	-	-	-	-	-	-	-	-	-	-	-	-	-	-	-	-	-	-	-	-	-	-	0.2261 (26/115)	-	-	-	-	-	-	-	-	-	-	-	-	-	-	-	-	-
4	148602757	C	T	Masp2	ENSMUST00000052060.6	c.95C>T	p.Ser32Phe	missense_variant	1	-	-	-	-	-	-	-	-	-	-	-	-	-	0.6441 (38/59)	-	-	-	-	-	-	-	-	-	-	-	-	-	-	-	-	-	-	-	-	-	-	-	-	-	-
4	148602878	C	T	Masp2	ENSMUST00000052060.6	c.216C>T	p.Cys72Cys	synonymous_variant	1	-	-	-	-	-	-	-	-	-	-	-	-	-	-	-	-	-	-	-	-	-	-	-	-	-	-	-	-	-	-	-	-	-	-	-	-	-	-	-	-
4	148612712	G	T	Masp2	ENSMUST00000052060.6	c.1281G>T	p.Pro427Pro	synonymous_variant	1	-	-	-	-	-	-	-	-	-	-	-	-	-	-	-	-	-	-	-	0.1579 (9/57)	-	-	-	-	-	-	-	-	-	-	-	-	-	-	-	-	-	-	-	-
4	148612712	G	T	Tardbp	ENSMUST00000084125.9	c.*5549C>A		3_prime_UTR_variant	1	-	-	-	-	-	-	-	-	-	-	-	-	-	-	-	-	-	-	-	0.1579 (9/57)	-	-	-	-	-	-	-	-	-	-	-	-	-	-	-	-	-	-	-	-
4	149106264	G	A	Dffa	ENSMUST00000030816.3	c.249G>A	p.Thr83Thr	synonymous_variant	1	-	-	-	-	-	-	-	-	-	-	-	-	-	-	-	-	-	-	-	0.2083 (5/24)	-	-	-	-	-	-	-	-	-	-	-	-	-	-	-	-	-	-	-	-
4	149107848	T	C	Dffa	ENSMUST00000030816.3	c.378T>C	p.Asn126Asn	synonymous_variant	2	-	-	-	-	-	-	-	-	-	-	-	-	-	-	-	-	-	-	-	0.2581 (8/31)	-	-	-	-	-	-	-	-	-	-	-	-	-	-	-	-	-	-	-	-
4	149166625	G	A	Pgd	ENSMUST00000084124.6	c.-31C>T		5_prime_UTR_variant	2	-	-	-	-	-	-	-	-	-	-	-	-	-	-	-	-	-	-	-	0.1304 (18/138)	-	-	-	-	-	-	-	-	-	-	-	-	-	-	-	-	-	-	-	-
4	149166633	G	A	Pgd	ENSMUST00000084124.6	c.-39C>T		5_prime_UTR_variant	1	-	-	-	-	-	-	-	-	-	-	-	-	-	-	-	-	-	-	-	-	-	-	-	-	-	-	-	-	-	-	-	-	-	-	-	-	-	-	-	-
4	149204172	A	T	Kif1b	ENSMUST00000060537.12	c.3797+14T>A		intron_variant	1	-	-	-	-	-	-	-	-	-	-	-	-	-	-	-	-	-	-	-	-	-	-	-	-	-	-	-	-	-	-	-	-	-	-	-	-	-	-	-	-
4	149348036	G	A	Ube4b	ENSMUST00000103212.9	c.2430C>T	p.Phe810Phe	synonymous_variant	1	-	-	-	-	-	-	-	-	-	-	-	-	-	-	-	-	-	-	-	0.1125 (9/80)	-	-	-	-	-	-	-	-	-	-	-	-	-	-	-	-	-	-	-	-
4	149348036	G	A	Ube4bos1	ENSMUST00000141259.1	n.123G>A		non_coding_transcript_exon_variant	1	-	-	-	-	-	-	-	-	-	-	-	-	-	-	-	-	-	-	-	0.1125 (9/80)	-	-	-	-	-	-	-	-	-	-	-	-	-	-	-	-	-	-	-	-
4	149425967	G	A	Ube4b	ENSMUST00000103212.9	c.-62C>T		5_prime_UTR_variant	1	-	-	-	-	-	-	-	-	-	-	-	-	-	-	-	-	-	-	-	0.1404 (8/57)	-	-	-	-	-	-	-	-	-	-	-	-	-	-	-	-	-	-	-	-
4	149627282	G	A	Clstn1	ENSMUST00000039144.6	c.315G>A	p.Thr105Thr	synonymous_variant	1	-	-	-	0.2154 (70/325)	-	-	-	-	-	-	-	-	-	-	-	-	-	-	-	-	-	-	-	-	-	-	-	-	-	-	-	-	-	-	-	-	-	-	-	-
4	149898182	G	A	Spsb1	ENSMUST00000038562.8	c.*32C>T		3_prime_UTR_variant	2	-	-	-	-	-	-	-	-	-	-	-	-	-	-	-	-	-	-	-	0.1481 (8/54)	-	-	-	-	-	-	-	-	-	-	-	-	-	-	-	-	-	-	-	-
4	149898283	C	T	Spsb1	ENSMUST00000038562.8	c.753G>A	p.Lys251Lys	synonymous_variant	1	-	-	-	-	-	-	-	-	-	-	-	-	-	-	-	-	-	-	-	-	-	-	-	-	-	-	-	-	-	-	-	-	-	-	-	-	-	-	-	-
4	150165188	A	C	Slc2a7	ENSMUST00000059893.7	c.1231+4A>C		splice_region_variant&intron_variant	1	-	-	-	-	-	-	-	-	-	-	-	-	-	-	-	-	-	-	-	-	-	-	-	-	-	-	-	-	-	-	-	-	-	-	-	-	-	-	-	-
4	151145118	T	G	Camta1	ENSMUST00000049790.13	c.1256A>C	p.Asn419Thr	missense_variant	1	-	-	-	-	-	-	-	-	-	-	-	-	-	-	-	-	-	-	-	-	-	-	-	-	-	-	-	-	-	-	-	-	-	-	-	-	-	-	-	-
4	152020800	C	A	Zbtb48	ENSMUST00000066715.10	c.1474G>T	p.Gly492Trp	missense_variant	1	-	-	-	-	-	-	-	-	-	-	-	-	-	-	-	-	-	-	-	-	-	-	-	-	-	-	-	-	-	-	-	-	-	-	-	-	-	-	-	-
4	152057845	T	G	Nol9	ENSMUST00000084116.12	c.1931T>G	p.Leu644Arg	missense_variant	2	-	-	-	-	-	-	-	-	-	-	-	-	-	-	-	-	-	-	-	-	-	-	-	-	-	-	-	-	-	-	-	-	-	-	-	-	-	-	-	-
4	152057909	T	A	Nol9	ENSMUST00000084116.12	c.1995T>A	p.Cys665*	stop_gained	2	-	-	-	-	-	-	-	-	-	-	-	-	-	-	-	-	-	-	-	-	-	-	-	-	-	-	-	-	-	-	-	-	-	-	-	-	-	-	-	-
4	152057914	T	A	Nol9	ENSMUST00000084116.12	c.2000T>A	p.Phe667Tyr	missense_variant	2	-	-	-	-	-	-	-	-	-	-	-	-	-	-	-	-	-	-	-	-	-	-	-	-	-	-	-	-	-	-	-	-	-	-	-	-	-	-	-	-
4	152282933	C	G	Gpr153	ENSMUST00000055754.7	c.1240C>G	p.Pro414Ala	missense_variant	2	-	-	-	-	-	-	-	-	-	-	-	-	-	-	-	-	-	-	-	-	-	-	-	-	-	-	-	-	-	-	-	-	-	-	-	-	-	-	-	-
4	156218896	G	GT	Perm1	ENSMUST00000105572.2	c.1905dupT	p.Arg636fs	frameshift_variant	2	-	-	-	-	-	-	-	-	-	-	-	-	-	-	-	-	-	-	-	-	-	-	-	-	-	-	-	-	-	-	-	-	0.1111 (4/36)	-	-	-	0.2222 (4/18)	-	-	-
5	3344393	C	T	Cdk6	ENSMUST00000042410.4	c.27C>T	p.Ala9Ala	synonymous_variant	1	-	-	-	0.8305 (49/59)	-	-	-	-	-	-	-	-	-	-	-	-	-	-	-	-	-	-	-	-	-	-	-	-	-	-	-	-	-	-	-	-	-	-	-	-
5	3344471	C	A	Cdk6	ENSMUST00000042410.4	c.105C>A	p.Asn35Lys	missense_variant	2	-	-	-	0.5625 (18/32)	-	-	-	-	-	-	-	-	-	-	-	-	-	-	-	-	-	-	-	-	0.25 (4/16)	-	-	-	-	-	-	-	-	-	-	-	-	-	-	-
5	3701809	G	A	Ankib1	ENSMUST00000043551.10	c.2230C>T	p.Arg744Cys	missense_variant	2	-	-	-	-	-	-	-	-	-	-	-	-	-	0.4681 (22/47)	-	-	-	-	-	-	-	-	-	-	-	-	-	-	-	-	-	-	-	-	-	-	-	-	-	-
5	5010843	C	T	Cdk14	ENSMUST00000030763.12	c.1031G>A	p.Arg344Gln	missense_variant	1	-	-	-	-	-	-	-	-	-	-	0.3158 (6/19)	-	-	-	-	-	-	-	-	-	-	-	-	-	-	-	-	-	-	-	-	-	-	-	-	-	-	-	-	-
5	5265911	C	T	Cdk14	ENSMUST00000030763.12	c.124-16683G>A		intron_variant	1	-	-	-	-	-	-	-	-	-	-	-	-	-	-	-	-	-	-	-	-	-	-	-	-	-	-	-	-	-	-	-	-	-	-	-	-	-	-	-	-
5	21560936	C	G	Lrrc17	ENSMUST00000035651.5	c.415C>G	p.Gln139Glu	missense_variant	1	-	-	-	-	-	0.1471 (15/102)	-	-	-	-	-	-	-	-	-	-	-	-	-	-	-	-	-	-	-	-	-	-	-	-	-	-	-	-	-	-	-	-	-	-
5	21560936	C	G	Fbxl13	ENSMUST00000051358.10	c.977-4077G>C		intron_variant	1	-	-	-	-	-	0.1471 (15/102)	-	-	-	-	-	-	-	-	-	-	-	-	-	-	-	-	-	-	-	-	-	-	-	-	-	-	-	-	-	-	-	-	-	-
5	21932765	G	C	Reln	ENSMUST00000161356.7	c.7428C>G	p.Val2476Val	synonymous_variant	1	-	-	-	-	-	-	-	-	-	-	-	-	-	-	-	-	-	-	-	-	-	-	-	-	-	-	-	-	-	-	-	-	-	-	-	-	-	-	-	-
5	21932765	G	C	Gm10475	ENSMUST00000084713.4	n.191-17877G>C		intron_variant	1	-	-	-	-	-	-	-	-	-	-	-	-	-	-	-	-	-	-	-	-	-	-	-	-	-	-	-	-	-	-	-	-	-	-	-	-	-	-	-	-
5	23524290	C	T	Srpk2	ENSMUST00000088392.8	c.1350G>A	p.Pro450Pro	synonymous_variant	2	-	-	-	-	-	-	-	-	-	-	-	-	-	-	-	-	-	-	-	-	-	-	-	-	-	-	-	-	-	-	-	-	-	-	-	-	-	0.2532 (20/79)	-	-
5	24377752	T	C	Nos3	ENSMUST00000030834.6	c.1934+43T>C		intron_variant	1	-	-	-	-	-	-	-	-	-	-	-	-	-	-	-	-	-	-	-	-	-	-	-	-	-	-	-	-	-	-	-	-	-	-	-	-	-	-	-	-
5	24377752	T	C	Gm15587	ENSMUST00000146326.7	n.103-5415A>G		intron_variant	1	-	-	-	-	-	-	-	-	-	-	-	-	-	-	-	-	-	-	-	-	-	-	-	-	-	-	-	-	-	-	-	-	-	-	-	-	-	-	-	-
5	24387031	G	GA	Atg9b	ENSMUST00000059401.6	c.1968dupT	p.His657fs	frameshift_variant	1	-	-	-	-	-	-	-	-	-	-	-	-	-	-	-	-	-	-	-	-	-	-	-	-	-	-	-	-	-	-	-	-	-	-	-	-	-	-	-	-
5	24416348	A	T	Asic3	ENSMUST00000196296.1	c.1007-33A>T		intron_variant	1	-	-	-	-	-	-	-	-	-	-	-	-	-	-	-	-	-	-	-	-	-	-	-	-	-	-	-	-	-	-	-	-	-	-	-	-	-	-	-	-
5	25273742	T	G	Kmt2c	ENSMUST00000045291.13	c.14639A>C	p.Lys4880Thr	missense_variant	1	-	-	-	-	-	-	-	-	-	-	-	-	-	-	-	-	-	-	-	-	-	-	-	-	-	-	-	-	-	-	-	-	-	-	0.1026 (4/39)	-	-	-	-	-
5	28074609	C	T	Insig1	ENSMUST00000059155.10	c.611C>T	p.Thr204Met	missense_variant	1	-	-	-	-	-	-	-	-	-	-	-	-	-	-	-	-	-	-	-	-	-	-	-	-	-	-	-	-	-	-	-	-	-	-	-	-	-	-	-	-
5	30367973	G	T	Otof	ENSMUST00000074171.9	c.*90C>A		3_prime_UTR_variant	1	-	-	-	-	-	-	-	-	-	-	-	-	-	-	-	-	-	-	-	-	-	-	-	-	-	-	-	-	-	-	-	-	-	-	-	-	-	0.2 (5/25)	-	-
5	30622111	C	T	Kcnk3	ENSMUST00000066295.3	c.504C>T	p.Ile168Ile	synonymous_variant	1	-	-	-	-	-	-	-	-	-	-	-	-	-	-	-	-	-	-	-	-	-	-	-	-	-	-	-	-	-	-	-	-	-	-	-	-	-	0.5778 (26/45)	-	-
5	30794002	G	GA	Dpysl5	ENSMUST00000088081.10	c.1515dupA	p.Glu506fs	frameshift_variant	1	-	-	-	-	-	-	-	-	-	-	-	-	-	-	-	-	-	-	-	-	-	-	-	-	-	-	-	-	-	-	-	-	-	-	-	-	-	-	-	-
5	30871803	C	CT	Tmem214	ENSMUST00000201203.3	c.591dupT	p.Asp198fs	frameshift_variant&stop_gained	9	-	-	-	-	-	-	-	-	-	0.1183 (11/93)	-	-	-	-	-	-	-	-	-	-	-	-	-	-	-	-	-	-	-	-	0.1193 (13/109)	-	-	-	-	-	-	-	-	-
5	31510915	C	CT	Gpn1	ENSMUST00000076949.12	c.*5dupT		3_prime_UTR_variant	2	-	-	-	-	-	-	-	-	-	-	-	-	-	-	-	-	-	-	-	-	-	-	-	-	-	-	-	-	-	-	-	-	-	-	-	-	-	-	-	-
5	33879176	A	T	Whsc1	ENSMUST00000066854.13	c.2003A>T	p.Glu668Val	missense_variant	1	-	-	-	-	-	-	-	-	-	0.1321 (7/53)	-	-	-	-	-	-	-	-	-	-	-	-	-	-	-	-	-	-	-	-	-	-	-	-	-	-	-	-	-	-
5	34349547	C	G	Rnf4	ENSMUST00000030992.12	c.217-3C>G		splice_region_variant&intron_variant	1	-	-	-	-	-	-	-	-	-	-	-	-	-	-	-	0.3333 (5/15)	-	-	-	-	-	-	-	-	-	-	-	-	-	-	-	-	-	-	-	-	-	-	-	-
5	34610219	T	G	Add1	ENSMUST00000114340.8	c.538T>G	p.Phe180Val	missense_variant	1	-	-	-	-	-	-	-	-	-	0.5602 (93/166)	-	-	-	-	-	-	-	-	-	-	-	-	-	-	-	-	-	-	-	-	-	-	-	-	-	-	-	-	-	-
5	34635160	C	CA	Mfsd10	ENSMUST00000001109.10	c.697-2_697-1insT		splice_acceptor_variant&intron_variant	1	-	-	-	-	-	-	-	-	-	-	-	-	-	-	-	-	-	-	-	-	-	-	-	0.2391 (11/46)	-	-	-	-	-	-	-	-	-	-	-	-	-	-	-	-
5	35048155	A	AG	Hgfac	ENSMUST00000030985.9	c.1783dupG	p.Asp595fs	frameshift_variant	1	-	-	-	-	-	0.3721 (16/43)	-	-	-	-	-	-	-	-	-	-	-	-	-	-	-	-	-	-	-	-	-	-	-	-	-	-	-	-	-	-	-	-	-	-
5	35668177	G	T	Htra3	ENSMUST00000087629.9	c.726+6C>A		splice_region_variant&intron_variant	1	-	-	-	-	-	-	-	-	-	-	-	-	-	-	-	-	-	-	-	-	-	-	-	-	-	-	-	-	-	-	-	-	-	-	-	-	-	-	-	-
5	35948185	G	A	Afap1	ENSMUST00000064571.10	c.482G>A	p.Arg161His	missense_variant	1	-	-	-	-	-	-	-	-	-	-	-	-	-	-	-	-	-	-	-	-	-	-	-	-	-	-	-	-	-	-	-	-	-	-	-	-	-	-	-	-
5	36471437	T	G	Grpel1	ENSMUST00000031099.3	c.*35T>G		3_prime_UTR_variant	1	-	-	-	-	-	-	-	-	-	0.3106 (50/161)	-	-	-	-	-	-	-	-	-	-	-	-	-	-	-	-	-	-	-	-	-	-	-	-	-	-	-	-	-	-
5	36815442	T	C	Man2b2	ENSMUST00000031002.9	c.1727A>G	p.Lys576Arg	missense_variant	1	-	-	-	-	-	-	-	-	-	-	-	-	-	-	-	-	-	-	-	-	-	-	-	-	-	-	-	-	-	-	-	-	-	-	-	-	-	-	-	-
5	37100625	C	A	Jakmip1	ENSMUST00000121010.8	c.625-11C>A		intron_variant	1	-	-	-	-	-	-	-	-	-	-	-	-	-	-	-	-	-	-	-	-	-	-	-	-	-	-	-	-	-	-	-	-	-	-	-	-	-	-	-	-
5	38671673	G	A	Zfp518b	ENSMUST00000057258.10	c.2988C>T	p.Tyr996Tyr	synonymous_variant	2	-	-	-	-	-	-	-	-	-	-	-	-	-	-	-	-	-	-	-	-	-	-	-	-	-	-	-	-	-	-	-	-	-	-	-	-	-	-	-	-
5	39614513	C	T	Hs3st1	ENSMUST00000053116.6	c.786G>A	p.Arg262Arg	synonymous_variant	1	0.2899 (20/69)	-	-	-	-	-	-	-	-	-	-	-	-	-	-	-	-	-	-	-	-	-	-	-	-	-	-	-	-	-	-	-	-	-	-	-	-	-	-	-
5	43995107	G	T	Prom1	ENSMUST00000074113.12	c.2596C>A	p.Arg866Arg	synonymous_variant	1	-	-	-	-	-	-	-	-	-	-	-	-	-	-	-	-	-	-	-	-	-	-	-	-	-	-	-	-	-	-	-	-	-	-	-	-	-	-	-	-
5	52864548	G	T	Anapc4	ENSMUST00000031072.13	c.1971G>T	p.Met657Ile	missense_variant	2	-	-	-	-	-	-	-	-	-	-	-	-	-	-	-	-	-	-	-	-	-	-	-	-	-	-	-	-	-	-	-	-	-	-	-	-	-	-	-	-
5	65091515	A	T	Tmem156	ENSMUST00000212080.1	c.57+51T>A		intron_variant	1	-	-	-	-	-	-	-	-	-	-	-	-	-	-	-	-	-	-	-	-	-	-	-	-	-	-	-	-	-	-	-	-	-	-	-	-	-	-	-	-
5	65594850	A	G	Ube2k	ENSMUST00000142407.7	c.529-25A>G		intron_variant	1	-	-	-	-	1.0 (12/12)	-	-	-	-	-	-	-	-	-	-	-	-	-	-	-	-	-	-	-	-	-	-	-	-	-	-	-	-	-	-	-	-	-	-	-
5	66026149	G	GT	Rbm47	ENSMUST00000094757.8	c.1109dupA	p.Asn370fs	frameshift_variant	1	-	-	-	-	-	-	-	-	-	-	-	-	-	-	-	-	-	-	-	-	-	-	-	-	-	-	-	-	-	-	-	-	-	-	-	-	0.1379 (4/29)	-	-	-
5	66027247	T	G	Rbm47	ENSMUST00000094757.8	c.12A>C	p.Glu4Asp	missense_variant	1	-	-	-	-	-	-	-	-	-	-	-	-	-	-	-	-	-	-	-	-	-	-	-	-	-	-	-	-	-	-	-	-	-	-	-	-	-	-	-	-
5	66312234	G	A	Apbb2	ENSMUST00000087256.11	c.1660C>T	p.Arg554Trp	missense_variant	2	-	-	-	-	-	-	-	-	-	-	-	-	-	-	-	-	-	-	-	-	-	-	-	-	-	-	-	-	-	-	-	-	-	-	-	-	-	-	-	-
5	67030820	C	T	Limch1	ENSMUST00000118242.7	c.2599-6C>T		splice_region_variant&intron_variant	1	-	-	-	-	-	-	-	-	-	-	-	-	-	-	-	-	-	-	-	-	-	-	-	-	-	-	-	-	-	-	-	-	-	-	-	-	-	-	-	-
5	67286968	C	T	Tmem33	ENSMUST00000037918.11	c.*743C>T		3_prime_UTR_variant	1	-	-	-	-	-	-	-	-	-	-	-	-	-	-	-	-	-	-	-	-	-	-	-	-	-	-	-	-	-	-	-	-	-	-	-	-	-	-	-	-
5	67286971	A	G	Tmem33	ENSMUST00000037918.11	c.*746A>G		3_prime_UTR_variant	2	-	-	-	-	-	-	-	-	-	-	-	-	-	-	-	-	-	-	-	-	-	-	-	-	-	0.1538 (4/26)	-	-	-	-	-	-	-	-	-	-	-	-	-	-
5	72246854	C	CT	Atp10d	ENSMUST00000126664.7	c.1218dupT	p.Asn407fs	frameshift_variant&stop_gained	2	-	-	-	-	-	-	-	-	-	-	-	-	-	-	-	-	-	-	-	-	-	-	-	-	-	-	-	-	-	-	-	-	-	-	-	-	-	-	-	-
5	72556199	T	C	Nfxl1	ENSMUST00000087216.11	c.400A>G	p.Thr134Ala	missense_variant	1	-	-	-	-	-	-	-	-	-	0.2593 (7/27)	-	-	-	-	-	-	-	-	-	-	-	-	-	-	-	-	-	-	-	-	-	-	-	-	-	-	-	-	-	-
5	72604902	T	G	Cnga1	ENSMUST00000087213.11	c.1268A>C	p.Glu423Ala	missense_variant	1	-	-	-	-	-	-	-	-	0.422 (46/109)	-	-	-	-	-	-	-	-	-	-	-	-	-	-	-	-	-	-	-	-	-	-	-	-	-	-	-	-	-	-	-
5	72941323	C	G	Slain2	ENSMUST00000143829.4	c.421C>G	p.Pro141Ala	missense_variant	1	-	-	-	-	-	-	-	-	-	-	-	-	-	-	-	-	-	-	-	-	-	-	-	-	0.45 (18/40)	-	-	-	-	-	-	-	-	-	-	-	-	-	-	-
5	73021943	C	T	Fryl	ENSMUST00000094700.10	c.*96G>A		3_prime_UTR_variant	1	-	-	-	-	-	-	-	-	-	-	-	-	-	-	-	-	-	-	-	-	-	-	-	-	-	-	-	-	-	-	-	-	-	-	-	-	-	-	-	-
5	73424020	A	C	Cwh43	ENSMUST00000031040.12	c.1266+26A>C		intron_variant	1	-	-	-	-	-	-	-	-	-	-	-	-	-	-	-	-	-	-	-	-	-	-	-	-	-	-	-	-	-	-	-	-	-	-	-	-	-	-	-	-
5	74620245	T	C	Lnx1	ENSMUST00000087161.9	c.1091A>G	p.Lys364Arg	missense_variant	1	-	-	-	-	-	-	-	-	-	-	-	-	-	-	-	-	-	-	-	-	-	-	-	-	-	-	-	-	-	-	-	-	-	-	-	-	-	-	-	-
5	76638107	T	TA	Cep135	ENSMUST00000049060.7	c.3063dupA	p.Gln1022fs	frameshift_variant	1	-	-	-	-	-	-	-	-	-	-	-	-	-	-	-	-	-	-	-	-	-	-	-	-	-	-	-	-	-	-	-	-	-	-	-	-	-	-	-	-
5	81646470	C	G	Adgrl3	ENSMUST00000120673.7	c.1541C>G	p.Thr514Ser	missense_variant	2	-	-	-	-	-	-	-	-	-	-	-	-	-	-	-	-	-	-	-	-	-	-	-	-	-	-	-	-	-	-	-	-	-	-	-	-	-	-	-	-
5	86713871	G	A	Tmprss11e	ENSMUST00000161306.1	c.815C>T	p.Pro272Leu	missense_variant	1	-	-	-	-	-	-	-	-	-	-	-	-	-	-	-	-	-	-	-	-	-	-	-	-	-	-	-	-	-	-	-	-	-	-	-	-	-	-	-	-
5	86831924	T	C	Ythdc1	ENSMUST00000038384.7	c.1789-24T>C		intron_variant	1	-	-	-	-	-	-	-	-	-	-	-	-	-	-	-	-	-	-	-	-	-	-	-	-	-	-	-	-	-	-	-	-	-	-	-	-	-	-	-	-
5	86831925	G	A	Ythdc1	ENSMUST00000038384.7	c.1789-23G>A		intron_variant	1	-	-	-	-	-	-	-	-	-	-	-	-	-	-	-	-	-	-	-	-	-	-	-	-	-	-	-	-	-	-	-	-	-	-	-	-	-	-	-	-
5	87670892	A	C	Csn1s1	ENSMUST00000094641.8	c.151-3A>C		splice_region_variant&intron_variant	1	-	-	-	-	-	-	-	-	-	-	-	-	-	-	-	-	-	-	-	-	-	-	-	-	-	-	-	-	-	-	-	-	-	-	-	-	-	-	-	-
5	87674052	T	G	Csn1s1	ENSMUST00000094641.8	c.292-3T>G		splice_region_variant&intron_variant	1	-	-	-	-	-	-	-	-	-	-	-	-	-	-	-	-	-	-	-	-	-	-	-	-	-	-	-	-	-	-	-	-	-	-	-	-	-	-	-	-
5	87674212	A	T	Csn1s1	ENSMUST00000094641.8	c.340A>T	p.Asn114Tyr	missense_variant	2	-	-	-	-	-	-	-	-	-	-	-	-	-	-	-	-	-	-	-	-	-	-	-	-	-	-	-	-	-	-	-	-	-	-	-	-	-	-	-	-
5	87885844	C	CT	Odam	ENSMUST00000113274.2	c.52-3dupT		splice_acceptor_variant&intron_variant	1	-	-	-	-	-	-	-	-	-	-	-	-	-	-	-	-	-	-	-	-	-	-	-	-	-	-	-	-	-	-	-	-	-	-	-	-	-	-	-	-
5	90222322	A	C	Cox18	ENSMUST00000118816.5	c.334T>G	p.Leu112Val	missense_variant	1	-	-	-	-	-	-	-	-	-	-	-	-	-	-	-	-	-	-	-	-	-	-	-	-	-	-	-	-	-	-	-	-	-	-	-	-	-	-	-	-
5	91737844	G	A	Trmt112-ps1	ENSMUST00000202320.1	n.236C>T		non_coding_transcript_exon_variant	1	-	-	-	-	-	-	-	-	-	-	-	-	-	-	-	-	-	-	-	-	-	-	-	-	-	-	-	-	-	-	-	-	-	-	-	-	-	-	-	-
5	92037308	G	GT	Cdkl2	ENSMUST00000086978.11	c.222dupA	p.Arg75fs	frameshift_variant	1	-	-	-	-	-	-	-	-	-	-	-	-	-	-	-	-	-	-	-	-	-	-	-	-	-	-	-	-	-	-	-	-	-	-	-	-	-	-	-	-
5	92187748	A	C	Uso1	ENSMUST00000031355.9	c.1614A>C	p.Gln538His	missense_variant	1	-	-	-	-	-	-	-	-	-	0.305 (79/259)	-	-	-	-	-	-	-	-	-	-	-	-	-	-	-	-	-	-	-	-	-	-	-	-	-	-	-	-	-	-
5	92662745	GA	G	Ccdc158	ENSMUST00000060930.9	c.286-4delT		splice_region_variant&intron_variant	1	-	-	-	-	-	-	-	-	-	-	-	-	-	-	-	-	-	-	-	-	-	-	-	-	-	-	-	-	-	-	-	-	-	-	-	-	-	-	-	-
5	92951075	G	A	Shroom3	ENSMUST00000113055.8	c.4413G>A	p.Ser1471Ser	synonymous_variant	1	-	-	-	-	-	-	-	-	-	-	-	-	-	-	-	-	-	-	-	-	-	-	-	-	-	0.6235 (53/85)	-	-	-	-	-	-	-	-	-	-	-	-	-	-
5	93391101	T	G	Kat2b-ps	ENSMUST00000128468.1	n.1991A>C		non_coding_transcript_exon_variant	1	-	-	-	-	-	-	-	-	-	-	-	-	-	-	-	-	-	-	-	-	-	-	-	-	-	-	-	-	-	-	-	-	-	-	-	-	-	-	-	-
5	96077122	A	G	Cnot6l	ENSMUST00000113005.8	c.*58T>C		3_prime_UTR_variant	4	-	-	-	-	-	-	-	-	-	-	-	-	-	-	-	-	-	-	-	-	-	-	-	-	-	-	-	-	-	-	-	-	-	-	-	-	-	-	-	-
5	98931486	T	C	Prkg2	ENSMUST00000161490.7	c.*524A>G		3_prime_UTR_variant	1	-	-	-	-	-	-	-	-	-	-	-	-	-	-	-	-	-	-	-	-	-	-	-	-	-	-	-	-	-	0.1143 (4/35)	-	-	-	-	-	-	-	-	-	-
5	98994615	T	C	Prkg2	ENSMUST00000161490.7	c.659A>G	p.Lys220Arg	missense_variant	1	-	-	-	-	-	-	-	-	-	-	-	-	-	-	-	-	-	-	-	-	-	-	-	-	-	-	-	-	-	-	-	-	-	-	-	-	-	-	-	-
5	103833835	A	C	Aff1	ENSMUST00000031256.5	c.1863A>C	p.Glu621Asp	missense_variant	1	-	-	-	-	-	-	-	-	-	-	-	-	-	-	-	-	-	-	-	-	-	-	-	-	-	-	-	-	-	-	-	-	-	-	-	-	-	-	-	-
5	104088392	C	T	Sparcl1	ENSMUST00000031249.7	c.1489+5G>A		splice_region_variant&intron_variant	2	-	-	-	-	-	-	-	-	0.2982 (17/57)	-	-	-	-	-	-	-	-	-	-	-	-	-	-	-	-	-	-	-	-	-	0.85 (17/20)	-	-	-	-	-	-	-	-	-
5	104494973	C	T	Pkd2	ENSMUST00000086831.3	c.2094C>T	p.Leu698Leu	synonymous_variant	1	-	-	-	-	-	-	-	-	-	-	-	-	-	-	-	-	-	-	-	-	-	-	-	-	-	-	-	-	-	-	-	-	-	-	-	-	-	-	-	-
5	104518580	G	GA	BC005561	ENSMUST00000096452.5	c.973dupA	p.Ser325fs	frameshift_variant	1	-	-	-	-	0.3333 (5/15)	-	-	-	-	-	-	-	-	-	-	-	-	-	-	-	-	-	-	-	-	-	-	-	-	-	-	-	-	-	-	-	-	-	-	-
5	104519826	T	G	BC005561	ENSMUST00000096452.5	c.2213T>G	p.Leu738Arg	missense_variant	1	-	-	-	-	-	-	-	-	0.4167 (70/168)	-	-	-	-	-	-	-	-	-	-	-	-	-	-	-	-	-	-	-	-	-	-	-	-	-	-	-	-	-	-	-
5	105018538	T	C	Gbp8	ENSMUST00000031235.12	c.900+24A>G		intron_variant	1	-	-	-	-	-	-	-	-	-	-	-	-	-	-	-	-	-	-	-	-	-	-	-	-	-	-	-	-	-	-	-	-	-	-	-	-	-	-	-	-
5	105125313	A	T	Gbp4	ENSMUST00000100962.7	c.465T>A	p.Thr155Thr	synonymous_variant	1	-	-	-	-	-	-	-	-	-	-	-	-	-	-	-	-	-	-	-	-	-	-	-	-	-	-	-	-	-	-	-	-	-	-	0.119 (5/42)	-	-	-	-	-
5	105125313	A	T	Gbp8	ENSMUST00000031235.12	c.-25+14167T>A		intron_variant	1	-	-	-	-	-	-	-	-	-	-	-	-	-	-	-	-	-	-	-	-	-	-	-	-	-	-	-	-	-	-	-	-	-	-	0.119 (5/42)	-	-	-	-	-
5	105125313	A	T	Gbp9	ENSMUSG00000029298	n.105125313T>A		intragenic_variant	1	-	-	-	-	-	-	-	-	-	-	-	-	-	-	-	-	-	-	-	-	-	-	-	-	-	-	-	-	-	-	-	-	-	-	0.119 (5/42)	-	-	-	-	-
5	105233929	G	C	Gm43302	ENSMUST00000050011.9	c.1651-16439C>G		intron_variant	1	-	-	-	-	-	-	-	-	-	-	-	-	-	-	-	-	-	-	-	-	-	-	-	-	-	-	-	-	-	-	-	-	-	-	-	-	-	-	-	-
5	105233929	G	C	Gbp10	ENSMUST00000065588.6	c.312+42C>G		intron_variant	1	-	-	-	-	-	-	-	-	-	-	-	-	-	-	-	-	-	-	-	-	-	-	-	-	-	-	-	-	-	-	-	-	-	-	-	-	-	-	-	-
5	105274808	T	C	Gm43302	ENSMUST00000050011.9	c.1357A>G	p.Ser453Gly	missense_variant	2	-	-	-	-	-	-	-	-	-	-	-	-	-	-	-	-	-	-	-	-	-	-	-	-	-	-	-	-	-	-	-	-	-	-	-	-	-	-	-	-
5	105274808	T	C	Gbp6	ENSMUST00000196520.1	c.1357A>G	p.Ser453Gly	missense_variant	2	-	-	-	-	-	-	-	-	-	-	-	-	-	-	-	-	-	-	-	-	-	-	-	-	-	-	-	-	-	-	-	-	-	-	-	-	-	-	-	-
5	105323846	G	C	Gbp11	ENSMUST00000100960.10	c.1805C>G	p.Ser602Cys	missense_variant	1	-	-	-	-	-	-	-	-	-	-	-	-	-	0.2195 (18/82)	-	-	-	-	-	-	-	-	-	-	-	-	-	-	-	-	-	-	-	-	-	-	-	-	-	-
5	106634851	A	AT	Zfp644	ENSMUST00000112696.7	c.3655dupA	p.Met1219fs	frameshift_variant	1	-	-	-	-	-	-	-	-	-	-	-	-	-	-	-	-	-	-	-	-	-	-	-	-	-	-	-	-	-	-	-	-	-	-	-	-	-	-	-	-
5	106634851	A	AT	Gm28039	ENSMUST00000149128.2	n.41-15210dupA		intron_variant	1	-	-	-	-	-	-	-	-	-	-	-	-	-	-	-	-	-	-	-	-	-	-	-	-	-	-	-	-	-	-	-	-	-	-	-	-	-	-	-	-
5	107406082	G	A	Ephx4	ENSMUST00000049146.11	c.276G>A	p.Pro92Pro	synonymous_variant	1	-	-	-	-	-	-	-	-	-	-	-	-	-	-	-	-	-	-	-	-	-	-	-	-	-	-	-	-	-	-	-	-	-	-	-	-	-	-	-	-
5	107406082	G	A	Gm17202	ENSMUST00000171723.1	n.161-469C>T		intron_variant	1	-	-	-	-	-	-	-	-	-	-	-	-	-	-	-	-	-	-	-	-	-	-	-	-	-	-	-	-	-	-	-	-	-	-	-	-	-	-	-	-
5	108126014	T	G	Tmed5	ENSMUST00000002837.10	c.358A>C	p.Ile120Leu	missense_variant	1	-	-	-	-	-	-	-	-	-	-	-	-	-	-	-	-	-	-	-	-	-	-	-	-	-	-	-	-	-	-	-	-	-	-	0.1366 (22/161)	-	-	-	-	-
5	108126047	C	G	Tmed5	ENSMUST00000002837.10	c.325G>C	p.Asp109His	missense_variant	1	-	-	-	-	-	-	-	-	-	-	-	-	-	-	-	-	-	-	-	-	-	-	-	-	-	-	-	-	-	-	-	-	-	-	-	-	-	-	-	-
5	108193812	C	CA	Ccdc18	ENSMUST00000047677.8	c.2578dupA	p.Ile860fs	frameshift_variant	1	-	-	-	-	-	-	-	-	-	-	-	-	-	-	-	-	-	-	-	-	-	-	-	-	-	-	-	-	-	-	-	-	-	-	-	-	-	-	-	-
5	108220865	C	A	Ccdc18	ENSMUST00000047677.8	c.3852C>A	p.Val1284Val	synonymous_variant	1	-	-	-	-	-	-	-	-	-	-	-	-	-	-	-	-	-	-	-	-	-	-	-	-	-	-	-	-	-	-	-	-	-	-	-	-	-	-	-	-
5	108681774	G	T	Idua	ENSMUST00000071650.12	c.1502G>T	p.Arg501Leu	missense_variant	1	-	-	-	-	-	-	-	-	-	-	-	-	-	-	-	-	-	-	-	-	-	-	-	-	-	-	-	-	-	-	-	-	-	-	-	-	-	-	-	-
5	108847787	T	C	Vmn2r9	ENSMUST00000170419.1	c.994A>G	p.Met332Val	missense_variant	1	-	-	-	-	-	-	-	-	-	-	-	-	-	-	-	-	-	-	-	-	-	-	-	-	-	-	-	-	-	-	-	-	-	-	-	-	-	-	-	-
5	109174018	T	G	Vmn2r13	ENSMUST00000053253.8	c.812A>C	p.Glu271Ala	missense_variant	1	-	-	-	-	-	-	-	-	-	-	-	-	-	-	-	-	-	-	-	-	-	-	-	-	-	-	-	-	-	-	-	-	-	-	-	-	-	-	-	-
5	110107989	G	T	Gtpbp6	ENSMUST00000077220.13	c.183C>A	p.Asp61Glu	missense_variant	3	-	-	-	-	-	-	-	-	-	-	-	-	-	-	-	-	-	-	-	-	-	-	-	-	-	-	-	-	-	-	-	-	-	-	-	-	-	-	-	-
5	110187842	G	T	Golga3	ENSMUST00000031477.8	c.1021G>T	p.Val341Phe	missense_variant	2	-	-	-	-	-	-	-	-	-	-	-	-	-	0.831 (59/71)	-	-	-	-	-	-	-	-	-	-	-	-	-	-	-	-	-	-	-	-	-	-	-	-	-	-
5	110653212	C	G	Noc4l	ENSMUST00000042147.5	c.117+11G>C		intron_variant	1	-	-	-	-	-	-	-	-	-	-	-	-	-	-	-	-	-	-	-	-	-	-	-	-	-	-	-	-	-	-	-	-	-	-	-	-	-	-	-	-
5	110830889	G	GCACACCA	Hscb	ENSMUST00000056937.11	c.613+40_613+46dupTGGTGTG		intron_variant	1	-	-	-	-	-	-	-	-	-	-	-	-	-	-	-	-	-	-	-	-	-	-	-	-	-	-	-	-	-	-	-	-	-	-	-	-	-	-	-	-
5	111421642	C	CA	Mn1	ENSMUST00000094463.4	c.3483dupA	p.Ala1162fs	frameshift_variant	2	-	-	-	-	-	-	-	-	-	-	-	-	-	-	0.1176 (4/34)	-	-	-	-	-	-	-	-	-	-	-	-	-	-	-	-	-	-	-	-	-	-	-	-	-
5	114411080	A	C	Ube3b	ENSMUST00000074002.11	c.2144A>C	p.Lys715Thr	missense_variant	1	-	-	-	-	-	-	-	-	-	0.2981 (31/104)	-	-	-	-	-	-	-	-	-	-	-	-	-	-	-	-	-	-	-	-	-	-	-	-	-	-	-	-	-	-
5	114452862	GTC	G	Mvk	ENSMUST00000112239.8	c.668-4_668-3delCT		splice_region_variant&intron_variant	1	-	-	-	-	-	-	-	-	-	-	-	-	-	-	-	-	-	-	-	-	-	-	-	-	-	-	-	-	-	-	-	-	-	-	-	-	-	-	-	-
5	114623753	G	GT	Trpv4	ENSMUST00000071968.8	c.2337-25dupA		intron_variant	1	-	-	-	-	-	-	-	-	-	-	-	-	-	-	-	-	-	-	-	-	-	-	-	-	-	-	-	-	-	-	-	-	-	-	-	-	-	-	-	-
5	115257056	C	T	Rnf10	ENSMUST00000112097.7	c.472G>A	p.Glu158Lys	missense_variant	2	-	-	-	-	-	-	-	-	-	-	-	-	-	-	-	-	-	-	-	0.1624 (32/197)	-	0.1144 (31/271)	-	-	-	-	-	-	-	-	-	-	-	-	-	-	-	-	-	-
5	115576151	C	T	Gcn1l1	ENSMUST00000064454.11	c.349C>T	p.Leu117Leu	synonymous_variant	1	-	-	-	0.4286 (9/21)	-	-	-	-	-	-	-	-	-	-	-	-	-	-	-	-	-	-	-	-	-	-	-	-	-	-	-	-	-	-	-	-	-	-	-	-
5	116006358	C	CA	Cit	ENSMUSG00000029516	n.116006365dupA		intragenic_variant	1	-	-	-	-	-	-	-	-	-	-	-	-	-	-	-	-	-	-	-	-	-	-	-	-	-	-	-	-	-	-	-	-	-	-	-	-	-	-	-	-
5	116020388	G	A	Prkab1	ENSMUST00000031486.13	c.403C>T	p.His135Tyr	missense_variant	2	-	-	-	-	-	-	-	-	-	-	-	-	-	-	-	-	-	-	-	-	-	-	-	-	-	-	-	-	-	-	-	-	-	-	-	-	-	-	-	-
5	117215340	C	A	Taok3	ENSMUST00000092889.11	c.644-9C>A		intron_variant	1	-	-	-	-	-	-	-	-	-	-	-	-	-	-	-	-	-	-	-	-	-	-	-	-	-	-	-	-	-	-	-	-	-	-	-	-	-	-	-	-
5	117387900	A	C	Rfc5	ENSMUST00000086461.12	c.96T>G	p.Asp32Glu	missense_variant	1	-	-	-	0.1935 (12/62)	-	-	-	-	-	-	-	-	-	-	-	-	-	-	-	-	-	-	-	-	-	-	-	-	-	-	-	-	-	-	-	-	-	-	-	-
5	120676852	TGAC	T	Rasal1	ENSMUST00000031606.9	c.2168_2170delACG	p.Asp723del	disruptive_inframe_deletion	2	-	-	-	-	-	-	-	-	-	-	-	-	-	-	-	-	-	-	-	-	-	-	-	-	-	-	-	-	-	-	-	-	-	-	-	-	0.2673 (27/101)	-	-	-
5	120802125	C	A	Oas1c	ENSMUST00000117193.7	c.975G>T	p.Leu325Leu	synonymous_variant	2	-	-	-	-	-	-	-	-	-	-	-	-	-	-	-	-	-	-	-	-	-	-	-	-	-	-	-	-	-	-	-	-	-	-	-	0.381 (56/147)	-	-	-	-
5	120802125	C	A	Gm43069	ENSMUST00000201006.1	n.534-647C>A		intron_variant	2	-	-	-	-	-	-	-	-	-	-	-	-	-	-	-	-	-	-	-	-	-	-	-	-	-	-	-	-	-	-	-	-	-	-	-	0.381 (56/147)	-	-	-	-
5	120812854	C	T	Oas1b	ENSMUST00000183291.1	c.154C>T	p.Arg52*	stop_gained	1	-	-	-	-	-	-	-	-	-	-	-	-	-	-	-	-	-	-	-	-	-	-	-	-	-	-	-	-	-	-	-	-	-	-	-	-	-	-	-	-
5	121439297	G	T	Naa25	ENSMUST00000042163.14	c.2650-38G>T		intron_variant	1	-	-	-	-	-	-	-	-	-	-	-	-	-	-	-	-	-	-	-	-	-	-	-	-	-	-	-	-	-	-	-	-	-	-	-	-	-	-	-	-
5	121439297	G	T	Erp29	ENSMUSG00000029616	n.121439297C>A		intragenic_variant	1	-	-	-	-	-	-	-	-	-	-	-	-	-	-	-	-	-	-	-	-	-	-	-	-	-	-	-	-	-	-	-	-	-	-	-	-	-	-	-	-
5	121517848	A	G	Tmem116	ENSMUSG00000029452	n.121517848A>G		intragenic_variant	1	-	-	-	-	-	-	-	-	-	-	-	-	-	0.225 (18/80)	-	-	-	-	-	-	-	-	-	-	-	-	-	-	-	-	-	-	-	-	-	-	-	-	-	-
5	122331638	T	C	Rad9b	ENSMUST00000049009.6	c.932A>G	p.Glu311Gly	missense_variant	2	-	-	-	-	-	-	-	-	-	-	-	-	-	-	-	-	-	-	-	-	-	-	-	-	-	-	-	-	-	-	-	-	-	-	-	-	-	-	-	-
5	122380044	G	A	Gpn3	ENSMUST00000031420.10	c.389G>A	p.Trp130*	stop_gained	1	-	-	-	-	-	-	-	-	-	-	-	-	-	-	-	-	-	-	-	-	-	-	-	-	-	-	-	-	-	-	-	-	-	-	-	-	-	-	-	-
5	122439303	G	GT	Anapc7	ENSMUST00000031422.9	c.936-7dupT		splice_region_variant&intron_variant	1	-	-	-	-	-	-	-	-	-	-	-	-	-	-	-	-	-	-	-	-	-	-	-	-	-	-	-	-	-	-	-	-	-	-	-	-	-	-	-	-
5	122456994	C	A	Atp2a2	ENSMUST00000031423.9	c.*157G>T		3_prime_UTR_variant	1	-	-	-	0.4473 (229/512)	-	-	-	-	-	-	-	-	-	-	-	-	-	-	-	-	-	-	-	-	-	-	-	-	-	-	-	-	-	-	-	-	-	-	-	-
5	122788279	G	A	Anapc5	ENSMUST00000086216.8	c.2011+23C>T		intron_variant	1	-	-	-	-	-	-	-	-	-	-	-	-	-	-	-	-	-	-	-	-	-	-	-	-	-	-	-	-	-	-	-	-	-	-	-	-	-	-	-	-
5	123114596	C	T	Tmem120b	ENSMUST00000067505.14	c.646C>T	p.Arg216*	stop_gained	1	-	-	-	-	-	-	-	-	-	-	-	-	-	-	-	-	-	-	-	-	-	-	-	-	-	-	-	-	-	-	-	-	-	-	-	-	-	-	-	-
5	123114596	C	T	Gm26745	ENSMUST00000181022.1	n.1850-67199G>A		intron_variant	1	-	-	-	-	-	-	-	-	-	-	-	-	-	-	-	-	-	-	-	-	-	-	-	-	-	-	-	-	-	-	-	-	-	-	-	-	-	-	-	-
5	123114596	C	T	Rhof	ENSMUSG00000029449	n.123114596G>A		intragenic_variant	1	-	-	-	-	-	-	-	-	-	-	-	-	-	-	-	-	-	-	-	-	-	-	-	-	-	-	-	-	-	-	-	-	-	-	-	-	-	-	-	-
5	123492376	G	A	Lrrc43	ENSMUST00000094327.9	c.301G>A	p.Ala101Thr	missense_variant	1	-	-	-	-	-	-	-	-	-	-	-	-	-	-	-	-	-	-	-	-	-	-	-	-	-	-	-	-	-	-	-	-	-	-	-	-	-	-	-	-
5	123776590	G	GA	Kntc1	ENSMUST00000031366.11	c.1978dupA	p.Thr660fs	frameshift_variant	1	-	-	-	-	-	-	-	-	-	-	-	-	-	-	-	-	-	-	-	-	-	-	-	-	-	-	-	-	-	-	-	-	-	-	-	-	-	-	-	-
5	124298692	G	A	Mphosph9	ENSMUST00000184951.7	c.1588C>T	p.Pro530Ser	missense_variant	2	-	-	-	-	-	-	-	-	-	-	-	-	-	-	-	-	-	-	-	-	-	-	-	-	-	-	-	-	-	-	-	-	-	-	-	-	-	-	-	-
5	124615176	C	T	Tctn2	ENSMUST00000125191.7	n.1202C>T		non_coding_transcript_exon_variant	2	-	-	-	-	-	-	-	-	-	-	-	-	-	-	-	-	-	-	-	-	-	-	-	-	-	-	-	-	-	-	-	-	-	-	-	-	-	-	-	-
5	124768770	T	G	Dnah10	ENSMUST00000058440.11	c.4398-26T>G		intron_variant	1	-	-	-	-	-	-	-	-	-	-	-	-	-	-	-	-	-	-	-	-	-	-	-	-	-	-	-	-	-	-	-	-	-	-	-	-	-	-	-	-
5	124775400	C	A	Dnah10	ENSMUST00000058440.11	c.5692C>A	p.Arg1898Ser	missense_variant	1	-	-	-	-	-	-	-	-	-	-	-	-	-	-	-	-	-	-	-	-	-	-	-	-	-	-	-	-	-	-	-	-	-	-	-	-	-	-	-	-
5	125055850	C	A	Ncor2	ENSMUST00000111402.8	c.1890G>T	p.Trp630Cys	missense_variant	1	-	-	-	-	-	-	-	-	-	-	-	-	-	-	-	-	-	-	-	-	-	-	-	-	-	-	-	-	-	-	-	-	-	-	-	-	-	-	-	-
5	129128475	G	A	Adgrd1	ENSMUST00000056617.13	c.587-379G>A		intron_variant	1	-	-	-	-	-	-	-	-	-	-	-	-	-	-	-	-	-	-	-	-	-	-	-	-	-	-	-	-	-	-	-	-	-	-	-	-	-	-	-	-
5	129128475	G	A	Rps16-ps2	ENSMUST00000140155.1	n.43C>T		non_coding_transcript_exon_variant	1	-	-	-	-	-	-	-	-	-	-	-	-	-	-	-	-	-	-	-	-	-	-	-	-	-	-	-	-	-	-	-	-	-	-	-	-	-	-	-	-
5	129769261	A	G	Psph	ENSMUST00000031399.12	c.399T>C	p.Asn133Asn	synonymous_variant	2	-	-	-	-	-	-	-	-	-	-	-	-	-	-	-	-	-	-	-	-	-	-	-	-	-	-	-	-	-	-	-	-	-	-	-	-	-	-	-	-
5	129993450	A	G	Gusb	ENSMUST00000026613.13	c.1609T>C	p.Tyr537His	missense_variant	2	-	-	-	-	-	-	-	-	-	-	-	-	-	-	-	-	-	0.1991 (45/226)	-	-	-	-	-	-	-	-	0.196 (39/199)	-	-	-	-	-	-	-	-	-	-	-	-	-
5	135168477	C	T	Bcl7b	ENSMUST00000031692.11	c.-30C>T		5_prime_UTR_variant	1	-	-	-	-	-	-	-	-	-	-	-	-	-	-	-	-	-	-	-	-	-	-	-	-	-	-	-	-	-	-	-	-	-	-	-	-	-	-	-	-
5	136032429	A	C	Dtx2	ENSMUST00000111142.8	c.1802A>C	p.Asn601Thr	missense_variant	2	-	-	-	-	-	-	-	-	-	-	-	-	-	-	-	-	-	-	-	-	-	-	-	-	-	-	-	-	-	-	-	-	-	-	-	-	-	-	-	-
5	136757743	C	T	Col26a1	ENSMUST00000057497.12	c.493G>A	p.Asp165Asn	missense_variant	1	-	-	-	-	-	-	-	-	-	-	-	-	-	-	-	-	-	-	-	-	-	-	-	-	-	-	-	-	-	-	-	-	-	-	-	-	-	-	-	-
5	136912951	A	G	Ift22	ENSMUST00000200157.4	c.536A>G	p.Glu179Gly	missense_variant	1	-	-	-	-	-	-	-	-	-	-	-	-	-	-	-	-	-	-	-	-	-	-	-	-	-	-	-	-	-	-	-	-	-	-	0.1011 (9/89)	-	-	-	-	-
5	136994224	C	T	Plod3	ENSMUST00000004968.10	c.1879C>T	p.Leu627Phe	missense_variant	1	-	-	-	-	-	-	-	-	-	-	-	-	-	-	-	-	-	-	-	-	-	-	-	-	-	-	-	-	-	-	-	-	-	-	-	-	-	-	-	-
5	137529442	C	A	Gnb2	ENSMUST00000111027.7	c.623+1G>T		splice_donor_variant&intron_variant	1	-	-	-	-	-	-	-	-	-	-	-	-	-	-	-	0.125 (5/40)	-	-	-	-	-	-	-	-	-	-	-	-	-	-	-	-	-	-	-	-	-	-	-	-
5	137529442	C	A	Epo	ENSMUSG00000029711	n.137529442G>T		intragenic_variant	1	-	-	-	-	-	-	-	-	-	-	-	-	-	-	-	0.125 (5/40)	-	-	-	-	-	-	-	-	-	-	-	-	-	-	-	-	-	-	-	-	-	-	-	-
5	138265746	C	CT	Gal3st4	ENSMUST00000100530.7	c.989dupA	p.Gln331fs	frameshift_variant	1	-	-	-	-	-	-	-	-	-	-	-	-	-	-	-	-	-	-	-	-	-	-	-	-	-	-	-	-	-	-	-	-	-	-	0.25 (4/16)	-	-	-	-	-
5	138265746	C	CT	Gm43720	ENSMUST00000159067.4	c.*4668dupA		3_prime_UTR_variant	1	-	-	-	-	-	-	-	-	-	-	-	-	-	-	-	-	-	-	-	-	-	-	-	-	-	-	-	-	-	-	-	-	-	-	0.25 (4/16)	-	-	-	-	-
5	138265746	C	CT	6330418K02Rik	ENSMUST00000125662.1	n.358dupT		non_coding_transcript_exon_variant	1	-	-	-	-	-	-	-	-	-	-	-	-	-	-	-	-	-	-	-	-	-	-	-	-	-	-	-	-	-	-	-	-	-	-	0.25 (4/16)	-	-	-	-	-
5	138611820	G	A	Zfp68	ENSMUST00000063262.10	c.238+4C>T		splice_region_variant&intron_variant	1	-	-	-	-	-	-	-	-	-	-	-	-	-	-	-	-	-	-	-	-	-	-	-	-	-	-	-	-	-	-	-	-	-	-	-	-	-	-	-	-
5	139395536	C	A	Gpr146	ENSMUST00000051293.7	c.*2090C>A		3_prime_UTR_variant	1	-	-	-	-	-	-	-	-	-	-	-	-	-	-	-	-	-	-	-	-	-	-	-	-	-	-	-	-	-	-	-	-	-	-	-	-	-	-	-	-
5	139395536	C	A	3110082I17Rik	ENSMUST00000066052.11	c.130-31373G>T		intron_variant	1	-	-	-	-	-	-	-	-	-	-	-	-	-	-	-	-	-	-	-	-	-	-	-	-	-	-	-	-	-	-	-	-	-	-	-	-	-	-	-	-
5	139807671	A	G	Tmem184a	ENSMUST00000044002.9	c.674T>C	p.Leu225Pro	missense_variant	1	-	-	-	-	-	-	-	-	-	-	-	-	-	-	-	-	-	-	-	-	-	-	-	-	-	-	-	-	-	-	-	-	-	-	-	-	-	-	-	-
5	139974627	G	GA	Elfn1	ENSMUST00000050519.7	c.*907dupA		3_prime_UTR_variant	1	-	-	-	-	-	-	-	-	-	-	-	-	-	-	-	-	-	-	-	-	-	-	-	-	-	-	-	-	-	-	-	-	-	-	-	-	-	-	-	-
5	140065993	G	A	Mad1l1	ENSMUST00000031534.8	c.1816C>T	p.Gln606*	stop_gained	1	-	-	-	-	-	-	-	-	-	-	-	-	-	-	-	-	-	-	-	-	-	-	-	-	-	-	-	-	-	-	-	-	-	-	-	-	-	-	-	-
5	143218724	T	A	Spdye4a	ENSMUST00000085733.8	c.797A>T	p.Asn266Ile	missense_variant	1	-	-	-	-	-	-	-	-	-	-	-	-	-	-	-	-	-	-	-	-	-	-	-	-	-	-	-	-	-	-	-	-	-	-	-	-	-	-	-	-
5	143315101	G	T	E130309D02Rik	ENSMUST00000046418.2	c.-7C>A		5_prime_UTR_variant	1	-	-	-	-	-	-	-	-	-	-	-	-	-	-	-	-	-	-	-	-	-	-	-	-	-	-	-	-	-	-	-	-	-	-	-	-	-	-	-	-
5	143315101	G	T	Gm42501	ENSMUST00000200220.1	n.263G>T		non_coding_transcript_exon_variant	1	-	-	-	-	-	-	-	-	-	-	-	-	-	-	-	-	-	-	-	-	-	-	-	-	-	-	-	-	-	-	-	-	-	-	-	-	-	-	-	-
5	145140041	T	A	Pdap1	ENSMUST00000031627.8	c.-62A>T		5_prime_UTR_variant	1	-	-	-	-	-	-	-	-	-	0.6667 (18/27)	-	-	-	-	-	-	-	-	-	-	-	-	-	-	-	-	-	-	-	-	-	-	-	-	-	-	-	-	-	-
5	145151361	C	T	Ptcd1	ENSMUST00000031628.9	c.1839G>A	p.Gln613Gln	synonymous_variant	1	-	-	-	-	-	-	-	-	-	-	-	-	-	-	-	-	-	-	-	-	-	-	-	-	-	-	-	-	-	-	-	-	-	-	-	-	-	-	-	-
5	145152206	C	T	Ptcd1	ENSMUST00000031628.9	c.1643G>A	p.Gly548Glu	missense_variant	1	-	-	-	-	-	-	-	-	-	-	-	-	-	-	-	-	-	-	-	-	-	-	-	-	-	-	-	-	-	-	-	-	-	-	-	-	-	-	-	-
5	145166975	G	A	Ptcd1	ENSMUST00000031628.9	c.-48C>T		5_prime_UTR_variant	2	-	-	-	-	-	-	-	-	-	-	-	-	-	-	-	-	-	-	-	-	-	-	-	-	-	-	-	-	-	-	-	-	-	-	-	-	-	-	-	-
5	145705843	C	G	Cyp3a41a	ENSMUST00000094111.5	c.705G>C	p.Met235Ile	missense_variant	1	-	-	-	-	-	-	-	-	-	-	-	-	-	0.2697 (24/89)	-	-	-	-	-	-	-	-	-	-	-	-	-	-	-	-	-	-	-	-	-	-	-	-	-	-
5	149050965	G	GA	Hmgb1	ENSMUST00000085546.12	c.-14-215dupT		intron_variant	1	-	-	-	-	-	-	-	-	-	-	-	-	-	-	-	-	-	-	-	-	-	-	-	-	-	-	-	-	-	-	-	-	-	-	-	-	-	-	-	-
5	149460877	C	T	Tex26	ENSMUST00000201683.3	c.514C>T	p.Arg172Trp	missense_variant	1	-	-	-	-	-	-	-	-	-	-	-	-	-	-	-	-	-	-	-	-	-	-	-	-	-	-	-	-	-	-	-	-	-	-	-	0.4535 (39/86)	-	-	-	-
5	150496260	G	T	Fry	ENSMUST00000087204.8	c.8898G>T	p.Gln2966His	missense_variant	1	-	-	-	-	-	-	-	-	-	-	-	-	-	-	-	-	-	-	-	-	-	-	-	-	-	-	-	-	-	-	-	-	-	-	-	-	-	-	-	-
5	150536125	G	A	Brca2	ENSMUST00000044620.10	c.864G>A	p.Glu288Glu	synonymous_variant	1	-	-	-	-	-	-	-	-	-	-	-	-	-	-	-	-	-	-	-	-	-	-	-	-	-	-	-	-	-	-	-	-	-	-	-	-	-	-	-	-
5	150800988	G	T	Pds5b	ENSMUST00000038900.14	c.4035G>T	p.Gln1345His	missense_variant	2	-	-	-	-	-	-	-	-	-	-	-	-	-	-	-	-	-	-	-	-	-	-	-	-	-	-	-	-	-	-	-	-	-	-	-	-	-	-	-	-
6	4758723	A	AT	Peg10	ENSMUST00000166678.1	c.*1493dupT		3_prime_UTR_variant	1	-	-	-	-	-	-	-	-	-	-	-	-	-	-	-	-	-	-	-	-	-	-	-	-	-	-	-	-	-	-	-	-	-	-	-	-	-	-	-	-
6	4759590	C	CT	Peg10	ENSMUST00000166678.1	c.*2359dupT		3_prime_UTR_variant	1	-	-	-	-	-	-	-	-	-	-	-	-	-	-	-	-	-	0.1143 (4/35)	-	-	-	-	-	-	-	-	-	-	-	-	-	-	-	-	-	-	-	-	-	-
6	5961927	C	A	Dync1i1	ENSMUST00000115555.7	c.1107C>A	p.Asp369Glu	missense_variant	1	-	-	-	-	-	-	-	-	-	-	-	-	-	-	-	-	-	-	-	-	-	-	-	-	-	-	-	-	-	-	-	-	-	-	-	-	-	-	-	-
6	6109999	C	T	Slc25a13	ENSMUST00000015256.14	c.959G>A	p.Arg320Gln	missense_variant	2	-	-	-	-	-	-	-	-	-	-	-	-	-	-	-	-	-	-	-	-	-	-	-	-	-	-	-	-	-	-	-	-	-	-	-	-	-	-	-	-
6	14718920	G	GT	Ppp1r3a	ENSMUST00000045096.5	c.1993dupA	p.Thr665fs	frameshift_variant	1	-	-	-	-	-	-	-	-	-	-	-	-	-	-	-	0.2353 (4/17)	-	-	-	-	-	-	-	-	-	-	-	-	-	-	-	-	-	-	-	-	-	-	-	-
6	17100400	A	C	Tes	ENSMUST00000115467.10	c.1031A>C	p.Lys344Thr	missense_variant	1	-	-	-	-	-	-	-	-	-	-	-	-	-	-	-	-	-	-	-	-	-	0.2514 (44/175)	-	-	-	-	-	-	-	-	-	-	-	-	-	-	-	-	-	-
6	17100400	A	C	Gm4876	ENSMUST00000139701.1	n.464-13157T>G		intron_variant	1	-	-	-	-	-	-	-	-	-	-	-	-	-	-	-	-	-	-	-	-	-	0.2514 (44/175)	-	-	-	-	-	-	-	-	-	-	-	-	-	-	-	-	-	-
6	17281511	G	C	Cav2	ENSMUST00000000058.6	c.150+1G>C		splice_donor_variant&intron_variant	1	-	-	-	-	-	-	-	-	-	-	-	-	-	-	-	0.6852 (37/54)	-	-	-	-	-	-	-	-	-	-	-	-	-	-	-	-	-	-	-	-	-	-	-	-
6	17281511	G	C	Gm15581	ENSMUST00000131334.1	n.140-66438C>G		intron_variant	1	-	-	-	-	-	-	-	-	-	-	-	-	-	-	-	0.6852 (37/54)	-	-	-	-	-	-	-	-	-	-	-	-	-	-	-	-	-	-	-	-	-	-	-	-
6	17555544	T	G	Met	ENSMUST00000080469.11	c.3254-3T>G		splice_region_variant&intron_variant	2	-	-	-	-	-	-	-	-	-	-	-	-	-	-	-	-	-	-	-	-	-	-	-	-	-	-	-	-	-	-	0.2778 (5/18)	-	-	-	-	-	-	-	-	-
6	18109016	C	A	Asz1	ENSMUST00000010940.10	c.21G>T	p.Arg7Ser	missense_variant	1	-	-	-	-	-	-	-	-	-	-	-	-	-	-	-	-	-	-	-	-	-	-	-	-	-	-	-	-	-	-	-	-	-	-	-	-	-	-	-	-
6	21851044	C	A	Tspan12	ENSMUST00000031678.9	c.32G>T	p.Arg11Leu	missense_variant	2	-	-	-	-	-	-	-	-	-	-	-	-	-	-	-	-	-	-	-	-	-	-	-	-	-	-	-	-	-	-	-	-	-	-	-	-	-	-	-	-
6	22088692	T	C	Cped1	ENSMUST00000115383.8	c.753T>C	p.Asn251Asn	synonymous_variant	2	-	-	-	-	-	-	-	-	-	-	-	-	-	-	-	-	-	-	-	-	-	-	-	-	-	-	-	-	-	-	-	-	-	-	-	-	-	-	-	-
6	22321344	C	G	Fam3c	ENSMUST00000163963.7	c.427G>C	p.Asp143His	missense_variant	2	-	-	-	-	-	-	-	-	-	-	-	-	-	-	-	-	-	-	-	-	-	-	-	-	-	-	-	-	-	-	-	-	-	-	-	-	-	-	-	-
6	28425169	C	T	Arf5	ENSMUST00000020717.11	c.259-4C>T		splice_region_variant&intron_variant	1	-	-	-	-	-	-	-	-	-	-	-	-	-	-	-	-	-	-	-	-	-	-	-	-	-	-	-	-	-	-	-	-	-	-	-	-	-	-	-	-
6	28425169	C	T	Gcc1	ENSMUST00000064377.6	c.-67+2933G>A		intron_variant	1	-	-	-	-	-	-	-	-	-	-	-	-	-	-	-	-	-	-	-	-	-	-	-	-	-	-	-	-	-	-	-	-	-	-	-	-	-	-	-	-
6	29160180	C	T	Rbm28	ENSMUST00000007993.15	c.134G>A	p.Arg45Gln	missense_variant	2	-	-	-	-	-	-	-	-	-	-	-	-	-	-	-	-	-	-	-	-	-	-	-	-	-	-	-	-	-	-	-	-	-	-	-	-	-	-	-	-
6	29536662	T	C	Irf5	ENSMUST00000004392.11	c.1371T>C	p.Phe457Phe	synonymous_variant	2	-	-	-	-	-	-	-	-	-	-	-	-	-	-	-	-	-	-	-	-	-	-	-	-	-	-	-	-	-	-	-	-	-	-	-	-	-	-	-	-
6	29923930	C	T	Strip2	ENSMUST00000046028.11	c.242C>T	p.Thr81Met	missense_variant	1	-	-	-	-	-	-	-	-	-	-	-	-	-	-	-	-	-	-	-	-	-	-	-	-	-	-	-	-	-	-	-	-	-	-	-	-	-	0.3352 (60/179)	-	-
6	30519451	G	A	Ssmem1	ENSMUST00000031798.13	c.278G>A	p.Gly93Glu	missense_variant	1	-	-	-	-	-	-	-	-	-	-	-	-	-	-	-	-	-	-	-	-	-	-	-	-	-	-	-	-	-	-	-	-	-	-	-	-	-	-	-	-
6	30590868	C	G	Cpa4	ENSMUST00000049251.5	c.1164C>G	p.Tyr388*	stop_gained	1	-	-	-	-	-	-	-	-	-	-	0.3934 (48/122)	-	-	-	-	-	-	-	-	-	-	-	-	-	-	-	-	-	-	-	-	-	-	-	-	-	-	-	-	-
6	31063157	T	A	Gm27019	ENSMUST00000183056.1	n.339A>T		non_coding_transcript_exon_variant	1	-	-	-	-	-	-	-	-	-	-	-	-	-	-	-	-	-	-	-	-	-	-	-	-	-	-	-	-	-	-	-	-	-	-	-	-	-	-	-	-
6	31507643	A	T	Mkln1	ENSMUST00000026699.14	c.2105A>T	p.His702Leu	missense_variant	1	-	-	-	-	-	-	-	-	-	-	-	-	-	-	-	-	-	-	-	-	-	-	-	-	-	-	-	-	-	-	-	-	-	-	-	-	-	-	-	-
6	38312414	C	G	Zc3hav1	ENSMUST00000114900.7	c.2437G>C	p.Val813Leu	missense_variant	1	-	-	-	-	-	-	-	-	-	-	-	-	-	-	-	-	-	-	-	0.1311 (8/61)	-	-	-	-	-	-	-	-	-	-	-	-	-	-	-	-	-	-	-	-
6	39139043	A	G	Kdm7a	ENSMUST00000002305.8	c.*4168T>C		3_prime_UTR_variant	1	-	-	-	-	-	-	-	-	-	-	-	-	-	-	0.2647 (9/34)	-	-	-	-	-	-	-	-	-	-	-	-	-	-	-	-	-	-	-	-	-	-	-	-	-
6	39139043	A	G	4930599N23Rik	ENSMUST00000146981.1	n.349-1117A>G		intron_variant	1	-	-	-	-	-	-	-	-	-	-	-	-	-	-	0.2647 (9/34)	-	-	-	-	-	-	-	-	-	-	-	-	-	-	-	-	-	-	-	-	-	-	-	-	-
6	39389624	T	C	Rab19	ENSMUST00000031986.4	c.472T>C	p.Leu158Leu	synonymous_variant	1	-	-	-	-	-	-	-	-	-	-	-	-	-	-	-	-	-	-	-	-	-	-	-	-	-	-	-	-	-	-	-	-	-	-	-	-	-	-	-	-
6	40579483	G	A	Clec5a	ENSMUST00000129948.8	c.352-4C>T		splice_region_variant&intron_variant	1	-	-	-	-	-	-	-	-	-	-	-	-	-	-	-	-	-	-	-	-	-	-	-	-	-	-	-	-	-	-	-	-	-	-	-	-	-	-	-	-
6	41445997	A	C	Gm10334	ENSMUST00000095999.6	c.40+29T>G		intron_variant	1	-	-	-	-	-	-	-	-	-	-	-	-	-	-	-	-	-	-	-	-	-	-	-	-	-	-	-	-	-	-	-	-	-	-	-	-	-	-	-	-
6	47523287	G	A	Cul1	ENSMUST00000031697.8	c.2030+1G>A		splice_donor_variant&intron_variant	1	-	-	-	-	-	-	-	-	-	-	-	-	-	-	-	-	-	-	-	-	-	-	-	-	-	-	-	-	-	-	-	-	-	-	-	-	0.2273 (5/22)	-	-	-
6	47931009	G	C	Zfp212	ENSMUST00000009411.8	c.921G>C	p.Lys307Asn	missense_variant	2	-	-	-	-	-	-	-	-	-	-	-	-	-	-	-	-	-	-	-	-	-	-	-	-	-	-	-	-	-	-	-	-	-	-	-	-	-	-	-	-
6	48437995	C	A	Zfp467	ENSMUST00000114560.7	c.1722G>T	p.Ser574Ser	synonymous_variant	1	-	-	-	-	-	-	-	-	-	-	-	-	-	-	-	-	-	-	-	-	-	-	-	-	-	-	-	-	-	-	-	-	-	-	-	-	-	-	-	-
6	48741354	A	C	Gimap1	ENSMUST00000054368.6	c.-21A>C		5_prime_UTR_variant	1	-	-	-	-	-	-	-	-	-	-	-	-	-	-	-	-	-	-	-	-	-	-	-	-	-	-	-	-	-	-	-	-	-	-	-	-	-	-	-	-
6	48741354	A	C	Gm28053	ENSMUST00000127537.5	c.-21A>C		5_prime_UTR_variant	1	-	-	-	-	-	-	-	-	-	-	-	-	-	-	-	-	-	-	-	-	-	-	-	-	-	-	-	-	-	-	-	-	-	-	-	-	-	-	-	-
6	48741354	A	C	Gimap1os	ENSMUST00000205172.1	n.91T>G		non_coding_transcript_exon_variant	1	-	-	-	-	-	-	-	-	-	-	-	-	-	-	-	-	-	-	-	-	-	-	-	-	-	-	-	-	-	-	-	-	-	-	-	-	-	-	-	-
6	49383054	A	C	Fam221a	ENSMUST00000060561.14	c.729A>C	p.Pro243Pro	synonymous_variant	1	-	-	-	-	-	-	-	-	-	-	-	-	-	-	-	-	-	-	-	-	-	-	-	-	-	-	-	-	-	-	-	-	-	-	-	-	-	-	-	-
6	49457834	AT	A	Stk31	ENSMUST00000024171.13	c.2763+62delT		intron_variant	1	-	-	-	-	-	-	-	-	-	-	-	-	-	-	-	-	-	-	-	-	-	-	-	-	-	-	-	-	-	-	-	-	-	-	-	-	-	-	-	-
6	51456625	C	G	Nfe2l3	ENSMUST00000005103.11	c.716C>G	p.Ser239Cys	missense_variant	2	-	-	-	-	-	-	-	-	-	-	-	-	-	-	-	-	-	-	-	-	-	-	-	-	-	-	-	-	-	-	-	-	-	-	-	-	-	0.3706 (63/170)	-	-
6	51467437	G	GA	Hnrnpa2b1	ENSMUST00000114459.7	c.7-12dupT		intron_variant	1	-	-	-	-	-	-	-	-	-	-	-	-	-	-	-	-	-	-	-	-	-	-	-	-	-	-	-	-	-	-	-	-	-	-	-	-	-	-	-	-
6	51482959	T	TG	Cbx3	ENSMUST00000031862.13	c.*356dupG		3_prime_UTR_variant	1	-	-	-	-	-	-	-	-	-	-	-	-	-	-	-	-	-	-	-	-	-	-	-	-	-	-	-	-	-	-	-	-	-	-	-	-	-	-	-	-
6	52169869	C	CA	Hoxa3	ENSMUST00000114434.8	c.*70dupT		3_prime_UTR_variant	1	-	-	-	-	-	-	-	-	-	-	-	-	-	-	-	-	-	-	-	-	-	-	-	-	-	-	-	-	-	-	-	-	-	-	-	-	-	-	-	-
6	52169869	C	CA	Gm28308	ENSMUST00000128102.3	c.-194-6245dupT		intron_variant	1	-	-	-	-	-	-	-	-	-	-	-	-	-	-	-	-	-	-	-	-	-	-	-	-	-	-	-	-	-	-	-	-	-	-	-	-	-	-	-	-
6	52245615	C	CA	Hoxa11	ENSMUST00000048026.9	c.104dupT	p.Leu35fs	frameshift_variant	1	-	-	-	-	-	-	-	-	-	-	-	-	-	-	-	-	-	-	-	-	-	-	-	-	-	-	-	-	-	-	-	-	-	-	-	-	-	-	-	0.2222 (4/18)
6	52245615	C	CA	Hoxa11os	ENSMUST00000156515.8	n.1229dupA		non_coding_transcript_exon_variant	1	-	-	-	-	-	-	-	-	-	-	-	-	-	-	-	-	-	-	-	-	-	-	-	-	-	-	-	-	-	-	-	-	-	-	-	-	-	-	-	0.2222 (4/18)
6	52557964	C	A	Hibadh	ENSMUST00000031788.8	c.482-52G>T		intron_variant	1	-	-	-	-	-	-	-	-	-	-	-	-	-	-	-	-	-	-	-	-	-	-	-	-	-	-	-	-	-	-	-	-	-	-	-	-	-	-	-	-
6	54425308	TC	T	9130019P16Rik	ENSMUST00000145111.7	n.901+4012delG		intron_variant	1	-	-	-	-	-	0.2696 (31/115)	-	-	-	-	-	-	-	-	-	-	-	-	-	-	-	-	-	-	-	-	-	-	-	-	-	-	-	-	-	-	-	-	-	-
6	55046430	A	C	Gars	ENSMUST00000003572.9	c.209A>C	p.Lys70Thr	missense_variant	1	-	-	-	-	-	-	-	-	-	0.332 (81/244)	-	-	-	-	-	-	-	-	-	-	-	-	-	-	-	-	-	-	-	-	-	-	-	-	-	-	-	-	-	-
6	58692432	T	C	Abcg2	ENSMUST00000031822.12	c.*42T>C		3_prime_UTR_variant	1	-	-	-	-	-	-	-	-	-	-	-	-	-	-	-	-	-	-	-	-	-	-	-	-	-	-	-	-	-	-	-	-	-	-	-	-	-	-	-	-
6	58873760	C	A	Herc3	ENSMUST00000041401.10	c.1358C>A	p.Pro453His	missense_variant	1	-	-	-	-	-	-	-	-	-	-	-	-	-	-	-	-	-	-	-	-	-	-	-	-	-	-	-	-	-	-	-	-	-	-	-	-	-	-	-	-
6	59211941	T	C	Tigd2	ENSMUST00000062626.3	c.*214T>C		3_prime_UTR_variant	1	-	-	-	-	-	-	-	-	-	-	-	-	-	-	-	-	-	-	-	-	-	-	-	-	-	-	-	-	-	-	-	-	-	-	-	-	-	-	-	-
6	64345591	C	G	Grid2	ENSMUST00000095852.4	c.1574C>G	p.Thr525Ser	missense_variant	1	-	-	-	-	-	-	-	-	-	-	-	-	-	-	-	-	-	-	-	-	-	-	-	-	-	-	-	-	-	-	-	-	-	-	-	-	-	-	-	-
6	67423581	G	C	Il23r	ENSMUST00000118364.1	c.1764C>G	p.Phe588Leu	missense_variant	1	-	-	-	-	-	-	-	-	-	-	-	-	-	-	-	-	-	-	-	-	-	-	-	-	-	-	-	-	-	-	-	-	-	-	-	-	-	-	-	-
6	67423863	C	G	Il23r	ENSMUST00000118364.1	c.1482G>C	p.Glu494Asp	missense_variant	1	-	-	-	-	-	-	-	-	-	-	-	-	-	-	-	-	-	-	-	-	-	-	-	-	-	-	-	-	-	-	-	-	-	-	-	-	-	0.4934 (75/152)	-	-
6	67942074	G	A	Igkv9-124	ENSMUST00000196768.1	c.353C>T	p.???118???	splice_region_variant&synonymous_variant	1	-	-	-	-	-	-	-	-	-	-	-	-	-	-	-	-	-	-	-	-	-	-	-	-	-	-	-	-	-	-	-	-	-	-	1.0 (42/42)	-	-	-	-	-
6	68271268	C	G	Igkv1-110-Gm43007	ENSMUSG00000093861-ENSMUSG00000104722	n.68271268C>G		intergenic_region	1	-	-	-	-	-	-	-	-	-	-	-	-	-	-	0.5366 (22/41)	-	-	-	-	-	-	-	-	-	-	-	-	-	-	-	-	-	-	-	-	-	-	-	-	-
6	68271268	C	T	Igkv1-110-Gm43007	ENSMUSG00000093861-ENSMUSG00000104722	n.68271268C>T		intergenic_region	1	-	-	-	-	-	-	-	-	-	-	-	-	-	-	-	-	-	-	-	-	-	-	-	-	-	-	-	-	-	-	-	-	-	-	0.4583 (11/24)	-	-	-	-	-
6	68631963	G	A	Igkv10-96	ENSMUST00000103328.2	c.347C>T	p.???116???	splice_region_variant&synonymous_variant	1	-	-	-	-	-	-	-	-	-	-	-	-	-	-	-	-	-	-	-	-	-	-	-	-	-	-	-	-	-	-	-	-	-	-	0.9 (36/40)	-	-	-	-	-
6	68736297	G	A	Igkv19-93	ENSMUST00000196863.1	c.347C>T	p.???116???	splice_region_variant&synonymous_variant	1	-	-	-	-	-	-	-	-	-	-	-	-	-	-	-	-	-	-	-	-	-	-	-	-	-	-	-	-	-	-	-	-	-	-	1.0 (29/29)	-	-	-	-	-
6	68769110	T	G	Igkv4-91-Igkv4-90	ENSMUSG00000076532-ENSMUSG00000076533	n.68769110T>G		intergenic_region	1	-	-	-	-	-	-	-	-	-	-	-	-	-	-	0.2 (4/20)	-	-	-	-	-	-	-	-	-	-	-	-	-	-	-	-	-	-	-	-	-	-	-	-	-
6	69858886	A	G	Igkv12-41-Igkv5-40-1	ENSMUSG00000095007-ENSMUSG00000104533	n.69858886A>G		intergenic_region	2	-	-	-	-	-	-	-	-	-	-	-	-	-	-	-	-	-	-	-	-	-	-	-	-	-	-	-	-	-	-	-	-	-	-	-	-	-	-	-	-
6	69992464	G	A	Igkv5-37-Igkv18-36	ENSMUSG00000076571-ENSMUSG00000076572	n.69992464G>A		intergenic_region	1	-	-	-	-	-	-	-	-	-	-	-	-	-	-	-	-	-	-	-	-	-	-	-	-	-	-	-	-	-	-	-	-	-	-	-	-	-	-	-	-
6	70723566	G	A	Igkj4	ENSMUST00000103408.1	c.18G>A	p.Gly6Gly	synonymous_variant	1	-	-	-	-	-	-	-	-	-	-	-	-	-	-	-	-	-	-	-	-	-	-	-	-	-	-	-	-	-	-	-	-	-	-	-	-	-	-	-	-
6	70723566	G	A	Gm43291	ENSMUST00000197227.1	n.304+4189G>A		intron_variant	1	-	-	-	-	-	-	-	-	-	-	-	-	-	-	-	-	-	-	-	-	-	-	-	-	-	-	-	-	-	-	-	-	-	-	-	-	-	-	-	-
6	70723571	A	C	Igkj4	ENSMUST00000103408.1	c.23A>C	p.Lys8Thr	missense_variant	1	-	-	-	-	-	-	-	-	-	-	-	-	-	-	-	-	-	-	-	-	-	-	-	-	-	-	-	-	-	-	-	-	-	-	-	-	-	-	-	-
6	70723571	A	C	Gm43291	ENSMUST00000197227.1	n.304+4194A>C		intron_variant	1	-	-	-	-	-	-	-	-	-	-	-	-	-	-	-	-	-	-	-	-	-	-	-	-	-	-	-	-	-	-	-	-	-	-	-	-	-	-	-	-
6	70723577	A	G	Igkj4	ENSMUST00000103408.1	c.29A>G	p.Glu10Gly	missense_variant	1	-	-	-	-	-	-	-	-	-	-	-	-	-	-	-	-	-	-	-	-	-	-	-	-	-	-	-	-	-	-	-	-	-	-	-	-	-	-	-	-
6	70723577	A	G	Gm43291	ENSMUST00000197227.1	n.304+4200A>G		intron_variant	1	-	-	-	-	-	-	-	-	-	-	-	-	-	-	-	-	-	-	-	-	-	-	-	-	-	-	-	-	-	-	-	-	-	-	-	-	-	-	-	-
6	70723914	G	A	Igkj5	ENSMUST00000199459.1	c.28G>A	p.Glu10Lys	missense_variant	1	-	-	-	-	-	-	-	-	-	-	-	-	-	-	-	-	-	-	-	-	-	-	-	-	-	-	-	-	-	-	-	-	-	-	-	-	-	-	-	-
6	70723914	G	A	Gm43291	ENSMUST00000197227.1	n.304+4537G>A		intron_variant	1	-	-	-	-	-	-	-	-	-	-	-	-	-	-	-	-	-	-	-	-	-	-	-	-	-	-	-	-	-	-	-	-	-	-	-	-	-	-	-	-
6	71977404	C	T	Polr1a	ENSMUST00000055296.10	c.4841C>T	p.Ala1614Val	missense_variant	1	-	-	-	0.1743 (19/109)	-	-	-	-	-	-	-	-	-	-	-	-	-	-	-	-	-	-	-	-	-	-	-	-	-	-	-	-	-	-	-	-	-	-	-	-
6	72788309	T	TA	Tcf7l1	ENSMUST00000114053.8	c.336dupT	p.Lys113fs	frameshift_variant	1	-	-	-	-	-	-	-	-	-	-	-	-	-	-	-	-	-	-	-	-	-	-	-	-	-	-	-	-	-	-	-	-	-	-	-	-	0.2222 (4/18)	-	-	-
6	73260498	T	G	Suclg1	ENSMUST00000064740.8	c.225T>G	p.Ala75Ala	synonymous_variant	1	-	-	-	-	-	-	-	-	-	-	-	-	-	-	-	-	-	-	-	-	-	-	-	-	-	-	-	-	-	-	-	-	-	-	-	-	-	-	-	-
6	76919894	C	T	Ctnna2	ENSMUST00000160894.7	c.2320G>A	p.Ala774Thr	missense_variant	1	-	-	-	-	-	-	-	-	-	-	-	-	-	-	-	-	-	-	-	-	-	-	-	-	-	-	-	-	-	-	-	-	-	-	-	-	-	-	-	-
6	77245331	C	CA	Lrrtm1	ENSMUST00000020400.4	c.*209dupA		3_prime_UTR_variant	1	-	-	-	-	-	-	-	-	-	-	-	-	-	-	-	-	-	-	-	-	-	-	-	-	-	-	-	-	-	-	-	-	-	-	-	-	-	-	-	-
6	77245331	C	CA	Ctnna2	ENSMUST00000160894.7	c.1096-101389dupT		intron_variant	1	-	-	-	-	-	-	-	-	-	-	-	-	-	-	-	-	-	-	-	-	-	-	-	-	-	-	-	-	-	-	-	-	-	-	-	-	-	-	-	-
6	83056632	C	T	Aup1	ENSMUST00000092618.8	c.916C>T	p.Arg306Cys	missense_variant	2	-	-	-	-	-	-	-	-	-	0.1062 (60/565)	-	-	-	-	-	-	-	-	-	-	-	-	-	-	-	-	-	-	-	-	-	-	-	-	-	-	-	-	-	-
6	83056738	A	AT	Aup1	ENSMUST00000092618.8	c.929-12dupT		intron_variant	2	-	-	-	-	-	-	-	-	-	-	-	-	-	-	-	-	-	-	-	0.25 (4/16)	-	-	-	-	-	-	-	-	-	-	-	-	-	-	-	-	-	-	-	-
6	83057359	G	A	Aup1	ENSMUST00000092618.8	c.1248G>A	p.Gln416Gln	synonymous_variant	1	-	-	-	-	-	-	-	-	-	-	-	-	-	-	-	-	-	-	-	-	-	-	-	-	-	-	-	-	-	-	-	-	-	-	-	-	-	-	-	-
6	83490451	C	A	Dguok	ENSMUST00000014698.9	c.413G>T	p.Arg138Leu	missense_variant	1	-	-	-	0.1947 (22/113)	-	-	-	-	-	-	-	-	-	-	-	-	-	-	-	-	-	-	-	-	-	-	-	-	-	-	-	-	-	-	-	-	-	-	-	-
6	83979589	A	C	Zfp638	ENSMUST00000032088.13	c.5177A>C	p.Asp1726Ala	missense_variant	2	-	-	-	-	-	-	-	-	-	-	-	-	-	-	-	-	-	-	-	-	-	-	-	-	-	-	-	-	-	-	-	-	-	-	-	-	-	-	-	-
6	84575140	A	G	Cyp26b1	ENSMUST00000077705.5	c.1015T>C	p.Cys339Arg	missense_variant	1	-	-	-	-	-	-	-	-	-	-	-	-	-	0.16 (4/25)	-	-	-	-	-	-	-	-	-	-	-	-	-	-	-	-	-	-	-	-	-	-	-	-	-	-
6	85459940	A	G	Cct7	ENSMUST00000032078.8	c.161-2A>G		splice_acceptor_variant&intron_variant	1	-	-	-	-	-	-	-	-	-	-	-	-	-	-	-	-	-	-	-	-	-	-	-	-	-	-	-	-	-	-	-	-	-	-	-	-	-	-	-	-
6	87067688	C	A	Gfpt1	ENSMUST00000032057.7	c.1008C>A	p.Asn336Lys	missense_variant	2	-	-	-	-	-	-	-	-	-	-	-	-	-	-	-	-	-	-	-	-	-	-	-	-	-	-	-	-	-	-	-	-	-	-	-	-	-	-	-	-
6	87180084	A	T	Antxr1	ENSMUST00000042025.11	c.1428+26T>A		intron_variant	1	-	-	-	-	-	-	-	-	-	-	-	-	-	-	-	-	-	-	-	-	-	-	-	-	-	-	-	-	-	-	-	-	-	-	-	-	-	-	-	-
6	87981170	C	G	H1fx	ENSMUST00000056403.6	c.187G>C	p.Gly63Arg	missense_variant	1	-	-	-	-	-	-	-	-	-	-	-	-	-	-	-	-	-	-	-	-	-	-	-	-	-	-	-	-	-	-	-	-	-	-	-	-	-	-	-	-
6	87981170	C	G	Gm5577	ENSMUST00000134600.1	n.213+75C>G		intron_variant	1	-	-	-	-	-	-	-	-	-	-	-	-	-	-	-	-	-	-	-	-	-	-	-	-	-	-	-	-	-	-	-	-	-	-	-	-	-	-	-	-
6	90369565	C	G	Zxdc	ENSMUST00000075117.9	c.-94C>G		5_prime_UTR_variant	1	-	-	-	-	-	-	-	-	-	-	-	-	-	-	-	-	-	-	-	-	-	-	-	-	-	-	-	-	-	-	-	-	-	-	-	-	-	-	-	-
6	90689782	T	C	Iqsec1	ENSMUST00000101151.9	c.1360A>G	p.Asn454Asp	missense_variant	1	-	-	-	-	-	-	-	-	-	-	-	-	-	-	-	-	-	-	-	-	-	-	-	-	-	-	-	-	-	-	-	-	-	-	-	-	-	-	-	-
6	90689782	T	C	Gm44123	ENSMUST00000204662.1	n.52T>C		non_coding_transcript_exon_variant	1	-	-	-	-	-	-	-	-	-	-	-	-	-	-	-	-	-	-	-	-	-	-	-	-	-	-	-	-	-	-	-	-	-	-	-	-	-	-	-	-
6	91788079	G	A	Grip2	ENSMUST00000162300.7	c.201C>T	p.Thr67Thr	synonymous_variant	1	0.3333 (14/42)	-	-	-	-	-	-	-	-	-	-	-	-	-	-	-	-	-	-	-	-	-	-	-	-	-	-	-	-	-	-	-	-	-	-	-	-	-	-	-
6	92189437	A	C	Rbsn	ENSMUST00000014694.10	c.2225T>G	p.Ile742Ser	missense_variant	2	-	-	-	-	-	-	-	-	-	-	-	-	-	-	-	-	-	-	-	-	-	-	-	-	-	-	-	-	-	-	-	-	-	-	-	-	-	-	-	-
6	93708115	C	T	Magi1	ENSMUST00000089317.11	c.2281G>A	p.Glu761Lys	missense_variant	1	-	-	-	-	-	-	-	-	-	-	-	-	-	-	-	-	-	-	-	-	-	-	-	-	-	-	-	-	-	-	-	-	-	-	-	-	-	-	-	-
6	94603606	C	T	Slc25a26	ENSMUST00000061118.10	c.762C>T	p.Ile254Ile	synonymous_variant	2	-	-	-	-	-	-	-	-	-	-	-	-	-	-	-	-	-	-	-	-	-	-	-	-	-	-	-	-	-	-	-	-	-	-	-	-	-	-	-	-
6	108388251	A	T	Itpr1	ENSMUST00000032192.8	c.2662A>T	p.Thr888Ser	missense_variant	1	-	-	-	-	-	-	-	-	-	-	-	-	-	-	-	-	-	-	-	-	-	-	-	-	-	-	-	-	-	-	-	-	-	-	0.2308 (6/26)	-	-	-	-	-
6	113067656	G	GT	Thumpd3	ENSMUST00000032398.14	c.1366-12dupT		intron_variant	1	-	-	-	-	-	-	-	-	-	-	-	-	-	-	-	-	-	-	-	-	-	-	-	-	-	-	-	-	-	-	-	-	-	-	-	-	-	-	-	-
6	113067656	G	GT	Gt(ROSA)26Sor	ENSMUSG00000086429	n.113067657dupA		intragenic_variant	1	-	-	-	-	-	-	-	-	-	-	-	-	-	-	-	-	-	-	-	-	-	-	-	-	-	-	-	-	-	-	-	-	-	-	-	-	-	-	-	-
6	113176573	T	A	Lhfpl4	ENSMUST00000162280.1	c.516A>T	p.Ser172Ser	synonymous_variant	1	-	-	-	-	-	-	-	-	-	-	-	-	-	-	-	-	-	-	-	-	-	-	-	-	-	-	-	-	-	-	-	-	-	-	-	-	-	-	-	-
6	113488538	G	A	Creld1	ENSMUST00000032422.5	c.428G>A	p.Cys143Tyr	missense_variant	1	-	-	-	-	-	-	-	-	-	-	-	-	-	-	-	-	-	-	-	-	-	-	-	-	-	-	-	-	-	-	-	-	-	-	-	-	-	-	-	-
6	113814082	G	T	Atp2b2	ENSMUST00000101044.8	c.398-38C>A		intron_variant	1	-	-	-	-	-	-	-	-	-	-	-	-	-	-	-	-	-	-	-	-	-	-	-	-	-	-	-	-	-	-	-	-	-	-	-	-	-	-	-	-
6	115473160	A	C	Pparg	ENSMUST00000000450.4	c.1119A>C	p.Gln373His	missense_variant	1	-	-	-	-	-	-	-	-	-	0.4167 (5/12)	-	-	-	-	-	-	-	-	-	-	-	-	-	-	-	-	-	-	-	-	-	-	-	-	-	-	-	-	-	-
6	115568703	T	G	Tsen2	ENSMUST00000040234.8	c.953T>G	p.Leu318Arg	missense_variant	3	-	-	-	-	-	-	-	-	-	-	-	-	-	-	-	-	-	-	-	-	-	-	-	-	-	-	-	-	-	-	-	-	-	-	-	-	-	-	-	-
6	115619601	G	C	Raf1	ENSMUST00000000451.13	c.1761C>G	p.Asp587Glu	missense_variant	2	-	-	-	-	-	-	-	-	-	-	-	-	-	-	-	-	-	-	-	-	-	-	-	-	-	-	-	-	-	-	-	-	-	-	-	-	-	-	-	-
6	115619601	G	C	Mkrn2	ENSMUST00000000449.8	c.*1870G>C		3_prime_UTR_variant	2	-	-	-	-	-	-	-	-	-	-	-	-	-	-	-	-	-	-	-	-	-	-	-	-	-	-	-	-	-	-	-	-	-	-	-	-	-	-	-	-
6	118417442	T	C	Bms1	ENSMUST00000032237.7	c.313A>G	p.Asn105Asp	missense_variant	1	-	-	-	-	-	-	-	-	-	-	-	-	-	-	-	-	-	-	-	-	-	-	-	-	-	-	-	-	-	-	-	-	-	-	-	-	0.1081 (4/37)	-	-	-
6	120473862	A	C	Il17ra	ENSMUST00000002976.4	c.419A>C	p.Lys140Thr	missense_variant	1	-	-	-	-	-	-	-	-	-	0.2444 (11/45)	-	-	-	-	-	-	-	-	-	-	-	-	-	-	-	-	-	-	-	-	-	-	-	-	-	-	-	-	-	-
6	120886836	C	A	Bcl2l13	ENSMUST00000009256.3	c.750C>A	p.Pro250Pro	synonymous_variant	2	0.2917 (14/48)	-	-	-	-	-	-	-	-	-	-	-	-	-	-	-	-	-	-	-	-	-	-	-	-	-	-	-	-	-	-	-	0.2667 (28/105)	-	-	-	-	-	-	-
6	121641403	C	A	A2m	ENSMUST00000032203.8	c.654C>A	p.Gly218Gly	synonymous_variant	1	-	-	-	-	-	-	-	-	-	-	-	-	-	-	-	-	-	-	-	-	-	-	-	-	-	-	-	-	-	-	-	-	-	-	-	-	-	-	-	-
6	121646847	T	C	A2m	ENSMUST00000032203.8	c.1171T>C	p.Phe391Leu	missense_variant	1	-	-	-	-	-	-	-	-	-	-	-	-	-	-	-	-	-	-	-	-	-	-	-	-	-	-	-	-	-	-	-	-	-	-	-	-	-	-	-	-
6	122312335	A	G	M6pr	ENSMUST00000007602.14	c.101A>G	p.Asp34Gly	missense_variant	1	-	-	-	-	-	-	-	-	-	-	-	-	-	-	-	-	-	-	-	-	-	-	-	-	-	-	-	-	-	-	-	-	-	-	-	-	-	-	-	-
6	122713562	C	A	Nanog	ENSMUST00000012540.4	c.*7C>A		3_prime_UTR_variant	2	-	-	-	-	-	-	-	-	-	-	-	-	-	-	-	-	-	-	-	-	-	-	-	-	-	-	-	-	-	-	-	-	-	-	-	-	-	-	-	-
6	124061528	C	G	Vmn2r26	ENSMUST00000032238.3	c.2061C>G	p.Phe687Leu	missense_variant	1	-	-	-	-	-	-	-	-	-	-	-	-	-	-	-	-	-	-	-	-	-	-	-	-	-	-	-	-	-	-	-	-	-	-	-	-	-	-	-	-
6	124522241	G	A	C1ra	ENSMUST00000068593.8	c.1385G>A	p.Arg462His	missense_variant	1	-	-	-	-	-	-	-	-	-	0.197 (39/198)	-	-	-	-	-	-	-	-	-	-	-	-	-	-	-	-	-	-	-	-	-	-	-	-	-	-	-	-	-	-
6	124702492	C	T	Lpcat3	ENSMUST00000004381.13	c.954C>T	p.Asn318Asn	synonymous_variant	9	-	-	-	-	-	-	-	-	-	-	-	-	-	-	-	-	-	0.4255 (60/141)	-	-	-	0.4045 (36/89)	-	0.4429 (93/210)	-	-	0.3772 (43/114)	-	-	-	-	-	-	-	-	-	-	-	-	-
6	124810030	T	C	Spsb2	ENSMUST00000047760.9	c.664+61T>C		intron_variant	1	-	-	-	-	-	-	-	-	-	-	-	-	-	-	-	-	-	-	-	-	-	-	-	-	-	-	-	-	-	-	-	-	-	-	-	-	-	-	-	-
6	124810100	T	C	Spsb2	ENSMUST00000047760.9	c.664+131T>C		intron_variant	1	-	-	-	-	-	-	-	-	-	-	-	-	-	-	-	-	-	-	-	-	-	-	-	-	-	-	-	-	-	-	-	-	-	-	-	-	-	-	-	-
6	125047229	C	T	Ing4	ENSMUST00000140131.7	c.295C>T	p.Arg99Trp	missense_variant	1	-	-	-	-	-	-	-	-	-	-	-	-	-	-	0.2315 (25/108)	-	-	-	-	-	-	-	-	-	-	-	-	-	-	-	-	-	-	-	-	-	-	-	-	-
6	125047229	C	T	Gm43989	ENSMUST00000205110.1	n.90+2533G>A		intron_variant	1	-	-	-	-	-	-	-	-	-	-	-	-	-	-	0.2315 (25/108)	-	-	-	-	-	-	-	-	-	-	-	-	-	-	-	-	-	-	-	-	-	-	-	-	-
6	125047229	C	T	Gm44597	ENSMUST00000203287.2	n.340C>T		non_coding_transcript_exon_variant	1	-	-	-	-	-	-	-	-	-	-	-	-	-	-	0.2315 (25/108)	-	-	-	-	-	-	-	-	-	-	-	-	-	-	-	-	-	-	-	-	-	-	-	-	-
6	125051205	A	C	Acrbp	ENSMUST00000088294.11	c.355-38A>C		intron_variant	1	-	-	-	-	-	-	-	-	-	-	-	-	-	-	-	-	-	-	-	-	-	-	-	-	-	-	-	-	-	-	-	-	-	-	-	-	-	-	-	-
6	125051205	A	C	Gm44597	ENSMUST00000203287.2	n.3335-156A>C		intron_variant	1	-	-	-	-	-	-	-	-	-	-	-	-	-	-	-	-	-	-	-	-	-	-	-	-	-	-	-	-	-	-	-	-	-	-	-	-	-	-	-	-
6	125106670	C	T	Chd4	ENSMUST00000112390.7	c.2055C>T	p.Pro685Pro	synonymous_variant	1	-	-	-	-	-	-	-	-	-	-	-	-	-	-	-	-	-	-	-	-	-	-	-	-	-	-	-	-	-	-	-	-	-	-	-	-	-	-	-	-
6	125144030	C	T	Nop2	ENSMUST00000044200.10	c.1774C>T	p.Pro592Ser	missense_variant	1	-	-	-	-	-	-	-	0.2857 (6/21)	-	-	-	-	-	-	-	-	-	-	-	-	-	-	-	-	-	-	-	-	-	-	-	-	-	-	-	-	-	-	-	-
6	125144036	C	T	Nop2	ENSMUST00000044200.10	c.1780C>T	p.Leu594Leu	synonymous_variant	1	-	-	-	-	-	-	-	0.24 (6/25)	-	-	-	-	-	-	-	-	-	-	-	-	-	-	-	-	-	-	-	-	-	-	-	-	-	-	-	-	-	-	-	-
6	125144085	A	C	Nop2	ENSMUST00000044200.10	c.1829A>C	p.Lys610Thr	missense_variant	1	-	-	-	-	-	-	-	0.2195 (9/41)	-	-	-	-	-	-	-	-	-	-	-	-	-	-	-	-	-	-	-	-	-	-	-	-	-	-	-	-	-	-	-	-
6	125144164	C	A	Nop2	ENSMUST00000044200.10	c.1908C>A	p.Asn636Lys	missense_variant	1	-	-	-	-	-	-	-	0.1754 (10/57)	-	-	-	-	-	-	-	-	-	-	-	-	-	-	-	-	-	-	-	-	-	-	-	-	-	-	-	-	-	-	-	-
6	125144170	C	T	Nop2	ENSMUST00000044200.10	c.1914C>T	p.Ile638Ile	synonymous_variant	1	-	-	-	-	-	-	-	0.1786 (10/56)	-	-	-	-	-	-	-	-	-	-	-	-	-	-	-	-	-	-	-	-	-	-	-	-	-	-	-	-	-	-	-	-
6	125642675	C	T	Vwf	ENSMUST00000112254.7	c.4315C>T	p.Leu1439Leu	synonymous_variant	1	-	-	-	-	-	-	-	-	-	-	-	-	-	-	-	-	-	-	-	-	-	-	-	-	-	-	-	-	-	-	-	-	-	-	-	-	-	-	-	-
6	128362877	G	C	Rhno1	ENSMUSG00000048668	n.128362877C>G		intragenic_variant	1	-	-	-	-	-	-	-	-	-	-	-	-	-	-	-	-	-	-	-	-	-	-	-	-	-	-	-	-	-	-	-	-	-	-	-	-	-	-	-	-
6	128433294	A	T	Fkbp4	ENSMUST00000032508.10	c.847-3T>A		splice_region_variant&intron_variant	1	-	-	-	-	-	-	-	-	-	-	-	-	-	-	-	-	-	-	-	-	-	-	-	-	-	-	-	-	-	-	-	-	-	-	-	-	-	-	-	-
6	128547234	T	C	BC048546	ENSMUST00000060574.8	c.3434A>G	p.Tyr1145Cys	missense_variant	1	-	-	-	-	-	-	-	-	-	-	-	-	0.1429 (5/35)	-	-	-	-	-	-	-	-	-	-	-	-	-	-	-	-	-	-	-	-	-	-	-	-	-	-	-
6	128981254	G	C	Clec2g	ENSMUST00000000254.13	c.432G>C	p.Pro144Pro	synonymous_variant	8	-	-	-	1.0 (14/14)	1.0 (28/28)	-	-	-	-	-	-	-	-	-	-	-	-	-	-	-	-	-	-	-	-	-	-	-	-	-	-	-	-	-	-	-	-	-	-	-
6	128981260	C	G	Clec2g	ENSMUST00000000254.13	c.438C>G	p.Asn146Lys	missense_variant	9	-	-	-	1.0 (15/15)	1.0 (31/31)	-	-	-	-	-	-	-	-	-	-	-	-	-	-	-	-	-	-	-	-	-	-	-	-	-	-	-	-	-	-	-	-	-	-	-
6	129184783	C	T	Clec2d	ENSMUST00000032260.5	c.378C>T	p.Phe126Phe	synonymous_variant	1	-	-	-	-	-	-	-	-	-	-	-	-	-	-	-	-	-	-	-	-	-	-	-	-	-	-	-	-	-	-	-	-	-	-	-	-	-	-	-	-
6	129186021	A	G	Clec2d	ENSMUST00000032260.5	c.*10A>G		3_prime_UTR_variant	2	-	-	-	-	-	-	-	-	-	-	-	-	-	-	-	-	-	-	-	-	-	-	-	-	-	0.3333 (4/12)	-	-	-	-	-	-	-	-	-	-	-	-	-	-
6	129275302	C	T	Cd69	ENSMUST00000032259.5	c.-17G>A		5_prime_UTR_variant	1	-	-	-	-	-	-	-	-	-	-	-	-	-	-	-	-	-	-	-	-	-	-	-	-	-	-	-	-	-	-	-	-	-	-	-	-	-	-	-	-
6	129972501	A	G	Gm15854	ENSMUST00000118879.1	n.687T>C		non_coding_transcript_exon_variant	1	-	-	-	-	-	-	-	-	-	-	-	-	-	-	-	-	-	-	-	-	-	-	-	-	-	-	-	-	-	-	-	-	-	-	-	-	-	-	-	-
6	130140282	C	T	Klra8-Gm24712	ENSMUSG00000089727-ENSMUSG00000096331	n.130140282C>T		intergenic_region	1	-	-	-	-	-	-	-	-	-	-	-	-	-	-	-	-	-	-	-	-	-	-	-	-	-	-	-	-	-	-	-	-	-	-	-	-	-	-	-	-
6	130140286	A	T	Klra8-Gm24712	ENSMUSG00000089727-ENSMUSG00000096331	n.130140286A>T		intergenic_region	1	-	-	-	-	-	-	-	-	-	-	-	-	-	-	-	-	-	-	-	-	-	-	-	-	-	-	-	-	-	-	-	-	-	-	-	-	-	-	-	-
6	130140346	G	T	Klra8-Gm24712	ENSMUSG00000089727-ENSMUSG00000096331	n.130140346G>T		intergenic_region	1	-	-	-	-	-	-	-	-	-	-	-	-	-	-	-	-	-	-	-	-	-	-	-	-	-	-	-	-	-	-	-	-	-	-	-	-	-	-	-	-
6	130315754	G	T	Klra13-ps-Gm24072	ENSMUSG00000030178-ENSMUSG00000094408	n.130315754G>T		intergenic_region	1	-	-	-	-	-	-	-	-	-	-	-	-	-	-	-	-	-	-	-	-	-	-	-	-	-	-	-	-	-	-	-	-	-	-	-	-	-	-	-	-
6	131293092	T	A	Magohb	ENSMUST00000032307.11	c.74A>T	p.Glu25Val	missense_variant	2	-	-	-	-	-	-	-	-	-	-	-	-	-	-	-	-	-	-	-	-	-	-	-	-	-	-	-	-	-	-	-	-	-	-	-	-	-	-	-	-
6	132115037	G	A	Gm4736	ENSMUST00000100870.5	n.333-414C>T		intron_variant	1	-	-	-	-	-	-	-	-	-	-	-	-	-	-	-	-	-	-	-	-	-	-	-	-	-	-	-	-	-	-	-	-	-	-	-	-	-	-	-	-
6	133055134	T	C	Tas2r140	ENSMUST00000095391.2	c.660A>G	p.Arg220Arg	synonymous_variant	1	-	-	-	-	-	-	-	-	-	-	-	-	-	-	-	-	-	-	-	-	-	-	-	-	-	-	-	-	-	-	-	-	-	-	-	-	-	-	-	-
6	134984264	A	G	Apold1	ENSMUST00000167323.2	c.680A>G	p.Lys227Arg	missense_variant	2	-	-	-	-	-	-	-	-	-	-	-	-	-	-	-	-	-	-	-	-	-	-	-	-	-	-	-	-	-	-	-	-	-	-	-	-	-	-	-	-
6	136609795	G	GTTC	Atf7ip	ENSMUST00000032335.12	c.*2903_*2905dupTTC		3_prime_UTR_variant	2	-	-	-	-	-	-	-	-	-	-	-	-	-	-	-	-	-	-	-	-	-	-	-	-	-	-	-	-	-	-	-	-	-	-	-	-	-	-	-	-
6	136610778	T	C	Atf7ip	ENSMUST00000032335.12	c.*3885T>C		3_prime_UTR_variant	1	-	-	-	-	-	-	-	-	-	0.1143 (4/35)	-	-	-	-	-	-	-	-	-	-	-	-	-	-	-	-	-	-	-	-	-	-	-	-	-	-	-	-	-	-
6	142566384	C	A	Kcnj8	ENSMUST00000203945.2	c.496G>T	p.Gly166Cys	missense_variant	1	-	-	-	-	-	-	-	-	-	-	-	-	-	-	-	-	-	-	-	-	-	-	-	-	-	-	-	-	-	-	-	-	-	-	-	-	-	-	-	-
6	142628542	G	GA	Abcc9	ENSMUST00000087527.10	c.2967dupT	p.Leu990fs	frameshift_variant	1	-	-	-	-	-	-	-	-	-	-	-	-	-	-	-	-	-	-	-	-	-	-	-	-	-	-	-	-	-	-	0.1111 (4/36)	-	-	-	-	-	-	-	-	-
6	142664616	G	C	Abcc9	ENSMUST00000087527.10	c.1821C>G	p.Leu607Leu	synonymous_variant	1	-	-	-	-	-	-	-	-	-	-	-	-	-	-	-	-	-	-	-	-	-	-	-	-	-	-	-	-	-	-	-	-	-	-	-	-	-	-	-	-
[truncated: 496 more rows]
[truncated: 108 more columns]
