# Supplementary material for: Identifying and Targeting Sporadic Oncogenic Genetic Aberrations in Mouse Models of Triple-Negative Breast Cancer
Source: Oxford University Press journal article supplement (doi:10.1158/2159-8290.cd-17-0679), 2017-12-04
Supplement: 21598290cd170679-sup-184854_2_supp_4402512_6zq0ly.xlsx [file 21598290cd170679-sup-184854_2_supp_4402512_6zq0ly.xlsx]

## Sheet: tumor report card
Primary tumor ID	NGS sequencing samples	Brca1 genotype	PI3K pathway alterations	MAPK pathway alterations	Hotspots	Potential oncogenic alterations	Potential actionable alterations	Potential Drug(s)
517-1	HL-WES-29 (WES) HL107 (RNAseq) HL153 (RNAseq)	WT	JAK1 (L910P)	RRAS2 (fusion)		JAK1-L910P, RHOA (overexpressed)
517-2	HL-WES-57 (WES) HL136 (RNAseq)	WT	MET (AMP), COL4A2 (AMP), COL1A2 (fusion), PDGFD (AMP), COL4A1 (AMP), YAP1 (AMP), YAP1 (overexpressed)			MET (AMP), YAP1 (overexpressed), ABL1 (fusion), YAP1 (AMP)	MET (AMP), YAP1 (AMP), YAP1 (overexpressed)	Cabozantinib Crizotinib + Verteporfin
650	HL-WES-59 (WES) HL151 (RNAseq)	DEL	CREB1 (AMP), FGFR2 (overexpressed)	MAP3K8 (AMP), FGFR2 (overexpressed)		FGFR2 (overexpressed)
666	HL-WES-58 (WES) HL152 (RNAseq)	DEL	TNC (p.Glu281* truncating)
777	HL-WES-60 (WES) HL156 (RNAseq)	WT
959	HL-WES-42 (WES) HL137 (RNAseq)	DEL	RBL2 (fusion)
968	HL-WES-61 (WES) HL157 (RNAseq)	WT	MET (AMP), MET (overexpressed), MET (fusion)			MET (AMP), MET (overexpressed)	MET (AMP), MET (overexpressed)	Cabozantinib Crizotinib
975	HL-WES-62 (WES) HL158 (RNAseq)	WT	SPP1 (fusion), FN1 (fusion)	RASGRF1 (fusion)
1205	HL-WES-43 (WES) HL138 (RNAseq)	DEL	SYK (DEL)	GADD45G (DEL)
1206	HL118 (RNAseq)	DEL
1221	HL80 (RNAseq)	DEL				RUNX1 (fusion)
1253	HL159 (RNAseq)	WT
1259	HL-WES-18 (WES) HL17 (RNAseq) HL18 (RNAseq) HL65 (RNAseq)	WT	YAP1 (AMP), YAP1 (overexpressed), MET (overexpressed)	TGFB2 (p.Thr302fs truncating)		MET (overexpressed), YAP1 (AMP), YAP1 (overexpressed)	YAP1 (AMP), YAP1 (overexpressed), MET (overexpressed)	Verteporfin Crizotinib Cabozantinib
1287	HL-WES-44 (WES) HL119 (RNAseq)	DEL				CCNE1 (overexpressed)
1290	HL140 (RNAseq)	DEL
1367	HL-WES-01 (WES) HL40 (RNAseq)	DEL	LPAR3 (AMP), GNG5 (AMP), PRKAA1 (AMP), OSMR (AMP)			RICTOR (AMP)
1397	HL-WES-19 (WES) HL160 (RNAseq) HL23 (RNAseq)	WT	COL6A2 (fusion), COL1A1 (fusion), COL6A1 (fusion), COL1A2 (fusion), FN1 (fusion), JAK1 (F958C)			RHOA (overexpressed), JAK1-F958C, KMT2A (p.Asn969fs truncating)
1400	HL-WES-64 (WES) HL120 (RNAseq) HL161 (RNAseq)	WT	MET (AMP), OSM (AMP), MET (overexpressed), GNB2 (c.623+1G>T splice variant), MET (fusion)			MET (AMP), MET (overexpressed)	MET (AMP), MET (overexpressed)	Cabozantinib Crizotinib
1411	HL-WES-45 (WES) HL141 (RNAseq)	DEL	FGFR2 (overexpressed)	MAP2K5 (fusion), FGFR2 (overexpressed)		FGFR2 (overexpressed)
1412	HL-WES-65 (WES) HL142 (RNAseq)	DEL	COL4A1 (fusion), RBL2 (DEL)			AURKB (overexpressed), EZH2 (overexpressed)	AURKB (overexpressed)	Danusertib Barasertib + Olaparib *
1413	HL-WES-02 (WES) HL74 (RNAseq)	DEL	EPO (AMP), PDGFA (AMP), GNB2 (AMP), FLT1 (AMP), YWHAG (AMP), RAC1 (AMP)	PDGFA (AMP), GNA12 (AMP), HSPB1 (AMP), RAC1 (AMP), MAPKAPK5 (AMP)		FLT3 (AMP), CDK8 (AMP), KDM5C (overexpressed), RAC1 (AMP), CARD11 (AMP)
1415	HL-WES-03 (WES) HL78 (RNAseq)	DEL	LPAR2 (DEL), COMP (DEL), PIK3R2 (DEL), JAK3 (DEL)	JUND (DEL)
1433	HL-WES-46 (WES) HL121 (RNAseq)	DEL	COL1A2 (fusion), COL6A3 (fusion)
1450	HL-WES-47 (WES) HL122 (RNAseq)	DEL	VEGFB (fusion)	MAP4K4 (fusion)		APC (p.Ile1572fs truncating)	Wnt pathway	LGK974 + Olaparib
1454	HL-WES-66 (WES) HL162 (RNAseq)	WT	PTEN (p.Asn323fs truncating), HRAS (Q61K)	FLNB (p.Leu855fs truncating), HRAS (Q61K)	HRAS (Q61)	PTEN (p.Asn323fs truncating), HRAS-Q61K	PTEN (p.Asn323fs truncating)	BYL719 + Trametinib
1457	HL123 (RNAseq)	DEL
1460	HL-WES-04 (WES) HL91 (RNAseq)	DEL	FASLG (AMP), YAP1 (DEL), FGFR2 (AMP), EPOR (DEL), FGFR2 (overexpressed), FGFR2 (fusion), CDC37 (DEL)	FASLG (AMP), JUN (DEL), FGFR2 (fusion), FGFR2 (overexpressed), FGFR2 (AMP)		SMARCA4 (DEL), YAP1 (DEL), FGFR2 (AMP), FGFR2 (overexpressed), KEAP1 (DEL), FGFR2 (fusion), KDM5C (overexpressed)	FGFR2 (AMP), FGFR2 (fusion), FGFR2 (overexpressed), YAP1 (DEL)	BGJ398 + Olaparib**
1461	HL-WES-05 (WES) HL100 (RNAseq) HL124 (RNAseq)	DEL				KDM5C (overexpressed), EZH2 (overexpressed)
1494	HL132 (RNAseq)	DEL		FLNB (fusion)		AURKB (overexpressed)	AURKB (overexpressed)	Danusertib Barasertib + Olaparib *
1507	HL-WES-48 (WES) HL125 (RNAseq)	DEL	IL3RA (AMP), CREB1 (AMP), EIF4E2 (AMP), MDM2 (AMP), FN1 (AMP), LAMA4 (AMP), GNG2 (AMP), EIF4E2 (fusion), FOXO3 (AMP), RAC1 (AMP)	CACNA1D (AMP), PTPRR (AMP), GNA12 (AMP), RAP1B (AMP), CACNA2D3 (AMP), RAC1 (AMP), PPP3CB (AMP)		AURKB (overexpressed), MDM2 (AMP), RAC1 (AMP), CARD11 (AMP)	MDM2 (AMP)	DS-3032b SAR405838 RG7112 + Olaparib or + Danusertib Barasertib*
1508	HL144 (RNAseq)	DEL				EZH2 (overexpressed)
1512	HL-WES-20 (WES) HL63 (RNAseq) HL64 (RNAseq)	WT	PPP2R5A (fusion)			SMAD3 (DEL), APC (p.Ile2181fs truncating)
1513	HL-WES-21 (WES) HL08 (RNAseq) HL47 (RNAseq)	WT	FN1 (fusion)	BRAF (fusion)		RHOA (overexpressed), BRAF (fusion)	BRAF (fusion)	PLX7904
1525	HL-WES-49 (WES) HL145 (RNAseq)	DEL	MYC (AMP)	MYC (AMP)		AURKB (overexpressed), CCNE1 (overexpressed), MYC (AMP), EZH2 (overexpressed)	AURKB (overexpressed), MYC (AMP)	Danusertib Barasertib + Quarfloxin or + Olaparib
1531	HL-WES-22 (WES) HL114 (RNAseq) HL126 (RNAseq)	WT	COL4A2 (AMP), COL4A1 (AMP), FGFR2 (fusion)	FGFR2 (fusion), MAP2K7 (AMP)		FGFR2 (fusion), KDM5C (overexpressed), ERBB4 (fusion)	FGFR2 (fusion)	BGJ398
1536	HL-WES-06 (WES) HL70 (RNAseq) HL71 (RNAseq)	DEL	EPOR (AMP), YWHAB (AMP), PDGFD (AMP), YAP1 (AMP), CDC37 (AMP), PCK1 (AMP)	MAPK8 (AMP), STK4 (AMP)		AURKB (overexpressed), AURKA (AMP), YAP1 (AMP)	AURKA (AMP), YAP1 (AMP)	Alisertib Tozasertib + Vertipofin + Olaparib
1573	HL-WES-50 (WES) HL127 (RNAseq)	DEL				ARID2 (p.Ser996* truncating), EZH2 (overexpressed)
1585	HL-WES-51 (WES) HL128 (RNAseq)	DEL	COL1A2 (fusion), MYC (AMP), LAMA4 (fusion), COL1A1 (fusion), COL6A3 (fusion)	MYC (AMP)		MYC (AMP)	MYC (AMP)	Quarfloxin + Olaparib
1586	HL-WES-52 (WES) HL147 (RNAseq)	DEL	FGFR2 (fusion), FGFR2 (overexpressed)	FGFR2 (fusion), FGFR2 (overexpressed)		FGFR2 (fusion), FGFR2 (overexpressed)	FGFR2 (fusion), FGFR2 (overexpressed)	BGJ398 + Olaparib**
1596	HL-WES-67 (WES) HL163 (RNAseq)	WT	MET (AMP), THBS1 (c.2148+2T>G splice variant), MET (overexpressed), MET (fusion)	FLNC (AMP)		MET (AMP), MET (overexpressed), EZH2 (overexpressed)	MET (AMP), MET (overexpressed)	Cabozantinib Crizotinib
1597	HL-WES-23 (WES) HL105 (RNAseq) HL129 (RNAseq)	WT	MET (AMP), TEK (fusion)			MET (AMP)	MET (AMP)	Cabozantinib Crizotinib
1601	HL-WES-24 (WES) HL106 (RNAseq)	DEL	LAMA2 (AMP), SGK1 (AMP), MYB (AMP), COL6A3 (AMP)	MAP3K5 (AMP), MAPKAPK2 (fusion)		AURKB (overexpressed), KDM5C (overexpressed), EZH2 (overexpressed)	AURKB (overexpressed)	Danusertib Barasertib + Olaparib*
1605	HL-WES-68 (WES) HL164 (RNAseq)	WT	MET (AMP), MET (overexpressed)			MET (AMP), MET (overexpressed)	MET (AMP), MET (overexpressed)	Cabozantinib Crizotinib
1608	HL130 (RNAseq)	DEL	COL4A1 (fusion)			APC (p.Ile2181fs truncating)	Wnt pathway	LGK974 + Ola
1614	HL-WES-07 (WES) HL79 (RNAseq)	DEL	RAF1 (fusion)	RAF1 (fusion)		RAF1 (fusion), CCNE1 (overexpressed)	RAF1 (fusion)	Tremetinib + Olaparib
1616	HL-WES-08 (WES) HL50 (RNAseq)	DEL	LPAR4 (DEL), LAMC1 (AMP), EGFR (AMP), GNG2 (DEL), IL2RG (DEL), FGF16 (DEL), FASLG (AMP), TNR (AMP), COL4A6 (DEL), TNN (AMP), G6PC (DEL), GRB2 (AMP), RPTOR (AMP), G6PC3 (DEL), ATF2 (AMP), BRCA1 (DEL), ITGB4 (AMP), LAMC2 (AMP), IL3RA (DEL), ITGA2B (DEL), PPP2R5A (AMP), LAMB3 (AMP), COL4A5 (DEL)	FASLG (AMP), PLA2G4A (AMP), DUSP3 (DEL), FLNB (DEL), GRB2 (AMP), FGF16 (DEL), CACNA2D3 (DEL), EGFR (AMP), RPS6KA3 (DEL), DUSP10 (AMP), CACNA1D (DEL), PPP3R1 (AMP), ATF2 (AMP), RAC3 (AMP), RPS6KA6 (DEL), PPP3CB (DEL), TGFB2 (AMP), CACNA1E (AMP), MAPK8 (DEL), CACNA1S (AMP), NFATC1 (DEL)		BRCA1 (DEL), PBRM1 (DEL), BAP1 (DEL), DDR2 (AMP), SMAD4 (DEL), EGFR (AMP), MED12 (DEL), SMAD2 (DEL), CCNE1 (overexpressed), ATRX (DEL), EZH2 (overexpressed)	EGFR (AMP)	Gefitinib + Olaparib
1660	HL-WES-09 (WES) HL76 (RNAseq)	DEL	PIK3R1 (p.Glu451* truncating), PTEN (DEL)			PIK3R1 (p.Glu451* truncating), PTEN (DEL), EZH2 (overexpressed)	PIK3R1 (p.Glu451* truncating), PTEN (DEL)	BYL719 + Olaparib
1661	HL-WES-10 (WES) HL77 (RNAseq)	DEL	COL9A2 (AMP)			KDM5C (overexpressed)
1662	HL104 (RNAseq) HL148 (RNAseq)	DEL				CCNE1 (overexpressed), APC (p.Ile2181fs truncating)	Wnt pathway	LGK974 + Olaparib
1673	HL-WES-53 (WES) HL149 (RNAseq)	DEL				EZH2 (overexpressed)
1702	HL-WES-25 (WES) HL108 (RNAseq) HL155 (RNAseq)	WT
1716	HL-WES-54 (WES) HL131 (RNAseq)	DEL				AURKB (overexpressed), ARID2 (p.Ile177fs truncating)
1720	HL-WES-26 (WES) HL01 (RNAseq) HL02 (RNAseq)	WT	GNB1 (fusion), COL1A2 (fusion), ITGAV (fusion), COL6A3 (fusion), COL1A1 (fusion)
1783-1	HL-WES-69 (WES) HL165 (RNAseq)	WT
1783-2	HL-WES-70 (WES) HL166 (RNAseq)	WT	MET (AMP), KRAS (Q61H), FN1 (fusion)	KRAS (Q61H), FLNC (AMP)	KRAS (Q61)	MET (AMP), RHOA (overexpressed), KRAS-Q61H	MET (AMP), KRAS-Q61H	Trametinib GDC-0994, + Cabozantinib Crizotinib
1794	HL-WES-55 (WES)	DEL	IL3RA (AMP)
1795	HL-WES-11 (WES) HL75 (RNAseq)	DEL	CDK2 (DEL), FGF9 (DEL), PCK2 (DEL), CREB3L3 (DEL), MDM2 (DEL), OSMR (AMP), PRKAA1 (AMP), FGF14 (DEL), CDK4 (DEL), MAP2K2 (DEL), KITLG (DEL), PPP2R2A (DEL), GNG7 (DEL), FGF17 (DEL), HSP90B1 (DEL), IGF1 (DEL), ITGA7 (DEL)	FGF9 (DEL), RAP1B (DEL), DUSP6 (DEL), MKNK2 (DEL), GADD45B (DEL), FGF14 (DEL), FGF17 (DEL), MAP2K2 (DEL), DDIT3 (DEL), PPP3CC (DEL), PTPRR (DEL)		RB1 (DEL), RICTOR (AMP), KDM5C (overexpressed), EZH2 (overexpressed)
1841	HL133 (RNAseq)	DEL		RASGRF2 (fusion)
1857	HL-WES-27 (WES) HL109 (RNAseq)	WT	RAF1 (fusion)	RAF1 (fusion)		RAF1 (fusion)	RAF1 (fusion)	Tremetinib
1867-1	HL-WES-28 (WES) HL113 (RNAseq) HL134 (RNAseq)	WT	PDGFD (AMP), CDK6 (AMP), YAP1 (AMP), YAP1 (overexpressed)			YAP1 (overexpressed), CDK6 (AMP), YAP1 (AMP)	YAP1 (overexpressed), CDK6 (AMP), YAP1 (AMP)	Palbociclib Ribociclib + Verteporfin
1867-2	HL-167-2 (RNAseq) HL-WES-71 (WES)	WT	MET (AMP), TNC (fusion), MET (overexpressed), COL1A2 (fusion)			MET (AMP), MET (overexpressed)	MET (AMP), MET (overexpressed)	Cabozantinib Crizotinib
1901	HL-WES-56 (WES) HL135 (RNAseq)	DEL	PTEN (fusion)			CCNE1 (overexpressed)
1938	HL-WES-74 (WES) HL169 (RNAseq)	WT	TP53 (fusion), YWHAG (fusion)	TP53 (fusion)		AURKB (overexpressed), CCNE1 (overexpressed)
1957	HL-WES-72 (WES) HL170 (RNAseq)	WT	TEK (fusion), FN1 (fusion), MYC (AMP), TEK (AMP)	JUN (AMP), MYC (AMP)		RHOA (overexpressed), JUN (AMP), MYC (AMP)	JUN (AMP), MYC (AMP)	Quarfloxin
1973	HL-WES-73 (WES) HL168 (RNAseq)	WT	MET (AMP), FN1 (fusion), MET (overexpressed), MET (fusion)			MET (AMP), MET (overexpressed)	MET (AMP), MET (overexpressed)	Cabozantinib Crizotinib
2005	HL-WES-30 (WES) HL112 (RNAseq)	WT	PDGFD (AMP), YAP1 (AMP)			YAP1 (AMP)	YAP1 (AMP)	Verteporfin
2029-1	HL-WES-76 (WES) HL171 (RNAseq)	WT	GNG7 (fusion), COL1A1 (fusion), MYC (AMP), PDGFD (AMP), YAP1 (AMP), ITGB1 (fusion)	MYC (AMP)		MYC (AMP), YAP1 (AMP)	MYC (AMP), YAP1 (AMP)	Verteporfin + Quarfloxin
2029-2	HL-WES-75 (WES)	WT
2032	HL-WES-77 (WES) HL173 (RNAseq)	WT	COL1A1 (fusion), COL1A2 (fusion), CDK4 (fusion), PDGFD (AMP), YAP1 (AMP), YAP1 (overexpressed), FN1 (fusion)			YAP1 (overexpressed), ATR (p.Asn1135fs truncating), YAP1 (AMP)	YAP1 (overexpressed), ATR (p.Asn1135fs truncating), YAP1 (AMP)	Olaparib + Verteporfin
2080	HL-WES-78 (WES) HL174 (RNAseq)	WT	YAP1 (overexpressed), YAP1 (AMP)			YAP1 (overexpressed), YAP1 (AMP), APC (p.Ile2181fs truncating)	YAP1 (AMP), YAP1 (overexpressed)	Verteporfin
2083	HL-WES-79 (WES) HL175 (RNAseq)	WT	FN1 (fusion)			RHOA (overexpressed)
81113	HL-WES-80 (WES) HL177 (RNAseq)	WT	COL4A2 (AMP), COL4A1 (AMP), INSR (AMP)	MAP2K6 (AMP), NF1 (DEL)		NF1 (DEL)
120913	HL-WES-81 (WES) HL176 (RNAseq)	WT	MET (AMP), MTOR (p.Arg53* truncating), YAP1 (fusion), PDGFD (AMP), CSF1R (c.2648+1G>A splice variant), YAP1 (AMP), YAP1 (overexpressed), FN1 (fusion)			MET (AMP), YAP1 (overexpressed), YAP1 (fusion), YAP1 (AMP)	MET (AMP),YAP1 (fusion), YAP1 (AMP), YAP1 (overexpressed)	Cabozantinib Crizotinib +Verteporfin

## Sheet: pathway genes
gene	pathway
AKT1	MAPK;PI3K
AKT2	MAPK;PI3K
AKT3	MAPK;PI3K
ANGPT1	PI3K
ANGPT2	PI3K
ANGPT4	PI3K
ARRB1	MAPK
ARRB2	MAPK
ATF2	MAPK;PI3K
ATF4	MAPK;PI3K
ATF6B	PI3K
BAD	PI3K
BCL2	PI3K
BCL2L1	PI3K
BCL2L11	PI3K
BDNF	MAPK
BRAF	MAPK
BRCA1	PI3K
C8orf44-SGK3	PI3K
CACNA1A	MAPK
CACNA1B	MAPK
CACNA1C	MAPK
CACNA1D	MAPK
CACNA1E	MAPK
CACNA1F	MAPK
CACNA1G	MAPK
CACNA1H	MAPK
CACNA1I	MAPK
CACNA1S	MAPK
CACNA2D1	MAPK
CACNA2D2	MAPK
CACNA2D3	MAPK
CACNA2D4	MAPK
CACNB1	MAPK
CACNB2	MAPK
CACNB3	MAPK
CACNB4	MAPK
CACNG1	MAPK
CACNG2	MAPK
CACNG3	MAPK
CACNG4	MAPK
CACNG5	MAPK
CACNG6	MAPK
CACNG7	MAPK
CACNG8	MAPK
CASP3	MAPK
CASP9	PI3K
CCND1	PI3K
CCND2	PI3K
CCND3	PI3K
CCNE1	PI3K
CCNE2	PI3K
CD14	MAPK
CD19	PI3K
CDC25B	MAPK
CDC37	PI3K
CDC42	MAPK
CDK2	PI3K
CDK4	PI3K
CDK6	PI3K
CDKN1A	PI3K
CDKN1B	PI3K
CHAD	PI3K
CHRM1	PI3K
CHRM2	PI3K
CHUK	MAPK;PI3K
COL1A1	PI3K
COL1A2	PI3K
COL2A1	PI3K
COL4A1	PI3K
COL4A2	PI3K
COL4A3	PI3K
COL4A4	PI3K
COL4A5	PI3K
COL4A6	PI3K
COL6A1	PI3K
COL6A2	PI3K
COL6A3	PI3K
COL6A5	PI3K
COL6A6	PI3K
COL9A1	PI3K
COL9A2	PI3K
COL9A3	PI3K
COMP	PI3K
CREB1	PI3K
CREB3	PI3K
CREB3L1	PI3K
CREB3L2	PI3K
CREB3L3	PI3K
CREB3L4	PI3K
CREB5	PI3K
CRK	MAPK
CRKL	MAPK
CRTC2	PI3K
CSF1	PI3K
CSF1R	PI3K
CSF3	PI3K
CSF3R	PI3K
CSH1	PI3K
CSH2	PI3K
DAXX	MAPK
DDIT3	MAPK
DDIT4	PI3K
DUSP1	MAPK
DUSP10	MAPK
DUSP16	MAPK
DUSP2	MAPK
DUSP3	MAPK
DUSP4	MAPK
DUSP5	MAPK
DUSP6	MAPK
DUSP7	MAPK
DUSP8	MAPK
DUSP9	MAPK
ECSIT	MAPK
EFNA1	PI3K
EFNA2	PI3K
EFNA3	PI3K
EFNA4	PI3K
EFNA5	PI3K
EGF	MAPK;PI3K
EGFR	MAPK;PI3K
EIF4B	PI3K
EIF4E	PI3K
EIF4E1B	PI3K
EIF4E2	PI3K
EIF4EBP1	PI3K
ELK1	MAPK
ELK4	MAPK
EPHA2	PI3K
EPO	PI3K
EPOR	PI3K
F2R	PI3K
FAS	MAPK
FASLG	MAPK;PI3K
FGF1	MAPK;PI3K
FGF10	MAPK;PI3K
FGF11	MAPK;PI3K
FGF12	MAPK;PI3K
FGF13	MAPK;PI3K
FGF14	MAPK;PI3K
FGF16	MAPK;PI3K
FGF17	MAPK;PI3K
FGF18	MAPK;PI3K
FGF19	MAPK;PI3K
FGF2	MAPK;PI3K
FGF20	MAPK;PI3K
FGF21	MAPK;PI3K
FGF22	MAPK;PI3K
FGF23	MAPK;PI3K
FGF3	MAPK;PI3K
FGF4	MAPK;PI3K
FGF5	MAPK;PI3K
FGF6	MAPK;PI3K
FGF7	MAPK;PI3K
FGF8	MAPK;PI3K
FGF9	MAPK;PI3K
FGFR1	MAPK;PI3K
FGFR2	MAPK;PI3K
FGFR3	MAPK;PI3K
FGFR4	MAPK;PI3K
FLNA	MAPK
FLNB	MAPK
FLNC	MAPK
FLT1	PI3K
FLT4	PI3K
FN1	PI3K
FOS	MAPK
FOXO3	PI3K
G6PC	PI3K
G6PC2	PI3K
G6PC3	PI3K
GADD45A	MAPK
GADD45B	MAPK
GADD45G	MAPK
GH1	PI3K
GH2	PI3K
GHR	PI3K
GNA12	MAPK
GNB1	PI3K
GNB2	PI3K
GNB3	PI3K
GNB4	PI3K
GNB5	PI3K
GNG10	PI3K
GNG11	PI3K
GNG12	MAPK;PI3K
GNG13	PI3K
GNG2	PI3K
GNG3	PI3K
GNG4	PI3K
GNG5	PI3K
GNG7	PI3K
GNG8	PI3K
GNGT1	PI3K
GNGT2	PI3K
GRB2	MAPK;PI3K
GSK3B	PI3K
GYS1	PI3K
GYS2	PI3K
HGF	PI3K
HRAS	MAPK;PI3K
HSP90AA1	PI3K
HSP90AB1	PI3K
HSP90B1	PI3K
HSPA1A	MAPK
HSPA1B	MAPK
HSPA1L	MAPK
HSPA2	MAPK
HSPA6	MAPK
HSPA8	MAPK
HSPB1	MAPK
IBSP	PI3K
IFNA1	PI3K
IFNA10	PI3K
IFNA13	PI3K
IFNA14	PI3K
IFNA16	PI3K
IFNA17	PI3K
IFNA2	PI3K
IFNA21	PI3K
IFNA4	PI3K
IFNA5	PI3K
IFNA6	PI3K
IFNA7	PI3K
IFNA8	PI3K
IFNAR1	PI3K
IFNAR2	PI3K
IFNB1	PI3K
IGF1	PI3K
IGF1R	PI3K
IGH	PI3K
IKBKB	MAPK;PI3K
IKBKG	MAPK;PI3K
IL1A	MAPK
IL1B	MAPK
IL1R1	MAPK
IL1R2	MAPK
IL2	PI3K
IL2RA	PI3K
IL2RB	PI3K
IL2RG	PI3K
IL3	PI3K
IL3RA	PI3K
IL4	PI3K
IL4R	PI3K
IL6	PI3K
IL6R	PI3K
IL7	PI3K
IL7R	PI3K
INS	PI3K
INSR	PI3K
IRS1	PI3K
ITGA1	PI3K
ITGA10	PI3K
ITGA11	PI3K
ITGA2	PI3K
ITGA2B	PI3K
ITGA3	PI3K
ITGA4	PI3K
ITGA5	PI3K
ITGA6	PI3K
ITGA7	PI3K
ITGA8	PI3K
ITGA9	PI3K
ITGAV	PI3K
ITGB1	PI3K
ITGB3	PI3K
ITGB4	PI3K
ITGB5	PI3K
ITGB6	PI3K
ITGB7	PI3K
ITGB8	PI3K
JAK1	PI3K
JAK2	PI3K
JAK3	PI3K
JMJD7-PLA2G4B	MAPK
JUN	MAPK
JUND	MAPK
KDR	PI3K
KIT	PI3K
KITLG	PI3K
KRAS	MAPK;PI3K
LAMA1	PI3K
LAMA2	PI3K
LAMA3	PI3K
LAMA4	PI3K
LAMA5	PI3K
LAMB1	PI3K
LAMB2	PI3K
LAMB3	PI3K
LAMB4	PI3K
LAMC1	PI3K
LAMC2	PI3K
LAMC3	PI3K
LAMTOR3	MAPK
LPAR1	PI3K
LPAR2	PI3K
LPAR3	PI3K
LPAR4	PI3K
LPAR5	PI3K
LPAR6	PI3K
MAP2K1	MAPK;PI3K
MAP2K2	MAPK;PI3K
MAP2K3	MAPK
MAP2K4	MAPK
MAP2K5	MAPK
MAP2K6	MAPK
MAP2K7	MAPK
MAP3K1	MAPK
MAP3K11	MAPK
MAP3K12	MAPK
MAP3K13	MAPK
MAP3K14	MAPK
MAP3K2	MAPK
MAP3K20	MAPK
MAP3K3	MAPK
MAP3K4	MAPK
MAP3K5	MAPK
MAP3K6	MAPK
MAP3K7	MAPK
MAP3K8	MAPK
MAP4K1	MAPK
MAP4K2	MAPK
MAP4K3	MAPK
MAP4K4	MAPK
MAPK1	MAPK;PI3K
MAPK10	MAPK
MAPK11	MAPK
MAPK12	MAPK
MAPK13	MAPK
MAPK14	MAPK
MAPK3	MAPK;PI3K
MAPK7	MAPK
MAPK8	MAPK
MAPK8IP1	MAPK
MAPK8IP2	MAPK
MAPK8IP3	MAPK
MAPK9	MAPK
MAPKAPK2	MAPK
MAPKAPK3	MAPK
MAPKAPK5	MAPK
MAPT	MAPK
MAX	MAPK
MCL1	PI3K
MDM2	PI3K
MECOM	MAPK
MEF2C	MAPK
MET	PI3K
MKNK1	MAPK
MKNK2	MAPK
MLST8	PI3K
MOS	MAPK
MRAS	MAPK
MTCP1	PI3K
MTOR	PI3K
MYB	PI3K
MYC	MAPK;PI3K
NF1	MAPK
NFATC1	MAPK
NFATC3	MAPK
NFKB1	MAPK;PI3K
NFKB2	MAPK
NGF	MAPK;PI3K
NGFR	PI3K
NLK	MAPK
NOS3	PI3K
NR4A1	MAPK;PI3K
NRAS	MAPK;PI3K
NTF3	MAPK
NTF4	MAPK
NTRK1	MAPK
NTRK2	MAPK
OSM	PI3K
OSMR	PI3K
PAK1	MAPK
PAK2	MAPK
PCK1	PI3K
PCK2	PI3K
PDGFA	MAPK;PI3K
PDGFB	MAPK;PI3K
PDGFC	PI3K
PDGFD	PI3K
PDGFRA	MAPK;PI3K
PDGFRB	MAPK;PI3K
PDPK1	PI3K
PGF	PI3K
PHLPP1	PI3K
PHLPP2	PI3K
PIK3AP1	PI3K
PIK3CA	PI3K
PIK3CB	PI3K
PIK3CD	PI3K
PIK3CG	PI3K
PIK3R1	PI3K
PIK3R2	PI3K
PIK3R3	PI3K
PIK3R5	PI3K
PIK3R6	PI3K
PKN1	PI3K
PKN2	PI3K
PKN3	PI3K
PLA2G4A	MAPK
PLA2G4B	MAPK
PLA2G4C	MAPK
PLA2G4D	MAPK
PLA2G4E	MAPK
PLA2G4F	MAPK
PPM1A	MAPK
PPM1B	MAPK
PPP2CA	PI3K
PPP2CB	PI3K
PPP2R1A	PI3K
PPP2R1B	PI3K
PPP2R2A	PI3K
PPP2R2B	PI3K
PPP2R2C	PI3K
PPP2R2D	PI3K
PPP2R3A	PI3K
PPP2R3B	PI3K
PPP2R3C	PI3K
PPP2R5A	PI3K
PPP2R5B	PI3K
PPP2R5C	PI3K
PPP2R5D	PI3K
PPP2R5E	PI3K
PPP3CA	MAPK
PPP3CB	MAPK
PPP3CC	MAPK
PPP3R1	MAPK
PPP3R2	MAPK
PPP5C	MAPK
PPP5D1	MAPK
PRKAA1	PI3K
PRKAA2	PI3K
PRKACA	MAPK
PRKACB	MAPK
PRKACG	MAPK
PRKCA	MAPK;PI3K
PRKCB	MAPK
PRKCG	MAPK
PRL	PI3K
PRLR	PI3K
PTEN	PI3K
PTK2	PI3K
PTPN5	MAPK
PTPN7	MAPK
PTPRR	MAPK
RAC1	MAPK;PI3K
RAC2	MAPK
RAC3	MAPK
RAF1	MAPK;PI3K
RAP1A	MAPK
RAP1B	MAPK
RAPGEF2	MAPK
RASA1	MAPK
RASA2	MAPK
RASGRF1	MAPK
RASGRF2	MAPK
RASGRP1	MAPK
RASGRP2	MAPK
RASGRP3	MAPK
RASGRP4	MAPK
RBL2	PI3K
RELA	MAPK;PI3K
RELB	MAPK
RELN	PI3K
RHEB	PI3K
RPS6	PI3K
RPS6KA1	MAPK
RPS6KA2	MAPK
RPS6KA3	MAPK
RPS6KA4	MAPK
RPS6KA5	MAPK
RPS6KA6	MAPK
RPS6KB1	PI3K
RPS6KB2	PI3K
RPTOR	PI3K
RRAS	MAPK
RRAS2	MAPK
RXRA	PI3K
SGK1	PI3K
SGK2	PI3K
SGK3	PI3K
SOS1	MAPK;PI3K
SOS2	MAPK;PI3K
SPP1	PI3K
SRF	MAPK
STK11	PI3K
STK3	MAPK
STK4	MAPK
STMN1	MAPK
SYK	PI3K
TAB1	MAPK
TAB2	MAPK
TAOK1	MAPK
TAOK2	MAPK
TAOK3	MAPK
TCL1A	PI3K
TCL1B	PI3K
TEK	PI3K
TGFB1	MAPK
TGFB2	MAPK
TGFB3	MAPK
TGFBR1	MAPK
TGFBR2	MAPK
THBS1	PI3K
THBS2	PI3K
THBS3	PI3K
THBS4	PI3K
THEM4	PI3K
TLR2	PI3K
TLR4	PI3K
TNC	PI3K
TNF	MAPK
TNFRSF1A	MAPK
TNN	PI3K
TNR	PI3K
TNXB	PI3K
TP53	MAPK;PI3K
TRAF2	MAPK
TRAF6	MAPK
TSC1	PI3K
TSC2	PI3K
VEGFA	PI3K
VEGFB	PI3K
VEGFC	PI3K
VEGFD	PI3K
VTN	PI3K
VWF	PI3K
YAP1	PI3K
YWHAB	PI3K
YWHAE	PI3K
YWHAG	PI3K
YWHAH	PI3K
YWHAQ	PI3K
YWHAZ	PI3K
